# Supplementary material for: Neonatal-derived IL-17 producing dermal γδ T cells are required to prevent spontaneous atopic dermatitis
Source: eLife. 2020 Feb 17;9:e51188. doi: 10.7554/eLife.51188 (PMC7025821; doi:10.7554/eLife.51188)
Supplement: Figure 3—source data 1. [file elife-51188-fig3-data1.xlsx]

## Sheet: 3wk KC RNA-seq
Source Data for Figure 3A upper panel. Data are expressed as normalized RPKM+1.
Gene_Symbol	DESCRIPTION	LMC.KC#5	LMC.KC#7	S13KO.KC#1	S13KO.KC#3	Avg_LMC	Avg_S13KO	FC_KOvsLMC
Krt77	Krt77	1.96839	1	4.58561	74.4042	1.48419	39.4949	26.6103
Irs3	Irs3	1	1	20.7209	12.1218	1	16.4214	16.4214
Wdr95	Wdr95	4.87355	8.82661	112.154	57.7214	6.85008	84.9377	12.3995
Oas1e	Oas1e	1	1	12.6532	12.1218	1	12.3875	12.3875
Efr3b	Efr3b	2.93678	7.70853	71.8158	52.1605	5.32265	61.9882	11.6461
Pglyrp4	Pglyrp4	1.96839	2.11809	15.3424	32.1412	2.04324	23.7418	11.6197
Neu2	Neu2	1	1	14.446	8.78529	1	11.6157	11.6157
Disp2	Disp2	1	1	4.58561	17.6828	1	11.1342	11.1342
0610012D04Rik	0610012D04Rik	1	1	9.06762	11.0097	1	10.0386	10.0386
Hspa1a	Hspa1a	1376.11	1777.64	18354	13019.1	1576.88	15686.5	9.94786
Ccdc158	Ccdc158	1	1	14.446	5.44874	1	9.94739	9.94739
Cilp	Cilp	1	1	11.7568	7.67311	1	9.71497	9.71497
Tmem45a2	Tmem45a2	1	2.11809	1.8964	27.6924	1.55904	14.7944	9.48942
C130050O18Rik	C130050O18Rik	1.96839	2.11809	16.2388	22.1315	2.04324	19.1852	9.3896
Nyap1	Nyap1	1.96839	1	18.9281	8.78529	1.48419	13.8567	9.33616
Gm15502	Gm15502	1	1	7.27482	11.0097	1	9.14224	9.14224
Elane	Elane	1	1	12.6532	5.44874	1	9.05099	9.05099
Fgf1	Fgf1	1	2.11809	17.1352	11.0097	1.55904	14.0725	9.02634
Krtap4-16	Krtap4-16	1	1	3.68921	14.3462	1	9.01771	9.01771
AU019990	AU019990	1	1	9.06762	8.78529	1	8.92646	8.92646
Gm43761	Gm43761	1	1	9.06762	8.78529	1	8.92646	8.92646
Cpa4	Cpa4	2.93678	1	4.58561	29.9168	1.96839	17.2512	8.76413
Edn2	Edn2	14.5574	27.8341	216.137	147.808	21.1958	181.973	8.58532
Gm26925	Gm26925	1	1	9.06762	7.67311	1	8.37037	8.37037
Zfp617	Zfp617	4.87355	1	24.3065	23.2437	2.93678	23.7751	8.09564
Mef2b	Mef2b	1	1	11.7568	4.33655	1	8.04669	8.04669
Tsc22d3	Tsc22d3	171.436	227.972	1696.1	1482.43	199.704	1589.26	7.9581
Gm44415	Gm44415	1	3.23618	14.446	18.795	2.11809	16.6205	7.84694
Ssc4d	Ssc4d	1	1	9.06762	6.56092	1	7.81427	7.81427
Pkdrej	Pkdrej	1	1	9.96403	5.44874	1	7.70638	7.70638
Gm44901	Gm44901	1	1	5.48201	9.89748	1	7.68975	7.68975
Stk36	Stk36	1	1	5.48201	9.89748	1	7.68975	7.68975
Gm8818	Gm8818	4.87355	1	31.4777	13.234	2.93678	22.3559	7.61238
Ly6g6f	Ly6g6f	1	1	10.8604	4.33655	1	7.59849	7.59849
Ppp1r3b	Ppp1r3b	1	3.23618	20.7209	11.0097	2.11809	15.8653	7.49037
Ccnjl	Ccnjl	1	1	12.6532	2.11218	1	7.38271	7.38271
Gen1	Gen1	1.96839	2.11809	18.0317	12.1218	2.04324	15.0767	7.37885
Tmem266	Tmem266	1	1	8.17122	6.56092	1	7.36607	7.36607
Sytl4	Sytl4	1	1	13.5496	1	1	7.27482	7.27482
Xirp1	Xirp1	1	6.59044	34.1669	21.0193	3.79522	27.5931	7.27049
Ccdc34os	Ccdc34os	1.96839	4.35426	25.2029	19.9071	3.16133	22.555	7.13467
Gatm	Gatm	1	1	1	13.234	1	7.11702	7.11702
Rgl1	Rgl1	1.96839	1	5.48201	15.4584	1.48419	10.4702	7.05447
Gm18388	Gm18388	1	1	10.8604	3.22437	1	7.0424	7.0424
Gm44005	Gm44005	1	1	11.7568	2.11218	1	6.93451	6.93451
Gm3103	Gm3103	1	1	2.79281	11.0097	1	6.90123	6.90123
Traf1	Traf1	1	1	12.6532	1	1	6.82662	6.82662
Arl4aos	Arl4aos	1	1	3.68921	9.89748	1	6.79334	6.79334
BC018473	BC018473	1	3.23618	3.68921	24.3559	2.11809	14.0225	6.62038
Gm17813	Gm17813	1	1	9.96403	3.22437	1	6.5942	6.5942
Gm45602	Gm45602	1.96839	1	16.2388	3.22437	1.48419	9.73161	6.55683
Catsperd	Catsperd	1	3.23618	5.48201	22.1315	2.11809	13.8068	6.5185
Lipk	Lipk	1	1	10.8604	2.11218	1	6.48631	6.48631
Disp3	Disp3	1	1	6.37842	6.56092	1	6.46967	6.46967
Chic1	Chic1	1	1	6.37842	6.56092	1	6.46967	6.46967
Gm15953	Gm15953	1	1	6.37842	6.56092	1	6.46967	6.46967
Pax4	Pax4	1	1	1.8964	11.0097	1	6.45303	6.45303
Zfp760	Zfp760	3.90516	1	12.6532	18.795	2.45258	15.7241	6.41124
Myom3	Myom3	1.96839	4.35426	31.4777	8.78529	3.16133	20.1315	6.36805
Gm45234	Gm45234	1	1	7.27482	5.44874	1	6.36178	6.36178
Uts2	Uts2	1	1	7.27482	5.44874	1	6.36178	6.36178
Krt90	Krt90	1	1	2.79281	9.89748	1	6.34514	6.34514
Slc44a4	Slc44a4	7.77871	2.11809	44.9237	17.6828	4.9484	31.3033	6.32593
Zfp13	Zfp13	10.6839	2.11809	28.7885	52.1605	6.40098	40.4745	6.32317
Gm20717	Gm20717	3.90516	1	15.3424	15.4584	2.45258	15.4004	6.27927
Mmp12	Mmp12	1.96839	17.7713	59.2662	64.3945	9.86985	61.8304	6.26457
Hist2h2be	Hist2h2be	1	3.23618	9.96403	16.5706	2.11809	13.2673	6.26381
Pbp2	Pbp2	1	1	3.68921	8.78529	1	6.23725	6.23725
Dusp9	Dusp9	1	2.11809	2.79281	16.5706	1.55904	9.6817	6.21002
Lrrc23	Lrrc23	1.96839	1	11.7568	6.56092	1.48419	9.15888	6.17094
Hspb1	Hspb1	986.819	1110.14	6601.21	6331.56	1048.48	6466.38	6.16738
Gm17068	Gm17068	1	1	9.06762	3.22437	1	6.146	6.146
AC154176.2	AC154176.2	1.96839	1	3.68921	14.3462	1.48419	9.01771	6.07583
Slc47a1	Slc47a1	1	1	9.96403	2.11218	1	6.03811	6.03811
Cutal	Cutal	1	1	5.48201	6.56092	1	6.02147	6.02147
1700086D15Rik	1700086D15Rik	1.96839	1	4.58561	13.234	1.48419	8.90982	6.00314
Zfp2	Zfp2	3.90516	6.59044	40.4417	22.1315	5.2478	31.2866	5.96185
Nat8f4	Nat8f4	1	3.23618	15.3424	9.89748	2.11809	12.62	5.95819
Gm20554	Gm20554	1.96839	1	5.48201	12.1218	1.48419	8.80193	5.93045
Zfp128	Zfp128	1	1	10.8604	1	1	5.93022	5.93022
0610009L18Rik	0610009L18Rik	1	1	6.37842	5.44874	1	5.91358	5.91358
Gm18586	Gm18586	1	1	1.8964	9.89748	1	5.89694	5.89694
Gm9817	Gm9817	9.71549	4.35426	44.0273	37.7021	7.03488	40.8647	5.80887
Hoxa1	Hoxa1	2.93678	1	16.2388	6.56092	1.96839	11.3999	5.79148
4930547M16Rik	4930547M16Rik	1	1	2.79281	8.78529	1	5.78905	5.78905
Trp53tg5	Trp53tg5	1	1	2.79281	8.78529	1	5.78905	5.78905
Gm15753	Gm15753	1.96839	1	12.6532	4.33655	1.48419	8.49489	5.72358
Gm12703	Gm12703	1	1	8.17122	3.22437	1	5.6978	5.6978
Lpcat1	Lpcat1	1	1	8.17122	3.22437	1	5.6978	5.6978
Krt7	Krt7	1	4.35426	12.6532	17.6828	2.67713	15.168	5.66577
Arl5c	Arl5c	1	1	9.06762	2.11218	1	5.5899	5.5899
Mal	Mal	1	1	9.06762	2.11218	1	5.5899	5.5899
Adamts4	Adamts4	1	1	9.06762	2.11218	1	5.5899	5.5899
Hspa1b	Hspa1b	311.852	324.127	1985.64	1564.73	317.99	1775.18	5.58252
Gm8801	Gm8801	2.93678	2.11809	21.6173	6.56092	2.52743	14.0891	5.57447
Gm37200	Gm37200	1	1	4.58561	6.56092	1	5.57327	5.57327
Styxl1	Styxl1	1	1	4.58561	6.56092	1	5.57327	5.57327
Gm7535	Gm7535	1.96839	1	9.96403	6.56092	1.48419	8.26248	5.56698
Hist1h2ac	Hist1h2ac	1.96839	1	9.96403	6.56092	1.48419	8.26248	5.56698
Pcdhga6	Pcdhga6	1	2.11809	1.8964	15.4584	1.55904	8.6774	5.56585
Gper1	Gper1	1	3.23618	18.0317	5.44874	2.11809	11.7402	5.54283
Ctrl	Ctrl	1	4.35426	10.8604	18.795	2.67713	14.8277	5.53865
Nfatc2	Nfatc2	1	2.11809	16.2388	1	1.55904	8.61942	5.52866
Tspan15	Tspan15	22.3045	6.59044	90.6403	68.8433	14.4475	79.7418	5.51942
Bsx	Bsx	5.84194	5.47235	32.3741	29.9168	5.65714	31.1454	5.50551
Lrrc27	Lrrc27	1.96839	1	6.37842	9.89748	1.48419	8.13795	5.48308
Cplx2	Cplx2	1.96839	1	6.37842	9.89748	1.48419	8.13795	5.48308
Gm37699	Gm37699	1	1	9.96403	1	1	5.48201	5.48201
Gsg1l	Gsg1l	1	1	9.96403	1	1	5.48201	5.48201
Gpc6	Gpc6	1	1	9.96403	1	1	5.48201	5.48201
Morn4	Morn4	1	1	9.96403	1	1	5.48201	5.48201
Psmb11	Psmb11	1.96839	1	1.8964	14.3462	1.48419	8.12131	5.47187
4833407H14Rik	4833407H14Rik	1	1	5.48201	5.44874	1	5.46538	5.46538
Gstt1	Gstt1	1	1	5.48201	5.44874	1	5.46538	5.46538
Zfp786	Zfp786	1	1	5.48201	5.44874	1	5.46538	5.46538
Tmem28	Tmem28	1	1	1	9.89748	1	5.44874	5.44874
Gm43847	Gm43847	1	1	1	9.89748	1	5.44874	5.44874
Mybpc1	Mybpc1	1	1	1	9.89748	1	5.44874	5.44874
Sowahb	Sowahb	3.90516	1	14.446	12.1218	2.45258	13.2839	5.41631
Gm37125	Gm37125	1.96839	2.11809	14.446	7.67311	2.04324	11.0596	5.41277
AC161172.1	AC161172.1	1	3.23618	11.7568	11.0097	2.11809	11.3832	5.3743
Rbbp8nl	Rbbp8nl	1	2.11809	9.06762	7.67311	1.55904	8.37037	5.36891
Rps6ka2	Rps6ka2	1	1	6.37842	4.33655	1	5.35749	5.35749
H2-Q7	H2-Q7	1	1	6.37842	4.33655	1	5.35749	5.35749
Ankrd55	Ankrd55	1.96839	2.11809	10.8604	11.0097	2.04324	10.935	5.35182
Crct1	Crct1	1	1	1.8964	8.78529	1	5.34085	5.34085
Gm20390	Gm20390	1	1	1.8964	8.78529	1	5.34085	5.34085
Gm43143	Gm43143	2.93678	1	9.96403	11.0097	1.96839	10.4868	5.32763
Hes1	Hes1	6.81033	3.23618	32.3741	21.0193	5.02325	26.6967	5.31463
Hsp25-ps1	Hsp25-ps1	11.6523	27.8341	105.879	103.321	19.7432	104.6	5.29803
Gm7831	Gm7831	1	1	7.27482	3.22437	1	5.24959	5.24959
Rgsl1	Rgsl1	1	1	7.27482	3.22437	1	5.24959	5.24959
Rpph1	Rpph1	1	1	7.27482	3.22437	1	5.24959	5.24959
Grin1os	Grin1os	1	1	7.27482	3.22437	1	5.24959	5.24959
Apobec3	Apobec3	1	1	7.27482	3.22437	1	5.24959	5.24959
4933405L10Rik	4933405L10Rik	1	1	7.27482	3.22437	1	5.24959	5.24959
Htra4	Htra4	1	1	7.27482	3.22437	1	5.24959	5.24959
Gm26813	Gm26813	1	1	7.27482	3.22437	1	5.24959	5.24959
Gm38098	Gm38098	1	1	2.79281	7.67311	1	5.23296	5.23296
Rpl35a-ps2	Rpl35a-ps2	1	1	2.79281	7.67311	1	5.23296	5.23296
Gm37790	Gm37790	1.96839	2.11809	9.06762	12.1218	2.04324	10.5947	5.18527
Gm13185	Gm13185	2.93678	1	12.6532	7.67311	1.96839	10.1632	5.1632
Zfp870	Zfp870	2.93678	1	12.6532	7.67311	1.96839	10.1632	5.1632
Gm20005	Gm20005	1	2.11809	11.7568	4.33655	1.55904	8.04669	5.1613
Gm15408	Gm15408	1	1	8.17122	2.11218	1	5.1417	5.1417
Stard8	Stard8	1	1	8.17122	2.11218	1	5.1417	5.1417
Trpv5	Trpv5	1	1	8.17122	2.11218	1	5.1417	5.1417
Aspdh	Aspdh	1	1	3.68921	6.56092	1	5.12507	5.12507
Krt25	Krt25	1.96839	1	10.8604	4.33655	1.48419	7.59849	5.11961
Gm19178	Gm19178	1	2.11809	8.17122	7.67311	1.55904	7.92217	5.08143
Aqp10-ps	Aqp10-ps	1	1	9.06762	1	1	5.03381	5.03381
Dbp	Dbp	7.77871	9.9447	45.8201	43.263	8.86171	44.5416	5.0263
A730013G03Rik	A730013G03Rik	1	1	4.58561	5.44874	1	5.01717	5.01717
Gm45629	Gm45629	1	2.11809	9.06762	6.56092	1.55904	7.81427	5.01222
Asb8	Asb8	19.3994	17.7713	121.118	64.3945	18.5853	92.7562	4.99083
Slc8a2	Slc8a2	2.93678	2.11809	10.8604	14.3462	2.52743	12.6033	4.98661
Adam1b	Adam1b	2.93678	1	6.37842	13.234	1.96839	9.80622	4.98186
Dtx3l	Dtx3l	8.7471	11.0628	47.6129	51.0483	9.90495	49.3306	4.9804
Dus4l	Dus4l	4.87355	2.11809	17.1352	17.6828	3.49582	17.409	4.97995
4930562A09Rik	4930562A09Rik	1	3.23618	9.96403	11.0097	2.11809	10.4868	4.95109
Rasl2-9	Rasl2-9	1	2.11809	9.96403	5.44874	1.55904	7.70638	4.94302
Pcyt1b	Pcyt1b	1.96839	3.23618	13.5496	12.1218	2.60228	12.8357	4.9325
Mkrn2os	Mkrn2os	1	2.11809	5.48201	9.89748	1.55904	7.68975	4.93235
Dlg4	Dlg4	1.96839	7.70853	24.3065	23.2437	4.83846	23.7751	4.91377
Gm43403	Gm43403	1	1	5.48201	4.33655	1	4.90928	4.90928
Gm38227	Gm38227	1	1	5.48201	4.33655	1	4.90928	4.90928
Gm45540	Gm45540	1	1	5.48201	4.33655	1	4.90928	4.90928
Gm45470	Gm45470	1	1	5.48201	4.33655	1	4.90928	4.90928
Plekhg4	Plekhg4	1	1	5.48201	4.33655	1	4.90928	4.90928
Gm44616	Gm44616	1	1	5.48201	4.33655	1	4.90928	4.90928
5830462O15Rik	5830462O15Rik	1	1	5.48201	4.33655	1	4.90928	4.90928
Rp1l1	Rp1l1	1	1	5.48201	4.33655	1	4.90928	4.90928
Tubg2	Tubg2	2.93678	2.11809	17.1352	7.67311	2.52743	12.4042	4.90782
Mycn	Mycn	4.87355	1	14.446	14.3462	2.93678	14.3961	4.90202
Sh2d3c	Sh2d3c	1	3.23618	10.8604	9.89748	2.11809	10.379	4.90015
Gm11541	Gm11541	1	1	1	8.78529	1	4.89265	4.89265
Gm26830	Gm26830	1	1	1	8.78529	1	4.89265	4.89265
Kcnd2	Kcnd2	1	1	1	8.78529	1	4.89265	4.89265
Thrsp	Thrsp	1	1	1	8.78529	1	4.89265	4.89265
Lrit3	Lrit3	1	1	1	8.78529	1	4.89265	4.89265
Chrm5	Chrm5	1	1	1	8.78529	1	4.89265	4.89265
Serpinb11	Serpinb11	2.93678	3.23618	13.5496	16.5706	3.08648	15.0601	4.87939
Gm43999	Gm43999	1	2.11809	6.37842	8.78529	1.55904	7.58185	4.86314
AC163357.1	AC163357.1	1	5.47235	22.5137	8.78529	3.23618	15.6495	4.83579
AC117245.4	AC117245.4	1.96839	2.11809	15.3424	4.33655	2.04324	9.8395	4.81564
Lrrc51	Lrrc51	1.96839	2.11809	15.3424	4.33655	2.04324	9.8395	4.81564
Wnt7a	Wnt7a	1.96839	1	5.48201	8.78529	1.48419	7.13365	4.80642
4732491K20Rik	4732491K20Rik	1	1	6.37842	3.22437	1	4.80139	4.80139
Gm4189	Gm4189	1	1	6.37842	3.22437	1	4.80139	4.80139
Fads3	Fads3	1	1	6.37842	3.22437	1	4.80139	4.80139
Fsbp	Fsbp	1	1	1.8964	7.67311	1	4.78476	4.78476
Fyb	Fyb	1	1	1.8964	7.67311	1	4.78476	4.78476
Gm37600	Gm37600	1	1	1.8964	7.67311	1	4.78476	4.78476
Mmp9	Mmp9	3.90516	2.11809	24.3065	4.33655	3.01163	14.3215	4.75541
Flnc	Flnc	1.96839	5.47235	15.3424	19.9071	3.72037	17.6248	4.73738
Gm6525	Gm6525	1	2.11809	8.17122	6.56092	1.55904	7.36607	4.72474
Tfap4	Tfap4	2.93678	2.11809	11.7568	12.1218	2.52743	11.9393	4.7239
Eri2	Eri2	9.71549	5.47235	44.0273	27.6924	7.59392	35.8599	4.72218
Rnf223	Rnf223	15.5258	21.1256	83.4691	88.8626	18.3257	86.1658	4.70191
Fcgr1	Fcgr1	1	3.23618	9.96403	9.89748	2.11809	9.93075	4.68855
Nxpe3	Nxpe3	1.96839	3.23618	18.9281	5.44874	2.60228	12.1884	4.68373
AC163038.1	AC163038.1	1	1	2.79281	6.56092	1	4.67686	4.67686
AC158987.1	AC158987.1	1	1	2.79281	6.56092	1	4.67686	4.67686
4932442E05Rik	4932442E05Rik	1	1	2.79281	6.56092	1	4.67686	4.67686
2700046G09Rik	2700046G09Rik	1	1	2.79281	6.56092	1	4.67686	4.67686
4632415L05Rik	4632415L05Rik	3.90516	2.11809	17.1352	11.0097	3.01163	14.0725	4.67271
Ttc12	Ttc12	1.96839	1	11.7568	2.11218	1.48419	6.93451	4.67224
Cpn1	Cpn1	17.4626	2.11809	59.2662	32.1412	9.79034	45.7037	4.66824
Zscan10	Zscan10	3.90516	2.11809	12.6532	15.4584	3.01163	14.0558	4.66719
Sptbn4	Sptbn4	1	2.11809	13.5496	1	1.55904	7.27482	4.66621
Swsap1	Swsap1	1.96839	2.11809	13.5496	5.44874	2.04324	9.49919	4.64909
Gm37553	Gm37553	3.90516	1	11.7568	11.0097	2.45258	11.3832	4.64133
Myo15b	Myo15b	1.96839	7.70853	26.0993	18.795	4.83846	22.4471	4.63931
BC048403	BC048403	1	8.82661	23.4101	22.1315	4.91331	22.7708	4.63451
Gm45126	Gm45126	1.96839	1	8.17122	5.44874	1.48419	6.80998	4.58834
4930438A08Rik	4930438A08Rik	1	1	8.17122	1	1	4.58561	4.58561
D930015M05Rik	D930015M05Rik	1	1	8.17122	1	1	4.58561	4.58561
2700068H02Rik	2700068H02Rik	1	1	8.17122	1	1	4.58561	4.58561
Gm10384	Gm10384	1	1	8.17122	1	1	4.58561	4.58561
Htr1d	Htr1d	1	1	8.17122	1	1	4.58561	4.58561
Ccna1	Ccna1	1	1	8.17122	1	1	4.58561	4.58561
4831440E17Rik	4831440E17Rik	1	1	3.68921	5.44874	1	4.56897	4.56897
A830012C17Rik	A830012C17Rik	1	1	3.68921	5.44874	1	4.56897	4.56897
Lnp1	Lnp1	1	1	3.68921	5.44874	1	4.56897	4.56897
AC164437.5	AC164437.5	1	1	3.68921	5.44874	1	4.56897	4.56897
Gm6981	Gm6981	1	1	3.68921	5.44874	1	4.56897	4.56897
Gm12741	Gm12741	1	1	3.68921	5.44874	1	4.56897	4.56897
Peg10	Peg10	2.93678	2.11809	15.3424	7.67311	2.52743	11.5078	4.55315
2610306O10Rik	2610306O10Rik	2.93678	15.5351	61.9554	22.1315	9.23596	42.0434	4.55215
Gm36638	Gm36638	2.93678	4.35426	19.8245	13.234	3.64552	16.5292	4.53413
Gm12915	Gm12915	1	3.23618	8.17122	11.0097	2.11809	9.59044	4.52788
4930517G19Rik	4930517G19Rik	19.3994	26.716	123.807	84.4139	23.0577	104.111	4.51522
Hsph1	Hsph1	485.194	514.202	1960.54	2544.57	499.698	2252.55	4.50782
BC051019	BC051019	1.96839	3.23618	13.5496	9.89748	2.60228	11.7236	4.50511
Creb3l4	Creb3l4	3.90516	1	9.96403	12.1218	2.45258	11.0429	4.50258
Il1bos	Il1bos	1	2.11809	1.8964	12.1218	1.55904	7.00912	4.49578
Gm15234	Gm15234	1.96839	4.35426	11.7568	16.5706	3.16133	14.1637	4.48031
Gm26896	Gm26896	1	1	4.58561	4.33655	1	4.46108	4.46108
Nckap1l	Nckap1l	1	1	4.58561	4.33655	1	4.46108	4.46108
Gm6407	Gm6407	1	1	4.58561	4.33655	1	4.46108	4.46108
Cd4	Cd4	1	1	4.58561	4.33655	1	4.46108	4.46108
Tulp1	Tulp1	1	1	4.58561	4.33655	1	4.46108	4.46108
Ccl2	Ccl2	1.96839	4.35426	3.68921	24.3559	3.16133	14.0225	4.43565
4732487G21Rik	4732487G21Rik	1	2.11809	2.79281	11.0097	1.55904	6.90123	4.42658
4930404I05Rik	4930404I05Rik	1	2.11809	2.79281	11.0097	1.55904	6.90123	4.42658
4933424N20Rik	4933424N20Rik	1	3.23618	9.96403	8.78529	2.11809	9.37466	4.426
4732471J01Rik	4732471J01Rik	4.87355	2.11809	20.7209	9.89748	3.49582	15.3092	4.37928
P2rx7	P2rx7	10.6839	17.7713	60.1626	64.3945	14.2276	62.2786	4.37731
Fam161a	Fam161a	7.77871	4.35426	38.6489	14.3462	6.06649	26.4976	4.36786
Kcnc4	Kcnc4	3.90516	1	8.17122	13.234	2.45258	10.7026	4.36382
Spata33	Spata33	1.96839	1	6.37842	6.56092	1.48419	6.46967	4.35905
Gm45464	Gm45464	1.96839	1	6.37842	6.56092	1.48419	6.46967	4.35905
Gm43127	Gm43127	1.96839	1	6.37842	6.56092	1.48419	6.46967	4.35905
Gm42521	Gm42521	1	1	5.48201	3.22437	1	4.35319	4.35319
Igfn1	Igfn1	1	1	5.48201	3.22437	1	4.35319	4.35319
4930558J22Rik	4930558J22Rik	1	1	5.48201	3.22437	1	4.35319	4.35319
Armcx2	Armcx2	1	1	1	7.67311	1	4.33655	4.33655
Gm16270	Gm16270	1	1	1	7.67311	1	4.33655	4.33655
Gm42878	Gm42878	1	1	1	7.67311	1	4.33655	4.33655
Gm39375	Gm39375	1	1	1	7.67311	1	4.33655	4.33655
Coro1a	Coro1a	1	1	1	7.67311	1	4.33655	4.33655
Gm16090	Gm16090	1	3.23618	7.27482	11.0097	2.11809	9.14224	4.31627
Gm9725	Gm9725	2.93678	5.47235	20.7209	15.4584	4.20456	18.0896	4.30238
4933401H06Rik	4933401H06Rik	1	2.11809	9.06762	4.33655	1.55904	6.70209	4.29885
Gm44401	Gm44401	1	2.11809	4.58561	8.78529	1.55904	6.68545	4.28817
Gm12324	Gm12324	1	2.11809	4.58561	8.78529	1.55904	6.68545	4.28817
Gm26707	Gm26707	1.96839	1	7.27482	5.44874	1.48419	6.36178	4.28635
Spata20	Spata20	3.90516	1	9.96403	11.0097	2.45258	10.4868	4.27584
Cyba	Cyba	1	1	6.37842	2.11218	1	4.2453	4.2453
Rpl30-ps5	Rpl30-ps5	1	1	6.37842	2.11218	1	4.2453	4.2453
Gm17315	Gm17315	1	1	6.37842	2.11218	1	4.2453	4.2453
Gm43813	Gm43813	9.71549	6.59044	35.9597	33.2534	8.15296	34.6065	4.24466
Kcnn1	Kcnn1	2.93678	6.59044	21.6173	18.795	4.76361	20.2061	4.24177
Ceacam1	Ceacam1	1	1	1.8964	6.56092	1	4.22866	4.22866
Nme3	Nme3	1	1	1.8964	6.56092	1	4.22866	4.22866
Gm24400	Gm24400	1	1	1.8964	6.56092	1	4.22866	4.22866
Fam71a	Fam71a	44.5774	33.4245	197.312	132.238	39.001	164.775	4.22489
Gm13986	Gm13986	1	2.11809	5.48201	7.67311	1.55904	6.57756	4.21897
Sspn	Sspn	4.87355	1	12.6532	12.1218	2.93678	12.3875	4.21808
2010109I03Rik	2010109I03Rik	1.96839	1	8.17122	4.33655	1.48419	6.25389	4.21366
Gm12279	Gm12279	1.96839	1	8.17122	4.33655	1.48419	6.25389	4.21366
Gm6745	Gm6745	2.93678	3.23618	12.6532	13.234	3.08648	12.9436	4.19366
Gm26788	Gm26788	32.9568	30.0703	148.906	114.443	31.5135	131.675	4.17835
Cyr61	Cyr61	1766.37	1338.23	6004.21	6857.62	1552.3	6430.91	4.14282
Fibin	Fibin	2.93678	1	10.8604	5.44874	1.96839	8.15458	4.14277
1810024B03Rik	1810024B03Rik	1.96839	1	9.06762	3.22437	1.48419	6.146	4.14097
Zfp108	Zfp108	1	1	7.27482	1	1	4.13741	4.13741
CT009550.1	CT009550.1	1	1	7.27482	1	1	4.13741	4.13741
Glp2r	Glp2r	1	1	7.27482	1	1	4.13741	4.13741
Rnu1a1	Rnu1a1	1	1	7.27482	1	1	4.13741	4.13741
4930511A02Rik	4930511A02Rik	1	1	7.27482	1	1	4.13741	4.13741
CT009556.2	CT009556.2	1	1	7.27482	1	1	4.13741	4.13741
Fam227a	Fam227a	1	1	7.27482	1	1	4.13741	4.13741
Slc9b2	Slc9b2	1.96839	1	4.58561	7.67311	1.48419	6.12936	4.12976
Ppp1r16b	Ppp1r16b	1	1	2.79281	5.44874	1	4.12077	4.12077
Spata5l1	Spata5l1	1	1	2.79281	5.44874	1	4.12077	4.12077
Hoxb2	Hoxb2	1	1	2.79281	5.44874	1	4.12077	4.12077
1700065J18Rik	1700065J18Rik	1	1	2.79281	5.44874	1	4.12077	4.12077
Arhgef9	Arhgef9	1	1	2.79281	5.44874	1	4.12077	4.12077
Slc34a3	Slc34a3	3.90516	2.11809	8.17122	16.5706	3.01163	12.3709	4.10772
Gm24474	Gm24474	2.93678	2.11809	10.8604	9.89748	2.52743	10.379	4.10652
Crtac1	Crtac1	1	2.11809	11.7568	1	1.55904	6.37842	4.09124
Gm14382	Gm14382	1	2.11809	7.27482	5.44874	1.55904	6.36178	4.08056
Gm44417	Gm44417	2.93678	1	2.79281	13.234	1.96839	8.01342	4.07106
Arhgap30	Arhgap30	6.81033	3.23618	24.3065	16.5706	5.02325	20.4385	4.06879
Prkcq	Prkcq	1	9.9447	33.2705	11.0097	5.47235	22.1401	4.04581
Zfp688	Zfp688	7.77871	5.47235	31.4777	22.1315	6.62553	26.8046	4.04565
Gm12944	Gm12944	3.90516	3.23618	18.9281	9.89748	3.57067	14.4128	4.03643
Ap1s3	Ap1s3	2.93678	1	8.17122	7.67311	1.96839	7.92217	4.0247
Gm31793	Gm31793	1	1	3.68921	4.33655	1	4.01288	4.01288
Gm42847	Gm42847	1	1	3.68921	4.33655	1	4.01288	4.01288
Gm42471	Gm42471	1	1	3.68921	4.33655	1	4.01288	4.01288
Gm37214	Gm37214	1	1	3.68921	4.33655	1	4.01288	4.01288
Col19a1	Col19a1	1	1	3.68921	4.33655	1	4.01288	4.01288
Gm37935	Gm37935	1	1	3.68921	4.33655	1	4.01288	4.01288
Gm44509	Gm44509	1	1	3.68921	4.33655	1	4.01288	4.01288
Grm2	Grm2	1	1	3.68921	4.33655	1	4.01288	4.01288
Oasl2	Oasl2	1	1	3.68921	4.33655	1	4.01288	4.01288
Rab3a	Rab3a	6.81033	11.0628	39.5453	32.1412	8.93656	35.8432	4.01086
Gm11249	Gm11249	1.96839	1	6.37842	5.44874	1.48419	5.91358	3.98437
Kcnh6	Kcnh6	1.96839	2.11809	1.8964	14.3462	2.04324	8.12131	3.97473
C2	C2	4.87355	4.35426	23.4101	13.234	4.61391	18.3221	3.97105
Chrm1	Chrm1	6.81033	1	19.8245	11.0097	3.90516	15.4171	3.94787
Ckm	Ckm	6.81033	1	15.3424	15.4584	3.90516	15.4004	3.94361
Pcdhga3	Pcdhga3	1	2.11809	9.06762	3.22437	1.55904	6.146	3.94216
Sprr2k	Sprr2k	1.96839	2.11809	11.7568	4.33655	2.04324	8.04669	3.93821
Txnip	Txnip	249.876	234.68	1071.3	832.914	242.278	952.11	3.92982
Ptk6	Ptk6	2.93678	1	9.96403	5.44874	1.96839	7.70638	3.91507
Gm40655	Gm40655	2.93678	4.35426	10.8604	17.6828	3.64552	14.2716	3.91483
Dgat2l6	Dgat2l6	1	1	4.58561	3.22437	1	3.90499	3.90499
Gm5627	Gm5627	1	1	4.58561	3.22437	1	3.90499	3.90499
4930426I24Rik	4930426I24Rik	1	1	4.58561	3.22437	1	3.90499	3.90499
AC159264.1	AC159264.1	1	1	4.58561	3.22437	1	3.90499	3.90499
AC108858.2	AC108858.2	1	1	4.58561	3.22437	1	3.90499	3.90499
Rep15	Rep15	1	1	4.58561	3.22437	1	3.90499	3.90499
S100a8	S100a8	1.96839	1	2.79281	8.78529	1.48419	5.78905	3.90047
Gm26785	Gm26785	3.90516	2.11809	13.5496	9.89748	3.01163	11.7236	3.89277
Katnal1	Katnal1	2.93678	5.47235	17.1352	15.4584	4.20456	16.2968	3.87599
8430408G22Rik	8430408G22Rik	3.90516	6.59044	16.2388	24.3559	5.2478	20.2974	3.86778
Gm4319	Gm4319	1	2.11809	5.48201	6.56092	1.55904	6.02147	3.86228
Acan	Acan	1	3.23618	15.3424	1	2.11809	8.17122	3.85783
9930024M15Rik	9930024M15Rik	1.96839	3.23618	9.06762	11.0097	2.60228	10.0386	3.85763
Gm18301	Gm18301	1	2.11809	1	11.0097	1.55904	6.00483	3.85161
Pcdh20	Pcdh20	12.6207	1	27.8921	24.3559	6.81033	26.124	3.83594
Grin1	Grin1	1	6.59044	22.5137	6.56092	3.79522	14.5373	3.83042
Gm45757	Gm45757	1.96839	1	3.68921	7.67311	1.48419	5.68116	3.82777
Naa11	Naa11	3.90516	1	9.96403	8.78529	2.45258	9.37466	3.82236
Gm16087	Gm16087	1.96839	2.11809	4.58561	11.0097	2.04324	7.79764	3.81631
Gm45481	Gm45481	1.96839	3.23618	9.96403	9.89748	2.60228	9.93075	3.81617
A830036E02Rik	A830036E02Rik	1	2.11809	10.8604	1	1.55904	5.93022	3.80375
Brca1	Brca1	6.81033	5.47235	27.8921	18.795	6.14134	23.3435	3.80105
Gm21893	Gm21893	1	1	5.48201	2.11218	1	3.7971	3.7971
A930007I19Rik	A930007I19Rik	1	1	5.48201	2.11218	1	3.7971	3.7971
Gstm3	Gstm3	1	1	5.48201	2.11218	1	3.7971	3.7971
Il23a	Il23a	1	1	5.48201	2.11218	1	3.7971	3.7971
Gm38372	Gm38372	1	1	5.48201	2.11218	1	3.7971	3.7971
Tmem200b	Tmem200b	1	1	5.48201	2.11218	1	3.7971	3.7971
Gm26674	Gm26674	1	1	5.48201	2.11218	1	3.7971	3.7971
Gm12474	Gm12474	1	1	5.48201	2.11218	1	3.7971	3.7971
Gm42683	Gm42683	1	1	5.48201	2.11218	1	3.7971	3.7971
Smim5	Smim5	11.6523	5.47235	39.5453	25.4681	8.56231	32.5067	3.79649
Inca1	Inca1	2.93678	2.11809	8.17122	11.0097	2.52743	9.59044	3.79454
Ttbk1	Ttbk1	2.93678	2.11809	8.17122	11.0097	2.52743	9.59044	3.79454
Ticrr	Ticrr	3.90516	11.0628	36.8561	19.9071	7.48398	28.3816	3.79232
Mpig6b	Mpig6b	5.84194	11.0628	44.0273	19.9071	8.45236	31.9672	3.78205
Il1f10	Il1f10	1	1	1	6.56092	1	3.78046	3.78046
Fndc8	Fndc8	1	1	1	6.56092	1	3.78046	3.78046
Fancf	Fancf	1	1	1	6.56092	1	3.78046	3.78046
Fam107a	Fam107a	1	1	1	6.56092	1	3.78046	3.78046
Gm11587	Gm11587	1	1	1	6.56092	1	3.78046	3.78046
Gm4640	Gm4640	1	1	1	6.56092	1	3.78046	3.78046
Gm24258	Gm24258	1	1	1	6.56092	1	3.78046	3.78046
Myh7	Myh7	1	1	1	6.56092	1	3.78046	3.78046
Epha10	Epha10	1	1	1	6.56092	1	3.78046	3.78046
Gm45576	Gm45576	1	1	1	6.56092	1	3.78046	3.78046
Ptprt	Ptprt	1	1	1	6.56092	1	3.78046	3.78046
Kcnip3	Kcnip3	1	1	1	6.56092	1	3.78046	3.78046
Medag	Medag	1	1	1	6.56092	1	3.78046	3.78046
Tceal1	Tceal1	4.87355	2.11809	19.8245	6.56092	3.49582	13.1927	3.77385
A730036I17Rik	A730036I17Rik	1.96839	1	9.06762	2.11218	1.48419	5.5899	3.76629
Wdr86	Wdr86	9.71549	14.4171	47.6129	43.263	12.0663	45.438	3.7657
Hoga1	Hoga1	5.84194	2.11809	23.4101	6.56092	3.98001	14.9855	3.76519
2810021J22Rik	2810021J22Rik	4.87355	4.35426	13.5496	21.0193	4.61391	17.2845	3.74617
Gm20627	Gm20627	3.90516	5.47235	25.2029	9.89748	4.68876	17.5502	3.74303
Gm37352	Gm37352	17.4626	28.9522	111.258	62.1702	23.2074	86.7138	3.73648
Amigo2	Amigo2	2.93678	3.23618	19.8245	3.22437	3.08648	11.5244	3.73384
Egf	Egf	2.93678	1	3.68921	11.0097	1.96839	7.34944	3.73373
Rn7sk	Rn7sk	4.87355	18.8894	61.9554	26.5802	11.8815	44.2678	3.72578
Apobr	Apobr	1	2.11809	7.27482	4.33655	1.55904	5.80569	3.72388
Map4k1	Map4k1	1.96839	2.11809	1.8964	13.234	2.04324	7.56522	3.70256
Magi1	Magi1	63.9452	59.1406	240.34	214.539	61.5429	227.439	3.69563
Gm38155	Gm38155	1	1	6.37842	1	1	3.68921	3.68921
9330111N05Rik	9330111N05Rik	1	1	6.37842	1	1	3.68921	3.68921
Gm36995	Gm36995	1	1	6.37842	1	1	3.68921	3.68921
Ccbe1	Ccbe1	1	1	6.37842	1	1	3.68921	3.68921
CT030238.4	CT030238.4	1	1	6.37842	1	1	3.68921	3.68921
Gpx2-ps1	Gpx2-ps1	1	1	6.37842	1	1	3.68921	3.68921
A530072M11Rik	A530072M11Rik	1.96839	1	5.48201	5.44874	1.48419	5.46538	3.68239
Gm28857	Gm28857	1.96839	1	5.48201	5.44874	1.48419	5.46538	3.68239
Gm13117	Gm13117	1	1	1.8964	5.44874	1	3.67257	3.67257
Gm6304	Gm6304	1	1	1.8964	5.44874	1	3.67257	3.67257
Gm25986	Gm25986	1	1	1.8964	5.44874	1	3.67257	3.67257
Gm38010	Gm38010	1	1	1.8964	5.44874	1	3.67257	3.67257
Il18rap	Il18rap	1	1	1.8964	5.44874	1	3.67257	3.67257
Gm10762	Gm10762	1	1	1.8964	5.44874	1	3.67257	3.67257
4633401B06Rik	4633401B06Rik	1	1	1.8964	5.44874	1	3.67257	3.67257
Rpl30-ps2	Rpl30-ps2	1	1	1.8964	5.44874	1	3.67257	3.67257
Fam198b	Fam198b	1	1	1.8964	5.44874	1	3.67257	3.67257
Abcc6	Abcc6	1.96839	1	1	9.89748	1.48419	5.44874	3.67118
Rasd1	Rasd1	15.5258	35.6607	103.19	84.4139	25.5933	93.8019	3.6651
2310003N18Rik	2310003N18Rik	3.90516	2.11809	5.48201	16.5706	3.01163	11.0263	3.66125
Ntn4	Ntn4	1	2.11809	8.17122	3.22437	1.55904	5.6978	3.65467
9330175E14Rik	9330175E14Rik	2.93678	2.11809	1.8964	16.5706	2.52743	9.23349	3.65331
Gm17275	Gm17275	30.0516	15.5351	94.2259	72.1798	22.7934	83.2029	3.65031
D430018E03Rik	D430018E03Rik	15.5258	5.47235	37.7525	38.8143	10.4991	38.2834	3.64636
Kncn	Kncn	1	3.23618	9.96403	5.44874	2.11809	7.70638	3.63837
A930005N03Rik	A930005N03Rik	5.84194	4.35426	21.6173	15.4584	5.0981	18.5378	3.63622
Etnk2	Etnk2	3.90516	2.11809	10.8604	11.0097	3.01163	10.935	3.63094
D730003I15Rik	D730003I15Rik	8.7471	6.59044	32.3741	23.2437	7.66877	27.8089	3.62625
Srrm4	Srrm4	7.77871	12.1809	36.8561	35.4777	9.9798	36.1669	3.62401
Gm9903	Gm9903	1	5.47235	9.06762	14.3462	3.23618	11.7069	3.61752
Mthfs	Mthfs	4.87355	2.11809	19.8245	5.44874	3.49582	12.6366	3.61477
Henmt1	Henmt1	1.96839	1	6.37842	4.33655	1.48419	5.35749	3.60969
8430422M14Rik	8430422M14Rik	1.96839	1	6.37842	4.33655	1.48419	5.35749	3.60969
Amotl2	Amotl2	114.301	126.226	439.341	428.079	120.264	433.71	3.60633
C1rl	C1rl	1.96839	2.11809	8.17122	6.56092	2.04324	7.36607	3.6051
Slc38a8	Slc38a8	1.96839	1	1.8964	8.78529	1.48419	5.34085	3.59848
Fam166a	Fam166a	10.6839	5.47235	40.4417	17.6828	8.07811	29.0622	3.59765
Acta2	Acta2	1.96839	7.70853	12.6532	22.1315	4.83846	17.3924	3.59461
Gm44891	Gm44891	5.84194	2.11809	19.8245	8.78529	3.98001	14.3049	3.59418
Pcdhga9	Pcdhga9	2.93678	4.35426	11.7568	14.3462	3.64552	13.0515	3.58016
Rpl21-ps14	Rpl21-ps14	1	3.23618	6.37842	8.78529	2.11809	7.58185	3.57958
Lrrn2	Lrrn2	1	2.11809	4.58561	6.56092	1.55904	5.57327	3.5748
Myzap	Myzap	1	2.11809	4.58561	6.56092	1.55904	5.57327	3.5748
Tm6sf2	Tm6sf2	1	2.11809	4.58561	6.56092	1.55904	5.57327	3.5748
Klhl42	Klhl42	9.71549	13.299	42.2345	39.9265	11.5072	41.0805	3.56997
Cyp2a5	Cyp2a5	2.93678	1	6.37842	7.67311	1.96839	7.02576	3.5693
2900035J10Rik	2900035J10Rik	1	1	2.79281	4.33655	1	3.56468	3.56468
Ankrd53	Ankrd53	1	1	2.79281	4.33655	1	3.56468	3.56468
Gm12182	Gm12182	1	1	2.79281	4.33655	1	3.56468	3.56468
Gm14053	Gm14053	1	1	2.79281	4.33655	1	3.56468	3.56468
Gm16984	Gm16984	1	1	2.79281	4.33655	1	3.56468	3.56468
Mrgprh	Mrgprh	1	1	2.79281	4.33655	1	3.56468	3.56468
1520401A03Rik	1520401A03Rik	1	1	2.79281	4.33655	1	3.56468	3.56468
Dlx6os1	Dlx6os1	1	1	2.79281	4.33655	1	3.56468	3.56468
Gm11742	Gm11742	1	1	2.79281	4.33655	1	3.56468	3.56468
Hcar1	Hcar1	1	1	2.79281	4.33655	1	3.56468	3.56468
Ppef1	Ppef1	1	1	2.79281	4.33655	1	3.56468	3.56468
Rimbp3	Rimbp3	1	1	2.79281	4.33655	1	3.56468	3.56468
BC028528	BC028528	1	1	2.79281	4.33655	1	3.56468	3.56468
Gm24447	Gm24447	1	1	2.79281	4.33655	1	3.56468	3.56468
Bambi-ps1	Bambi-ps1	1	1	2.79281	4.33655	1	3.56468	3.56468
Gm7653	Gm7653	1	1	2.79281	4.33655	1	3.56468	3.56468
Gm38144	Gm38144	1	1	2.79281	4.33655	1	3.56468	3.56468
Gm15473	Gm15473	1	1	2.79281	4.33655	1	3.56468	3.56468
Krt87	Krt87	1	1	2.79281	4.33655	1	3.56468	3.56468
Srgap1	Srgap1	1.96839	2.11809	9.06762	5.44874	2.04324	7.25818	3.55229
2310015A10Rik	2310015A10Rik	2.93678	5.47235	9.96403	19.9071	4.20456	14.9356	3.55223
4921507P07Rik	4921507P07Rik	2.93678	3.23618	10.8604	11.0097	3.08648	10.935	3.54289
Gbp7	Gbp7	2.93678	2.11809	13.5496	4.33655	2.52743	8.9431	3.53841
Gm44867	Gm44867	1.96839	1	7.27482	3.22437	1.48419	5.24959	3.537
Gm43423	Gm43423	1.96839	1	7.27482	3.22437	1.48419	5.24959	3.537
Nlrp1b	Nlrp1b	4.87355	4.35426	17.1352	15.4584	4.61391	16.2968	3.53211
4931422A03Rik	4931422A03Rik	5.84194	2.11809	12.6532	15.4584	3.98001	14.0558	3.5316
Rgs16	Rgs16	8.7471	12.1809	30.5813	43.263	10.464	36.9222	3.5285
P2rx3	P2rx3	1.96839	1	2.79281	7.67311	1.48419	5.23296	3.52579
Dysf	Dysf	1.96839	1	2.79281	7.67311	1.48419	5.23296	3.52579
Fzd4	Fzd4	1	2.11809	9.96403	1	1.55904	5.48201	3.51627
Pcdhgb4	Pcdhgb4	2.93678	1	7.27482	6.56092	1.96839	6.91787	3.51449
Mkln1os	Mkln1os	1	2.11809	5.48201	5.44874	1.55904	5.46538	3.50559
Krt4	Krt4	1	2.11809	1	9.89748	1.55904	5.44874	3.49492
Atp8b5	Atp8b5	3.90516	1	2.79281	14.3462	2.45258	8.56951	3.49408
Dapk3	Dapk3	7.77871	6.59044	18.0317	32.1412	7.18458	25.0864	3.4917
CT009757.3	CT009757.3	14.5574	9.9447	56.577	28.8046	12.2511	42.6908	3.48466
Trim38	Trim38	1	3.23618	8.17122	6.56092	2.11809	7.36607	3.4777
Golga7b	Golga7b	19.3994	18.8894	85.2619	47.7118	19.1444	66.4868	3.47291
Gm26551	Gm26551	3.90516	8.82661	19.8245	24.3559	6.36589	22.0902	3.47008
Gm15483	Gm15483	1.96839	1	8.17122	2.11218	1.48419	5.1417	3.46431
Myo1h	Myo1h	1.96839	1	8.17122	2.11218	1.48419	5.1417	3.46431
6030408B16Rik	6030408B16Rik	1.96839	1	8.17122	2.11218	1.48419	5.1417	3.46431
Gm36938	Gm36938	9.71549	14.4171	45.8201	37.7021	12.0663	41.7611	3.46098
Ecscr	Ecscr	1	1	3.68921	3.22437	1	3.45679	3.45679
9230116N13Rik	9230116N13Rik	1	1	3.68921	3.22437	1	3.45679	3.45679
AC133496.1	AC133496.1	1	1	3.68921	3.22437	1	3.45679	3.45679
C330011M18Rik	C330011M18Rik	1	1	3.68921	3.22437	1	3.45679	3.45679
Gm12397	Gm12397	1	1	3.68921	3.22437	1	3.45679	3.45679
Gm23183	Gm23183	1	1	3.68921	3.22437	1	3.45679	3.45679
Gm6226	Gm6226	1	1	3.68921	3.22437	1	3.45679	3.45679
Hey2	Hey2	1	1	3.68921	3.22437	1	3.45679	3.45679
Fam124b	Fam124b	1	1	3.68921	3.22437	1	3.45679	3.45679
Olfr467	Olfr467	1	1	3.68921	3.22437	1	3.45679	3.45679
Rd3	Rd3	1	1	3.68921	3.22437	1	3.45679	3.45679
CT030170.4	CT030170.4	1	1	3.68921	3.22437	1	3.45679	3.45679
Gm12396	Gm12396	1.96839	1	3.68921	6.56092	1.48419	5.12507	3.4531
Dnajb7	Dnajb7	1.96839	1	3.68921	6.56092	1.48419	5.12507	3.4531
Gm10463	Gm10463	1.96839	1	3.68921	6.56092	1.48419	5.12507	3.4531
Smpd5	Smpd5	7.77871	4.35426	20.7209	21.0193	6.06649	20.8701	3.44023
Gsg1	Gsg1	1	2.11809	6.37842	4.33655	1.55904	5.35749	3.43639
Tgif2	Tgif2	1.96839	2.11809	1.8964	12.1218	2.04324	7.00912	3.4304
Gm5979	Gm5979	10.6839	22.2437	76.2978	36.5899	16.4638	56.4439	3.42837
Prss57	Prss57	1	3.23618	9.06762	5.44874	2.11809	7.25818	3.42676
Gm46212	Gm46212	2.93678	4.35426	7.27482	17.6828	3.64552	12.4788	3.42305
D6Ertd527e	D6Ertd527e	4.87355	17.7713	25.2029	52.1605	11.3224	38.6817	3.41638
4732490B19Rik	4732490B19Rik	3.90516	4.35426	12.6532	15.4584	4.12971	14.0558	3.40358
Gm20531	Gm20531	2.93678	1	4.58561	8.78529	1.96839	6.68545	3.39641
Gm7461	Gm7461	2.93678	1	4.58561	8.78529	1.96839	6.68545	3.39641
AC158355.1	AC158355.1	37.7987	51.3139	185.659	116.667	44.5563	151.163	3.39263
Dtd2	Dtd2	8.7471	9.9447	27.8921	35.4777	9.3459	31.6849	3.39025
Rfpl4	Rfpl4	1.96839	3.23618	9.96403	7.67311	2.60228	8.81857	3.38878
Rgs7bp	Rgs7bp	1.96839	1	4.58561	5.44874	1.48419	5.01717	3.3804
9230102O04Rik	9230102O04Rik	1.96839	1	4.58561	5.44874	1.48419	5.01717	3.3804
Gm7065	Gm7065	1.96839	1	4.58561	5.44874	1.48419	5.01717	3.3804
Arxes2	Arxes2	3.90516	2.11809	17.1352	3.22437	3.01163	10.1798	3.38017
Plekhf1	Plekhf1	7.77871	8.82661	30.5813	25.4681	8.30266	28.0247	3.37538
Gm19327	Gm19327	4.87355	12.1809	43.1309	14.3462	8.52721	28.7386	3.37022
Tesc	Tesc	1	3.23618	5.48201	8.78529	2.11809	7.13365	3.36797
1700022N22Rik	1700022N22Rik	1	2.11809	7.27482	3.22437	1.55904	5.24959	3.36719
Zbtb32	Zbtb32	1	8.82661	19.8245	13.234	4.91331	16.5292	3.36418
Arrdc3	Arrdc3	53.2929	104.982	306.673	225.661	79.1376	266.167	3.36335
Gm36931	Gm36931	2.93678	2.11809	12.6532	4.33655	2.52743	8.49489	3.36108
Gm12345	Gm12345	1	3.23618	1	13.234	2.11809	7.11702	3.36011
Gm10501	Gm10501	1	2.11809	2.79281	7.67311	1.55904	5.23296	3.35652
Gm44275	Gm44275	1	1	4.58561	2.11218	1	3.3489	3.3489
2310039L15Rik	2310039L15Rik	1	1	4.58561	2.11218	1	3.3489	3.3489
AC125484.1	AC125484.1	1	1	4.58561	2.11218	1	3.3489	3.3489
AC154436.1	AC154436.1	1	1	4.58561	2.11218	1	3.3489	3.3489
Gm44006	Gm44006	1	1	4.58561	2.11218	1	3.3489	3.3489
Gm44768	Gm44768	1	1	4.58561	2.11218	1	3.3489	3.3489
Rab17	Rab17	1	1	4.58561	2.11218	1	3.3489	3.3489
Chrng	Chrng	1	1	4.58561	2.11218	1	3.3489	3.3489
Gm13645	Gm13645	1	1	4.58561	2.11218	1	3.3489	3.3489
Gm43142	Gm43142	1	1	4.58561	2.11218	1	3.3489	3.3489
Gm5648	Gm5648	1	1	4.58561	2.11218	1	3.3489	3.3489
Gm5655	Gm5655	1	1	4.58561	2.11218	1	3.3489	3.3489
Tspan11	Tspan11	1	1	4.58561	2.11218	1	3.3489	3.3489
Gm16199	Gm16199	1	1	4.58561	2.11218	1	3.3489	3.3489
Wnt3a	Wnt3a	12.6207	8.82661	44.0273	27.6924	10.7236	35.8599	3.344
Trpv2	Trpv2	7.77871	2.11809	24.3065	8.78529	4.9484	16.5459	3.34368
Uts2r	Uts2r	2.93678	1	5.48201	7.67311	1.96839	6.57756	3.3416
Glyctk	Glyctk	4.87355	1	6.37842	13.234	2.93678	9.80622	3.33911
Adgrf5	Adgrf5	2.93678	1	1	12.1218	1.96839	6.56092	3.33315
Kifc5b	Kifc5b	1.96839	2.11809	8.17122	5.44874	2.04324	6.80998	3.33294
Fam35a	Fam35a	7.77871	4.35426	21.6173	18.795	6.06649	20.2061	3.33078
Tsga10	Tsga10	2.93678	5.47235	18.0317	9.89748	4.20456	13.9646	3.32129
Rapsn	Rapsn	1.96839	1	5.48201	4.33655	1.48419	4.90928	3.30771
Pomc	Pomc	1.96839	1	5.48201	4.33655	1.48419	4.90928	3.30771
Rrad	Rrad	26.1781	4.35426	43.1309	57.7214	15.2662	50.4262	3.30313
Rnu12	Rnu12	1	2.11809	8.17122	2.11218	1.55904	5.1417	3.29799
4930562D21Rik	4930562D21Rik	3.90516	2.11809	9.96403	9.89748	3.01163	9.93075	3.29747
Prelid2	Prelid2	1.96839	1	1	8.78529	1.48419	4.89265	3.2965
Fstl4	Fstl4	1.96839	1	1	8.78529	1.48419	4.89265	3.2965
Gm16907	Gm16907	25.2097	25.5979	104.086	63.2823	25.4038	83.6843	3.29416
Gm26802	Gm26802	1	4.35426	9.96403	7.67311	2.67713	8.81857	3.29404
Tmem8b	Tmem8b	1	4.35426	5.48201	12.1218	2.67713	8.80193	3.28782
Gm44640	Gm44640	1	2.11809	3.68921	6.56092	1.55904	5.12507	3.28731
5730419F03Rik	5730419F03Rik	1	2.11809	3.68921	6.56092	1.55904	5.12507	3.28731
Comp	Comp	1	2.11809	3.68921	6.56092	1.55904	5.12507	3.28731
Gm13562	Gm13562	1	2.11809	3.68921	6.56092	1.55904	5.12507	3.28731
Gm42917	Gm42917	1	2.11809	3.68921	6.56092	1.55904	5.12507	3.28731
Hapln3	Hapln3	6.81033	1	13.5496	12.1218	3.90516	12.8357	3.28686
AC159205.4	AC159205.4	1	3.23618	11.7568	2.11218	2.11809	6.93451	3.27395
Hopxos	Hopxos	1	3.23618	11.7568	2.11218	2.11809	6.93451	3.27395
Tmem151b	Tmem151b	9.71549	9.9447	37.7525	26.5802	9.8301	32.1664	3.27223
Ccdc27	Ccdc27	1.96839	2.11809	4.58561	8.78529	2.04324	6.68545	3.27199
AC134329.1	AC134329.1	2.93678	4.35426	7.27482	16.5706	3.64552	11.9227	3.27051
Amer2	Amer2	1	3.23618	7.27482	6.56092	2.11809	6.91787	3.26609
2300009A05Rik	2300009A05Rik	2.93678	2.11809	5.48201	11.0097	2.52743	8.24584	3.26254
5330406M23Rik	5330406M23Rik	3.90516	2.11809	6.37842	13.234	3.01163	9.80622	3.25612
Tmprss11f	Tmprss11f	8.7471	5.47235	25.2029	21.0193	7.10973	23.1111	3.25063
B3gnt8	B3gnt8	5.84194	15.5351	39.5453	29.9168	10.6885	34.7311	3.24937
Prickle2	Prickle2	8.7471	5.47235	16.2388	29.9168	7.10973	23.0778	3.24595
Cfap97	Cfap97	10.6839	16.6532	56.577	32.1412	13.6686	44.3591	3.24534
Gm43336	Gm43336	3.90516	4.35426	13.5496	13.234	4.12971	13.3918	3.2428
5730422E09Rik	5730422E09Rik	1	1	5.48201	1	1	3.24101	3.24101
Gm16538	Gm16538	1	1	5.48201	1	1	3.24101	3.24101
Gm43494	Gm43494	1	1	5.48201	1	1	3.24101	3.24101
Lrrc4c	Lrrc4c	1	1	5.48201	1	1	3.24101	3.24101
Nfatc4	Nfatc4	1	1	5.48201	1	1	3.24101	3.24101
A230028O05Rik	A230028O05Rik	1	1	5.48201	1	1	3.24101	3.24101
Gm22184	Gm22184	1	1	5.48201	1	1	3.24101	3.24101
AC154806.1	AC154806.1	1	1	5.48201	1	1	3.24101	3.24101
AC156832.2	AC156832.2	1	1	5.48201	1	1	3.24101	3.24101
Dlx6	Dlx6	1	1	5.48201	1	1	3.24101	3.24101
Flg2	Flg2	1	1	5.48201	1	1	3.24101	3.24101
Fmo2	Fmo2	1	1	5.48201	1	1	3.24101	3.24101
Gm10699	Gm10699	1	1	5.48201	1	1	3.24101	3.24101
Gm14234	Gm14234	1	1	5.48201	1	1	3.24101	3.24101
Gm43568	Gm43568	1	1	5.48201	1	1	3.24101	3.24101
Lpcat2b	Lpcat2b	1	1	5.48201	1	1	3.24101	3.24101
Olfr705	Olfr705	1	1	5.48201	1	1	3.24101	3.24101
Otogl	Otogl	1	1	5.48201	1	1	3.24101	3.24101
Pcdha3	Pcdha3	1	1	5.48201	1	1	3.24101	3.24101
Ttll8	Ttll8	1	1	5.48201	1	1	3.24101	3.24101
Hist1h4a	Hist1h4a	1	1	5.48201	1	1	3.24101	3.24101
Grin2c	Grin2c	1	1	5.48201	1	1	3.24101	3.24101
BC043934	BC043934	1	1	5.48201	1	1	3.24101	3.24101
Cela3a	Cela3a	1	1	5.48201	1	1	3.24101	3.24101
Gm14091	Gm14091	1	1	5.48201	1	1	3.24101	3.24101
Gm3830	Gm3830	1	1	5.48201	1	1	3.24101	3.24101
2010110K18Rik	2010110K18Rik	1	1	5.48201	1	1	3.24101	3.24101
Rtl8a	Rtl8a	1	1	5.48201	1	1	3.24101	3.24101
Crip3	Crip3	1	1	5.48201	1	1	3.24101	3.24101
Gm43272	Gm43272	1.96839	1	6.37842	3.22437	1.48419	4.80139	3.23502
Gm18733	Gm18733	1.96839	1	6.37842	3.22437	1.48419	4.80139	3.23502
Gm43273	Gm43273	3.90516	1	8.17122	7.67311	2.45258	7.92217	3.23013
Gm5054	Gm5054	1	2.11809	9.06762	1	1.55904	5.03381	3.22878
CT009757.4	CT009757.4	50.3878	52.432	198.209	133.35	51.4099	165.779	3.22466
Gm28874	Gm28874	1	1	1	5.44874	1	3.22437	3.22437
Ngp	Ngp	1	1	1	5.44874	1	3.22437	3.22437
Anks4b	Anks4b	1	1	1	5.44874	1	3.22437	3.22437
Gm11773	Gm11773	1	1	1	5.44874	1	3.22437	3.22437
4833412K13Rik	4833412K13Rik	1	1	1	5.44874	1	3.22437	3.22437
Gm26509	Gm26509	1	1	1	5.44874	1	3.22437	3.22437
Gm37607	Gm37607	1	1	1	5.44874	1	3.22437	3.22437
AC115291.2	AC115291.2	1	1	1	5.44874	1	3.22437	3.22437
AC125486.1	AC125486.1	1	1	1	5.44874	1	3.22437	3.22437
B830012L14Rik	B830012L14Rik	1	1	1	5.44874	1	3.22437	3.22437
Fbxw22	Fbxw22	1	1	1	5.44874	1	3.22437	3.22437
Gabrb2	Gabrb2	1	1	1	5.44874	1	3.22437	3.22437
Gad1-ps	Gad1-ps	1	1	1	5.44874	1	3.22437	3.22437
Gm12892	Gm12892	1	1	1	5.44874	1	3.22437	3.22437
Gm13914	Gm13914	1	1	1	5.44874	1	3.22437	3.22437
Gm14204	Gm14204	1	1	1	5.44874	1	3.22437	3.22437
Gm15873	Gm15873	1	1	1	5.44874	1	3.22437	3.22437
Gm29707	Gm29707	1	1	1	5.44874	1	3.22437	3.22437
Gm7765	Gm7765	1	1	1	5.44874	1	3.22437	3.22437
Gm8888	Gm8888	1	1	1	5.44874	1	3.22437	3.22437
Mir3474	Mir3474	1	1	1	5.44874	1	3.22437	3.22437
Neurog3	Neurog3	1	1	1	5.44874	1	3.22437	3.22437
Olfr157	Olfr157	1	1	1	5.44874	1	3.22437	3.22437
Parvg	Parvg	1	1	1	5.44874	1	3.22437	3.22437
Rgs8	Rgs8	1	1	1	5.44874	1	3.22437	3.22437
Sgo2b	Sgo2b	1	1	1	5.44874	1	3.22437	3.22437
Trim80	Trim80	1	1	1	5.44874	1	3.22437	3.22437
Zfp575	Zfp575	1	1	1	5.44874	1	3.22437	3.22437
Hapln2	Hapln2	1	1	1	5.44874	1	3.22437	3.22437
Gm13972	Gm13972	1	1	1	5.44874	1	3.22437	3.22437
Gm36640	Gm36640	1	1	1	5.44874	1	3.22437	3.22437
H1foo	H1foo	1	1	1	5.44874	1	3.22437	3.22437
Gm11455	Gm11455	1	1	1	5.44874	1	3.22437	3.22437
Gm13337	Gm13337	1	1	1	5.44874	1	3.22437	3.22437
Gm29036	Gm29036	1	1	1	5.44874	1	3.22437	3.22437
Gm36933	Gm36933	1	1	1	5.44874	1	3.22437	3.22437
Grik5	Grik5	1	1	1	5.44874	1	3.22437	3.22437
Sult2a-ps3	Sult2a-ps3	1	1	1	5.44874	1	3.22437	3.22437
Gm9013	Gm9013	1.96839	1	1.8964	7.67311	1.48419	4.78476	3.22381
Etv3l	Etv3l	1.96839	1	1.8964	7.67311	1.48419	4.78476	3.22381
Tbx1	Tbx1	1.96839	1	1.8964	7.67311	1.48419	4.78476	3.22381
Gm43660	Gm43660	4.87355	3.23618	11.7568	14.3462	4.05486	13.0515	3.21873
Asb1	Asb1	3.90516	3.23618	10.8604	12.1218	3.57067	11.4911	3.2182
Asgr1	Asgr1	1	2.11809	4.58561	5.44874	1.55904	5.01717	3.21811
Gm46123	Gm46123	1	2.11809	4.58561	5.44874	1.55904	5.01717	3.21811
Ttll9	Ttll9	1	2.11809	4.58561	5.44874	1.55904	5.01717	3.21811
Gm18588	Gm18588	1	2.11809	4.58561	5.44874	1.55904	5.01717	3.21811
AC157476.2	AC157476.2	1	2.11809	4.58561	5.44874	1.55904	5.01717	3.21811
2610203C22Rik	2610203C22Rik	1	3.23618	8.17122	5.44874	2.11809	6.80998	3.21515
Gm44220	Gm44220	1	3.23618	8.17122	5.44874	2.11809	6.80998	3.21515
Gm37510	Gm37510	3.90516	5.47235	13.5496	16.5706	4.68876	15.0601	3.21196
Mfng	Mfng	4.87355	7.70853	21.6173	18.795	6.29104	20.2061	3.21189
Syt8	Syt8	5.84194	9.9447	29.6849	21.0193	7.89332	25.3521	3.21184
Eng	Eng	4.87355	9.9447	28.7885	18.795	7.40913	23.7917	3.21114
D6Wsu163e	D6Wsu163e	15.5258	13.299	34.1669	57.7214	14.4124	45.9442	3.18782
Mrm1	Mrm1	22.3045	34.5426	106.776	74.4042	28.4236	90.5899	3.18714
Gm17244	Gm17244	3.90516	1	9.06762	6.56092	2.45258	7.81427	3.18614
Teddm2	Teddm2	1.96839	3.23618	14.446	2.11218	2.60228	8.27911	3.18148
Bivm	Bivm	10.6839	18.8894	57.4734	36.5899	14.7866	47.0316	3.18068
Pdgfb	Pdgfb	17.4626	11.0628	44.0273	46.5996	14.2627	45.3135	3.17706
Pou2f3-rs1	Pou2f3-rs1	1.96839	3.23618	9.96403	6.56092	2.60228	8.26248	3.17509
Gm14921	Gm14921	5.84194	9.9447	27.8921	22.1315	7.89332	25.0118	3.16873
Guca1b	Guca1b	2.93678	1	3.68921	8.78529	1.96839	6.23725	3.16871
Scube2	Scube2	3.90516	7.70853	13.5496	23.2437	5.80684	18.3967	3.1681
Gm9776	Gm9776	1	4.35426	8.17122	8.78529	2.67713	8.47826	3.16692
Neil2	Neil2	1.96839	1	7.27482	2.11218	1.48419	4.6935	3.16232
Gm10252	Gm10252	1.96839	1	7.27482	2.11218	1.48419	4.6935	3.16232
Pla2g3	Pla2g3	1.96839	1	7.27482	2.11218	1.48419	4.6935	3.16232
Tmem238l	Tmem238l	1.96839	1	7.27482	2.11218	1.48419	4.6935	3.16232
Mxd3	Mxd3	7.77871	9.9447	40.4417	15.4584	8.86171	27.9501	3.15403
Gm31497	Gm31497	1.96839	1	2.79281	6.56092	1.48419	4.67686	3.15111
Rpl17-ps4	Rpl17-ps4	1.96839	1	2.79281	6.56092	1.48419	4.67686	3.15111
AU020206	AU020206	1	2.11809	5.48201	4.33655	1.55904	4.90928	3.14891
Gm42161	Gm42161	1	2.11809	5.48201	4.33655	1.55904	4.90928	3.14891
Gm37311	Gm37311	1	2.11809	5.48201	4.33655	1.55904	4.90928	3.14891
Ppt2	Ppt2	1	6.59044	11.7568	12.1218	3.79522	11.9393	3.14589
Rufy4	Rufy4	4.87355	7.70853	20.7209	18.795	6.29104	19.7579	3.14064
Xrcc2	Xrcc2	5.84194	11.0628	19.8245	33.2534	8.45236	26.5389	3.13982
Pdzd7	Pdzd7	3.90516	4.35426	17.1352	8.78529	4.12971	12.9603	3.1383
4930467D21Rik	4930467D21Rik	1	2.11809	1	8.78529	1.55904	4.89265	3.13824
Sucnr1	Sucnr1	1	2.11809	1	8.78529	1.55904	4.89265	3.13824
Nfkbie	Nfkbie	16.4942	20.0075	60.1626	54.3849	18.2508	57.2737	3.13814
Pde6d	Pde6d	16.4942	22.2437	59.2662	62.1702	19.3689	60.7182	3.13482
Adamtsl1	Adamtsl1	10.6839	2.11809	27.8921	12.1218	6.40098	20.007	3.12561
Gp1bb	Gp1bb	1.96839	2.11809	11.7568	1	2.04324	6.37842	3.12172
Napepld	Napepld	6.81033	1	18.9281	5.44874	3.90516	12.1884	3.1211
Gm37238	Gm37238	4.87355	4.35426	14.446	14.3462	4.61391	14.3961	3.12016
Gm37283	Gm37283	1	1	1.8964	4.33655	1	3.11648	3.11648
Gm16487	Gm16487	1	1	1.8964	4.33655	1	3.11648	3.11648
Gm10584	Gm10584	1	1	1.8964	4.33655	1	3.11648	3.11648
Gm43937	Gm43937	1	1	1.8964	4.33655	1	3.11648	3.11648
Gm6728	Gm6728	1	1	1.8964	4.33655	1	3.11648	3.11648
Gm9949	Gm9949	1	1	1.8964	4.33655	1	3.11648	3.11648
Nlrp1c-ps	Nlrp1c-ps	1	1	1.8964	4.33655	1	3.11648	3.11648
Nog	Nog	1	1	1.8964	4.33655	1	3.11648	3.11648
Sec16b	Sec16b	1	1	1.8964	4.33655	1	3.11648	3.11648
Clcnka	Clcnka	1	1	1.8964	4.33655	1	3.11648	3.11648
AC168881.1	AC168881.1	1	1	1.8964	4.33655	1	3.11648	3.11648
Glipr2	Glipr2	1	1	1.8964	4.33655	1	3.11648	3.11648
Gm12269	Gm12269	1	1	1.8964	4.33655	1	3.11648	3.11648
Gm26887	Gm26887	1	1	1.8964	4.33655	1	3.11648	3.11648
Trim43a	Trim43a	1	1	1.8964	4.33655	1	3.11648	3.11648
Zfp819	Zfp819	1	1	1.8964	4.33655	1	3.11648	3.11648
Gm17995	Gm17995	1	1	1.8964	4.33655	1	3.11648	3.11648
Gm38340	Gm38340	1	1	1.8964	4.33655	1	3.11648	3.11648
Gm12925	Gm12925	1	1	1.8964	4.33655	1	3.11648	3.11648
Gm37879	Gm37879	1	1	1.8964	4.33655	1	3.11648	3.11648
B230377A18Rik	B230377A18Rik	1	1	1.8964	4.33655	1	3.11648	3.11648
Pcsk1n	Pcsk1n	1	1	1.8964	4.33655	1	3.11648	3.11648
Sp100	Sp100	1	1	1.8964	4.33655	1	3.11648	3.11648
Zfp937	Zfp937	1	1	1.8964	4.33655	1	3.11648	3.11648
Dact3	Dact3	1	1	1.8964	4.33655	1	3.11648	3.11648
Lrfn1	Lrfn1	1	1	1.8964	4.33655	1	3.11648	3.11648
Mcidas	Mcidas	1	1	1.8964	4.33655	1	3.11648	3.11648
Gm37967	Gm37967	1	1	1.8964	4.33655	1	3.11648	3.11648
Gm38300	Gm38300	1	1	1.8964	4.33655	1	3.11648	3.11648
Gm29538	Gm29538	1.96839	2.11809	7.27482	5.44874	2.04324	6.36178	3.11358
Arc	Arc	1131.11	1296.86	3677.15	3874.74	1213.99	3775.94	3.11037
Proz	Proz	5.84194	4.35426	16.2388	15.4584	5.0981	15.8486	3.10873
S100a7a	S100a7a	1	6.59044	3.68921	19.9071	3.79522	11.7982	3.10869
Serpina3c	Serpina3c	1	5.47235	9.06762	11.0097	3.23618	10.0386	3.10201
Exd1	Exd1	1	4.35426	14.446	2.11218	2.67713	8.27911	3.09253
Hecw2	Hecw2	1.96839	1	8.17122	1	1.48419	4.58561	3.08963
Thap8	Thap8	1.96839	1	8.17122	1	1.48419	4.58561	3.08963
B3gnt9	B3gnt9	5.84194	11.0628	33.2705	18.795	8.45236	26.0327	3.07993
4931440F15Rik	4931440F15Rik	1	2.11809	6.37842	3.22437	1.55904	4.80139	3.0797
Lrrc26	Lrrc26	1.96839	1	3.68921	5.44874	1.48419	4.56897	3.07842
Timp1	Timp1	1.96839	1	3.68921	5.44874	1.48419	4.56897	3.07842
Slc35d2	Slc35d2	10.6839	17.7713	52.9914	34.3655	14.2276	43.6785	3.06998
Tk2	Tk2	17.4626	33.4245	99.6043	56.6092	25.4436	78.1068	3.0698
Cox15	Cox15	6.81033	9.9447	31.4777	19.9071	8.37751	25.6924	3.06683
AC107638.1	AC107638.1	1.96839	2.11809	8.17122	4.33655	2.04324	6.25389	3.06077
Gm37914	Gm37914	1.96839	2.11809	8.17122	4.33655	2.04324	6.25389	3.06077
Ccdc166	Ccdc166	1	9.9447	18.0317	15.4584	5.47235	16.745	3.05993
Mmp11	Mmp11	2.93678	1	5.48201	6.56092	1.96839	6.02147	3.05909
Gm44416	Gm44416	21.3361	7.70853	52.095	36.5899	14.5223	44.3424	3.0534
6720482G16Rik	6720482G16Rik	1.96839	2.11809	3.68921	8.78529	2.04324	6.23725	3.05263
Sdr39u1	Sdr39u1	22.3045	15.5351	65.541	49.9361	18.9198	57.7386	3.05175
Gal3st3	Gal3st3	2.93678	2.11809	9.96403	5.44874	2.52743	7.70638	3.0491
Lzts1	Lzts1	7.77871	16.6532	23.4101	51.0483	12.216	37.2292	3.04758
Mettl7a2	Mettl7a2	2.93678	2.11809	5.48201	9.89748	2.52743	7.68975	3.04251
Gm13770	Gm13770	2.93678	2.11809	5.48201	9.89748	2.52743	7.68975	3.04251
CT009757.6	CT009757.6	74.5975	75.9119	271.714	185.623	75.2547	228.668	3.03859
Gm42819	Gm42819	8.7471	4.35426	19.8245	19.9071	6.55068	19.8658	3.03263
Rasgrp4	Rasgrp4	1	6.59044	6.37842	16.5706	3.79522	11.4745	3.02341
CT009757.2	CT009757.2	30.0516	23.3618	93.3295	67.7311	26.7067	80.5303	3.01536
Agfg2	Agfg2	33.9252	52.432	138.15	122.228	43.1786	130.189	3.01512
Dach2	Dach2	2.93678	1	10.8604	1	1.96839	5.93022	3.01273
C230096K16Rik	C230096K16Rik	7.77871	8.82661	27.8921	22.1315	8.30266	25.0118	3.0125
Cdsn	Cdsn	7.77871	3.23618	5.48201	27.6924	5.50744	16.5872	3.01178
Srpk3	Srpk3	1	2.11809	7.27482	2.11218	1.55904	4.6935	3.0105
Prss30	Prss30	1	1	2.79281	3.22437	1	3.00859	3.00859
Kcnn3	Kcnn3	1	1	2.79281	3.22437	1	3.00859	3.00859
Llph-ps2	Llph-ps2	1	1	2.79281	3.22437	1	3.00859	3.00859
Astl	Astl	1	1	2.79281	3.22437	1	3.00859	3.00859
Cxcr5	Cxcr5	1	1	2.79281	3.22437	1	3.00859	3.00859
Gm24146	Gm24146	1	1	2.79281	3.22437	1	3.00859	3.00859
Mir8090	Mir8090	1	1	2.79281	3.22437	1	3.00859	3.00859
CT025619.3	CT025619.3	1	1	2.79281	3.22437	1	3.00859	3.00859
4930580E04Rik	4930580E04Rik	1	1	2.79281	3.22437	1	3.00859	3.00859
Gm11515	Gm11515	1	1	2.79281	3.22437	1	3.00859	3.00859
Slamf9	Slamf9	1	1	2.79281	3.22437	1	3.00859	3.00859
Zp2	Zp2	1	1	2.79281	3.22437	1	3.00859	3.00859
Gm37539	Gm37539	1	1	2.79281	3.22437	1	3.00859	3.00859
Gm45612	Gm45612	1	1	2.79281	3.22437	1	3.00859	3.00859
Gm8524	Gm8524	1	1	2.79281	3.22437	1	3.00859	3.00859
Rgs4	Rgs4	1	1	2.79281	3.22437	1	3.00859	3.00859
Rnf125	Rnf125	1	1	2.79281	3.22437	1	3.00859	3.00859
Gm13480	Gm13480	1	1	2.79281	3.22437	1	3.00859	3.00859
Gm20681	Gm20681	1	1	2.79281	3.22437	1	3.00859	3.00859
Gm6288	Gm6288	1	1	2.79281	3.22437	1	3.00859	3.00859
Mir6395	Mir6395	1	1	2.79281	3.22437	1	3.00859	3.00859
Rpl31-ps20	Rpl31-ps20	1	1	2.79281	3.22437	1	3.00859	3.00859
Catsperz	Catsperz	1	1	2.79281	3.22437	1	3.00859	3.00859
Gm19196	Gm19196	1	1	2.79281	3.22437	1	3.00859	3.00859
Gm16638	Gm16638	1	1	2.79281	3.22437	1	3.00859	3.00859
Cryba2	Cryba2	1	1	2.79281	3.22437	1	3.00859	3.00859
Gm45856	Gm45856	1	1	2.79281	3.22437	1	3.00859	3.00859
Tex28	Tex28	1	1	2.79281	3.22437	1	3.00859	3.00859
Il4i1	Il4i1	1	1	2.79281	3.22437	1	3.00859	3.00859
Oxt	Oxt	1	1	2.79281	3.22437	1	3.00859	3.00859
Gm25903	Gm25903	1	1	2.79281	3.22437	1	3.00859	3.00859
mt-Tf	mt-Tf	1	1	2.79281	3.22437	1	3.00859	3.00859
Mir133a-1	Mir133a-1	1	1	2.79281	3.22437	1	3.00859	3.00859
Vmn1r4	Vmn1r4	1	1	2.79281	3.22437	1	3.00859	3.00859
Gm12094	Gm12094	1.96839	1	4.58561	4.33655	1.48419	4.46108	3.00573
Krt19	Krt19	1.96839	1	4.58561	4.33655	1.48419	4.46108	3.00573
Pkd1l2	Pkd1l2	1.96839	1	4.58561	4.33655	1.48419	4.46108	3.00573
Gm20033	Gm20033	1.96839	1	4.58561	4.33655	1.48419	4.46108	3.00573
Gm28166	Gm28166	1.96839	1	4.58561	4.33655	1.48419	4.46108	3.00573
Gm17826	Gm17826	1.96839	1	4.58561	4.33655	1.48419	4.46108	3.00573
Gm12002	Gm12002	1.96839	1	4.58561	4.33655	1.48419	4.46108	3.00573
8430429K09Rik	8430429K09Rik	6.81033	5.47235	26.9957	9.89748	6.14134	18.4466	3.00367
A230050P20Rik	A230050P20Rik	1.96839	3.23618	9.06762	6.56092	2.60228	7.81427	3.00285
Mpl	Mpl	1	2.11809	2.79281	6.56092	1.55904	4.67686	2.99983
Mir5099	Mir5099	1	2.11809	2.79281	6.56092	1.55904	4.67686	2.99983
Gm7901	Gm7901	2.93678	1	1.8964	9.89748	1.96839	5.89694	2.99582
AI429214	AI429214	12.6207	6.59044	43.1309	14.3462	9.60555	28.7386	2.99187
Trim23	Trim23	46.5142	32.3065	143.528	92.1991	39.4103	117.864	2.99068
9130023H24Rik	9130023H24Rik	5.84194	5.47235	21.6173	12.1218	5.65714	16.8696	2.98199
Gm7525	Gm7525	2.93678	6.59044	16.2388	12.1218	4.76361	14.1803	2.97681
Slc46a3	Slc46a3	5.84194	1	17.1352	3.22437	3.42097	10.1798	2.97571
A430105I19Rik	A430105I19Rik	13.589	14.4171	46.7165	36.5899	14.003	41.6532	2.97458
Klf15	Klf15	4.87355	5.47235	10.8604	19.9071	5.17295	15.3838	2.97389
Trp53rka	Trp53rka	2.93678	6.59044	11.7568	16.5706	4.76361	14.1637	2.97332
1810021B22Rik	1810021B22Rik	2.93678	3.23618	16.2388	2.11218	3.08648	9.17552	2.97281
Gm10069	Gm10069	1.96839	4.35426	9.96403	8.78529	3.16133	9.37466	2.96542
Dlx3	Dlx3	18.431	18.8894	67.3338	43.263	18.6602	55.2984	2.96344
Gm43417	Gm43417	1.96839	3.23618	9.96403	5.44874	2.60228	7.70638	2.96139
A430110L20Rik	A430110L20Rik	1	4.35426	8.17122	7.67311	2.67713	7.92217	2.9592
Chrd	Chrd	1	3.23618	8.17122	4.33655	2.11809	6.25389	2.95261
0610010K14Rik	0610010K14Rik	6.81033	2.11809	15.3424	11.0097	4.46421	13.1761	2.95149
Gm16132	Gm16132	1.96839	2.11809	5.48201	6.56092	2.04324	6.02147	2.94702
Dusp2	Dusp2	1.96839	2.11809	5.48201	6.56092	2.04324	6.02147	2.94702
Ppm1n	Ppm1n	7.77871	6.59044	32.3741	9.89748	7.18458	21.1358	2.94183
4930546K05Rik	4930546K05Rik	1	2.11809	8.17122	1	1.55904	4.58561	2.9413
Sytl2	Sytl2	1	2.11809	8.17122	1	1.55904	4.58561	2.9413
Pomgnt2	Pomgnt2	8.7471	6.59044	25.2029	19.9071	7.66877	22.555	2.94115
Rbpms	Rbpms	2.93678	1	2.79281	8.78529	1.96839	5.78905	2.94101
Ankrd6	Ankrd6	22.3045	15.5351	64.6446	46.5996	18.9198	55.6221	2.93988
Slc9a7	Slc9a7	1.96839	2.11809	1	11.0097	2.04324	6.00483	2.93888
Trdmt1	Trdmt1	6.81033	7.70853	21.6173	21.0193	7.25943	21.3183	2.93664
Eya2	Eya2	1.96839	1	5.48201	3.22437	1.48419	4.35319	2.93303
AC123665.5	AC123665.5	1.96839	1	5.48201	3.22437	1.48419	4.35319	2.93303
Mrgprb3	Mrgprb3	1.96839	1	5.48201	3.22437	1.48419	4.35319	2.93303
1700007L15Rik	1700007L15Rik	1.96839	1	5.48201	3.22437	1.48419	4.35319	2.93303
Gm15573	Gm15573	1.96839	1	5.48201	3.22437	1.48419	4.35319	2.93303
Prkar1b	Prkar1b	3.90516	3.23618	5.48201	15.4584	3.57067	10.4702	2.93228
Gsdma	Gsdma	2.93678	4.35426	3.68921	17.6828	3.64552	10.686	2.93127
BC046401	BC046401	1	2.11809	3.68921	5.44874	1.55904	4.56897	2.93063
Gm46379	Gm46379	1	2.11809	3.68921	5.44874	1.55904	4.56897	2.93063
Gm8615	Gm8615	1	2.11809	3.68921	5.44874	1.55904	4.56897	2.93063
Wdr76	Wdr76	7.77871	14.4171	26.0993	38.8143	11.0979	32.4568	2.92459
Cacng1	Cacng1	1.96839	1	1	7.67311	1.48419	4.33655	2.92182
Slc38a3	Slc38a3	11.6523	16.6532	44.9237	37.7021	14.1527	41.3129	2.91907
Ubqln2	Ubqln2	10.6839	7.70853	22.5137	31.029	9.1962	26.7713	2.91113
Gm5112	Gm5112	2.93678	4.35426	13.5496	7.67311	3.64552	10.6114	2.9108
Gins3	Gins3	2.93678	8.82661	24.3065	9.89748	5.88169	17.102	2.90766
Tefm	Tefm	5.84194	5.47235	25.2029	7.67311	5.65714	16.438	2.9057
Zfp820	Zfp820	4.87355	2.11809	8.17122	12.1218	3.49582	10.1465	2.90248
Rwdd2a	Rwdd2a	1	3.23618	9.06762	3.22437	2.11809	6.146	2.90167
AC156274.1	AC156274.1	2.93678	4.35426	4.58561	16.5706	3.64552	10.5781	2.90167
Zfp580	Zfp580	1	1	3.68921	2.11218	1	2.9007	2.9007
Prdm16	Prdm16	1	1	3.68921	2.11218	1	2.9007	2.9007
Slain1os	Slain1os	1	1	3.68921	2.11218	1	2.9007	2.9007
Bicd1	Bicd1	1	1	3.68921	2.11218	1	2.9007	2.9007
Gm14799	Gm14799	1	1	3.68921	2.11218	1	2.9007	2.9007
Srrm4os	Srrm4os	1	1	3.68921	2.11218	1	2.9007	2.9007
Gm10100	Gm10100	1	1	3.68921	2.11218	1	2.9007	2.9007
5730596B20Rik	5730596B20Rik	1	1	3.68921	2.11218	1	2.9007	2.9007
A330032B11Rik	A330032B11Rik	1	1	3.68921	2.11218	1	2.9007	2.9007
AC133947.1	AC133947.1	1	1	3.68921	2.11218	1	2.9007	2.9007
Fgf16	Fgf16	1	1	3.68921	2.11218	1	2.9007	2.9007
Fgf21	Fgf21	1	1	3.68921	2.11218	1	2.9007	2.9007
Glns-ps1	Glns-ps1	1	1	3.68921	2.11218	1	2.9007	2.9007
Gm11638	Gm11638	1	1	3.68921	2.11218	1	2.9007	2.9007
Gm14703	Gm14703	1	1	3.68921	2.11218	1	2.9007	2.9007
Gm2670	Gm2670	1	1	3.68921	2.11218	1	2.9007	2.9007
Spz1	Spz1	1	1	3.68921	2.11218	1	2.9007	2.9007
Spdya	Spdya	1	1	3.68921	2.11218	1	2.9007	2.9007
AC161252.2	AC161252.2	1	1	3.68921	2.11218	1	2.9007	2.9007
Gm45872	Gm45872	1	1	3.68921	2.11218	1	2.9007	2.9007
Gm11827	Gm11827	1	1	3.68921	2.11218	1	2.9007	2.9007
Hist1h3h	Hist1h3h	1	1	3.68921	2.11218	1	2.9007	2.9007
Gm13250	Gm13250	1	1	3.68921	2.11218	1	2.9007	2.9007
Gm45353	Gm45353	1	1	3.68921	2.11218	1	2.9007	2.9007
AC157650.1	AC157650.1	1	1	3.68921	2.11218	1	2.9007	2.9007
Hist1h3e	Hist1h3e	1	1	3.68921	2.11218	1	2.9007	2.9007
Gm8738	Gm8738	1	1	3.68921	2.11218	1	2.9007	2.9007
Rdh14	Rdh14	13.589	13.299	36.8561	41.0386	13.444	38.9474	2.89701
Ism2	Ism2	1	5.47235	9.96403	8.78529	3.23618	9.37466	2.89683
Zfp341	Zfp341	1.96839	2.11809	6.37842	5.44874	2.04324	5.91358	2.89422
Tctex1d4	Tctex1d4	3.90516	2.11809	10.8604	6.56092	3.01163	8.71068	2.89235
Cacna1d	Cacna1d	6.81033	15.5351	41.3381	23.2437	11.1727	32.2909	2.89015
Tmcc2	Tmcc2	3.90516	2.11809	6.37842	11.0097	3.01163	8.69404	2.88683
Eif2ak3	Eif2ak3	16.4942	7.70853	28.7885	41.0386	12.1014	34.9136	2.88509
Gm44001	Gm44001	2.93678	6.59044	15.3424	12.1218	4.76361	13.7321	2.88272
Adam22	Adam22	4.87355	1	3.68921	13.234	2.93678	8.46162	2.88126
A530064N14Rik	A530064N14Rik	2.93678	2.11809	9.06762	5.44874	2.52743	7.25818	2.87176
Rpusd3	Rpusd3	5.84194	1	10.8604	8.78529	3.42097	9.82286	2.87137
Mesp2	Mesp2	7.77871	11.0628	29.6849	24.3559	9.42075	27.0204	2.86818
Rwdd3	Rwdd3	7.77871	5.47235	22.5137	15.4584	6.62553	18.986	2.86559
Pla2g2c	Pla2g2c	1.96839	7.70853	18.9281	8.78529	4.83846	13.8567	2.86386
A430093F15Rik	A430093F15Rik	1	2.11809	4.58561	4.33655	1.55904	4.46108	2.86142
Gas2l2	Gas2l2	1	2.11809	4.58561	4.33655	1.55904	4.46108	2.86142
Cyp4a31	Cyp4a31	1	2.11809	4.58561	4.33655	1.55904	4.46108	2.86142
Hist2h4	Hist2h4	1	2.11809	4.58561	4.33655	1.55904	4.46108	2.86142
Ccdc50-ps	Ccdc50-ps	1.96839	1	6.37842	2.11218	1.48419	4.2453	2.86034
Pga5	Pga5	1.96839	1	6.37842	2.11218	1.48419	4.2453	2.86034
Hydin	Hydin	1.96839	1	6.37842	2.11218	1.48419	4.2453	2.86034
Hephl1	Hephl1	3.90516	8.82661	15.3424	21.0193	6.36589	18.1809	2.85599
Atcay	Atcay	6.81033	13.299	34.1669	23.2437	10.0546	28.7053	2.85493
Trp73	Trp73	40.7039	30.0703	113.05	88.8626	35.3871	100.956	2.85292
Cep72	Cep72	6.81033	16.6532	54.7842	12.1218	11.7318	33.453	2.85149
Gm15929	Gm15929	1.96839	1	1.8964	6.56092	1.48419	4.22866	2.84913
Amdhd1	Amdhd1	1.96839	1	1.8964	6.56092	1.48419	4.22866	2.84913
Gm13667	Gm13667	1.96839	1	1.8964	6.56092	1.48419	4.22866	2.84913
Oas1a	Oas1a	1.96839	1	1.8964	6.56092	1.48419	4.22866	2.84913
Gnat1	Gnat1	6.81033	6.59044	17.1352	21.0193	6.70038	19.0773	2.84719
Sesn1	Sesn1	130.764	117.281	393.624	312.412	124.023	353.018	2.8464
Gm26876	Gm26876	7.77871	21.1256	46.7165	35.4777	14.4521	41.0971	2.84367
Pdpn	Pdpn	1	3.23618	5.48201	6.56092	2.11809	6.02147	2.84288
Acad12	Acad12	2.93678	4.35426	6.37842	14.3462	3.64552	10.3623	2.84248
Dlx2	Dlx2	15.5258	26.716	51.1986	68.8433	21.1209	60.0209	2.84178
Nr3c2	Nr3c2	5.84194	1	7.27482	12.1218	3.42097	9.69833	2.83497
Gm26640	Gm26640	5.84194	1	7.27482	12.1218	3.42097	9.69833	2.83497
Incenp	Incenp	41.6723	40.1331	146.217	85.526	40.9027	115.872	2.83286
Gm15674	Gm15674	1.96839	3.23618	8.17122	6.56092	2.60228	7.36607	2.83062
4930513N10Rik	4930513N10Rik	2.93678	2.11809	9.96403	4.33655	2.52743	7.15029	2.82907
Cul9	Cul9	44.5774	44.6054	135.46	116.667	44.5914	126.064	2.82709
Zfp709	Zfp709	1	5.47235	7.27482	11.0097	3.23618	9.14224	2.82501
Agxt	Agxt	1	5.47235	7.27482	11.0097	3.23618	9.14224	2.82501
Gm15998	Gm15998	3.90516	9.9447	22.5137	16.5706	6.92493	19.5421	2.822
Tubb3	Tubb3	6.81033	13.299	32.3741	24.3559	10.0546	28.365	2.82108
Spcs2-ps	Spcs2-ps	3.90516	1	7.27482	6.56092	2.45258	6.91787	2.82065
Pla2g4f	Pla2g4f	53.2929	58.0225	110.361	203.418	55.6577	156.889	2.81883
E130218I03Rik	E130218I03Rik	1.96839	4.35426	4.58561	13.234	3.16133	8.90982	2.81838
Igsf10	Igsf10	1.96839	4.35426	4.58561	13.234	3.16133	8.90982	2.81838
Fn3k	Fn3k	2.93678	5.47235	17.1352	6.56092	4.20456	11.8481	2.81791
Bco1	Bco1	2.93678	3.23618	6.37842	11.0097	3.08648	8.69404	2.81682
Ube2s	Ube2s	9.71549	21.1256	45.8201	41.0386	15.4205	43.4294	2.81634
Msantd4	Msantd4	23.2729	20.0075	67.3338	54.3849	21.6402	60.8593	2.81233
Peli3	Peli3	6.81033	22.2437	39.5453	42.1508	14.527	40.8481	2.81187
Pskh1	Pskh1	44.5774	44.6054	142.632	107.77	44.5914	125.201	2.80773
Rabl3	Rabl3	13.589	9.9447	26.0993	39.9265	11.7669	33.0129	2.80558
Kif26b	Kif26b	5.84194	7.70853	18.0317	19.9071	6.77523	18.9694	2.79981
4833413E03Rik	4833413E03Rik	1	3.23618	10.8604	1	2.11809	5.93022	2.7998
Ffar2	Ffar2	1	1	4.58561	1	1	2.79281	2.79281
AC174678.3	AC174678.3	1	1	4.58561	1	1	2.79281	2.79281
Gm9132	Gm9132	1	1	4.58561	1	1	2.79281	2.79281
Aif1l	Aif1l	1	1	4.58561	1	1	2.79281	2.79281
Col6a5	Col6a5	1	1	4.58561	1	1	2.79281	2.79281
Gm37842	Gm37842	1	1	4.58561	1	1	2.79281	2.79281
Gm43356	Gm43356	1	1	4.58561	1	1	2.79281	2.79281
AC163040.1	AC163040.1	1	1	4.58561	1	1	2.79281	2.79281
B130024G19Rik	B130024G19Rik	1	1	4.58561	1	1	2.79281	2.79281
Cnga4	Cnga4	1	1	4.58561	1	1	2.79281	2.79281
Gm29340	Gm29340	1	1	4.58561	1	1	2.79281	2.79281
Itga4	Itga4	1	1	4.58561	1	1	2.79281	2.79281
Klf17	Klf17	1	1	4.58561	1	1	2.79281	2.79281
Prss23os	Prss23os	1	1	4.58561	1	1	2.79281	2.79281
Rln3	Rln3	1	1	4.58561	1	1	2.79281	2.79281
Tdgf1-ps2	Tdgf1-ps2	1	1	4.58561	1	1	2.79281	2.79281
1700012J15Rik	1700012J15Rik	1	1	4.58561	1	1	2.79281	2.79281
2810433D01Rik	2810433D01Rik	1	1	4.58561	1	1	2.79281	2.79281
5430427N15Rik	5430427N15Rik	1	1	4.58561	1	1	2.79281	2.79281
AC139294.2	AC139294.2	1	1	4.58561	1	1	2.79281	2.79281
AC154636.1	AC154636.1	1	1	4.58561	1	1	2.79281	2.79281
AC155293.1	AC155293.1	1	1	4.58561	1	1	2.79281	2.79281
Arnt2	Arnt2	1	1	4.58561	1	1	2.79281	2.79281
CT009546.3	CT009546.3	1	1	4.58561	1	1	2.79281	2.79281
Fam19a5	Fam19a5	1	1	4.58561	1	1	2.79281	2.79281
Gm15476	Gm15476	1	1	4.58561	1	1	2.79281	2.79281
Gm20758	Gm20758	1	1	4.58561	1	1	2.79281	2.79281
Gm34084	Gm34084	1	1	4.58561	1	1	2.79281	2.79281
Gm36660	Gm36660	1	1	4.58561	1	1	2.79281	2.79281
Gm43931	Gm43931	1	1	4.58561	1	1	2.79281	2.79281
Gm43979	Gm43979	1	1	4.58561	1	1	2.79281	2.79281
Gm44064	Gm44064	1	1	4.58561	1	1	2.79281	2.79281
Gm44101	Gm44101	1	1	4.58561	1	1	2.79281	2.79281
Gm44169	Gm44169	1	1	4.58561	1	1	2.79281	2.79281
Gm45527	Gm45527	1	1	4.58561	1	1	2.79281	2.79281
Gm45833	Gm45833	1	1	4.58561	1	1	2.79281	2.79281
Gm8865	Gm8865	1	1	4.58561	1	1	2.79281	2.79281
Gngt1	Gngt1	1	1	4.58561	1	1	2.79281	2.79281
Hist1h3a	Hist1h3a	1	1	4.58561	1	1	2.79281	2.79281
Myoz2	Myoz2	1	1	4.58561	1	1	2.79281	2.79281
Ppp2r2cos	Ppp2r2cos	1	1	4.58561	1	1	2.79281	2.79281
Usp17lb	Usp17lb	1	1	4.58561	1	1	2.79281	2.79281
Gm3940	Gm3940	1	1	4.58561	1	1	2.79281	2.79281
Gm42651	Gm42651	1	1	4.58561	1	1	2.79281	2.79281
Kcnj6	Kcnj6	1	1	4.58561	1	1	2.79281	2.79281
1700086P04Rik	1700086P04Rik	1	1	4.58561	1	1	2.79281	2.79281
BC049762	BC049762	1	1	4.58561	1	1	2.79281	2.79281
Gm11599	Gm11599	1	1	4.58561	1	1	2.79281	2.79281
Gm13865	Gm13865	1	1	4.58561	1	1	2.79281	2.79281
Gm32460	Gm32460	1	1	4.58561	1	1	2.79281	2.79281
Gm43743	Gm43743	1	1	4.58561	1	1	2.79281	2.79281
CT573086.2	CT573086.2	1	1	4.58561	1	1	2.79281	2.79281
E230034D01Rik	E230034D01Rik	1	1	4.58561	1	1	2.79281	2.79281
Entpd3	Entpd3	1	2.11809	5.48201	3.22437	1.55904	4.35319	2.79222
Sema3a	Sema3a	1.96839	2.11809	8.17122	3.22437	2.04324	5.6978	2.78861
Sfta2	Sfta2	1.96839	1	7.27482	1	1.48419	4.13741	2.78765
Bfsp1	Bfsp1	2.93678	1	9.96403	1	1.96839	5.48201	2.78503
2310001K24Rik	2310001K24Rik	1	3.23618	1.8964	9.89748	2.11809	5.89694	2.78409
Lrrc31	Lrrc31	10.6839	11.0628	35.0633	25.4681	10.8733	30.2657	2.78348
Vnn3	Vnn3	1	2.11809	1	7.67311	1.55904	4.33655	2.78155
Ssc5d	Ssc5d	1.96839	2.11809	3.68921	7.67311	2.04324	5.68116	2.78047
Gm19040	Gm19040	1.96839	2.11809	3.68921	7.67311	2.04324	5.68116	2.78047
Fbxo41	Fbxo41	6.81033	3.23618	18.0317	9.89748	5.02325	13.9646	2.77999
Fam174a	Fam174a	12.6207	17.7713	42.2345	42.1508	15.196	42.1927	2.77657
1110003F10Rik	1110003F10Rik	1.96839	1	2.79281	5.44874	1.48419	4.12077	2.77644
A030005L19Rik	A030005L19Rik	1.96839	1	2.79281	5.44874	1.48419	4.12077	2.77644
D7Ertd443e	D7Ertd443e	1.96839	1	2.79281	5.44874	1.48419	4.12077	2.77644
Cetn4	Cetn4	1.96839	1	2.79281	5.44874	1.48419	4.12077	2.77644
Gm5422	Gm5422	1.96839	1	2.79281	5.44874	1.48419	4.12077	2.77644
Gm37297	Gm37297	4.87355	11.0628	15.3424	28.8046	7.96817	22.0735	2.77021
Gm45828	Gm45828	24.2413	30.0703	87.9511	62.1702	27.1558	75.0606	2.76407
9930012K11Rik	9930012K11Rik	11.6523	2.11809	26.9957	11.0097	6.88518	19.0027	2.75994
Fam83a	Fam83a	7.77871	13.299	44.9237	13.234	10.5388	29.0789	2.75921
Serpinh1	Serpinh1	34.8936	27.8341	108.568	64.3945	31.3638	86.4814	2.75736
Nthl1	Nthl1	6.81033	7.70853	18.9281	21.0193	7.25943	19.9737	2.75141
Nlrp1a	Nlrp1a	4.87355	4.35426	5.48201	19.9071	4.61391	12.6946	2.75137
Ccnj	Ccnj	4.87355	4.35426	5.48201	19.9071	4.61391	12.6946	2.75137
Ndufaf8	Ndufaf8	17.4626	14.4171	28.7885	58.8336	15.9398	43.811	2.74853
Cacna1g	Cacna1g	6.81033	13.299	34.1669	21.0193	10.0546	27.5931	2.74431
4933417C20Rik	4933417C20Rik	1	3.23618	7.27482	4.33655	2.11809	5.80569	2.741
Dcst2	Dcst2	18.431	3.23618	30.5813	28.8046	10.8336	29.693	2.74083
Gm15774	Gm15774	2.93678	5.47235	15.3424	7.67311	4.20456	11.5078	2.73697
Iqcf3	Iqcf3	1.96839	2.11809	9.06762	2.11218	2.04324	5.5899	2.73581
9330159M07Rik	9330159M07Rik	1.96839	2.11809	9.06762	2.11218	2.04324	5.5899	2.73581
Zfp974	Zfp974	5.84194	1	5.48201	13.234	3.42097	9.35802	2.73549
Obsl1	Obsl1	9.71549	9.9447	21.6173	32.1412	9.8301	26.8792	2.73438
Sh2d7	Sh2d7	3.90516	1	9.06762	4.33655	2.45258	6.70209	2.73267
Gm5842	Gm5842	2.93678	4.35426	14.446	5.44874	3.64552	9.94739	2.72866
Gm5069	Gm5069	1.96839	2.11809	4.58561	6.56092	2.04324	5.57327	2.72766
Gm37537	Gm37537	1.96839	2.11809	4.58561	6.56092	2.04324	5.57327	2.72766
2018-09-01	2018-09-01	6.81033	2.11809	14.446	9.89748	4.46421	12.1718	2.72652
Gm7997	Gm7997	3.90516	1	4.58561	8.78529	2.45258	6.68545	2.72588
Gm38161	Gm38161	25.2097	26.716	59.2662	82.1895	25.9629	70.7278	2.72419
Prob1	Prob1	1.96839	7.70853	15.3424	11.0097	4.83846	13.1761	2.72319
Runx2os1	Runx2os1	1	2.11809	6.37842	2.11218	1.55904	4.2453	2.72302
Gm22667	Gm22667	1	2.11809	6.37842	2.11218	1.55904	4.2453	2.72302
Gm45416	Gm45416	1	2.11809	6.37842	2.11218	1.55904	4.2453	2.72302
Gm10605	Gm10605	1	2.11809	6.37842	2.11218	1.55904	4.2453	2.72302
Esco2	Esco2	13.589	3.23618	26.9957	18.795	8.41261	22.8953	2.72155
Cenpj	Cenpj	4.87355	18.8894	22.5137	42.1508	11.8815	32.3323	2.72123
Zbtb8a	Zbtb8a	4.87355	4.35426	20.7209	4.33655	4.61391	12.5287	2.71542
Prdm14	Prdm14	2.93678	1	1.8964	8.78529	1.96839	5.34085	2.71331
4930447F24Rik	4930447F24Rik	1	2.11809	1.8964	6.56092	1.55904	4.22866	2.71234
D630039A03Rik	D630039A03Rik	1	2.11809	1.8964	6.56092	1.55904	4.22866	2.71234
Gm43387	Gm43387	1	2.11809	1.8964	6.56092	1.55904	4.22866	2.71234
Gm13535	Gm13535	3.90516	5.47235	9.96403	15.4584	4.68876	12.7112	2.711
Gm43936	Gm43936	1.96839	1	3.68921	4.33655	1.48419	4.01288	2.70374
Dsg4	Dsg4	1.96839	1	3.68921	4.33655	1.48419	4.01288	2.70374
Gm42696	Gm42696	1.96839	1	3.68921	4.33655	1.48419	4.01288	2.70374
Epm2a	Epm2a	1.96839	1	3.68921	4.33655	1.48419	4.01288	2.70374
C230038L03Rik	C230038L03Rik	1.96839	1	3.68921	4.33655	1.48419	4.01288	2.70374
1700125H20Rik	1700125H20Rik	1.96839	1	3.68921	4.33655	1.48419	4.01288	2.70374
Stxbp3-ps	Stxbp3-ps	1.96839	1	3.68921	4.33655	1.48419	4.01288	2.70374
C430014B12Rik	C430014B12Rik	1.96839	1	3.68921	4.33655	1.48419	4.01288	2.70374
A930016O22Rik	A930016O22Rik	1.96839	1	3.68921	4.33655	1.48419	4.01288	2.70374
Gm4342	Gm4342	1.96839	1	3.68921	4.33655	1.48419	4.01288	2.70374
Csrnp2	Csrnp2	12.6207	15.5351	40.4417	35.4777	14.0779	37.9597	2.69641
Gm38036	Gm38036	6.81033	13.299	29.6849	24.3559	10.0546	27.0204	2.68735
Lrfn4	Lrfn4	3.90516	3.23618	8.17122	11.0097	3.57067	9.59044	2.68589
Gm23553	Gm23553	1	7.70853	4.58561	18.795	4.35426	11.6903	2.68479
Zfp334	Zfp334	1	3.23618	3.68921	7.67311	2.11809	5.68116	2.68221
Gm8696	Gm8696	20.3678	25.5979	84.3655	38.8143	22.9828	61.5899	2.67982
Gsdmc	Gsdmc	3.90516	1	1	12.1218	2.45258	6.56092	2.67511
4930481A15Rik	4930481A15Rik	5.84194	4.35426	16.2388	11.0097	5.0981	13.6243	2.67242
Dbndd2	Dbndd2	11.6523	5.47235	22.5137	23.2437	8.56231	22.8787	2.67202
Ddit4	Ddit4	11.6523	21.1256	47.6129	39.9265	16.3889	43.7697	2.67069
Ackr3	Ackr3	348.651	292.821	914.434	798.436	320.736	856.435	2.67022
Gkn1	Gkn1	1	1	1	4.33655	1	2.66828	2.66828
Gm15371	Gm15371	1	1	1	4.33655	1	2.66828	2.66828
Gm5860	Gm5860	1	1	1	4.33655	1	2.66828	2.66828
1700027A07Rik	1700027A07Rik	1	1	1	4.33655	1	2.66828	2.66828
AC118222.1	AC118222.1	1	1	1	4.33655	1	2.66828	2.66828
Gm11675	Gm11675	1	1	1	4.33655	1	2.66828	2.66828
Gm44864	Gm44864	1	1	1	4.33655	1	2.66828	2.66828
Gm8652	Gm8652	1	1	1	4.33655	1	2.66828	2.66828
AC113125.1	AC113125.1	1	1	1	4.33655	1	2.66828	2.66828
Rdh7	Rdh7	1	1	1	4.33655	1	2.66828	2.66828
Nnmt	Nnmt	1	1	1	4.33655	1	2.66828	2.66828
4931429L15Rik	4931429L15Rik	1	1	1	4.33655	1	2.66828	2.66828
Gm13547	Gm13547	1	1	1	4.33655	1	2.66828	2.66828
Gm35808	Gm35808	1	1	1	4.33655	1	2.66828	2.66828
Gphb5	Gphb5	1	1	1	4.33655	1	2.66828	2.66828
Rpl3l	Rpl3l	1	1	1	4.33655	1	2.66828	2.66828
Zfp759	Zfp759	1	1	1	4.33655	1	2.66828	2.66828
2900018N21Rik	2900018N21Rik	1	1	1	4.33655	1	2.66828	2.66828
AC165265.1	AC165265.1	1	1	1	4.33655	1	2.66828	2.66828
Gm12551	Gm12551	1	1	1	4.33655	1	2.66828	2.66828
Gm20501	Gm20501	1	1	1	4.33655	1	2.66828	2.66828
Gm25256	Gm25256	1	1	1	4.33655	1	2.66828	2.66828
Gm26585	Gm26585	1	1	1	4.33655	1	2.66828	2.66828
Gm43990	Gm43990	1	1	1	4.33655	1	2.66828	2.66828
Gm5997	Gm5997	1	1	1	4.33655	1	2.66828	2.66828
H2-Q2	H2-Q2	1	1	1	4.33655	1	2.66828	2.66828
Platr6	Platr6	1	1	1	4.33655	1	2.66828	2.66828
Prss45	Prss45	1	1	1	4.33655	1	2.66828	2.66828
Rdh16	Rdh16	1	1	1	4.33655	1	2.66828	2.66828
Rgs1	Rgs1	1	1	1	4.33655	1	2.66828	2.66828
Sec14l5	Sec14l5	1	1	1	4.33655	1	2.66828	2.66828
C8b	C8b	1	1	1	4.33655	1	2.66828	2.66828
1700123L14Rik	1700123L14Rik	1	1	1	4.33655	1	2.66828	2.66828
1810063I02Rik	1810063I02Rik	1	1	1	4.33655	1	2.66828	2.66828
3830417A13Rik	3830417A13Rik	1	1	1	4.33655	1	2.66828	2.66828
4930542C12Rik	4930542C12Rik	1	1	1	4.33655	1	2.66828	2.66828
4931413I07Rik	4931413I07Rik	1	1	1	4.33655	1	2.66828	2.66828
A330048O09Rik	A330048O09Rik	1	1	1	4.33655	1	2.66828	2.66828
A330076C08Rik	A330076C08Rik	1	1	1	4.33655	1	2.66828	2.66828
AC138604.2	AC138604.2	1	1	1	4.33655	1	2.66828	2.66828
AC171003.1	AC171003.1	1	1	1	4.33655	1	2.66828	2.66828
Adamtsl2	Adamtsl2	1	1	1	4.33655	1	2.66828	2.66828
Asb18	Asb18	1	1	1	4.33655	1	2.66828	2.66828
CT025645.1	CT025645.1	1	1	1	4.33655	1	2.66828	2.66828
Fsd2	Fsd2	1	1	1	4.33655	1	2.66828	2.66828
Gm12596	Gm12596	1	1	1	4.33655	1	2.66828	2.66828
Gm12654	Gm12654	1	1	1	4.33655	1	2.66828	2.66828
Gm13025	Gm13025	1	1	1	4.33655	1	2.66828	2.66828
Gm13372	Gm13372	1	1	1	4.33655	1	2.66828	2.66828
Gm13624	Gm13624	1	1	1	4.33655	1	2.66828	2.66828
Gm14320	Gm14320	1	1	1	4.33655	1	2.66828	2.66828
Gm24616	Gm24616	1	1	1	4.33655	1	2.66828	2.66828
Gm31727	Gm31727	1	1	1	4.33655	1	2.66828	2.66828
Gm36235	Gm36235	1	1	1	4.33655	1	2.66828	2.66828
Gm37945	Gm37945	1	1	1	4.33655	1	2.66828	2.66828
Gm39377	Gm39377	1	1	1	4.33655	1	2.66828	2.66828
Gm4178	Gm4178	1	1	1	4.33655	1	2.66828	2.66828
Gm42461	Gm42461	1	1	1	4.33655	1	2.66828	2.66828
Gm42722	Gm42722	1	1	1	4.33655	1	2.66828	2.66828
Gm43573	Gm43573	1	1	1	4.33655	1	2.66828	2.66828
Krt39	Krt39	1	1	1	4.33655	1	2.66828	2.66828
Krt88	Krt88	1	1	1	4.33655	1	2.66828	2.66828
Marco	Marco	1	1	1	4.33655	1	2.66828	2.66828
Mir7008	Mir7008	1	1	1	4.33655	1	2.66828	2.66828
Mro	Mro	1	1	1	4.33655	1	2.66828	2.66828
Olfr1292-ps1	Olfr1292-ps1	1	1	1	4.33655	1	2.66828	2.66828
Olfr136	Olfr136	1	1	1	4.33655	1	2.66828	2.66828
Pgpep1l	Pgpep1l	1	1	1	4.33655	1	2.66828	2.66828
Rap1gapos	Rap1gapos	1	1	1	4.33655	1	2.66828	2.66828
Sall1	Sall1	1	1	1	4.33655	1	2.66828	2.66828
Serpina3a	Serpina3a	1	1	1	4.33655	1	2.66828	2.66828
Slc22a19	Slc22a19	1	1	1	4.33655	1	2.66828	2.66828
Sohlh2	Sohlh2	1	1	1	4.33655	1	2.66828	2.66828
Tmem132d	Tmem132d	1	1	1	4.33655	1	2.66828	2.66828
Tph1	Tph1	1	1	1	4.33655	1	2.66828	2.66828
Gm2044	Gm2044	1	1	1	4.33655	1	2.66828	2.66828
AC102569.1	AC102569.1	1	1	1	4.33655	1	2.66828	2.66828
AC102847.1	AC102847.1	1	1	1	4.33655	1	2.66828	2.66828
Gm12318	Gm12318	1	1	1	4.33655	1	2.66828	2.66828
Gm17304	Gm17304	1	1	1	4.33655	1	2.66828	2.66828
Gm19589	Gm19589	1	1	1	4.33655	1	2.66828	2.66828
Gm35454	Gm35454	1	1	1	4.33655	1	2.66828	2.66828
Gm3604	Gm3604	1	1	1	4.33655	1	2.66828	2.66828
Gm40884	Gm40884	1	1	1	4.33655	1	2.66828	2.66828
Gm12989	Gm12989	1	1	1	4.33655	1	2.66828	2.66828
4930553I21Rik	4930553I21Rik	1	1	1	4.33655	1	2.66828	2.66828
Gm5122	Gm5122	1	1	1	4.33655	1	2.66828	2.66828
Olfr397	Olfr397	1	1	1	4.33655	1	2.66828	2.66828
Rfx4	Rfx4	1	1	1	4.33655	1	2.66828	2.66828
1600023N17Rik	1600023N17Rik	1	1	1	4.33655	1	2.66828	2.66828
Olfr456	Olfr456	1	1	1	4.33655	1	2.66828	2.66828
Gm28019	Gm28019	1	1	1	4.33655	1	2.66828	2.66828
Itih1	Itih1	1	1	1	4.33655	1	2.66828	2.66828
Gm15976	Gm15976	1	1	1	4.33655	1	2.66828	2.66828
Gm20406	Gm20406	1	1	1	4.33655	1	2.66828	2.66828
Gm7775	Gm7775	1	1	1	4.33655	1	2.66828	2.66828
Slc13a5	Slc13a5	1	1	1	4.33655	1	2.66828	2.66828
Fam186a	Fam186a	1	1	1	4.33655	1	2.66828	2.66828
Gm10557	Gm10557	10.6839	6.59044	30.5813	15.4584	8.63716	23.0198	2.66521
4930556N13Rik	4930556N13Rik	1	4.35426	5.48201	8.78529	2.67713	7.13365	2.66466
Mtrf1	Mtrf1	9.71549	12.1809	35.0633	23.2437	10.9482	29.1535	2.66286
Kcna7	Kcna7	1	2.11809	7.27482	1	1.55904	4.13741	2.65381
1110006O24Rik	1110006O24Rik	1	2.11809	7.27482	1	1.55904	4.13741	2.65381
Trim2	Trim2	173.373	157.532	494.022	383.592	165.453	438.807	2.65216
Gm44981	Gm44981	37.7987	28.9522	87.0547	89.9748	33.3755	88.5147	2.65209
Mmp10	Mmp10	106.554	128.462	243.029	380.255	117.508	311.642	2.65209
Gm12840	Gm12840	3.90516	4.35426	10.8604	11.0097	4.12971	10.935	2.64789
Fgfrl1	Fgfrl1	5.84194	1	12.6532	5.44874	3.42097	9.05099	2.64574
Dscc1	Dscc1	9.71549	5.47235	18.0317	22.1315	7.59392	20.0816	2.64443
Gm5276	Gm5276	1	2.11809	2.79281	5.44874	1.55904	4.12077	2.64314
AC158990.1	AC158990.1	1	2.11809	2.79281	5.44874	1.55904	4.12077	2.64314
Gm17827	Gm17827	1	2.11809	2.79281	5.44874	1.55904	4.12077	2.64314
Slit2	Slit2	5.84194	1	8.17122	9.89748	3.42097	9.03435	2.64087
Snrpn	Snrpn	1	3.23618	9.06762	2.11218	2.11809	5.5899	2.63913
Tchh	Tchh	17.4626	35.6607	83.4691	56.6092	26.5617	70.0391	2.63685
Zfp354a	Zfp354a	1.96839	5.47235	6.37842	13.234	3.72037	9.80622	2.63582
Eras	Eras	1	3.23618	4.58561	6.56092	2.11809	5.57327	2.63127
Txnl4b	Txnl4b	16.4942	13.299	44.0273	34.3655	14.8966	39.1964	2.63124
Gm18256	Gm18256	1.96839	1	4.58561	3.22437	1.48419	3.90499	2.63105
Gm36266	Gm36266	1.96839	1	4.58561	3.22437	1.48419	3.90499	2.63105
4921536K21Rik	4921536K21Rik	1.96839	1	4.58561	3.22437	1.48419	3.90499	2.63105
Gm12341	Gm12341	1.96839	1	4.58561	3.22437	1.48419	3.90499	2.63105
Gm45051	Gm45051	2.93678	5.47235	9.96403	12.1218	4.20456	11.0429	2.62642
Tmppe	Tmppe	25.2097	18.8894	50.3022	65.5067	22.0495	57.9044	2.62611
Fam46b	Fam46b	57.1665	41.2512	141.735	116.667	49.2088	129.201	2.62557
Heatr9	Heatr9	3.90516	2.11809	3.68921	12.1218	3.01163	7.90553	2.625
Pcolce2	Pcolce2	1	4.35426	6.37842	7.67311	2.67713	7.02576	2.62436
Zfp788	Zfp788	16.4942	11.0628	32.3741	39.9265	13.7785	36.1503	2.62367
Maneal	Maneal	2.93678	7.70853	18.0317	9.89748	5.32265	13.9646	2.62361
Pm20d2	Pm20d2	2.93678	15.5351	25.2029	23.2437	9.23596	24.2233	2.62271
Dyrk1b	Dyrk1b	25.2097	20.0075	57.4734	61.058	22.6086	59.2657	2.62138
Tmem53	Tmem53	15.5258	3.23618	22.5137	26.5802	9.381	24.547	2.61667
Gm42788	Gm42788	1.96839	2.11809	1.8964	8.78529	2.04324	5.34085	2.61391
AC126257.1	AC126257.1	1.96839	2.11809	1.8964	8.78529	2.04324	5.34085	2.61391
Atp23	Atp23	17.4626	11.0628	36.8561	37.7021	14.2627	37.2791	2.61375
Mrnip	Mrnip	25.2097	22.2437	76.2978	47.7118	23.7267	62.0048	2.61329
Pcsk4	Pcsk4	7.77871	6.59044	24.3065	13.234	7.18458	18.7703	2.61258
Thsd1	Thsd1	1.96839	7.70853	19.8245	5.44874	4.83846	12.6366	2.6117
Rfesd	Rfesd	5.84194	7.70853	24.3065	11.0097	6.77523	17.6581	2.60627
Gm17477	Gm17477	2.93678	1	3.68921	6.56092	1.96839	5.12507	2.60369
Lrrc32	Lrrc32	2.93678	1	3.68921	6.56092	1.96839	5.12507	2.60369
Gm11613	Gm11613	2.93678	1	3.68921	6.56092	1.96839	5.12507	2.60369
Gm17815	Gm17815	2.93678	2.11809	5.48201	7.67311	2.52743	6.57756	2.60247
Kiss1r	Kiss1r	2.93678	3.23618	7.27482	8.78529	3.08648	8.03006	2.60169
Chadl	Chadl	10.6839	18.8894	36.8561	39.9265	14.7866	38.3913	2.59635
6030443J06Rik	6030443J06Rik	6.81033	9.9447	18.0317	25.4681	8.37751	21.7499	2.59622
Mx1	Mx1	2.93678	2.11809	1	12.1218	2.52743	6.56092	2.59589
Cdc25c	Cdc25c	32.9568	23.3618	118.429	27.6924	28.1593	73.0606	2.59455
Exoc3l2	Exoc3l2	19.3994	4.35426	30.5813	31.029	11.8768	30.8051	2.59372
Tpd52l1	Tpd52l1	4.87355	11.0628	22.5137	18.795	7.96817	20.6543	2.5921
Lck	Lck	4.87355	6.59044	10.8604	18.795	5.73199	14.8277	2.58683
Zfp810	Zfp810	17.4626	18.8894	52.9914	41.0386	18.176	47.015	2.58665
Hus1	Hus1	6.81033	15.5351	23.4101	34.3655	11.1727	28.8878	2.58556
Gm29480	Gm29480	1	4.35426	7.27482	6.56092	2.67713	6.91787	2.58406
Awat2	Awat2	4.87355	1	6.37842	8.78529	2.93678	7.58185	2.58169
Taf2	Taf2	23.2729	21.1256	64.6446	49.9361	22.1992	57.2904	2.58073
Gm36423	Gm36423	1	3.23618	5.48201	5.44874	2.11809	5.46538	2.58034
Gm3635	Gm3635	1	3.23618	5.48201	5.44874	2.11809	5.46538	2.58034
AW146154	AW146154	3.90516	12.1809	17.1352	24.3559	8.04302	20.7456	2.57933
Rnaseh1	Rnaseh1	42.6407	32.3065	103.19	89.9748	37.4736	96.5823	2.57735
Cyp1b1	Cyp1b1	1.96839	12.1809	28.7885	7.67311	7.07463	18.2308	2.57692
Gsr	Gsr	32.9568	21.1256	77.1942	62.1702	27.0412	69.6822	2.57689
Amacr	Amacr	18.431	23.3618	56.577	51.0483	20.8964	53.8126	2.57522
Irs1	Irs1	91.0601	132.934	302.191	274.597	111.997	288.394	2.57501
Ppp1r18os	Ppp1r18os	1	2.11809	3.68921	4.33655	1.55904	4.01288	2.57394
Scrn1	Scrn1	1	2.11809	3.68921	4.33655	1.55904	4.01288	2.57394
Olfr221	Olfr221	1	2.11809	3.68921	4.33655	1.55904	4.01288	2.57394
Onecut3	Onecut3	1	2.11809	3.68921	4.33655	1.55904	4.01288	2.57394
Gm38358	Gm38358	1	2.11809	3.68921	4.33655	1.55904	4.01288	2.57394
Gm15850	Gm15850	1	2.11809	3.68921	4.33655	1.55904	4.01288	2.57394
Gm24198	Gm24198	1	2.11809	3.68921	4.33655	1.55904	4.01288	2.57394
Gm44007	Gm44007	1.96839	2.11809	7.27482	3.22437	2.04324	5.24959	2.56925
Gm6023	Gm6023	1.96839	2.11809	7.27482	3.22437	2.04324	5.24959	2.56925
Lrrc75a	Lrrc75a	11.6523	7.70853	19.8245	29.9168	9.6804	24.8706	2.56917
Pgbd1	Pgbd1	1.96839	4.35426	1.8964	14.3462	3.16133	8.12131	2.56896
Uspl1	Uspl1	147.227	157.532	413.345	368.021	152.379	390.683	2.56388
Zfp783	Zfp783	4.87355	3.23618	15.3424	5.44874	4.05486	10.3956	2.56373
Gm13525	Gm13525	1.96839	2.11809	2.79281	7.67311	2.04324	5.23296	2.56111
Kcne4	Kcne4	1	1	1.8964	3.22437	1	2.56039	2.56039
Gm11935	Gm11935	1	1	1.8964	3.22437	1	2.56039	2.56039
1700028K03Rik	1700028K03Rik	1	1	1.8964	3.22437	1	2.56039	2.56039
C7	C7	1	1	1.8964	3.22437	1	2.56039	2.56039
Rpl23a-ps4	Rpl23a-ps4	1	1	1.8964	3.22437	1	2.56039	2.56039
Gm12280	Gm12280	1	1	1.8964	3.22437	1	2.56039	2.56039
Gm15441	Gm15441	1	1	1.8964	3.22437	1	2.56039	2.56039
Snord118	Snord118	1	1	1.8964	3.22437	1	2.56039	2.56039
Kcnj12	Kcnj12	1	1	1.8964	3.22437	1	2.56039	2.56039
Gm11210	Gm11210	1	1	1.8964	3.22437	1	2.56039	2.56039
Gm29123	Gm29123	1	1	1.8964	3.22437	1	2.56039	2.56039
Gm6139	Gm6139	1	1	1.8964	3.22437	1	2.56039	2.56039
Mir1970	Mir1970	1	1	1.8964	3.22437	1	2.56039	2.56039
Ascl4	Ascl4	1	1	1.8964	3.22437	1	2.56039	2.56039
D630002J18Rik	D630002J18Rik	1	1	1.8964	3.22437	1	2.56039	2.56039
Gata2	Gata2	1	1	1.8964	3.22437	1	2.56039	2.56039
Gm13664	Gm13664	1	1	1.8964	3.22437	1	2.56039	2.56039
Gm15432	Gm15432	1	1	1.8964	3.22437	1	2.56039	2.56039
Gm28085	Gm28085	1	1	1.8964	3.22437	1	2.56039	2.56039
Gm281	Gm281	1	1	1.8964	3.22437	1	2.56039	2.56039
Gm38301	Gm38301	1	1	1.8964	3.22437	1	2.56039	2.56039
Gucy1a3	Gucy1a3	1	1	1.8964	3.22437	1	2.56039	2.56039
Mir378c	Mir378c	1	1	1.8964	3.22437	1	2.56039	2.56039
Sprr2j-ps	Sprr2j-ps	1	1	1.8964	3.22437	1	2.56039	2.56039
Tmem255a	Tmem255a	1	1	1.8964	3.22437	1	2.56039	2.56039
Tpo	Tpo	1	1	1.8964	3.22437	1	2.56039	2.56039
Gm43186	Gm43186	1	1	1.8964	3.22437	1	2.56039	2.56039
4931431C16Rik	4931431C16Rik	1	1	1.8964	3.22437	1	2.56039	2.56039
A530095I07Rik	A530095I07Rik	1	1	1.8964	3.22437	1	2.56039	2.56039
AL607131.1	AL607131.1	1	1	1.8964	3.22437	1	2.56039	2.56039
Ccdc183	Ccdc183	1	1	1.8964	3.22437	1	2.56039	2.56039
Chrna5	Chrna5	1	1	1.8964	3.22437	1	2.56039	2.56039
Cst12	Cst12	1	1	1.8964	3.22437	1	2.56039	2.56039
Dscaml1	Dscaml1	1	1	1.8964	3.22437	1	2.56039	2.56039
Fads6	Fads6	1	1	1.8964	3.22437	1	2.56039	2.56039
G630016G05Rik	G630016G05Rik	1	1	1.8964	3.22437	1	2.56039	2.56039
Gm25099	Gm25099	1	1	1.8964	3.22437	1	2.56039	2.56039
Gm38188	Gm38188	1	1	1.8964	3.22437	1	2.56039	2.56039
Gm40477	Gm40477	1	1	1.8964	3.22437	1	2.56039	2.56039
Gm42511	Gm42511	1	1	1.8964	3.22437	1	2.56039	2.56039
Gm42808	Gm42808	1	1	1.8964	3.22437	1	2.56039	2.56039
Gm42853	Gm42853	1	1	1.8964	3.22437	1	2.56039	2.56039
Gm7977	Gm7977	1	1	1.8964	3.22437	1	2.56039	2.56039
Lta	Lta	1	1	1.8964	3.22437	1	2.56039	2.56039
Lyzl4	Lyzl4	1	1	1.8964	3.22437	1	2.56039	2.56039
Myrip	Myrip	1	1	1.8964	3.22437	1	2.56039	2.56039
Olfr1310	Olfr1310	1	1	1.8964	3.22437	1	2.56039	2.56039
Plekhg1	Plekhg1	1	1	1.8964	3.22437	1	2.56039	2.56039
Prrt4	Prrt4	1	1	1.8964	3.22437	1	2.56039	2.56039
Zfpm2	Zfpm2	1	1	1.8964	3.22437	1	2.56039	2.56039
Col11a1	Col11a1	1	1	1.8964	3.22437	1	2.56039	2.56039
Gm22516	Gm22516	1	1	1.8964	3.22437	1	2.56039	2.56039
Rtl8b	Rtl8b	1	1	1.8964	3.22437	1	2.56039	2.56039
Rpl21-ps10	Rpl21-ps10	1	1	1.8964	3.22437	1	2.56039	2.56039
9530059O14Rik	9530059O14Rik	1	1	1.8964	3.22437	1	2.56039	2.56039
Gm8659	Gm8659	1	1	1.8964	3.22437	1	2.56039	2.56039
S100b	S100b	1	1	1.8964	3.22437	1	2.56039	2.56039
Sfrp5	Sfrp5	1	1	1.8964	3.22437	1	2.56039	2.56039
Xntrpc	Xntrpc	1	1	1.8964	3.22437	1	2.56039	2.56039
Zfp991	Zfp991	1	1	1.8964	3.22437	1	2.56039	2.56039
Arg1	Arg1	1	1	1.8964	3.22437	1	2.56039	2.56039
Gm16463	Gm16463	1	1	1.8964	3.22437	1	2.56039	2.56039
Gm20493	Gm20493	1	1	1.8964	3.22437	1	2.56039	2.56039
Hid1	Hid1	1	1	1.8964	3.22437	1	2.56039	2.56039
Rbm8a2	Rbm8a2	1	1	1.8964	3.22437	1	2.56039	2.56039
A330015K06Rik	A330015K06Rik	1	1	1.8964	3.22437	1	2.56039	2.56039
AC126459.1	AC126459.1	1	1	1.8964	3.22437	1	2.56039	2.56039
E230029C05Rik	E230029C05Rik	1	1	1.8964	3.22437	1	2.56039	2.56039
Gm45435	Gm45435	1	1	1.8964	3.22437	1	2.56039	2.56039
Itpka	Itpka	1	1	1.8964	3.22437	1	2.56039	2.56039
AC139845.1	AC139845.1	1	1	1.8964	3.22437	1	2.56039	2.56039
Gm26268	Gm26268	1	1	1.8964	3.22437	1	2.56039	2.56039
Gm7312	Gm7312	1	1	1.8964	3.22437	1	2.56039	2.56039
Mei1	Mei1	1	1	1.8964	3.22437	1	2.56039	2.56039
Gm11571	Gm11571	1	1	1.8964	3.22437	1	2.56039	2.56039
Mir6913	Mir6913	1	1	1.8964	3.22437	1	2.56039	2.56039
Gm37183	Gm37183	4.87355	3.23618	10.8604	9.89748	4.05486	10.379	2.55963
Fndc4	Fndc4	1.96839	1	5.48201	2.11218	1.48419	3.7971	2.55836
Hsf2bp	Hsf2bp	1.96839	1	5.48201	2.11218	1.48419	3.7971	2.55836
Gm10138	Gm10138	7.77871	5.47235	11.7568	22.1315	6.62553	16.9442	2.55741
Fkbp7	Fkbp7	10.6839	5.47235	22.5137	18.795	8.07811	20.6543	2.55682
Frg2f1	Frg2f1	8.7471	15.5351	28.7885	33.2534	12.1411	31.0209	2.55503
Fabp6	Fabp6	1.96839	5.47235	13.5496	5.44874	3.72037	9.49919	2.55329
Mettl5os	Mettl5os	2.93678	2.11809	1.8964	11.0097	2.52743	6.45303	2.5532
Gm14820	Gm14820	2.93678	1	4.58561	5.44874	1.96839	5.01717	2.54888
Ddx25	Ddx25	1.96839	1	1	6.56092	1.48419	3.78046	2.54715
Gm28323	Gm28323	1.96839	1	1	6.56092	1.48419	3.78046	2.54715
Rian	Rian	1.96839	1	1	6.56092	1.48419	3.78046	2.54715
Gm10443	Gm10443	1.96839	1	1	6.56092	1.48419	3.78046	2.54715
1110038B12Rik	1110038B12Rik	155.942	115.045	453.683	235.671	135.493	344.677	2.54387
Gm6794	Gm6794	5.84194	5.47235	9.96403	18.795	5.65714	14.3795	2.54183
Ypel4	Ypel4	5.84194	1	6.37842	11.0097	3.42097	8.69404	2.5414
Lrig3	Lrig3	28.1149	41.2512	104.086	72.1798	34.683	88.1331	2.5411
Gm36328	Gm36328	4.87355	1	2.79281	12.1218	2.93678	7.45733	2.53929
Soat2	Soat2	1.96839	6.59044	20.7209	1	4.27941	10.8604	2.53783
Rsph4a	Rsph4a	2.93678	3.23618	13.5496	2.11218	3.08648	7.83091	2.53717
Crnn	Crnn	3.90516	4.35426	5.48201	15.4584	4.12971	10.4702	2.53534
Tas2r143	Tas2r143	1.96839	7.70853	4.58561	19.9071	4.83846	12.2464	2.53105
Odf3	Odf3	2.93678	9.9447	17.1352	15.4584	6.44074	16.2968	2.53027
Gm26669	Gm26669	3.90516	3.23618	8.17122	9.89748	3.57067	9.03435	2.53016
Cdh16	Cdh16	1	3.23618	6.37842	4.33655	2.11809	5.35749	2.5294
Gm20735	Gm20735	4.87355	3.23618	7.27482	13.234	4.05486	10.2544	2.52892
Tnfsf15	Tnfsf15	3.90516	6.59044	9.96403	16.5706	5.2478	13.2673	2.52816
Areg	Areg	35.862	36.7788	45.8201	137.799	36.3204	91.8094	2.52777
Bend4	Bend4	1.96839	3.23618	5.48201	7.67311	2.60228	6.57756	2.52761
Gm43414	Gm43414	2.93678	3.23618	4.58561	11.0097	3.08648	7.79764	2.52639
Gm15480	Gm15480	3.90516	3.23618	3.68921	14.3462	3.57067	9.01771	2.5255
Slc34a2	Slc34a2	8.7471	2.11809	10.8604	16.5706	5.43259	13.7155	2.52467
K230010J24Rik	K230010J24Rik	12.6207	17.7713	27.8921	48.8239	15.196	38.358	2.52422
Mllt11	Mllt11	11.6523	13.299	34.1669	28.8046	12.4756	31.4858	2.52378
Arsb	Arsb	2.93678	5.47235	13.5496	7.67311	4.20456	10.6114	2.52378
Helq	Helq	21.3361	23.3618	30.5813	82.1895	22.3489	56.3854	2.52295
Gm43721	Gm43721	1.96839	3.23618	1	12.1218	2.60228	6.56092	2.52122
Dtl	Dtl	20.3678	27.8341	68.2302	53.2727	24.1009	60.7514	2.52071
Smim22	Smim22	2.93678	2.11809	7.27482	5.44874	2.52743	6.36178	2.51709
Trim62	Trim62	27.1465	13.299	48.5093	53.2727	20.2227	50.891	2.51653
Rbx1-ps	Rbx1-ps	1.96839	2.11809	8.17122	2.11218	2.04324	5.1417	2.51645
Hist1h1d	Hist1h1d	5.84194	4.35426	9.06762	16.5706	5.0981	12.8191	2.51449
Chrnb1	Chrnb1	7.77871	5.47235	18.9281	14.3462	6.62553	16.6371	2.51106
Gm19688	Gm19688	1.96839	2.11809	3.68921	6.56092	2.04324	5.12507	2.50831
Zfp420	Zfp420	1.96839	2.11809	3.68921	6.56092	2.04324	5.12507	2.50831
Gmpr	Gmpr	3.90516	6.59044	10.8604	15.4584	5.2478	13.1594	2.50761
4933421O10Rik	4933421O10Rik	4.87355	3.23618	12.6532	7.67311	4.05486	10.1632	2.50642
Rbp2	Rbp2	1.96839	4.35426	8.17122	7.67311	3.16133	7.92217	2.50596
Ptpn18	Ptpn18	5.84194	1	2.79281	14.3462	3.42097	8.56951	2.50499
Gm19265	Gm19265	1.96839	6.59044	12.6532	8.78529	4.27941	10.7193	2.50484
Anxa9	Anxa9	1	2.11809	4.58561	3.22437	1.55904	3.90499	2.50473
Fbxo31	Fbxo31	1	4.35426	9.06762	4.33655	2.67713	6.70209	2.50346
1700030K09Rik	1700030K09Rik	12.6207	9.9447	24.3065	32.1412	11.2827	28.2238	2.50152
Spsb2	Spsb2	25.2097	18.8894	54.7842	55.4971	22.0495	55.1406	2.50076
Ybey	Ybey	7.77871	6.59044	17.1352	18.795	7.18458	17.9651	2.50051
Zfp395	Zfp395	45.5458	30.0703	111.258	77.7407	37.8081	94.4991	2.49944
Ace	Ace	1	4.35426	4.58561	8.78529	2.67713	6.68545	2.49724
Sorcs1	Sorcs1	14.5574	15.5351	48.5093	26.5802	15.0463	37.5448	2.49529
Gm27252	Gm27252	7.77871	9.9447	24.3065	19.9071	8.86171	22.1068	2.49464
Frmd3	Frmd3	2.93678	1	5.48201	4.33655	1.96839	4.90928	2.49406
Gm45413	Gm45413	1.96839	3.23618	10.8604	2.11218	2.60228	6.48631	2.49255
Ric3	Ric3	2.93678	3.23618	5.48201	9.89748	3.08648	7.68975	2.49143
Nlrp6	Nlrp6	1.96839	7.70853	10.8604	13.234	4.83846	12.0472	2.48989
Gm45358	Gm45358	3.90516	2.11809	11.7568	3.22437	3.01163	7.4906	2.48723
AC156790.4	AC156790.4	3.90516	4.35426	11.7568	8.78529	4.12971	10.2711	2.48711
Stc1	Stc1	2.93678	3.23618	1	14.3462	3.08648	7.67311	2.48604
Serpina4-ps1	Serpina4-ps1	1.96839	1	6.37842	1	1.48419	3.68921	2.48566
Gm26978	Gm26978	1.96839	1	6.37842	1	1.48419	3.68921	2.48566
Fam198a	Fam198a	1.96839	1	6.37842	1	1.48419	3.68921	2.48566
Lysmd1	Lysmd1	20.3678	22.2437	63.7482	42.1508	21.3057	52.9495	2.48523
Sox7	Sox7	54.2613	42.3692	134.564	105.545	48.3153	120.055	2.48482
Tmem199	Tmem199	36.8303	58.0225	134.564	101.097	47.4264	117.83	2.48449
Pigl	Pigl	12.6207	13.299	42.2345	22.1315	12.9598	32.183	2.48329
Syngap1	Syngap1	5.84194	1	12.6532	4.33655	3.42097	8.49489	2.48318
Slc30a2	Slc30a2	2.93678	4.35426	12.6532	5.44874	3.64552	9.05099	2.48277
Gm5844	Gm5844	8.7471	9.9447	19.8245	26.5802	9.3459	23.2024	2.48262
B130046B21Rik	B130046B21Rik	3.90516	2.11809	7.27482	7.67311	3.01163	7.47396	2.4817
Gm15947	Gm15947	1	5.47235	7.27482	8.78529	3.23618	8.03006	2.48134
Cutc	Cutc	17.4626	23.3618	69.1266	32.1412	20.4122	50.6339	2.48057
4933404O12Rik	4933404O12Rik	9.71549	11.0628	21.6173	29.9168	10.3891	25.767	2.48019
Pot1b	Pot1b	1	11.0628	14.446	15.4584	6.03139	14.9522	2.47907
Gtpbp10	Gtpbp10	5.84194	15.5351	29.6849	23.2437	10.6885	26.4643	2.47595
Gm28112	Gm28112	5.84194	17.7713	25.2029	33.2534	11.8066	29.2281	2.47557
Gm16755	Gm16755	1.96839	1	1.8964	5.44874	1.48419	3.67257	2.47445
AC132247.1	AC132247.1	1.96839	1	1.8964	5.44874	1.48419	3.67257	2.47445
Gm20574	Gm20574	1.96839	1	1.8964	5.44874	1.48419	3.67257	2.47445
Pilrb1	Pilrb1	1.96839	1	1.8964	5.44874	1.48419	3.67257	2.47445
Rps2-ps6	Rps2-ps6	1.96839	1	1.8964	5.44874	1.48419	3.67257	2.47445
Gm5863	Gm5863	1.96839	1	1.8964	5.44874	1.48419	3.67257	2.47445
Hmgb1-rs16	Hmgb1-rs16	1.96839	1	1.8964	5.44874	1.48419	3.67257	2.47445
Igfbp5	Igfbp5	1.96839	1	1.8964	5.44874	1.48419	3.67257	2.47445
Gm8213	Gm8213	1.96839	1	1.8964	5.44874	1.48419	3.67257	2.47445
Rcor2	Rcor2	1.96839	1	1.8964	5.44874	1.48419	3.67257	2.47445
Wnt10b	Wnt10b	6.81033	23.3618	41.3381	33.2534	15.086	37.2957	2.4722
Pm20d1	Pm20d1	4.87355	1	9.06762	5.44874	2.93678	7.25818	2.47148
9430064I24Rik	9430064I24Rik	4.87355	6.59044	11.7568	16.5706	5.73199	14.1637	2.47099
Gorab	Gorab	11.6523	2.11809	29.6849	4.33655	6.88518	17.0107	2.47063
Gm27254	Gm27254	1	3.23618	2.79281	7.67311	2.11809	5.23296	2.4706
Trim69	Trim69	1	3.23618	2.79281	7.67311	2.11809	5.23296	2.4706
Gm43013	Gm43013	1	3.23618	2.79281	7.67311	2.11809	5.23296	2.4706
Hist1h2ae	Hist1h2ae	1	3.23618	2.79281	7.67311	2.11809	5.23296	2.4706
Gm5512	Gm5512	3.90516	5.47235	5.48201	17.6828	4.68876	11.5824	2.47025
Nsl1	Nsl1	2.93678	17.7713	27.8921	23.2437	10.354	25.5679	2.46936
Nuak1	Nuak1	20.3678	34.5426	70.023	65.5067	27.4552	67.7649	2.4682
Gm4832	Gm4832	2.93678	2.11809	3.68921	8.78529	2.52743	6.23725	2.46782
Ntf5	Ntf5	1.96839	4.35426	4.58561	11.0097	3.16133	7.79764	2.46657
Fabp5l2	Fabp5l2	1.96839	4.35426	4.58561	11.0097	3.16133	7.79764	2.46657
C8g	C8g	2.93678	8.82661	13.5496	15.4584	5.88169	14.504	2.46596
Rab6b	Rab6b	4.87355	1	4.58561	9.89748	2.93678	7.24154	2.46581
Mindy4	Mindy4	23.2729	22.2437	70.023	42.1508	22.7583	56.0869	2.46446
Fam189b	Fam189b	8.7471	12.1809	21.6173	29.9168	10.464	25.767	2.46245
H2-T10	H2-T10	14.5574	6.59044	24.3065	27.6924	10.5739	25.9995	2.45882
Defb1	Defb1	52.3246	52.432	113.05	144.472	52.3783	128.761	2.45829
Id1	Id1	246.97	226.854	605.175	559.317	236.912	582.246	2.45765
Gm45855	Gm45855	1	4.35426	5.48201	7.67311	2.67713	6.57756	2.45694
Bmyc	Bmyc	4.87355	9.9447	19.8245	16.5706	7.40913	18.1975	2.4561
Rnf215	Rnf215	20.3678	4.35426	29.6849	31.029	12.361	30.3569	2.45586
C78859	C78859	1.96839	2.11809	4.58561	5.44874	2.04324	5.01717	2.4555
Jdp2	Jdp2	1.96839	2.11809	4.58561	5.44874	2.04324	5.01717	2.4555
Gm29093	Gm29093	3.90516	1	5.48201	6.56092	2.45258	6.02147	2.45516
Gm37702	Gm37702	3.90516	4.35426	3.68921	16.5706	4.12971	10.1299	2.45293
S1pr3	S1pr3	1	1	2.79281	2.11218	1	2.4525	2.4525
Rps13-ps5	Rps13-ps5	1	1	2.79281	2.11218	1	2.4525	2.4525
Aplp1	Aplp1	1	1	2.79281	2.11218	1	2.4525	2.4525
Gm22806	Gm22806	1	1	2.79281	2.11218	1	2.4525	2.4525
Mir6365	Mir6365	1	1	2.79281	2.11218	1	2.4525	2.4525
Gm18180	Gm18180	1	1	2.79281	2.11218	1	2.4525	2.4525
Gm44697	Gm44697	1	1	2.79281	2.11218	1	2.4525	2.4525
Metrn	Metrn	1	1	2.79281	2.11218	1	2.4525	2.4525
Nlrc4	Nlrc4	1	1	2.79281	2.11218	1	2.4525	2.4525
Slc36a3	Slc36a3	1	1	2.79281	2.11218	1	2.4525	2.4525
1200007C13Rik	1200007C13Rik	1	1	2.79281	2.11218	1	2.4525	2.4525
Gm13709	Gm13709	1	1	2.79281	2.11218	1	2.4525	2.4525
Gm20702	Gm20702	1	1	2.79281	2.11218	1	2.4525	2.4525
Gm24161	Gm24161	1	1	2.79281	2.11218	1	2.4525	2.4525
Gm26361	Gm26361	1	1	2.79281	2.11218	1	2.4525	2.4525
AC154276.1	AC154276.1	1	1	2.79281	2.11218	1	2.4525	2.4525
Rasgrp3	Rasgrp3	1	1	2.79281	2.11218	1	2.4525	2.4525
1700020L24Rik	1700020L24Rik	1	1	2.79281	2.11218	1	2.4525	2.4525
AC158595.1	AC158595.1	1	1	2.79281	2.11218	1	2.4525	2.4525
CT009601.1	CT009601.1	1	1	2.79281	2.11218	1	2.4525	2.4525
Fgf4	Fgf4	1	1	2.79281	2.11218	1	2.4525	2.4525
Gm10040	Gm10040	1	1	2.79281	2.11218	1	2.4525	2.4525
Gm13668	Gm13668	1	1	2.79281	2.11218	1	2.4525	2.4525
Gm14018	Gm14018	1	1	2.79281	2.11218	1	2.4525	2.4525
Gm26080	Gm26080	1	1	2.79281	2.11218	1	2.4525	2.4525
Gm28777	Gm28777	1	1	2.79281	2.11218	1	2.4525	2.4525
Gm34885	Gm34885	1	1	2.79281	2.11218	1	2.4525	2.4525
Gm36961	Gm36961	1	1	2.79281	2.11218	1	2.4525	2.4525
Gm37259	Gm37259	1	1	2.79281	2.11218	1	2.4525	2.4525
Gm43150	Gm43150	1	1	2.79281	2.11218	1	2.4525	2.4525
Gm44571	Gm44571	1	1	2.79281	2.11218	1	2.4525	2.4525
Gm5750	Gm5750	1	1	2.79281	2.11218	1	2.4525	2.4525
Mgl2	Mgl2	1	1	2.79281	2.11218	1	2.4525	2.4525
Nmu	Nmu	1	1	2.79281	2.11218	1	2.4525	2.4525
Olfr1033	Olfr1033	1	1	2.79281	2.11218	1	2.4525	2.4525
Prrt2	Prrt2	1	1	2.79281	2.11218	1	2.4525	2.4525
Skiv2l-ps1	Skiv2l-ps1	1	1	2.79281	2.11218	1	2.4525	2.4525
Slc7a15	Slc7a15	1	1	2.79281	2.11218	1	2.4525	2.4525
Gm11993	Gm11993	1	1	2.79281	2.11218	1	2.4525	2.4525
AC142114.1	AC142114.1	1	1	2.79281	2.11218	1	2.4525	2.4525
Gm17082	Gm17082	1	1	2.79281	2.11218	1	2.4525	2.4525
AC139054.1	AC139054.1	1	1	2.79281	2.11218	1	2.4525	2.4525
Gm25290	Gm25290	1	1	2.79281	2.11218	1	2.4525	2.4525
Gm42742	Gm42742	1	1	2.79281	2.11218	1	2.4525	2.4525
9230117E06Rik	9230117E06Rik	1	1	2.79281	2.11218	1	2.4525	2.4525
1700007K09Rik	1700007K09Rik	1	1	2.79281	2.11218	1	2.4525	2.4525
Gm15943	Gm15943	1	1	2.79281	2.11218	1	2.4525	2.4525
Gm37899	Gm37899	1	1	2.79281	2.11218	1	2.4525	2.4525
Gm805	Gm805	1	1	2.79281	2.11218	1	2.4525	2.4525
Gm46332	Gm46332	1	1	2.79281	2.11218	1	2.4525	2.4525
H2-T3	H2-T3	1	1	2.79281	2.11218	1	2.4525	2.4525
Nlrp4c	Nlrp4c	1	1	2.79281	2.11218	1	2.4525	2.4525
Hist1h2ab	Hist1h2ab	1	1	2.79281	2.11218	1	2.4525	2.4525
Ly6g6d	Ly6g6d	1	1	2.79281	2.11218	1	2.4525	2.4525
AC152922.1	AC152922.1	1	1	2.79281	2.11218	1	2.4525	2.4525
Gm29112	Gm29112	1	1	2.79281	2.11218	1	2.4525	2.4525
AC118733.1	AC118733.1	1	1	2.79281	2.11218	1	2.4525	2.4525
Dynlt1a	Dynlt1a	1	1	2.79281	2.11218	1	2.4525	2.4525
Rpl35a-ps5	Rpl35a-ps5	1	1	2.79281	2.11218	1	2.4525	2.4525
Gm37568	Gm37568	1	1	2.79281	2.11218	1	2.4525	2.4525
Gm26576	Gm26576	1	1	2.79281	2.11218	1	2.4525	2.4525
Lsm14b	Lsm14b	1.96839	6.59044	9.96403	11.0097	4.27941	10.4868	2.45053
Cep152	Cep152	30.0516	23.3618	70.9194	59.9458	26.7067	65.4326	2.45004
Traip	Traip	42.6407	15.5351	78.0906	64.3945	29.0879	71.2426	2.44922
Ccdc14	Ccdc14	6.81033	12.1809	33.2705	13.234	9.4956	23.2523	2.44874
Gm42820	Gm42820	2.93678	4.35426	9.06762	8.78529	3.64552	8.92646	2.44861
Pcdhga11	Pcdhga11	1	5.47235	8.17122	7.67311	3.23618	7.92217	2.448
Iqgap3	Iqgap3	39.7355	31.1884	134.564	38.8143	35.4619	86.6891	2.44457
6430511E19Rik	6430511E19Rik	10.6839	20.0075	39.5453	35.4777	15.3457	37.5115	2.44443
Phc1	Phc1	12.6207	11.0628	36.8561	21.0193	11.8417	28.9377	2.44371
Ctrb1	Ctrb1	2.93678	1	6.37842	3.22437	1.96839	4.80139	2.43925
Fam20c	Fam20c	23.2729	20.0075	46.7165	58.8336	21.6402	52.7751	2.43875
Eef1akmt3	Eef1akmt3	4.87355	5.47235	10.8604	14.3462	5.17295	12.6033	2.43639
Hist1h4f	Hist1h4f	1	2.11809	5.48201	2.11218	1.55904	3.7971	2.43553
Gm33195	Gm33195	1	2.11809	5.48201	2.11218	1.55904	3.7971	2.43553
Gm8225	Gm8225	1	2.11809	5.48201	2.11218	1.55904	3.7971	2.43553
Gm34047	Gm34047	1	2.11809	5.48201	2.11218	1.55904	3.7971	2.43553
AC101677.2	AC101677.2	1	2.11809	5.48201	2.11218	1.55904	3.7971	2.43553
Tmem177	Tmem177	8.7471	4.35426	10.8604	21.0193	6.55068	15.9399	2.43332
Fbxl14	Fbxl14	16.4942	25.5979	41.3381	61.058	21.0461	51.198	2.43267
Ankrd24	Ankrd24	1.96839	11.0628	16.2388	15.4584	6.51559	15.8486	2.43242
Cidec	Cidec	2.93678	1	1.8964	7.67311	1.96839	4.78476	2.4308
Arhgef15	Arhgef15	2.93678	1	1.8964	7.67311	1.96839	4.78476	2.4308
Brdt	Brdt	1.96839	5.47235	8.17122	9.89748	3.72037	9.03435	2.42835
Gm37368	Gm37368	10.6839	8.82661	29.6849	17.6828	9.75525	23.6838	2.4278
Nxph4	Nxph4	1	3.23618	8.17122	2.11218	2.11809	5.1417	2.42752
Scube3	Scube3	1	3.23618	8.17122	2.11218	2.11809	5.1417	2.42752
A330035P11Rik	A330035P11Rik	2.93678	3.23618	11.7568	3.22437	3.08648	7.4906	2.42691
Ppp3cc	Ppp3cc	6.81033	2.11809	11.7568	9.89748	4.46421	10.8272	2.42533
Myl6b	Myl6b	2.93678	2.11809	4.58561	7.67311	2.52743	6.12936	2.42513
AC158802.1	AC158802.1	1	2.11809	1	6.56092	1.55904	3.78046	2.42486
Gm15677	Gm15677	1	2.11809	1	6.56092	1.55904	3.78046	2.42486
Upb1	Upb1	1	2.11809	1	6.56092	1.55904	3.78046	2.42486
Gm6104	Gm6104	1	2.11809	1	6.56092	1.55904	3.78046	2.42486
Mir5125	Mir5125	1	2.11809	1	6.56092	1.55904	3.78046	2.42486
Gm28791	Gm28791	3.90516	6.59044	9.96403	15.4584	5.2478	12.7112	2.4222
Glb1l	Glb1l	42.6407	21.1256	88.8475	65.5067	31.8831	77.1771	2.42062
Cox8b	Cox8b	1	3.23618	3.68921	6.56092	2.11809	5.12507	2.41967
Gm16059	Gm16059	4.87355	3.23618	6.37842	13.234	4.05486	9.80622	2.41839
Dnah8	Dnah8	24.2413	14.4171	51.1986	42.1508	19.3292	46.6747	2.41473
BC017158	BC017158	10.6839	11.0628	31.4777	21.0193	10.8733	26.2485	2.41403
Slc9a8	Slc9a8	14.5574	13.299	35.0633	32.1412	13.9282	33.6022	2.41253
Arl9	Arl9	3.90516	1	6.37842	5.44874	2.45258	5.91358	2.41116
Ficd	Ficd	6.81033	17.7713	12.6532	46.5996	12.2908	29.6264	2.41045
Ccdc92	Ccdc92	3.90516	2.11809	9.06762	5.44874	3.01163	7.25818	2.41005
Msx2	Msx2	25.2097	28.9522	59.2662	71.0676	27.0809	65.1669	2.40638
4933425M03Rik	4933425M03Rik	6.81033	2.11809	17.1352	4.33655	4.46421	10.7359	2.40488
Gm43445	Gm43445	6.81033	1	14.446	4.33655	3.90516	9.3913	2.40484
Zfp775	Zfp775	3.90516	3.23618	7.27482	9.89748	3.57067	8.58615	2.40463
Zfp40	Zfp40	3.90516	3.23618	7.27482	9.89748	3.57067	8.58615	2.40463
Zfp995	Zfp995	7.77871	11.0628	19.8245	25.4681	9.42075	22.6463	2.40387
Hist1h1b	Hist1h1b	5.84194	7.70853	12.6532	19.9071	6.77523	16.2802	2.4029
Gpr137b-ps	Gpr137b-ps	1.96839	2.11809	5.48201	4.33655	2.04324	4.90928	2.4027
Gm13919	Gm13919	1.96839	2.11809	5.48201	4.33655	2.04324	4.90928	2.4027
Krt9	Krt9	1.96839	2.11809	5.48201	4.33655	2.04324	4.90928	2.4027
1110020A21Rik	1110020A21Rik	1.96839	2.11809	5.48201	4.33655	2.04324	4.90928	2.4027
C730034F03Rik	C730034F03Rik	5.84194	6.59044	9.96403	19.9071	6.21619	14.9356	2.40269
Smim6	Smim6	3.90516	9.9447	18.9281	14.3462	6.92493	16.6371	2.4025
Gm17841	Gm17841	1.96839	1	2.79281	4.33655	1.48419	3.56468	2.40176
Syp	Syp	1.96839	1	2.79281	4.33655	1.48419	3.56468	2.40176
Gm19287	Gm19287	1.96839	1	2.79281	4.33655	1.48419	3.56468	2.40176
Gm5920	Gm5920	1.96839	1	2.79281	4.33655	1.48419	3.56468	2.40176
Dhh	Dhh	1.96839	1	2.79281	4.33655	1.48419	3.56468	2.40176
Gm15497	Gm15497	1.96839	1	2.79281	4.33655	1.48419	3.56468	2.40176
Gm9761	Gm9761	1.96839	1	2.79281	4.33655	1.48419	3.56468	2.40176
Gm10059	Gm10059	1.96839	1	2.79281	4.33655	1.48419	3.56468	2.40176
Ppcdc	Ppcdc	30.0516	15.5351	67.3338	42.1508	22.7934	54.7423	2.40168
Gas2	Gas2	9.71549	1	18.0317	7.67311	5.35774	12.8524	2.39884
Hspb2	Hspb2	1.96839	6.59044	7.27482	13.234	4.27941	10.2544	2.39622
Gm37135	Gm37135	1.96839	2.11809	1	8.78529	2.04324	4.89265	2.39456
4933439K11Rik	4933439K11Rik	4.87355	1	6.37842	7.67311	2.93678	7.02576	2.39234
Gm12927	Gm12927	7.77871	7.70853	17.1352	19.9071	7.74362	18.5212	2.3918
Slfn14	Slfn14	2.93678	1	7.27482	2.11218	1.96839	4.6935	2.38444
Tex35	Tex35	2.93678	1	7.27482	2.11218	1.96839	4.6935	2.38444
Gm38375	Gm38375	2.93678	1	7.27482	2.11218	1.96839	4.6935	2.38444
Gm15050	Gm15050	5.84194	4.35426	9.96403	14.3462	5.0981	12.1551	2.38425
Trim3	Trim3	16.4942	11.0628	36.8561	28.8046	13.7785	32.8304	2.38272
Zswim3	Zswim3	10.6839	16.6532	25.2029	39.9265	13.6686	32.5647	2.38245
Pik3cd	Pik3cd	2.93678	2.11809	5.48201	6.56092	2.52743	6.02147	2.38245
Mfsd3	Mfsd3	12.6207	17.7713	41.3381	31.029	15.196	36.1836	2.38113
Lingo3	Lingo3	6.81033	3.23618	16.2388	7.67311	5.02325	11.956	2.38013
Ggcx	Ggcx	123.985	146.351	330.876	312.412	135.168	321.644	2.37958
Cep112	Cep112	2.93678	1	2.79281	6.56092	1.96839	4.67686	2.37599
Cd46	Cd46	2.93678	1	2.79281	6.56092	1.96839	4.67686	2.37599
Limch1	Limch1	2.93678	1	2.79281	6.56092	1.96839	4.67686	2.37599
Gm20628	Gm20628	5.84194	8.82661	21.6173	13.234	7.33428	17.4256	2.37592
BC002059	BC002059	17.4626	11.0628	51.1986	16.5706	14.2627	33.8846	2.37575
Cacna2d2	Cacna2d2	3.90516	3.23618	8.17122	8.78529	3.57067	8.47826	2.37442
Sox4	Sox4	4.87355	6.59044	11.7568	15.4584	5.73199	13.6076	2.37398
Arsi	Arsi	2.93678	15.5351	35.0633	8.78529	9.23596	21.9243	2.3738
Stra6	Stra6	14.5574	13.299	30.5813	35.4777	13.9282	33.0295	2.37141
Tdrd6	Tdrd6	1	3.23618	4.58561	5.44874	2.11809	5.01717	2.36873
Ccsap	Ccsap	1	3.23618	4.58561	5.44874	2.11809	5.01717	2.36873
4930526A20Rik	4930526A20Rik	3.90516	2.11809	5.48201	8.78529	3.01163	7.13365	2.36871
Smarcd3	Smarcd3	3.90516	1	7.27482	4.33655	2.45258	5.80569	2.36717
Catsper2	Catsper2	5.84194	9.9447	29.6849	7.67311	7.89332	18.679	2.36643
Tmem82	Tmem82	4.87355	4.35426	6.37842	15.4584	4.61391	10.9184	2.36641
H2-Q1	H2-Q1	1	2.11809	6.37842	1	1.55904	3.68921	2.36633
Dll4	Dll4	1	2.11809	6.37842	1	1.55904	3.68921	2.36633
Zswim7	Zswim7	12.6207	8.82661	29.6849	21.0193	10.7236	25.3521	2.36413
Phkg1	Phkg1	4.87355	8.82661	18.0317	14.3462	6.85008	16.1889	2.36332
Nphp3	Nphp3	16.4942	9.9447	26.9957	35.4777	13.2195	31.2367	2.36293
Npr3	Npr3	7.77871	8.82661	12.6532	26.5802	8.30266	19.6167	2.3627
Il1b	Il1b	1.96839	3.23618	9.06762	3.22437	2.60228	6.146	2.36177
BC049715	BC049715	1	8.82661	9.96403	13.234	4.91331	11.599	2.36074
Mcm10	Mcm10	20.3678	11.0628	34.1669	39.9265	15.7153	37.0467	2.35737
Dpf3	Dpf3	1	2.11809	1.8964	5.44874	1.55904	3.67257	2.35566
Ptcra	Ptcra	1	2.11809	1.8964	5.44874	1.55904	3.67257	2.35566
Rps10-ps3	Rps10-ps3	1	2.11809	1.8964	5.44874	1.55904	3.67257	2.35566
Gm44777	Gm44777	4.87355	1	7.27482	6.56092	2.93678	6.91787	2.3556
Gm45552	Gm45552	4.87355	1	7.27482	6.56092	2.93678	6.91787	2.3556
Ptger1	Ptger1	1.96839	3.23618	4.58561	7.67311	2.60228	6.12936	2.35538
Gm4335	Gm4335	1.96839	3.23618	4.58561	7.67311	2.60228	6.12936	2.35538
Fmod	Fmod	1	7.70853	7.27482	13.234	4.35426	10.2544	2.35503
B3galt6	B3galt6	5.84194	24.4798	22.5137	48.8239	15.1609	35.6688	2.35269
Gm6542	Gm6542	3.90516	4.35426	11.7568	7.67311	4.12971	9.71497	2.35246
Ubxn10	Ubxn10	5.84194	2.11809	5.48201	13.234	3.98001	9.35802	2.35125
9130017K11Rik	9130017K11Rik	1.96839	2.11809	6.37842	3.22437	2.04324	4.80139	2.34989
St6galnac1	St6galnac1	1.96839	2.11809	6.37842	3.22437	2.04324	4.80139	2.34989
Npm2	Npm2	1.96839	7.70853	7.27482	15.4584	4.83846	11.3666	2.34922
Alox8	Alox8	2.93678	2.11809	10.8604	1	2.52743	5.93022	2.34634
Mb	Mb	1	1	3.68921	1	1	2.3446	2.3446
Tbc1d30	Tbc1d30	1	1	3.68921	1	1	2.3446	2.3446
Fcor	Fcor	1	1	3.68921	1	1	2.3446	2.3446
Gm26694	Gm26694	1	1	3.68921	1	1	2.3446	2.3446
Gm3436	Gm3436	1	1	3.68921	1	1	2.3446	2.3446
Pkhd1	Pkhd1	1	1	3.68921	1	1	2.3446	2.3446
AC163667.1	AC163667.1	1	1	3.68921	1	1	2.3446	2.3446
BC025920	BC025920	1	1	3.68921	1	1	2.3446	2.3446
Ermn	Ermn	1	1	3.68921	1	1	2.3446	2.3446
Gm15282	Gm15282	1	1	3.68921	1	1	2.3446	2.3446
Gm36864	Gm36864	1	1	3.68921	1	1	2.3446	2.3446
Gm40377	Gm40377	1	1	3.68921	1	1	2.3446	2.3446
Gm43174	Gm43174	1	1	3.68921	1	1	2.3446	2.3446
Gm43850	Gm43850	1	1	3.68921	1	1	2.3446	2.3446
Gm5628	Gm5628	1	1	3.68921	1	1	2.3446	2.3446
Nkx6-2	Nkx6-2	1	1	3.68921	1	1	2.3446	2.3446
Tbx10	Tbx10	1	1	3.68921	1	1	2.3446	2.3446
Tnnc1	Tnnc1	1	1	3.68921	1	1	2.3446	2.3446
Lgi3	Lgi3	1	1	3.68921	1	1	2.3446	2.3446
Sox6os	Sox6os	1	1	3.68921	1	1	2.3446	2.3446
Gm11906	Gm11906	1	1	3.68921	1	1	2.3446	2.3446
Gm14748	Gm14748	1	1	3.68921	1	1	2.3446	2.3446
Gm15654	Gm15654	1	1	3.68921	1	1	2.3446	2.3446
Gm18734	Gm18734	1	1	3.68921	1	1	2.3446	2.3446
Gm20149	Gm20149	1	1	3.68921	1	1	2.3446	2.3446
Gm44531	Gm44531	1	1	3.68921	1	1	2.3446	2.3446
Gm9157	Gm9157	1	1	3.68921	1	1	2.3446	2.3446
Mir106b	Mir106b	1	1	3.68921	1	1	2.3446	2.3446
Pcp4	Pcp4	1	1	3.68921	1	1	2.3446	2.3446
Sspnos	Sspnos	1	1	3.68921	1	1	2.3446	2.3446
Zdhhc19	Zdhhc19	1	1	3.68921	1	1	2.3446	2.3446
1700120E14Rik	1700120E14Rik	1	1	3.68921	1	1	2.3446	2.3446
1810041L15Rik	1810041L15Rik	1	1	3.68921	1	1	2.3446	2.3446
4732463B04Rik	4732463B04Rik	1	1	3.68921	1	1	2.3446	2.3446
4930583K01Rik	4930583K01Rik	1	1	3.68921	1	1	2.3446	2.3446
AC091237.1	AC091237.1	1	1	3.68921	1	1	2.3446	2.3446
AC133598.1	AC133598.1	1	1	3.68921	1	1	2.3446	2.3446
AC134329.2	AC134329.2	1	1	3.68921	1	1	2.3446	2.3446
AC154462.2	AC154462.2	1	1	3.68921	1	1	2.3446	2.3446
AC159195.3	AC159195.3	1	1	3.68921	1	1	2.3446	2.3446
AC164315.1	AC164315.1	1	1	3.68921	1	1	2.3446	2.3446
AC167017.1	AC167017.1	1	1	3.68921	1	1	2.3446	2.3446
Car6	Car6	1	1	3.68921	1	1	2.3446	2.3446
Ccdc185	Ccdc185	1	1	3.68921	1	1	2.3446	2.3446
Cst13	Cst13	1	1	3.68921	1	1	2.3446	2.3446
CT009723.1	CT009723.1	1	1	3.68921	1	1	2.3446	2.3446
Eid2	Eid2	1	1	3.68921	1	1	2.3446	2.3446
Flg	Flg	1	1	3.68921	1	1	2.3446	2.3446
Gm10322	Gm10322	1	1	3.68921	1	1	2.3446	2.3446
Gm10764	Gm10764	1	1	3.68921	1	1	2.3446	2.3446
Gm12498	Gm12498	1	1	3.68921	1	1	2.3446	2.3446
Gm12738	Gm12738	1	1	3.68921	1	1	2.3446	2.3446
Gm14098	Gm14098	1	1	3.68921	1	1	2.3446	2.3446
Gm15208	Gm15208	1	1	3.68921	1	1	2.3446	2.3446
Gm15479	Gm15479	1	1	3.68921	1	1	2.3446	2.3446
Gm17206	Gm17206	1	1	3.68921	1	1	2.3446	2.3446
Gm19345	Gm19345	1	1	3.68921	1	1	2.3446	2.3446
Gm19560	Gm19560	1	1	3.68921	1	1	2.3446	2.3446
Gm20483	Gm20483	1	1	3.68921	1	1	2.3446	2.3446
Gm22314	Gm22314	1	1	3.68921	1	1	2.3446	2.3446
Gm24440	Gm24440	1	1	3.68921	1	1	2.3446	2.3446
Gm26645	Gm26645	1	1	3.68921	1	1	2.3446	2.3446
Gm26742	Gm26742	1	1	3.68921	1	1	2.3446	2.3446
Gm26911	Gm26911	1	1	3.68921	1	1	2.3446	2.3446
Gm27980	Gm27980	1	1	3.68921	1	1	2.3446	2.3446
Gm28979	Gm28979	1	1	3.68921	1	1	2.3446	2.3446
Gm31717	Gm31717	1	1	3.68921	1	1	2.3446	2.3446
Gm3233	Gm3233	1	1	3.68921	1	1	2.3446	2.3446
Gm33489	Gm33489	1	1	3.68921	1	1	2.3446	2.3446
Gm33994	Gm33994	1	1	3.68921	1	1	2.3446	2.3446
Gm34730	Gm34730	1	1	3.68921	1	1	2.3446	2.3446
Gm35618	Gm35618	1	1	3.68921	1	1	2.3446	2.3446
Gm44580	Gm44580	1	1	3.68921	1	1	2.3446	2.3446
Gm44946	Gm44946	1	1	3.68921	1	1	2.3446	2.3446
Gm45442	Gm45442	1	1	3.68921	1	1	2.3446	2.3446
Gm5544	Gm5544	1	1	3.68921	1	1	2.3446	2.3446
Gm5653	Gm5653	1	1	3.68921	1	1	2.3446	2.3446
Gm6081	Gm6081	1	1	3.68921	1	1	2.3446	2.3446
Gm8079	Gm8079	1	1	3.68921	1	1	2.3446	2.3446
Gm831	Gm831	1	1	3.68921	1	1	2.3446	2.3446
Gm8955	Gm8955	1	1	3.68921	1	1	2.3446	2.3446
Gpr141	Gpr141	1	1	3.68921	1	1	2.3446	2.3446
Grm8	Grm8	1	1	3.68921	1	1	2.3446	2.3446
H2-M6-ps	H2-M6-ps	1	1	3.68921	1	1	2.3446	2.3446
Hs6st2	Hs6st2	1	1	3.68921	1	1	2.3446	2.3446
Lrrc30	Lrrc30	1	1	3.68921	1	1	2.3446	2.3446
Nfam1	Nfam1	1	1	3.68921	1	1	2.3446	2.3446
Nlrp4b	Nlrp4b	1	1	3.68921	1	1	2.3446	2.3446
Olfr1410	Olfr1410	1	1	3.68921	1	1	2.3446	2.3446
Olfr429	Olfr429	1	1	3.68921	1	1	2.3446	2.3446
Plin1	Plin1	1	1	3.68921	1	1	2.3446	2.3446
Slc14a1	Slc14a1	1	1	3.68921	1	1	2.3446	2.3446
Slc17a7	Slc17a7	1	1	3.68921	1	1	2.3446	2.3446
Teddm1a	Teddm1a	1	1	3.68921	1	1	2.3446	2.3446
Trmt112-ps2	Trmt112-ps2	1	1	3.68921	1	1	2.3446	2.3446
Vmn1r82	Vmn1r82	1	1	3.68921	1	1	2.3446	2.3446
Xkr4	Xkr4	1	1	3.68921	1	1	2.3446	2.3446
4931423N10Rik	4931423N10Rik	1	1	3.68921	1	1	2.3446	2.3446
Hcn2	Hcn2	1	1	3.68921	1	1	2.3446	2.3446
Mroh4	Mroh4	1	1	3.68921	1	1	2.3446	2.3446
AC134860.2	AC134860.2	1	1	3.68921	1	1	2.3446	2.3446
C4b	C4b	1	1	3.68921	1	1	2.3446	2.3446
Gm10182	Gm10182	1	1	3.68921	1	1	2.3446	2.3446
Gm16570	Gm16570	1	1	3.68921	1	1	2.3446	2.3446
Gm15974	Gm15974	1	1	3.68921	1	1	2.3446	2.3446
Gm24233	Gm24233	1	1	3.68921	1	1	2.3446	2.3446
1110025M09Rik	1110025M09Rik	1	1	3.68921	1	1	2.3446	2.3446
AC151275.1	AC151275.1	1	1	3.68921	1	1	2.3446	2.3446
AC154747.2	AC154747.2	1	1	3.68921	1	1	2.3446	2.3446
AC155709.2	AC155709.2	1	1	3.68921	1	1	2.3446	2.3446
Aif1	Aif1	1	1	3.68921	1	1	2.3446	2.3446
Fcho1	Fcho1	1	1	3.68921	1	1	2.3446	2.3446
Fgf5	Fgf5	1	1	3.68921	1	1	2.3446	2.3446
Gm11274	Gm11274	1	1	3.68921	1	1	2.3446	2.3446
Gm13597	Gm13597	1	1	3.68921	1	1	2.3446	2.3446
Gm14248	Gm14248	1	1	3.68921	1	1	2.3446	2.3446
Gm15743	Gm15743	1	1	3.68921	1	1	2.3446	2.3446
Gm17983	Gm17983	1	1	3.68921	1	1	2.3446	2.3446
Gm42913	Gm42913	1	1	3.68921	1	1	2.3446	2.3446
Hoxd4	Hoxd4	1	1	3.68921	1	1	2.3446	2.3446
Gm35657	Gm35657	1	1	3.68921	1	1	2.3446	2.3446
Gm37618	Gm37618	1	1	3.68921	1	1	2.3446	2.3446
Asphd1	Asphd1	1	1	3.68921	1	1	2.3446	2.3446
AC125399.1	AC125399.1	1	1	3.68921	1	1	2.3446	2.3446
AC159624.1	AC159624.1	1	1	3.68921	1	1	2.3446	2.3446
Eif1-ps3	Eif1-ps3	1	1	3.68921	1	1	2.3446	2.3446
Sct	Sct	1	1	3.68921	1	1	2.3446	2.3446
Grrp1	Grrp1	1	1	3.68921	1	1	2.3446	2.3446
Gm30346	Gm30346	1	1	3.68921	1	1	2.3446	2.3446
Pcdhga4	Pcdhga4	1	1	3.68921	1	1	2.3446	2.3446
8030423F21Rik	8030423F21Rik	1	1	3.68921	1	1	2.3446	2.3446
Cacna2d3	Cacna2d3	1	1	3.68921	1	1	2.3446	2.3446
Fam178b	Fam178b	11.6523	5.47235	13.5496	26.5802	8.56231	20.0649	2.3434
Qrsl1	Qrsl1	38.7671	12.1809	72.7122	46.5996	25.474	59.6559	2.34183
Gm7292	Gm7292	1.96839	2.11809	1.8964	7.67311	2.04324	4.78476	2.34175
Gm15751	Gm15751	1.96839	2.11809	1.8964	7.67311	2.04324	4.78476	2.34175
Pard6a	Pard6a	10.6839	11.0628	24.3065	26.5802	10.8733	25.4434	2.33998
Rbmx2	Rbmx2	3.90516	6.59044	13.5496	11.0097	5.2478	12.2797	2.33996
Wrb	Wrb	28.1149	35.6607	87.0547	62.1702	31.8878	74.6124	2.33984
Rcan3	Rcan3	19.3994	28.9522	47.6129	65.5067	24.1758	56.5598	2.33952
Apcdd1	Apcdd1	18.431	37.8969	67.3338	64.3945	28.1639	65.8642	2.3386
Gm11745	Gm11745	3.90516	2.11809	10.8604	3.22437	3.01163	7.0424	2.3384
4933431K14Rik	4933431K14Rik	5.84194	3.23618	13.5496	7.67311	4.53906	10.6114	2.33779
Ccdc24	Ccdc24	10.6839	6.59044	17.1352	23.2437	8.63716	20.1895	2.33751
H2-DMb1	H2-DMb1	1	4.35426	8.17122	4.33655	2.67713	6.25389	2.33604
Rnls	Rnls	5.84194	6.59044	18.0317	11.0097	6.21619	14.5207	2.33594
Gm12258	Gm12258	2.93678	8.82661	15.3424	12.1218	5.88169	13.7321	2.33473
Gm3081	Gm3081	4.87355	2.11809	10.8604	5.44874	3.49582	8.15458	2.33267
Ovca2	Ovca2	9.71549	4.35426	16.2388	16.5706	7.03488	16.4047	2.33191
Gm15675	Gm15675	3.90516	12.1809	19.8245	17.6828	8.04302	18.7536	2.33166
Lix1l	Lix1l	1.96839	1	3.68921	3.22437	1.48419	3.45679	2.32907
Gm6276	Gm6276	1.96839	1	3.68921	3.22437	1.48419	3.45679	2.32907
AV099323	AV099323	1.96839	1	3.68921	3.22437	1.48419	3.45679	2.32907
Klhl22	Klhl22	1.96839	1	3.68921	3.22437	1.48419	3.45679	2.32907
Rps12-ps10	Rps12-ps10	5.84194	2.11809	10.8604	7.67311	3.98001	9.26677	2.32833
Efemp2	Efemp2	19.3994	16.6532	39.5453	44.3752	18.0263	41.9603	2.32772
Slc2a9	Slc2a9	31.02	27.8341	64.6446	72.1798	29.4271	68.4122	2.32481
Pde4c	Pde4c	3.90516	7.70853	12.6532	14.3462	5.80684	13.4997	2.3248
St3gal3	St3gal3	3.90516	1	8.17122	3.22437	2.45258	5.6978	2.32318
Gm21596	Gm21596	2.93678	1	3.68921	5.44874	1.96839	4.56897	2.32118
Cct8l1	Cct8l1	2.93678	1	3.68921	5.44874	1.96839	4.56897	2.32118
Ubac1	Ubac1	23.2729	22.2437	51.1986	54.3849	22.7583	52.7917	2.31967
Fastkd2	Fastkd2	46.5142	26.716	98.7079	71.0676	36.6151	84.8878	2.31838
Glrb	Glrb	1	3.23618	5.48201	4.33655	2.11809	4.90928	2.31779
Hk1os	Hk1os	3.90516	8.82661	20.7209	8.78529	6.36589	14.7531	2.31752
Trim43c	Trim43c	3.90516	1	3.68921	7.67311	2.45258	5.68116	2.3164
Gm15843	Gm15843	3.90516	1	3.68921	7.67311	2.45258	5.68116	2.3164
Stpg3	Stpg3	4.87355	3.23618	14.446	4.33655	4.05486	9.3913	2.31606
Mylip	Mylip	293.453	459.416	864.236	878.514	376.435	871.375	2.31481
Itfg2	Itfg2	64.9136	40.1331	146.217	96.6479	52.5233	121.433	2.31197
Matn4	Matn4	33.9252	40.1331	70.023	101.097	37.0291	85.5598	2.31061
Kctd18	Kctd18	22.3045	40.1331	75.4014	68.8433	31.2188	72.1223	2.31022
Gm39147	Gm39147	1	5.47235	7.27482	7.67311	3.23618	7.47396	2.30951
Jade2	Jade2	22.3045	27.8341	73.6086	42.1508	25.0693	57.8797	2.30879
Pik3r1	Pik3r1	134.638	194.429	360.458	399.162	164.533	379.81	2.30841
E230020D15Rik	E230020D15Rik	9.71549	18.8894	53.8878	12.1218	14.3024	33.0048	2.30763
Disp1	Disp1	52.3246	60.2587	155.181	104.433	56.2916	129.807	2.30598
Fzd2	Fzd2	3.90516	9.9447	15.3424	16.5706	6.92493	15.9565	2.30421
Tubgcp5	Tubgcp5	53.2929	72.5576	140.839	148.921	62.9253	144.88	2.30241
Mdc1	Mdc1	75.5659	70.3214	164.145	171.164	72.9436	167.655	2.29842
Bcl2	Bcl2	9.71549	13.299	25.2029	27.6924	11.5072	26.4477	2.29835
Tef	Tef	157.879	132.934	351.493	316.86	145.407	334.177	2.29822
Tgds	Tgds	16.4942	21.1256	47.6129	38.8143	18.8099	43.2136	2.29739
Gm25571	Gm25571	1.96839	2.11809	7.27482	2.11218	2.04324	4.6935	2.29709
Smoc1	Smoc1	1.96839	2.11809	7.27482	2.11218	2.04324	4.6935	2.29709
Gm43088	Gm43088	2.93678	2.11809	7.27482	4.33655	2.52743	5.80569	2.29707
Gm9908	Gm9908	3.90516	2.11809	7.27482	6.56092	3.01163	6.91787	2.29706
Ifitm5	Ifitm5	5.84194	2.11809	7.27482	11.0097	3.98001	9.14224	2.29704
D730045B01Rik	D730045B01Rik	4.87355	13.299	20.7209	21.0193	9.08626	20.8701	2.29689
Gne	Gne	24.2413	18.8894	60.1626	38.8143	21.5654	49.4884	2.29481
Tfb1m	Tfb1m	7.77871	16.6532	26.0993	29.9168	12.216	28.008	2.29274
Cyp17a1	Cyp17a1	13.589	11.0628	33.2705	23.2437	12.3259	28.2571	2.29249
Sgo1	Sgo1	7.77871	7.70853	18.9281	16.5706	7.74362	17.7493	2.29212
Fgf15	Fgf15	1	6.59044	6.37842	11.0097	3.79522	8.69404	2.29079
Fbxw17	Fbxw17	22.3045	5.47235	31.4777	32.1412	13.8884	31.8094	2.29035
Sh3tc2	Sh3tc2	5.84194	3.23618	15.3424	5.44874	4.53906	10.3956	2.29025
Brf2	Brf2	1	4.35426	4.58561	7.67311	2.67713	6.12936	2.28952
Zfp109	Zfp109	3.90516	3.23618	15.3424	1	3.57067	8.17122	2.28843
Ankrd29	Ankrd29	31.02	14.4171	44.0273	59.9458	22.7185	51.9866	2.28829
Stfa3	Stfa3	29.0832	27.8341	45.8201	84.4139	28.4587	65.117	2.28812
Gm43335	Gm43335	6.81033	3.23618	10.8604	12.1218	5.02325	11.4911	2.28759
AC173482.2	AC173482.2	1	2.11809	2.79281	4.33655	1.55904	3.56468	2.28645
4833417C18Rik	4833417C18Rik	1	2.11809	2.79281	4.33655	1.55904	3.56468	2.28645
Adgrf3	Adgrf3	1	2.11809	2.79281	4.33655	1.55904	3.56468	2.28645
Gm44674	Gm44674	1	2.11809	2.79281	4.33655	1.55904	3.56468	2.28645
Gm27048	Gm27048	1	2.11809	2.79281	4.33655	1.55904	3.56468	2.28645
1810019N24Rik	1810019N24Rik	1	2.11809	2.79281	4.33655	1.55904	3.56468	2.28645
Acta1	Acta1	1	2.11809	2.79281	4.33655	1.55904	3.56468	2.28645
Zfp955b	Zfp955b	7.77871	8.82661	18.0317	19.9071	8.30266	18.9694	2.28474
Bub1	Bub1	20.3678	11.0628	52.9914	18.795	15.7153	35.8932	2.28397
Gm42822	Gm42822	7.77871	6.59044	16.2388	16.5706	7.18458	16.4047	2.28332
Pomgnt1	Pomgnt1	31.02	23.3618	66.4374	57.7214	27.1909	62.0794	2.2831
Kctd7	Kctd7	3.90516	8.82661	18.0317	11.0097	6.36589	14.5207	2.28101
Gm26739	Gm26739	5.84194	1	4.58561	11.0097	3.42097	7.79764	2.27936
AA543186	AA543186	3.90516	3.23618	6.37842	9.89748	3.57067	8.13795	2.27911
Slc25a31	Slc25a31	1.96839	5.47235	8.17122	8.78529	3.72037	8.47826	2.27888
Zfp94	Zfp94	2.93678	3.23618	6.37842	7.67311	3.08648	7.02576	2.27631
Ccdc113	Ccdc113	11.6523	4.35426	24.3065	12.1218	8.00326	18.2142	2.27584
Trub2	Trub2	32.9568	32.3065	80.7798	67.7311	32.6316	74.2555	2.27557
Gm9774	Gm9774	25.2097	30.0703	45.8201	79.9651	27.64	62.8926	2.27542
AW554918	AW554918	19.3994	27.8341	61.9554	45.4874	23.6167	53.7214	2.27472
Aspm	Aspm	54.2613	24.4798	111.258	67.7311	39.3706	89.4943	2.27313
Gm44510	Gm44510	4.87355	4.35426	9.96403	11.0097	4.61391	10.4868	2.27288
Itgal	Itgal	1.96839	3.23618	6.37842	5.44874	2.60228	5.91358	2.27246
Samd14	Samd14	1.96839	3.23618	6.37842	5.44874	2.60228	5.91358	2.27246
Tnfaip8l2	Tnfaip8l2	3.90516	1	4.58561	6.56092	2.45258	5.57327	2.27241
Ccno	Ccno	12.6207	7.70853	20.7209	25.4681	10.1646	23.0945	2.27205
Ces2e	Ces2e	8.7471	9.9447	26.9957	15.4584	9.3459	21.227	2.27127
Zfp825	Zfp825	5.84194	2.11809	8.17122	9.89748	3.98001	9.03435	2.26993
Chst14	Chst14	6.81033	3.23618	16.2388	6.56092	5.02325	11.3999	2.26942
Wbp1	Wbp1	18.431	24.4798	52.9914	44.3752	21.4554	48.6833	2.26904
Meis3	Meis3	1	3.23618	6.37842	3.22437	2.11809	4.80139	2.26685
D330023K18Rik	D330023K18Rik	2.93678	4.35426	9.96403	6.56092	3.64552	8.26248	2.26647
Gm5614	Gm5614	2.93678	1	4.58561	4.33655	1.96839	4.46108	2.26636
Gm14585	Gm14585	2.93678	1	4.58561	4.33655	1.96839	4.46108	2.26636
Gm18284	Gm18284	7.77871	1	9.96403	9.89748	4.38936	9.93075	2.26246
Snx32	Snx32	7.77871	15.5351	35.0633	17.6828	11.6569	26.373	2.26243
Xcr1	Xcr1	4.87355	2.11809	3.68921	12.1218	3.49582	7.90553	2.26142
Fbxw10	Fbxw10	9.71549	13.299	28.7885	23.2437	11.5072	26.0161	2.26085
Trmt6	Trmt6	37.7987	34.5426	96.9151	66.6189	36.1707	81.767	2.26059
G730003C15Rik	G730003C15Rik	1	3.23618	1.8964	7.67311	2.11809	4.78476	2.259
B4galt4	B4galt4	5.84194	1	14.446	1	3.42097	7.72302	2.25755
Slc4a3	Slc4a3	1.96839	1	4.58561	2.11218	1.48419	3.3489	2.25637
Hcn3	Hcn3	1.96839	1	4.58561	2.11218	1.48419	3.3489	2.25637
Cyp11b1	Cyp11b1	1.96839	1	4.58561	2.11218	1.48419	3.3489	2.25637
Gm42866	Gm42866	1.96839	1	4.58561	2.11218	1.48419	3.3489	2.25637
Gm17022	Gm17022	2.93678	5.47235	4.58561	14.3462	4.20456	9.46591	2.25134
Nrde2	Nrde2	17.4626	11.0628	47.6129	16.5706	14.2627	32.0918	2.25005
Parp16	Parp16	19.3994	11.0628	34.1669	34.3655	15.2311	34.2662	2.24976
5430421F17Rik	5430421F17Rik	1.96839	2.11809	8.17122	1	2.04324	4.58561	2.24429
A930036K24Rik	A930036K24Rik	1.96839	2.11809	8.17122	1	2.04324	4.58561	2.24429
Zkscan8	Zkscan8	54.2613	15.5351	70.9194	85.526	34.8982	78.2227	2.24145
Tpt1-ps2	Tpt1-ps2	2.93678	3.23618	7.27482	6.56092	3.08648	6.91787	2.24135
Nfe2l3	Nfe2l3	9.71549	14.4171	29.6849	24.3559	12.0663	27.0204	2.23933
Gm17207	Gm17207	10.6839	5.47235	16.2388	19.9071	8.07811	18.073	2.23728
Ptdss2	Ptdss2	33.9252	34.5426	103.19	49.9361	34.2339	76.563	2.23647
Gemin2	Gemin2	32.9568	28.9522	71.8158	66.6189	30.9545	69.2174	2.2361
Gm37666	Gm37666	2.93678	3.23618	2.79281	11.0097	3.08648	6.90123	2.23596
Aff3	Aff3	19.3994	28.9522	54.7842	53.2727	24.1758	54.0284	2.23482
Gm11769	Gm11769	1.96839	7.70853	7.27482	14.3462	4.83846	10.8105	2.23429
Gm12905	Gm12905	1.96839	3.23618	7.27482	4.33655	2.60228	5.80569	2.231
Pla2g10	Pla2g10	1.96839	3.23618	7.27482	4.33655	2.60228	5.80569	2.231
Mafb	Mafb	243.097	359.906	544.22	800.661	301.502	672.44	2.23031
1700001P01Rik	1700001P01Rik	8.7471	11.0628	19.8245	24.3559	9.90495	22.0902	2.23022
Slc38a6	Slc38a6	7.77871	4.35426	17.1352	9.89748	6.06649	13.5164	2.22804
Gm37170	Gm37170	25.2097	32.3065	63.7482	64.3945	28.7581	64.0714	2.22794
Zc3h8	Zc3h8	5.84194	13.299	21.6173	21.0193	9.57045	21.3183	2.22751
Gm15945	Gm15945	2.93678	5.47235	5.48201	13.234	4.20456	9.35802	2.22568
Nemp2	Nemp2	36.8303	40.1331	83.4691	87.7504	38.4817	85.6097	2.22469
1700067K01Rik	1700067K01Rik	4.87355	6.59044	14.446	11.0097	5.73199	12.7279	2.22049
Qsox2	Qsox2	29.0832	49.0778	92.4331	81.0773	39.0805	86.7552	2.21991
Dapk2	Dapk2	39.7355	39.015	78.0906	96.6479	39.3752	87.3693	2.21889
Zfp90	Zfp90	3.90516	3.23618	8.17122	7.67311	3.57067	7.92217	2.21868
Scara3	Scara3	19.3994	27.8341	59.2662	45.4874	23.6167	52.3768	2.21778
Igfals	Igfals	1	11.0628	9.06762	17.6828	6.03139	13.3752	2.2176
Mzb1	Mzb1	1	2.11809	3.68921	3.22437	1.55904	3.45679	2.21725
AC139323.1	AC139323.1	1	2.11809	3.68921	3.22437	1.55904	3.45679	2.21725
AC161271.1	AC161271.1	1	2.11809	3.68921	3.22437	1.55904	3.45679	2.21725
Gm20621	Gm20621	1	2.11809	3.68921	3.22437	1.55904	3.45679	2.21725
Oscar	Oscar	1	2.11809	3.68921	3.22437	1.55904	3.45679	2.21725
Gm12732	Gm12732	1	2.11809	3.68921	3.22437	1.55904	3.45679	2.21725
Gm15541	Gm15541	1	2.11809	3.68921	3.22437	1.55904	3.45679	2.21725
Col16a1	Col16a1	138.511	128.462	300.399	291.28	133.487	295.839	2.21625
Gm45187	Gm45187	1	3.23618	7.27482	2.11218	2.11809	4.6935	2.21591
Amot	Amot	2.93678	9.9447	10.8604	17.6828	6.44074	14.2716	2.21583
Bicdl2	Bicdl2	69.7555	97.1555	206.276	163.379	83.4555	184.828	2.21468
Gm24620	Gm24620	3.90516	5.47235	10.8604	9.89748	4.68876	10.379	2.21358
Gm12482	Gm12482	7.77871	1	11.7568	7.67311	4.38936	9.71497	2.2133
Gm15635	Gm15635	2.93678	2.11809	9.06762	2.11218	2.52743	5.5899	2.21169
2310015K22Rik	2310015K22Rik	2.93678	2.11809	9.06762	2.11218	2.52743	5.5899	2.21169
Gm19427	Gm19427	2.93678	1	5.48201	3.22437	1.96839	4.35319	2.21155
Cnr1	Cnr1	2.93678	1	5.48201	3.22437	1.96839	4.35319	2.21155
Gm37035	Gm37035	5.84194	2.11809	5.48201	12.1218	3.98001	8.80193	2.21153
Fer1l5	Fer1l5	17.4626	17.7713	32.3741	45.4874	17.617	38.9307	2.20985
Kdm4d	Kdm4d	1	3.23618	2.79281	6.56092	2.11809	4.67686	2.20806
Gm16208	Gm16208	1	3.23618	2.79281	6.56092	2.11809	4.67686	2.20806
Gm37176	Gm37176	2.93678	3.23618	8.17122	5.44874	3.08648	6.80998	2.20639
Fam184b	Fam184b	2.93678	3.23618	8.17122	5.44874	3.08648	6.80998	2.20639
Tbc1d16	Tbc1d16	5.84194	14.4171	26.9957	17.6828	10.1295	22.3392	2.20536
Tnfrsf25	Tnfrsf25	12.6207	6.59044	13.5496	28.8046	9.60555	21.1771	2.20468
Zfp984	Zfp984	2.93678	5.47235	10.8604	7.67311	4.20456	9.26677	2.20398
Gm38253	Gm38253	2.93678	1	1	7.67311	1.96839	4.33655	2.2031
Lsp1	Lsp1	2.93678	1	1	7.67311	1.96839	4.33655	2.2031
Stag3	Stag3	4.87355	1	6.37842	6.56092	2.93678	6.46967	2.20298
4930513N20Rik	4930513N20Rik	12.6207	16.6532	27.8921	36.5899	14.6369	32.241	2.20271
Trpt1	Trpt1	31.9884	23.3618	61.9554	59.9458	27.6751	60.9506	2.20236
Mycl	Mycl	50.3878	70.3214	152.492	113.331	60.3546	132.911	2.20217
Rbpjl	Rbpjl	52.3246	92.6832	166.835	152.257	72.5039	159.546	2.20051
Gm38115	Gm38115	31.02	13.299	43.1309	54.3849	22.1595	48.7579	2.20032
B930036N10Rik	B930036N10Rik	9.71549	9.9447	14.446	28.8046	9.8301	21.6253	2.19991
Endog	Endog	4.87355	2.11809	5.48201	9.89748	3.49582	7.68975	2.1997
Lrp8os2	Lrp8os2	6.81033	6.59044	16.2388	13.234	6.70038	14.7364	2.19934
1700001K19Rik	1700001K19Rik	5.84194	18.8894	42.2345	12.1218	12.3657	27.1782	2.19787
Rwdd2b	Rwdd2b	18.431	20.0075	51.1986	33.2534	19.2192	42.226	2.19707
9430097D07Rik	9430097D07Rik	3.90516	8.82661	22.5137	5.44874	6.36589	13.9812	2.19627
Mrps2	Mrps2	26.1781	21.1256	58.3698	45.4874	23.6518	51.9286	2.19554
Tceanc2	Tceanc2	30.0516	30.0703	98.7079	33.2534	30.061	65.9806	2.19489
Gpr4	Gpr4	3.90516	5.47235	16.2388	4.33655	4.68876	10.2877	2.19412
Slc25a19	Slc25a19	39.7355	33.4245	77.1942	83.3017	36.58	80.248	2.19376
Gm8599	Gm8599	1.96839	4.35426	11.7568	2.11218	3.16133	6.93451	2.19354
Pard6b	Pard6b	92.9968	75.9119	161.456	208.979	84.4544	185.217	2.19311
Pik3c2b	Pik3c2b	22.3045	17.7713	27.8921	59.9458	20.0379	43.9189	2.19179
Axin2	Axin2	40.7039	49.0778	107.672	88.8626	44.8908	98.2673	2.18903
Gm19409	Gm19409	3.90516	3.23618	9.06762	6.56092	3.57067	7.81427	2.18846
Gm45354	Gm45354	3.90516	3.23618	9.06762	6.56092	3.57067	7.81427	2.18846
Gm5417	Gm5417	1.96839	4.35426	7.27482	6.56092	3.16133	6.91787	2.18828
P2rx2	P2rx2	7.77871	2.11809	11.7568	9.89748	4.9484	10.8272	2.18801
Pex2	Pex2	75.5659	93.8013	235.858	134.462	84.6836	185.16	2.18649
Rdh5	Rdh5	30.0516	28.9522	74.505	54.3849	29.5019	64.4449	2.18443
Il27ra	Il27ra	3.90516	1	6.37842	4.33655	2.45258	5.35749	2.18443
Hexim2	Hexim2	3.90516	2.11809	5.48201	7.67311	3.01163	6.57756	2.18406
Gmcl1	Gmcl1	9.71549	18.8894	26.9957	35.4777	14.3024	31.2367	2.18401
Gm43360	Gm43360	5.84194	4.35426	4.58561	17.6828	5.0981	11.1342	2.18399
B230319C09Rik	B230319C09Rik	3.90516	3.23618	4.58561	11.0097	3.57067	7.79764	2.1838
Ppih	Ppih	10.6839	18.8894	41.3381	23.2437	14.7866	32.2909	2.18379
Fam217b	Fam217b	1.96839	1	5.48201	1	1.48419	3.24101	2.18368
Mslnl	Mslnl	1.96839	1	5.48201	1	1.48419	3.24101	2.18368
Plcl1	Plcl1	1.96839	1	5.48201	1	1.48419	3.24101	2.18368
Gm13121	Gm13121	1.96839	1	5.48201	1	1.48419	3.24101	2.18368
Tfpi	Tfpi	1.96839	1	5.48201	1	1.48419	3.24101	2.18368
Trim60	Trim60	1.96839	1	5.48201	1	1.48419	3.24101	2.18368
Unc5c	Unc5c	1.96839	1	5.48201	1	1.48419	3.24101	2.18368
Gm10629	Gm10629	1.96839	1	5.48201	1	1.48419	3.24101	2.18368
Gm29797	Gm29797	1.96839	1	5.48201	1	1.48419	3.24101	2.18368
Oog4	Oog4	1.96839	1	5.48201	1	1.48419	3.24101	2.18368
Pik3cg	Pik3cg	1.96839	1	5.48201	1	1.48419	3.24101	2.18368
Gm6169	Gm6169	1.96839	1	5.48201	1	1.48419	3.24101	2.18368
Gm24403	Gm24403	1.96839	1	5.48201	1	1.48419	3.24101	2.18368
Dmbx1	Dmbx1	1.96839	1	5.48201	1	1.48419	3.24101	2.18368
Gm10313	Gm10313	1.96839	1	5.48201	1	1.48419	3.24101	2.18368
Gm7368	Gm7368	1.96839	2.11809	4.58561	4.33655	2.04324	4.46108	2.18334
AC160980.2	AC160980.2	1.96839	2.11809	4.58561	4.33655	2.04324	4.46108	2.18334
Gm44975	Gm44975	1.96839	2.11809	4.58561	4.33655	2.04324	4.46108	2.18334
Was	Was	1.96839	3.23618	3.68921	7.67311	2.60228	5.68116	2.18315
Them6	Them6	1.96839	4.35426	2.79281	11.0097	3.16133	6.90123	2.18302
Zfp961	Zfp961	6.81033	16.6532	27.8921	23.2437	11.7318	25.5679	2.17937
Dph7	Dph7	29.0832	27.8341	76.2978	47.7118	28.4587	62.0048	2.17877
AC124426.1	AC124426.1	3.90516	1	1.8964	8.78529	2.45258	5.34085	2.17764
Ankrd34b	Ankrd34b	3.90516	1	1.8964	8.78529	2.45258	5.34085	2.17764
Nek3	Nek3	9.71549	4.35426	20.7209	9.89748	7.03488	15.3092	2.17618
Pou3f1	Pou3f1	30.0516	25.5979	70.023	51.0483	27.8248	60.5357	2.1756
Fam111a	Fam111a	10.6839	7.70853	27.8921	12.1218	9.1962	20.007	2.17557
Gm26522	Gm26522	5.84194	7.70853	16.2388	13.234	6.77523	14.7364	2.17505
Pidd1	Pidd1	1.96839	12.1809	10.8604	19.9071	7.07463	15.3838	2.1745
9430034N14Rik	9430034N14Rik	4.87355	2.11809	10.8604	4.33655	3.49582	7.59849	2.17359
Gm40155	Gm40155	2.93678	4.35426	8.17122	7.67311	3.64552	7.92217	2.17312
Dock2	Dock2	1.96839	1	1	5.44874	1.48419	3.22437	2.17247
Zfp957	Zfp957	1.96839	1	1	5.44874	1.48419	3.22437	2.17247
Tex46	Tex46	1.96839	1	1	5.44874	1.48419	3.22437	2.17247
Gm45251	Gm45251	1.96839	1	1	5.44874	1.48419	3.22437	2.17247
Armc3	Armc3	1.96839	1	1	5.44874	1.48419	3.22437	2.17247
Oacyl	Oacyl	1.96839	1	1	5.44874	1.48419	3.22437	2.17247
Timm8a2	Timm8a2	1.96839	1	1	5.44874	1.48419	3.22437	2.17247
Gm34574	Gm34574	1.96839	1	1	5.44874	1.48419	3.22437	2.17247
4930480K23Rik	4930480K23Rik	11.6523	11.0628	26.0993	23.2437	11.3575	24.6715	2.17226
Unc119	Unc119	9.71549	4.35426	11.7568	18.795	7.03488	15.2759	2.17145
Gm4675	Gm4675	1	5.47235	6.37842	7.67311	3.23618	7.02576	2.17101
Aldh3a2	Aldh3a2	46.5142	44.6054	125.6	72.1798	45.5598	98.8899	2.17055
2210011C24Rik	2210011C24Rik	5.84194	13.299	21.6173	19.9071	9.57045	20.7622	2.16941
AC163038.2	AC163038.2	5.84194	3.23618	15.3424	4.33655	4.53906	9.8395	2.16774
Zfp422	Zfp422	23.2729	24.4798	64.6446	38.8143	23.8764	51.7294	2.16655
[truncated: 50,999 more rows]
