# Supplementary material for: Neonatal-derived IL-17 producing dermal γδ T cells are required to prevent spontaneous atopic dermatitis
Source: eLife. 2020 Feb 17;9:e51188. doi: 10.7554/eLife.51188 (PMC7025821; doi:10.7554/eLife.51188)
Supplement: Figure 3—source data 2. [file elife-51188-fig3-data2.xlsx]

## Sheet: 7wk KC RNA-seq
Source Data for Figure 3A lower panel. Data are expressed as normalized RPKM+1.
Gene_Symbol	DESCRIPTION	Skin.KC.7w.LMC#1	Skin.KC.7w.LMC#2	Skin.KC.7w.LMC#3	Skin.KC.7w.KO#1	Skin.KC.7w.KO#2	Skin.KC.7w.KO#3	Avg_LMC	Avg_KO	FC_KOvsLMC
Cdsn	Cdsn	10.1991	4.205	1	95.7804	38.9509	32.8138	5.13471	55.8484	10.8766
Zfp518b	Zfp518b	1	1	1	7.83102	6.12851	11.2259	1	8.39513	8.39513
Col5a2	Col5a2	1	1	1	5.26939	3.0514	15.7707	1	8.03049	8.03049
Il19	Il19	1	1	1	1	2.0257	16.9069	1	6.6442	6.6442
Cd74	Cd74	6.25665	15.9567	107.187	12.1004	121.007	658.863	43.1333	263.99	6.12033
Car2	Car2	6.25665	4.205	1.96533	55.6481	1	18.0431	4.14233	24.8971	6.01041
Pde6b	Pde6b	1	1	1	7.83102	8.17991	1	1	5.67031	5.67031
Gm15775	Gm15775	1	1	1	3.56163	1	12.3621	1	5.64123	5.64123
Arhgap6	Arhgap6	1	1	3.896	12.1004	11.257	8.95344	1.96533	10.7703	5.48013
Entpd3	Entpd3	1	1	1	4.41551	3.0514	8.95344	1	5.47345	5.47345
Aldh1a3	Aldh1a3	1	1	1.96533	11.2465	1	8.95344	1.32178	7.06666	5.34633
Pp2d1	Pp2d1	1	2.06833	2.93067	4.41551	12.2827	14.6345	1.99967	10.4442	5.22299
Gp5	Gp5	1	3.13667	1	6.12326	9.20561	11.2259	1.71222	8.85158	5.16964
Akna	Akna	2.31416	2.06833	1.96533	13.8082	5.1028	13.4983	2.11594	10.8031	5.10556
Fstl4	Fstl4	1	1	1	1.85388	4.0771	8.95344	1	4.96147	4.96147
Gsdmc	Gsdmc	3.62832	13.82	8.72267	10.3926	35.8738	80.5344	8.72367	42.267	4.84509
C030034I22Rik	C030034I22Rik	1	1	1	4.41551	1	8.95344	1	4.78965	4.78965
Gm45399	Gm45399	1	2.06833	1	6.97714	9.20561	3.27241	1.35611	6.48505	4.7821
H2-Aa	H2-Aa	10.1991	28.7767	74.3654	21.4931	83.0561	423.669	37.7804	176.073	4.66042
Pdk4	Pdk4	1	15.9567	4.86134	13.8082	32.7967	54.4017	7.27267	33.6689	4.62951
AC153504.1	AC153504.1	1	1	1	6.97714	1	5.54482	1	4.50732	4.50732
Pappa	Pappa	2.31416	1	2.93067	8.68489	9.20561	10.0896	2.08161	9.32672	4.48053
Kif5c	Kif5c	1	2.06833	1	4.41551	8.17991	5.54482	1.35611	6.04675	4.45889
Ret	Ret	1	1	1	2.70775	6.12851	4.40862	1	4.41496	4.41496
AF529169	AF529169	1	1	1	1	1	11.2259	1	4.40862	4.40862
Stpg4	Stpg4	1	1	3.896	12.1004	7.15421	6.68103	1.96533	8.64521	4.39885
Gm25945	Gm25945	1	1	1	3.56163	5.1028	4.40862	1	4.35768	4.35768
5430400D12Rik	5430400D12Rik	1	1	1	8.68489	1	3.27241	1	4.3191	4.3191
Map1s	Map1s	1	2.06833	1	7.83102	3.0514	6.68103	1.35611	5.85448	4.31711
Gm42991	Gm42991	1	1	1	7.83102	4.0771	1	1	4.30271	4.30271
Gm7091	Gm7091	1	1	1	3.56163	7.15421	2.13621	1	4.28401	4.28401
Zfp264	Zfp264	1	1	1	3.56163	7.15421	2.13621	1	4.28401	4.28401
Gpm6b	Gpm6b	1	2.06833	1	8.68489	2.0257	6.68103	1.35611	5.79721	4.27488
Ctf1	Ctf1	1	1	3.896	10.3926	9.20561	5.54482	1.96533	8.38103	4.26443
Morn4	Morn4	2.31416	2.06833	1	12.1004	8.17991	2.13621	1.79417	7.47217	4.16471
Lancl3	Lancl3	1	2.06833	1	6.97714	1	8.95344	1.35611	5.64353	4.16155
Stk36	Stk36	1	1	1	6.12326	3.0514	3.27241	1	4.14903	4.14903
Nfatc2	Nfatc2	1	1	3.896	11.2465	3.0514	10.0896	1.96533	8.12919	4.13629
H2-Eb1	H2-Eb1	15.4558	24.5033	44.44	13.8082	52.2851	279.37	28.133	115.155	4.09321
H2-Ab1	H2-Ab1	10.1991	36.255	52.1627	8.68489	67.6706	327.091	32.8723	134.482	4.09105
F8	F8	6.25665	2.06833	2.93067	17.2237	16.3855	12.3621	3.75188	15.3237	4.08428
Wif1	Wif1	1	1	1	3.56163	4.0771	4.40862	1	4.01578	4.01578
Gm43834	Gm43834	1	1	3.896	6.12326	6.12851	11.2259	1.96533	7.82587	3.98196
Zfp873	Zfp873	4.94249	1	1.96533	7.83102	15.3598	7.81724	2.63594	10.336	3.92119
Pear1	Pear1	1	1	1	1	4.0771	6.68103	1	3.91938	3.91938
Arhgap40	Arhgap40	1	1	1	3.56163	7.15421	1	1	3.90528	3.90528
Gm26856	Gm26856	1	1	1	5.26939	2.0257	4.40862	1	3.90123	3.90123
Gm35315	Gm35315	1	1	2.93067	5.26939	6.12851	7.81724	1.64356	6.40504	3.89706
Gm28557	Gm28557	1	1	1	1	5.1028	5.54482	1	3.88254	3.88254
Lyn	Lyn	1	1	1	5.26939	3.0514	3.27241	1	3.8644	3.8644
AC122426.1	AC122426.1	1	1	1	1.85388	3.0514	6.68103	1	3.8621	3.8621
CT010505.2	CT010505.2	1	2.06833	1	6.97714	2.0257	6.68103	1.35611	5.22796	3.85511
Fam26e	Fam26e	1	1	1	5.26939	4.0771	2.13621	1	3.82757	3.82757
Cnbd2	Cnbd2	2.31416	1	1	3.56163	6.12851	6.68103	1.43805	5.45706	3.79475
Bend4	Bend4	2.31416	1	1	1.85388	1	13.4983	1.43805	5.45071	3.79034
1700047M11Rik	1700047M11Rik	1	1	1	2.70775	3.0514	5.54482	1	3.76799	3.76799
AC144942.1	AC144942.1	2.31416	2.06833	1	9.53877	5.1028	5.54482	1.79417	6.7288	3.75038
Gm38140	Gm38140	1	1	1	6.97714	1	3.27241	1	3.74985	3.74985
Gm7613	Gm7613	1	1	1	3.56163	1	6.68103	1	3.74755	3.74755
Slc5a5	Slc5a5	1	1	1	3.56163	1	6.68103	1	3.74755	3.74755
Gm6433	Gm6433	1	2.06833	2.93067	7.83102	10.2313	4.40862	1.99967	7.49032	3.74578
Slc44a3	Slc44a3	1	4.205	1.96533	6.12326	9.20561	11.2259	2.39011	8.85158	3.70342
Gm9504	Gm9504	1	1	1	2.70775	5.1028	3.27241	1	3.69432	3.69432
Zfp13	Zfp13	2.31416	1	3.896	10.3926	6.12851	10.0896	2.40339	8.87027	3.69073
Mmp25	Mmp25	1	1	1	3.56163	3.0514	4.40862	1	3.67388	3.67388
1190007I07Rik	1190007I07Rik	2.31416	1	1	6.97714	1	7.81724	1.43805	5.26479	3.66105
Dsg1c	Dsg1c	1	4.205	1	6.12326	13.3084	3.27241	2.06833	7.56803	3.659
D430020J02Rik	D430020J02Rik	1	1	1	7.83102	1	2.13621	1	3.65574	3.65574
P4ha3	P4ha3	1	1	1	1	1	8.95344	1	3.65115	3.65115
Gm11532	Gm11532	1	1	1	7.83102	2.0257	1	1	3.61891	3.61891
Gm44275	Gm44275	1	1	1	4.41551	2.0257	4.40862	1	3.61661	3.61661
C78859	C78859	1	1	1	1	2.0257	7.81724	1	3.61431	3.61431
Chadl	Chadl	1	1	3.896	9.53877	6.12851	5.54482	1.96533	7.0707	3.59771
C430014B12Rik	C430014B12Rik	3.62832	2.06833	1	7.83102	7.15421	8.95344	2.23222	7.97956	3.57472
Ptchd3	Ptchd3	1	1	1	3.56163	6.12851	1	1	3.56338	3.56338
Gm25580	Gm25580	1	1	1	1.85388	1	7.81724	1	3.55704	3.55704
Gm37718	Gm37718	1	1	1	1.85388	1	7.81724	1	3.55704	3.55704
Zc3h12d	Zc3h12d	1	1	1	1.85388	1	7.81724	1	3.55704	3.55704
Cntd1	Cntd1	1	2.06833	1	3.56163	3.0514	7.81724	1.35611	4.81009	3.54697
Asb14	Asb14	1	5.27333	1	9.53877	6.12851	10.0896	2.42444	8.58564	3.54128
Dna2	Dna2	2.31416	8.47833	12.584	30.0318	15.3598	37.3586	7.79217	27.5834	3.53989
Fbln2	Fbln2	1	1	1	5.26939	2.0257	3.27241	1	3.5225	3.5225
Olfr544	Olfr544	1	1	1	5.26939	2.0257	3.27241	1	3.5225	3.5225
Dapk3	Dapk3	3.62832	7.41	11.6187	27.4702	19.4626	32.8138	7.55233	26.5822	3.51973
Pcdh20	Pcdh20	1	5.27333	5.82667	29.1779	3.0514	10.0896	4.03333	14.1063	3.49744
Gm35715	Gm35715	1	2.06833	1	2.70775	8.17991	3.27241	1.35611	4.72002	3.48056
Hormad2	Hormad2	1	1	1	2.70775	1	6.68103	1	3.46293	3.46293
Zbtb11os1	Zbtb11os1	1	2.06833	1.96533	6.97714	7.15421	3.27241	1.67789	5.80125	3.45747
Adam30	Adam30	1	3.13667	1	5.26939	9.20561	3.27241	1.71222	5.9158	3.45504
Gm37503	Gm37503	1	1	1	1.85388	4.0771	4.40862	1	3.44653	3.44653
Fam120aos	Fam120aos	1	2.06833	2.93067	2.70775	11.257	6.68103	1.99967	6.88193	3.44154
AC123832.1	AC123832.1	1	1	1	1	7.15421	2.13621	1	3.43014	3.43014
Crnn	Crnn	1	1	1	1.85388	5.1028	3.27241	1	3.4097	3.4097
Gm5189	Gm5189	1	2.06833	1	5.26939	3.0514	5.54482	1.35611	4.62187	3.40818
Gm37618	Gm37618	2.31416	1	1	10.3926	1	3.27241	1.43805	4.88835	3.39928
Tex11	Tex11	1	1	1	6.97714	1	2.13621	1	3.37112	3.37112
Tmem198	Tmem198	1	1	1	6.97714	1	2.13621	1	3.37112	3.37112
Myzap	Myzap	1	2.06833	1	4.41551	7.15421	2.13621	1.35611	4.56864	3.36893
Sgpp2	Sgpp2	1	1	3.896	4.41551	3.0514	12.3621	1.96533	6.60966	3.36312
Gm44423	Gm44423	2.31416	2.06833	2.93067	13.8082	4.0771	6.68103	2.43772	8.18876	3.35919
Pdzd7	Pdzd7	1	2.06833	1	1.85388	5.1028	6.68103	1.35611	4.5459	3.35216
Zfp40	Zfp40	3.62832	3.13667	1.96533	12.1004	8.17991	8.95344	2.91011	9.74458	3.34853
Cnr1	Cnr1	1	1	1.96533	6.12326	6.12851	1	1.32178	4.41726	3.3419
Gm14388	Gm14388	1	1	1.96533	6.12326	6.12851	1	1.32178	4.41726	3.3419
Gm7168	Gm7168	1	1	1	1.85388	7.15421	1	1	3.33603	3.33603
Il1bos	Il1bos	1	1	1	1.85388	7.15421	1	1	3.33603	3.33603
Gm39526	Gm39526	1	1	1	3.56163	2.0257	4.40862	1	3.33198	3.33198
Gm4319	Gm4319	1	1	1	2.70775	5.1028	2.13621	1	3.31559	3.31559
Ccnj	Ccnj	3.62832	1	7.75734	12.9543	13.3084	14.6345	4.12855	13.6324	3.30198
Klk7	Klk7	8.88497	3.13667	5.82667	10.3926	12.2827	36.2224	5.94944	19.6326	3.29991
9230116N13Rik	9230116N13Rik	1	2.06833	1	1.85388	7.15421	4.40862	1.35611	4.47223	3.29784
Gm17669	Gm17669	1	1	1	3.56163	3.0514	3.27241	1	3.29515	3.29515
Gm4275	Gm4275	1	1	1.96533	7.83102	3.0514	2.13621	1.32178	4.33954	3.28311
Gm26862	Gm26862	1	1	1	2.70775	6.12851	1	1	3.27875	3.27875
Ggt1	Ggt1	1	1	1	7.83102	1	1	1	3.27701	3.27701
Crip3	Crip3	1	1	1	4.41551	1	4.40862	1	3.27471	3.27471
Gm15945	Gm15945	1	1	1	4.41551	1	4.40862	1	3.27471	3.27471
Amtn	Amtn	1	1	1	1	1	7.81724	1	3.27241	3.27241
Greb1	Greb1	3.62832	5.27333	5.82667	16.3698	21.514	10.0896	4.90944	15.9912	3.25722
Gm43463	Gm43463	1	2.06833	1	7.83102	1	4.40862	1.35611	4.41321	3.25431
Apol7e	Apol7e	1	1	1	4.41551	2.0257	3.27241	1	3.23787	3.23787
Gm10499	Gm10499	1	1	1	1	2.0257	6.68103	1	3.23558	3.23558
Spry4	Spry4	1	1	1	1	2.0257	6.68103	1	3.23558	3.23558
Pcdhga4	Pcdhga4	1	1	1	3.56163	5.1028	1	1	3.22148	3.22148
Zfp541	Zfp541	1	1	1	3.56163	5.1028	1	1	3.22148	3.22148
Gm36328	Gm36328	1	2.06833	1.96533	4.41551	5.1028	6.68103	1.67789	5.39978	3.2182
Gpr132	Gpr132	2.31416	1	1	3.56163	8.17991	2.13621	1.43805	4.62592	3.21679
Ccdc117	Ccdc117	23.3408	25.5717	31.8907	97.4881	85.1075	77.1258	26.9344	86.5738	3.21425
Sntg2	Sntg2	1	1	1.96533	5.26939	3.0514	4.40862	1.32178	4.24314	3.21017
Zfp974	Zfp974	3.62832	1	5.82667	12.1004	10.2313	11.2259	3.485	11.1859	3.20972
Gm15267	Gm15267	1	2.06833	1	2.70775	8.17991	2.13621	1.35611	4.34129	3.20128
Casq2	Casq2	1	1	1	1	3.0514	5.54482	1	3.19874	3.19874
Kcnb1	Kcnb1	1	1	1	1	3.0514	5.54482	1	3.19874	3.19874
Camkv	Camkv	1	1	1.96533	1	6.12851	5.54482	1.32178	4.22444	3.19603
CT009757.5	CT009757.5	1	2.06833	3.896	8.68489	10.2313	3.27241	2.32144	7.39621	3.18604
Ldlrad2	Ldlrad2	1	1	1	5.26939	1	3.27241	1	3.1806	3.1806
Drc1	Drc1	1	1	1	1.85388	1	6.68103	1	3.1783	3.1783
Gm9132	Gm9132	1	1	1	1.85388	1	6.68103	1	3.1783	3.1783
Gm16234	Gm16234	2.31416	1	1	4.41551	7.15421	2.13621	1.43805	4.56864	3.17696
Zfp783	Zfp783	1	4.205	1	3.56163	7.15421	8.95344	2.06833	6.55643	3.16991
Gm13068	Gm13068	1	1	1	1	4.0771	4.40862	1	3.16191	3.16191
Pcdhga11	Pcdhga11	1	1	1	1	4.0771	4.40862	1	3.16191	3.16191
AC140354.1	AC140354.1	1	2.06833	1	3.56163	7.15421	2.13621	1.35611	4.28401	3.15904
Icosl	Icosl	2.31416	2.06833	1	5.26939	6.12851	5.54482	1.79417	5.64757	3.14774
Gm24198	Gm24198	1	1	1	5.26939	2.0257	2.13621	1	3.14376	3.14376
Gm14056	Gm14056	1	1	1	1.85388	2.0257	5.54482	1	3.14147	3.14147
Klhl35	Klhl35	2.31416	5.27333	4.86134	7.83102	15.3598	15.7707	4.14961	12.9872	3.12973
5930403N24Rik	5930403N24Rik	1	1	1	1	5.1028	3.27241	1	3.12507	3.12507
Cracr2a	Cracr2a	1	1	1	1	5.1028	3.27241	1	3.12507	3.12507
Gm11614	Gm11614	1	1	1	1	5.1028	3.27241	1	3.12507	3.12507
Gm38811	Gm38811	1	1	1	1	5.1028	3.27241	1	3.12507	3.12507
Osbp2	Osbp2	1	1	1	1	5.1028	3.27241	1	3.12507	3.12507
Slc5a8	Slc5a8	1	1	1	1	5.1028	3.27241	1	3.12507	3.12507
Syt9	Syt9	1	1	1	1	5.1028	3.27241	1	3.12507	3.12507
BC100530	BC100530	2.31416	3.13667	3.896	2.70775	6.12851	20.3155	3.11561	9.71725	3.11889
Zswim9	Zswim9	6.25665	7.41	5.82667	15.5159	21.514	23.7241	6.49777	20.2514	3.11666
1700028N14Rik	1700028N14Rik	1	1	1	5.26939	3.0514	1	1	3.10693	3.10693
Gm33882	Gm33882	1	1	1	5.26939	3.0514	1	1	3.10693	3.10693
Gm26628	Gm26628	1	1	1	1.85388	3.0514	4.40862	1	3.10463	3.10463
Lhfpl5	Lhfpl5	1	1	1	1.85388	3.0514	4.40862	1	3.10463	3.10463
Zfp458	Zfp458	1	2.06833	3.896	12.9543	3.0514	5.54482	2.32144	7.1835	3.09441
1500005C15Rik	1500005C15Rik	1	3.13667	1	6.12326	3.0514	6.68103	1.71222	5.28523	3.08677
Mir6395	Mir6395	1	1	1	6.12326	1	2.13621	1	3.08649	3.08649
St8sia2	St8sia2	1	1	1	6.12326	1	2.13621	1	3.08649	3.08649
Dbndd1	Dbndd1	1	2.06833	1	2.70775	2.0257	7.81724	1.35611	4.18356	3.08497
1700016P03Rik	1700016P03Rik	1	1	1	2.70775	1	5.54482	1	3.08419	3.08419
Dgat2l6	Dgat2l6	1	1	1	2.70775	1	5.54482	1	3.08419	3.08419
Gm10686	Gm10686	1	1	1	2.70775	1	5.54482	1	3.08419	3.08419
Serpine3	Serpine3	1	1	1.96533	2.70775	5.1028	4.40862	1.32178	4.07306	3.0815
Sh3tc2	Sh3tc2	1	2.06833	1	5.26939	5.1028	2.13621	1.35611	4.16947	3.07458
Gm28535	Gm28535	2.31416	1	1	7.83102	1	4.40862	1.43805	4.41321	3.06888
AC154377.1	AC154377.1	1	1	1	1.85388	4.0771	3.27241	1	3.0678	3.0678
Emid1	Emid1	1	1	1	1.85388	4.0771	3.27241	1	3.0678	3.0678
Gm15413	Gm15413	1	1	1	1.85388	4.0771	3.27241	1	3.0678	3.0678
Gm23657	Gm23657	1	1	1	1.85388	4.0771	3.27241	1	3.0678	3.0678
Gm7803	Gm7803	1	1	1	1.85388	4.0771	3.27241	1	3.0678	3.0678
Tbx6	Tbx6	1	1	1.96533	3.56163	3.0514	5.54482	1.32178	4.05262	3.06604
Rpl26-ps4	Rpl26-ps4	1	2.06833	1	6.12326	3.0514	3.27241	1.35611	4.14903	3.0595
Dtx4	Dtx4	2.31416	1	1	1.85388	9.20561	2.13621	1.43805	4.39856	3.05869
Krt6b	Krt6b	1	12.7517	7.75734	3.56163	12.2827	49.8569	7.16967	21.9004	3.05459
Gm16072	Gm16072	1	1	1	6.12326	2.0257	1	1	3.04965	3.04965
Slc35f1	Slc35f1	1	1	1	6.12326	2.0257	1	1	3.04965	3.04965
Klhdc7b	Klhdc7b	2.31416	1	1.96533	4.41551	6.12851	5.54482	1.75983	5.36295	3.04742
Pde1b	Pde1b	1	2.06833	3.896	4.41551	11.257	5.54482	2.32144	7.07245	3.04657
Zfp551	Zfp551	2.31416	2.06833	4.86134	20.6392	3.0514	4.40862	3.08128	9.3664	3.03978
Pm20d2	Pm20d2	3.62832	1	13.5493	19.7853	18.4369	16.9069	6.05922	18.3764	3.03279
Gm11973	Gm11973	2.31416	1	1	6.97714	5.1028	1	1.43805	4.35998	3.03186
Gm12201	Gm12201	1	1	1	1.85388	5.1028	2.13621	1	3.03096	3.03096
Pld6	Pld6	1	1	1	1.85388	5.1028	2.13621	1	3.03096	3.03096
Prr9	Prr9	1	3.13667	1	3.56163	3.0514	8.95344	1.71222	5.18883	3.03046
Zfp804b	Zfp804b	1	3.13667	4.86134	5.26939	16.3855	5.54482	2.99933	9.06658	3.02286
Tle2	Tle2	3.62832	1	3.896	5.26939	9.20561	11.2259	2.84144	8.56695	3.015
1700029J07Rik	1700029J07Rik	3.62832	1	1	5.26939	6.12851	5.54482	1.87611	5.64757	3.01026
Gm37850	Gm37850	1	1	1	1.85388	6.12851	1	1	2.99413	2.99413
Prdm16	Prdm16	1	1	1	6.97714	1	1	1	2.99238	2.99238
AC114645.2	AC114645.2	1	1	1	3.56163	1	4.40862	1	2.99008	2.99008
Gm44419	Gm44419	1	1	1	3.56163	1	4.40862	1	2.99008	2.99008
Adamts5	Adamts5	4.94249	1	4.86134	3.56163	6.12851	22.5879	3.60127	10.7594	2.98765
Aox4	Aox4	6.25665	12.7517	16.4453	12.1004	35.8738	57.8103	11.8179	35.2615	2.98374
Gm16876	Gm16876	1	1	1.96533	3.56163	6.12851	2.13621	1.32178	3.94211	2.98243
Grasp	Grasp	1	1	1.96533	5.26939	1	5.54482	1.32178	3.93807	2.97937
AC120375.1	AC120375.1	1	3.13667	5.82667	8.68489	4.0771	16.9069	3.32111	9.88963	2.97781
Bbs10	Bbs10	1	1	2.93067	1.85388	6.12851	6.68103	1.64356	4.8878	2.97392
Gcsam	Gcsam	1	1	1	2.70775	4.0771	2.13621	1	2.97369	2.97369
Gm45188	Gm45188	1	1	1	2.70775	4.0771	2.13621	1	2.97369	2.97369
Gbp3	Gbp3	1	1	1.96533	4.41551	4.0771	3.27241	1.32178	3.92167	2.96697
AC124426.1	AC124426.1	3.62832	3.13667	1.96533	12.9543	5.1028	7.81724	2.91011	8.62477	2.96373
Gm36371	Gm36371	1	1	2.93067	2.70775	4.0771	7.81724	1.64356	4.86736	2.96148
Gm11511	Gm11511	1	1	1	3.56163	2.0257	3.27241	1	2.95325	2.95325
Gm28856	Gm28856	2.31416	2.06833	1.96533	11.2465	3.0514	4.40862	2.11594	6.23552	2.94692
Gm37729	Gm37729	1	2.06833	1	4.41551	2.0257	5.54482	1.35611	3.99534	2.94618
1700112J16Rik	1700112J16Rik	1	2.06833	1	1	2.0257	8.95344	1.35611	3.99305	2.94448
AC154828.2	AC154828.2	2.31416	2.06833	2.93067	5.26939	6.12851	10.0896	2.43772	7.16251	2.9382
Gm12064	Gm12064	1	1	1	2.70775	5.1028	1	1	2.93685	2.93685
Gm38036	Gm38036	7.57081	9.54667	5.82667	22.3469	24.5911	20.3155	7.64805	22.4179	2.93119
CT573086.2	CT573086.2	1	1	2.93067	1.85388	8.17991	4.40862	1.64356	4.81413	2.9291
Gm4473	Gm4473	1	4.205	1.96533	3.56163	6.12851	11.2259	2.39011	6.972	2.91702
Gm5277	Gm5277	1	1	1	3.56163	3.0514	2.13621	1	2.91641	2.91641
Igfbp3	Igfbp3	1044.44	687.938	2231.89	4551.31	2902.71	4090.21	1321.42	3848.08	2.91207
Gm42858	Gm42858	1	2.06833	1	3.56163	6.12851	2.13621	1.35611	3.94211	2.90693
Ctgf	Ctgf	40.4249	9.54667	18.376	98.342	27.6682	72.581	22.7825	66.1971	2.90561
Itgae	Itgae	1	2.06833	1	1.85388	1	8.95344	1.35611	3.93577	2.90225
Serpinb3a	Serpinb3a	3.62832	5.27333	7.75734	12.1004	10.2313	25.9965	5.553	16.1094	2.90103
Gm43421	Gm43421	2.31416	3.13667	1	7.83102	3.0514	7.81724	2.15028	6.23322	2.8988
Zdhhc23	Zdhhc23	3.62832	2.06833	1.96533	10.3926	5.1028	6.68103	2.554	7.39216	2.89435
AC133283.1	AC133283.1	1	1	1	1	1	6.68103	1	2.89368	2.89368
Hgfac	Hgfac	2.31416	3.13667	1.96533	4.41551	9.20561	7.81724	2.47205	7.14612	2.89076
Zfp712	Zfp712	3.62832	1	1	5.26939	2.0257	8.95344	1.87611	5.41618	2.88692
Hmcn1	Hmcn1	2.31416	1	1.96533	3.56163	6.12851	5.54482	1.75983	5.07832	2.88568
B430212C06Rik	B430212C06Rik	4.94249	1	1.96533	11.2465	7.15421	4.40862	2.63594	7.60312	2.8844
Gm44616	Gm44616	2.31416	1	1.96533	5.26939	1	8.95344	1.75983	5.07428	2.88339
1700022N22Rik	1700022N22Rik	1	1	1.96533	6.12326	2.0257	3.27241	1.32178	3.80713	2.88031
Eps8	Eps8	1	1	1.96533	6.12326	2.0257	3.27241	1.32178	3.80713	2.88031
Gm26643	Gm26643	1	1	1.96533	2.70775	2.0257	6.68103	1.32178	3.80483	2.87857
Slc46a2	Slc46a2	2.31416	6.34167	1.96533	24.0547	3.0514	3.27241	3.54039	10.1262	2.86019
Gm5380	Gm5380	1	1	1	4.41551	2.0257	2.13621	1	2.85914	2.85914
Col14a1	Col14a1	1	1	1	1	2.0257	5.54482	1	2.85684	2.85684
Gm35066	Gm35066	1	1	1	1	2.0257	5.54482	1	2.85684	2.85684
Gm16239	Gm16239	1	3.13667	1	1.85388	6.12851	6.68103	1.71222	4.8878	2.85466
Gm6305	Gm6305	1	2.06833	1.96533	4.41551	1	8.95344	1.67789	4.78965	2.85457
Gm12882	Gm12882	1	1	1.96533	6.12326	3.0514	2.13621	1.32178	3.77029	2.85244
Gm43216	Gm43216	2.31416	3.13667	2.93067	1.85388	15.3598	6.68103	2.79383	7.96491	2.85089
2410004P03Rik	2410004P03Rik	3.62832	2.06833	6.792	10.3926	7.15421	18.0431	4.16289	11.8633	2.84978
Gm17794	Gm17794	1	2.06833	1	1.85388	3.0514	6.68103	1.35611	3.8621	2.84793
Zfp605	Zfp605	1	1	1.96533	3.56163	1	6.68103	1.32178	3.74755	2.83524
Frmd5	Frmd5	1	2.06833	1	5.26939	4.0771	2.13621	1.35611	3.82757	2.82246
A130048G24Rik	A130048G24Rik	1	1	1	4.41551	3.0514	1	1	2.8223	2.8223
Gm24031	Gm24031	1	1	1	4.41551	3.0514	1	1	2.8223	2.8223
Gm37886	Gm37886	1	1	1	4.41551	3.0514	1	1	2.8223	2.8223
Fcho1	Fcho1	1	1	1	1	3.0514	4.40862	1	2.82001	2.82001
Masp2	Masp2	3.62832	2.06833	2.93067	11.2465	4.0771	8.95344	2.87578	8.09236	2.81397
Prickle2	Prickle2	3.62832	3.13667	4.86134	18.9314	8.17991	5.54482	3.87544	10.8854	2.80881
Gm45080	Gm45080	1	2.06833	2.93067	1.85388	7.15421	7.81724	1.99967	5.60844	2.80469
Gm42930	Gm42930	2.31416	4.205	2.93067	10.3926	7.15421	8.95344	3.14994	8.83343	2.80431
Zscan20	Zscan20	3.62832	6.34167	8.72267	21.4931	17.4112	13.4983	6.23089	17.4675	2.80337
Elf5	Elf5	1	1	1	5.26939	1	2.13621	1	2.80186	2.80186
Gal3st3	Gal3st3	1	1	1	5.26939	1	2.13621	1	2.80186	2.80186
Gm11201	Gm11201	1	1	1	5.26939	1	2.13621	1	2.80186	2.80186
Gm13094	Gm13094	1	1	1	5.26939	1	2.13621	1	2.80186	2.80186
Gm15856	Gm15856	1	1	1	5.26939	1	2.13621	1	2.80186	2.80186
Klk6	Klk6	1	1	1	5.26939	1	2.13621	1	2.80186	2.80186
Isg20	Isg20	1	4.205	3.896	8.68489	11.257	5.54482	3.03367	8.49558	2.80043
Gm26558	Gm26558	1	1	1	1.85388	1	5.54482	1	2.79957	2.79957
Rnf152	Rnf152	2.31416	1	3.896	2.70775	5.1028	12.3621	2.40339	6.72421	2.7978
Gm45250	Gm45250	3.62832	1	2.93067	3.56163	4.0771	13.4983	2.51966	7.04567	2.79627
Trpc4	Trpc4	2.31416	1	2.93067	7.83102	4.0771	5.54482	2.08161	5.81765	2.79478
Gm43116	Gm43116	1	4.205	1	4.41551	5.1028	7.81724	2.06833	5.77852	2.7938
Gm12289	Gm12289	1	3.13667	1	1.85388	9.20561	3.27241	1.71222	4.7773	2.79012
Gm37985	Gm37985	1	1	1	1	4.0771	3.27241	1	2.78317	2.78317
Gm44931	Gm44931	1	1	1	1	4.0771	3.27241	1	2.78317	2.78317
Gm11702	Gm11702	1	1	1.96533	6.97714	3.0514	1	1.32178	3.67618	2.78124
1190005I06Rik	1190005I06Rik	1	1	1.96533	3.56163	3.0514	4.40862	1.32178	3.67388	2.7795
Gm45534	Gm45534	7.57081	4.205	4.86134	18.9314	19.4626	7.81724	5.54572	15.4038	2.7776
Olfr279	Olfr279	1	1	1	5.26939	2.0257	1	1	2.76503	2.76503
Gm11225	Gm11225	1	1	1	1.85388	2.0257	4.40862	1	2.76273	2.76273
Gm13053	Gm13053	1	1	1	1.85388	2.0257	4.40862	1	2.76273	2.76273
Gm43904	Gm43904	1	1	1	1.85388	2.0257	4.40862	1	2.76273	2.76273
Hs3st1	Hs3st1	1	1	1.96533	1	1	8.95344	1.32178	3.65115	2.7623
Ak3l2-ps	Ak3l2-ps	1	5.27333	2.93067	6.12326	9.20561	10.0896	3.068	8.47284	2.76168
Il1a	Il1a	1	9.54667	1	1.85388	15.3598	14.6345	3.84889	10.6161	2.75821
Slit2	Slit2	1	1	2.93067	6.12326	3.0514	4.40862	1.64356	4.52776	2.75486
Tmprss9	Tmprss9	1	3.13667	1	4.41551	3.0514	6.68103	1.71222	4.71598	2.7543
Abcd1	Abcd1	1	1	3.896	7.83102	5.1028	3.27241	1.96533	5.40208	2.74868
Nlgn1	Nlgn1	1	1	1	1	5.1028	2.13621	1	2.74634	2.74634
Pcdhga8	Pcdhga8	1	1	1	1	5.1028	2.13621	1	2.74634	2.74634
Gm38160	Gm38160	2.31416	2.06833	1	5.26939	5.1028	4.40862	1.79417	4.92694	2.74609
Hoxc13	Hoxc13	3.62832	2.06833	1	1	6.12851	11.2259	2.23222	6.11812	2.74082
H2-Q7	H2-Q7	2.31416	2.06833	4.86134	2.70775	10.2313	12.3621	3.08128	8.43371	2.73708
Gm42995	Gm42995	1	1	1.96533	1	2.0257	7.81724	1.32178	3.61431	2.73443
Cst6	Cst6	104.819	154.84	87.88	427.085	270.759	250.965	115.846	316.27	2.73008
AC152922.1	AC152922.1	1	1	1	1.85388	3.0514	3.27241	1	2.7259	2.7259
Gm37311	Gm37311	1	1	3.896	5.26939	4.0771	6.68103	1.96533	5.34251	2.71837
Has2	Has2	2.31416	8.47833	9.688	5.26939	17.4112	32.8138	6.82683	18.4981	2.70962
B3galt1	B3galt1	1	1	1	1	6.12851	1	1	2.7095	2.7095
Gm10143	Gm10143	1	1	1	1	6.12851	1	1	2.7095	2.7095
Olfr943	Olfr943	1	1	1	1	6.12851	1	1	2.7095	2.7095
Stard8	Stard8	1	1	1	1	6.12851	1	1	2.7095	2.7095
Fbxo2	Fbxo2	1	1	1.96533	4.41551	3.0514	3.27241	1.32178	3.57977	2.7083
Gm45041	Gm45041	1	1	3.896	6.12326	2.0257	7.81724	1.96533	5.32207	2.70797
Gm43429	Gm43429	1	1	1	6.12326	1	1	1	2.70775	2.70775
Kbtbd3	Kbtbd3	2.31416	2.06833	2.93067	1.85388	11.257	6.68103	2.43772	6.59731	2.70634
BC049987	BC049987	1	1	1	2.70775	1	4.40862	1	2.70546	2.70546
Galnt12	Galnt12	1	1	1	2.70775	1	4.40862	1	2.70546	2.70546
Gm4869	Gm4869	1	1	1	2.70775	1	4.40862	1	2.70546	2.70546
Gabrr2	Gabrr2	1	1	2.93067	3.56163	3.0514	6.68103	1.64356	4.43135	2.6962
Bche	Bche	1	1	1	1.85388	4.0771	2.13621	1	2.68906	2.68906
Gm12109	Gm12109	1	1	1	1.85388	4.0771	2.13621	1	2.68906	2.68906
Zfp365	Zfp365	1	3.13667	1	9.53877	1	3.27241	1.71222	4.60373	2.68874
4930480K23Rik	4930480K23Rik	7.57081	7.41	12.584	31.7396	17.4112	24.8603	9.18827	24.6704	2.68498
Rab3il1	Rab3il1	6.25665	4.205	1	6.12326	12.2827	12.3621	3.82055	10.256	2.68443
Gm7986	Gm7986	1	2.06833	1	3.56163	4.0771	3.27241	1.35611	3.63705	2.68197
Gm16201	Gm16201	1	1	1.96533	1	4.0771	5.54482	1.32178	3.54064	2.6787
AA543186	AA543186	1	1	1	2.70775	2.0257	3.27241	1	2.66862	2.66862
AC124577.1	AC124577.1	1	1	1	2.70775	2.0257	3.27241	1	2.66862	2.66862
Fbxl13	Fbxl13	1	1	1	2.70775	2.0257	3.27241	1	2.66862	2.66862
Gm37212	Gm37212	1	1	1	2.70775	2.0257	3.27241	1	2.66862	2.66862
Gm45508	Gm45508	1	1	1	2.70775	2.0257	3.27241	1	2.66862	2.66862
Rsph1	Rsph1	1	1	1	2.70775	2.0257	3.27241	1	2.66862	2.66862
1200007C13Rik	1200007C13Rik	1	2.06833	1	7.83102	2.0257	1	1.35611	3.61891	2.66859
Gm7222	Gm7222	1	2.06833	1.96533	3.56163	2.0257	7.81724	1.67789	4.46819	2.66298
Gm43890	Gm43890	2.31416	2.06833	2.93067	5.26939	4.0771	10.0896	2.43772	6.47871	2.65769
Pip5kl1	Pip5kl1	3.62832	1	1.96533	1.85388	11.257	4.40862	2.19789	5.83984	2.65702
Gm33280	Gm33280	1	2.06833	1	3.56163	5.1028	2.13621	1.35611	3.60021	2.65481
Gm13919	Gm13919	1	1	1	1.85388	5.1028	1	1	2.65223	2.65223
Gm29454	Gm29454	1	1	1	1.85388	5.1028	1	1	2.65223	2.65223
Platr6	Platr6	1	1	1	1.85388	5.1028	1	1	2.65223	2.65223
Tmem173	Tmem173	1	1	1	1.85388	5.1028	1	1	2.65223	2.65223
Rps2-ps4	Rps2-ps4	1	1	2.93067	3.56163	5.1028	4.40862	1.64356	4.35768	2.65138
Akr1c18	Akr1c18	187.611	39.46	47.336	229.839	209.217	288.46	91.469	242.506	2.65123
9330182L06Rik	9330182L06Rik	2.31416	1	1	6.12326	2.0257	3.27241	1.43805	3.80713	2.64741
Hpse	Hpse	2.31416	4.205	2.93067	8.68489	5.1028	11.2259	3.14994	8.33785	2.64698
Fbxo17	Fbxo17	1	3.13667	1	1	8.17991	4.40862	1.71222	4.52951	2.6454
Gm44443	Gm44443	1	2.06833	1.96533	1.85388	8.17991	3.27241	1.67789	4.4354	2.64344
Map3k13	Map3k13	1	2.06833	1.96533	1.85388	8.17991	3.27241	1.67789	4.4354	2.64344
Gm43999	Gm43999	4.94249	2.06833	3.896	7.83102	4.0771	16.9069	3.63561	9.605	2.64192
Mmp23	Mmp23	1	2.06833	1	4.41551	3.0514	3.27241	1.35611	3.57977	2.63974
Krt73	Krt73	2.31416	3.13667	4.86134	10.3926	11.257	5.54482	3.43739	9.06483	2.63713
D930036K23Rik	D930036K23Rik	2.31416	1	1	5.26939	5.1028	1	1.43805	3.79073	2.63601
Gm14399	Gm14399	2.31416	1	1	1.85388	5.1028	4.40862	1.43805	3.78843	2.63442
Il1f8	Il1f8	2.31416	1	1	1.85388	5.1028	4.40862	1.43805	3.78843	2.63442
2900052L18Rik	2900052L18Rik	1	1	1	2.70775	3.0514	2.13621	1	2.63179	2.63179
Gm22089	Gm22089	1	1	1	2.70775	3.0514	2.13621	1	2.63179	2.63179
Gm37536	Gm37536	1	1	1	2.70775	3.0514	2.13621	1	2.63179	2.63179
Gm7927	Gm7927	1	1	1	2.70775	3.0514	2.13621	1	2.63179	2.63179
Gm8616	Gm8616	1	1	1	2.70775	3.0514	2.13621	1	2.63179	2.63179
Igf2bp2	Igf2bp2	14.1416	2.06833	3.896	6.97714	25.6168	20.3155	6.70199	17.6365	2.63153
Gm30934	Gm30934	2.31416	3.13667	1.96533	4.41551	6.12851	8.95344	2.47205	6.49915	2.62905
Aqp11	Aqp11	1	2.06833	3.896	5.26939	4.0771	8.95344	2.32144	6.09998	2.62766
Mios	Mios	8.88497	34.1183	42.5094	61.6253	82.0304	80.5344	28.5042	74.73	2.62172
CT010453.1	CT010453.1	2.31416	1	1	2.70775	3.0514	5.54482	1.43805	3.76799	2.6202
AC123705.1	AC123705.1	1	2.06833	1.96533	3.56163	4.0771	5.54482	1.67789	4.39452	2.61908
Pcdhgb5	Pcdhgb5	1	4.205	1.96533	10.3926	5.1028	3.27241	2.39011	6.25596	2.61743
1700018L02Rik	1700018L02Rik	2.31416	1	1.96533	1	6.12851	6.68103	1.75983	4.60318	2.61569
B230377A18Rik	B230377A18Rik	1	1	1	3.56163	1	3.27241	1	2.61135	2.61135
Gm5590	Gm5590	1	1	1	3.56163	1	3.27241	1	2.61135	2.61135
Kcne4	Kcne4	1	1	1	3.56163	1	3.27241	1	2.61135	2.61135
Tspan32	Tspan32	1	1	1	3.56163	1	3.27241	1	2.61135	2.61135
Acaa1b	Acaa1b	1	2.06833	4.86134	8.68489	3.0514	8.95344	2.64322	6.89658	2.60916
B930036N10Rik	B930036N10Rik	4.94249	2.06833	1	11.2465	4.0771	5.54482	2.67027	6.95615	2.60503
Gbp7	Gbp7	3.62832	8.47833	14.5147	17.2237	31.771	20.3155	8.87378	23.1034	2.60356
Trim36	Trim36	1	1	2.93067	1.85388	2.0257	8.95344	1.64356	4.27767	2.60269
Cdhr1	Cdhr1	2.31416	5.27333	5.82667	13.8082	3.0514	18.0431	4.47139	11.6342	2.60192
B4galt2	B4galt2	2.31416	1	2.93067	1.85388	2.0257	12.3621	2.08161	5.41388	2.60081
Csrp2	Csrp2	6.25665	6.34167	2.93067	8.68489	10.2313	21.4517	5.17633	13.456	2.59952
Oas1e	Oas1e	1	3.13667	2.93067	4.41551	6.12851	7.81724	2.35578	6.12042	2.59804
Gm26722	Gm26722	1	2.06833	1	5.26939	2.0257	3.27241	1.35611	3.5225	2.5975
Zfp72	Zfp72	1	1	1.96533	1	7.15421	2.13621	1.32178	3.43014	2.59509
Gm2670	Gm2670	1	1	1	2.70775	4.0771	1	1	2.59495	2.59495
Gm6133	Gm6133	1	1	1	2.70775	4.0771	1	1	2.59495	2.59495
Irs3	Irs3	1	1	1	2.70775	4.0771	1	1	2.59495	2.59495
Gm37909	Gm37909	1	1	1.96533	2.70775	2.0257	5.54482	1.32178	3.42609	2.59203
G630018N14Rik	G630018N14Rik	1	3.13667	1	3.56163	3.0514	6.68103	1.71222	4.43135	2.58807
Gm43544	Gm43544	2.31416	2.06833	1.96533	4.41551	3.0514	8.95344	2.11594	5.47345	2.58677
Fau-ps2	Fau-ps2	1	2.06833	1	4.41551	5.1028	1	1.35611	3.5061	2.58541
Gm15730	Gm15730	1	1	1	3.56163	2.0257	2.13621	1	2.57451	2.57451
Sema6a	Sema6a	3.62832	1	2.93067	12.1004	4.0771	3.27241	2.51966	6.48331	2.57308
Zfp955a	Zfp955a	2.31416	1	6.792	16.3698	4.0771	5.54482	3.36872	8.66391	2.57187
Endod1	Endod1	25.9691	51.2117	38.648	126.52	79.979	90.7603	38.6096	99.0864	2.56637
Gm45266	Gm45266	2.31416	4.205	3.896	5.26939	10.2313	11.2259	3.47172	8.90885	2.56612
Gm37651	Gm37651	1	1	1.96533	2.70775	3.0514	4.40862	1.32178	3.38926	2.56417
Gm9703	Gm9703	2.31416	2.06833	1	2.70775	1	10.0896	1.79417	4.59913	2.56338
Spire2	Spire2	1	2.06833	1.96533	4.41551	4.0771	4.40862	1.67789	4.30041	2.56299
Rtl10	Rtl10	1	7.41	2.93067	14.662	2.0257	12.3621	3.78022	9.68327	2.56156
Gm11739	Gm11739	2.31416	1	1.96533	3.56163	1	8.95344	1.75983	4.50502	2.55992
CT025561.1	CT025561.1	2.31416	1	1	6.97714	3.0514	1	1.43805	3.67618	2.55636
Gm28286	Gm28286	2.31416	1	1	3.56163	3.0514	4.40862	1.43805	3.67388	2.55476
Gja3	Gja3	1	1	1.96533	1.85388	6.12851	2.13621	1.32178	3.37286	2.55176
Snta1	Snta1	1	2.06833	2.93067	7.83102	3.0514	4.40862	1.99967	5.09701	2.54893
Ntrk1	Ntrk1	3.62832	9.54667	5.82667	5.26939	9.20561	33.95	6.33389	16.1417	2.54846
6720464F23Rik	6720464F23Rik	7.57081	1	4.86134	9.53877	12.2827	12.3621	4.47738	11.3945	2.54491
Jph3	Jph3	3.62832	1	1.96533	9.53877	5.1028	2.13621	2.19789	5.59259	2.54453
Gm45412	Gm45412	3.62832	1	1.96533	6.12326	5.1028	5.54482	2.19789	5.5903	2.54349
Col4a1	Col4a1	1	4.205	10.6533	11.2465	13.3084	15.7707	5.28611	13.4419	2.54287
Arhgap31	Arhgap31	1	1	1	3.56163	3.0514	1	1	2.53768	2.53768
Ascl3	Ascl3	1	1	1	3.56163	3.0514	1	1	2.53768	2.53768
Fbxo27	Fbxo27	1	1	1	3.56163	3.0514	1	1	2.53768	2.53768
Gm10451	Gm10451	1	1	1	3.56163	3.0514	1	1	2.53768	2.53768
Rgsl1	Rgsl1	1	1	1	3.56163	3.0514	1	1	2.53768	2.53768
Syn2	Syn2	1	1	1	3.56163	3.0514	1	1	2.53768	2.53768
4930412M03Rik	4930412M03Rik	1	1	1.96533	2.70775	4.0771	3.27241	1.32178	3.35242	2.5363
Gm13609	Gm13609	2.31416	2.06833	1	5.26939	5.1028	3.27241	1.79417	4.5482	2.535
Zfp280b	Zfp280b	4.94249	2.06833	7.75734	12.1004	6.12851	19.1793	4.92272	12.4694	2.53303
Fam166a	Fam166a	2.31416	1	3.896	4.41551	7.15421	6.68103	2.40339	6.08358	2.53125
Amt	Amt	2.31416	1	1	3.56163	4.0771	3.27241	1.43805	3.63705	2.52915
6330549D23Rik	6330549D23Rik	1	2.06833	1	6.12326	2.0257	2.13621	1.35611	3.42839	2.5281
Gm2093	Gm2093	1	1	4.86134	4.41551	5.1028	7.81724	2.28711	5.77852	2.52656
Slc28a3	Slc28a3	3.62832	3.13667	15.48	2.70775	29.7196	23.7241	7.415	18.7172	2.52423
Gm36638	Gm36638	1	3.13667	1	5.26939	1	6.68103	1.71222	4.31681	2.52117
Gm18942	Gm18942	2.31416	5.27333	5.82667	8.68489	8.17991	16.9069	4.47139	11.2572	2.51761
Atp6v1g2	Atp6v1g2	1	1	1	4.41551	1	2.13621	1	2.51724	2.51724
Gm43792	Gm43792	1	1	1	4.41551	1	2.13621	1	2.51724	2.51724
Tmtc1	Tmtc1	1	1	1	4.41551	1	2.13621	1	2.51724	2.51724
4930579P08Rik	4930579P08Rik	1	1	1	1	1	5.54482	1	2.51494	2.51494
A730081D07Rik	A730081D07Rik	1	1	1	1	1	5.54482	1	2.51494	2.51494
AW047730	AW047730	1	1	1	1	1	5.54482	1	2.51494	2.51494
Bmp8a	Bmp8a	1	1	1	1	1	5.54482	1	2.51494	2.51494
Cd55b	Cd55b	1	1	1	1	1	5.54482	1	2.51494	2.51494
Gm13685	Gm13685	1	1	1	1	1	5.54482	1	2.51494	2.51494
Gm18891	Gm18891	1	1	1	1	1	5.54482	1	2.51494	2.51494
Gm29395	Gm29395	1	1	1	1	1	5.54482	1	2.51494	2.51494
Gm36963	Gm36963	1	1	1	1	1	5.54482	1	2.51494	2.51494
Gm43343	Gm43343	1	1	1	1	1	5.54482	1	2.51494	2.51494
Gm8939	Gm8939	1	1	1	1	1	5.54482	1	2.51494	2.51494
Hydin	Hydin	1	1	1	1	1	5.54482	1	2.51494	2.51494
Lhx8	Lhx8	1	1	1	1	1	5.54482	1	2.51494	2.51494
Mir6352	Mir6352	1	1	1	1	1	5.54482	1	2.51494	2.51494
Olfr496-ps1	Olfr496-ps1	1	1	1	1	1	5.54482	1	2.51494	2.51494
Rpl26-ps6	Rpl26-ps6	1	1	1	1	1	5.54482	1	2.51494	2.51494
Serpina4-ps1	Serpina4-ps1	1	1	1	1	1	5.54482	1	2.51494	2.51494
Sh2d1b1	Sh2d1b1	1	1	1	1	1	5.54482	1	2.51494	2.51494
Ntn4	Ntn4	2.31416	1	1	4.41551	2.0257	4.40862	1.43805	3.61661	2.51493
BC048403	BC048403	3.62832	5.27333	7.75734	8.68489	17.4112	15.7707	5.553	13.9556	2.51316
Gm16148	Gm16148	1	1	3.896	5.26939	5.1028	4.40862	1.96533	4.92694	2.50692
Stc1	Stc1	3.62832	1	1.96533	6.97714	5.1028	4.40862	2.19789	5.49619	2.50067
Daam2	Daam2	1	1	2.93067	2.70775	4.0771	5.54482	1.64356	4.10989	2.50061
Krt79	Krt79	200.753	679.392	363.966	777.174	789.764	1541.7	414.703	1036.21	2.49868
4930522L14Rik	4930522L14Rik	7.57081	5.27333	5.82667	21.4931	9.20561	15.7707	6.22361	15.4898	2.48888
Gm38302	Gm38302	1	1	3.896	5.26939	6.12851	3.27241	1.96533	4.8901	2.48818
AC131586.4	AC131586.4	1	2.06833	1	1.85388	6.12851	2.13621	1.35611	3.37286	2.48716
Dcn	Dcn	28.5974	57.6217	46.3707	168.36	19.4626	141.89	44.1966	109.904	2.48671
Zc3h12b	Zc3h12b	3.62832	2.06833	2.93067	9.53877	4.0771	7.81724	2.87578	7.14437	2.48433
Rom1	Rom1	3.62832	1	1	5.26939	2.0257	6.68103	1.87611	4.65871	2.48318
Mageh1	Mageh1	1	1	1	4.41551	2.0257	1	1	2.4804	2.4804
Cfap70	Cfap70	2.31416	2.06833	3.896	16.3698	2.0257	2.13621	2.7595	6.8439	2.48012
Zfp759	Zfp759	2.31416	3.13667	1	2.70775	12.2827	1	2.15028	5.33016	2.47882
Chrna2	Chrna2	1	1	1	1	2.0257	4.40862	1	2.47811	2.47811
Gm43913	Gm43913	1	1	1	1	2.0257	4.40862	1	2.47811	2.47811
Gm8824	Gm8824	1	1	1	1	2.0257	4.40862	1	2.47811	2.47811
Ifnk	Ifnk	1	1	1	1	2.0257	4.40862	1	2.47811	2.47811
Kif27	Kif27	1	1	1	1	2.0257	4.40862	1	2.47811	2.47811
Rsf1os2	Rsf1os2	1	1	1	1	2.0257	4.40862	1	2.47811	2.47811
Thrsp	Thrsp	1	1	1	1	2.0257	4.40862	1	2.47811	2.47811
Nfe2l3	Nfe2l3	1	3.13667	5.82667	12.1004	8.17991	4.40862	3.32111	8.22964	2.47798
Mmp1a	Mmp1a	2.31416	1	1	3.56163	6.12851	1	1.43805	3.56338	2.47792
Zpbp2	Zpbp2	2.31416	1	1	3.56163	6.12851	1	1.43805	3.56338	2.47792
Cyp1a1	Cyp1a1	2.31416	5.27333	1	8.68489	8.17991	4.40862	2.8625	7.09114	2.47726
Guca1b	Guca1b	1	1	1.96533	1	1	7.81724	1.32178	3.27241	2.47577
Gm15872	Gm15872	1	2.06833	1	2.70775	4.0771	3.27241	1.35611	3.35242	2.47209
Them6	Them6	1	2.06833	1.96533	2.70775	3.0514	6.68103	1.67789	4.14673	2.4714
Heg1	Heg1	11.5133	4.205	10.6533	8.68489	22.5397	33.95	8.79055	21.7249	2.47139
4930444E06Rik	4930444E06Rik	1	2.06833	3.896	6.97714	9.20561	1	2.32144	5.72758	2.46725
Gm9436	Gm9436	1	4.205	1.96533	7.83102	2.0257	7.81724	2.39011	5.89132	2.46487
4732416N19Rik	4732416N19Rik	2.31416	1	1	4.41551	4.0771	2.13621	1.43805	3.54294	2.4637
Tbc1d9	Tbc1d9	2.31416	1	1.96533	1	3.0514	8.95344	1.75983	4.33495	2.46327
Nox1	Nox1	4.94249	1	1	3.56163	10.2313	3.27241	2.31416	5.68845	2.4581
Gm37288	Gm37288	1	2.06833	1	3.56163	2.0257	4.40862	1.35611	3.33198	2.45701
2310081O03Rik	2310081O03Rik	1	1	2.93067	2.70775	6.12851	3.27241	1.64356	4.03622	2.45579
Gm30023	Gm30023	2.31416	1	1.96533	3.56163	6.12851	3.27241	1.75983	4.32085	2.45526
Fam161b	Fam161b	8.88497	8.47833	4.86134	14.662	18.4369	21.4517	7.40821	18.1836	2.45451
Gm37755	Gm37755	1	1	2.93067	4.41551	1	6.68103	1.64356	4.03218	2.45333
Gm18899	Gm18899	2.31416	5.27333	2.93067	9.53877	6.12851	10.0896	3.50605	8.58564	2.4488
Dact1	Dact1	1	1	1.96533	1	2.0257	6.68103	1.32178	3.23558	2.4479
Zfp354a	Zfp354a	1	2.06833	1	2.70775	5.1028	2.13621	1.35611	3.31559	2.44492
Pglyrp1	Pglyrp1	1	4.205	1	1	4.0771	10.0896	2.06833	5.05558	2.44428
0610038B21Rik	0610038B21Rik	2.31416	4.205	2.93067	10.3926	7.15421	5.54482	3.14994	7.69723	2.44361
Kif21b	Kif21b	7.57081	4.205	6.792	14.662	19.4626	11.2259	6.18927	15.1168	2.44243
AC134439.1	AC134439.1	1	1	1	1	3.0514	3.27241	1	2.44127	2.44127
AC135019.1	AC135019.1	1	1	1	1	3.0514	3.27241	1	2.44127	2.44127
Gm23297	Gm23297	1	1	1	1	3.0514	3.27241	1	2.44127	2.44127
Gm9687	Gm9687	1	1	1	1	3.0514	3.27241	1	2.44127	2.44127
Nyx	Nyx	1	1	1	1	3.0514	3.27241	1	2.44127	2.44127
Pard3bos1	Pard3bos1	1	2.06833	1.96533	1.85388	7.15421	3.27241	1.67789	4.0935	2.43967
Irx5	Irx5	3.62832	1	4.86134	7.83102	4.0771	11.2259	3.16322	7.71132	2.43781
Gm42572	Gm42572	2.31416	1	2.93067	5.26939	1	8.95344	2.08161	5.07428	2.43767
Mir3109	Mir3109	6.25665	8.47833	2.93067	17.2237	12.2827	13.4983	5.88855	14.3349	2.43437
Cpeb1	Cpeb1	2.31416	4.205	1.96533	7.83102	6.12851	6.68103	2.82817	6.88018	2.43274
Hsd17b2	Hsd17b2	2.31416	1	1.96533	5.26939	2.0257	5.54482	1.75983	4.27997	2.43203
Stab2	Stab2	1	1	6.792	5.26939	7.15421	8.95344	2.93067	7.12568	2.43142
Lamp1	Lamp1	241.492	228.555	722.104	1064.08	899.514	934.961	397.384	966.184	2.43136
Zfp558	Zfp558	2.31416	1	1	5.26939	3.0514	2.13621	1.43805	3.48566	2.42388
AC187103.1	AC187103.1	1	1	1	5.26939	1	1	1	2.42313	2.42313
Gm44240	Gm44240	1	1	1	5.26939	1	1	1	2.42313	2.42313
Gm6981	Gm6981	1	1	1	5.26939	1	1	1	2.42313	2.42313
Oas3	Oas3	1	1	1	5.26939	1	1	1	2.42313	2.42313
Otogl	Otogl	1	1	1	5.26939	1	1	1	2.42313	2.42313
Pla2g2d	Pla2g2d	1	1	1	5.26939	1	1	1	2.42313	2.42313
Il10	Il10	1	2.06833	3.896	2.70775	4.0771	10.0896	2.32144	5.62484	2.42299
Gm14780	Gm14780	2.31416	1	1.96533	4.41551	5.1028	3.27241	1.75983	4.26358	2.42272
Mmp12	Mmp12	8.88497	15.9567	7.75734	11.2465	55.3622	12.3621	10.8663	26.3236	2.42249
Gm12314	Gm12314	1	1	1	1.85388	1	4.40862	1	2.42083	2.42083
Gm28085	Gm28085	1	1	1	1.85388	1	4.40862	1	2.42083	2.42083
Gm44108	Gm44108	1	1	1	1.85388	1	4.40862	1	2.42083	2.42083
Gm7444	Gm7444	1	1	1	1.85388	1	4.40862	1	2.42083	2.42083
Gm8648	Gm8648	1	1	1	1.85388	1	4.40862	1	2.42083	2.42083
Lhx4	Lhx4	1	1	1	1.85388	1	4.40862	1	2.42083	2.42083
Rhag	Rhag	1	1	1	1.85388	1	4.40862	1	2.42083	2.42083
Tagln	Tagln	1	1	1	1.85388	1	4.40862	1	2.42083	2.42083
Zscan10	Zscan10	1	1	1	1.85388	1	4.40862	1	2.42083	2.42083
Cyp1b1	Cyp1b1	4.94249	1	8.72267	6.97714	8.17991	20.3155	4.88839	11.8242	2.41883
Gm42620	Gm42620	2.31416	3.13667	2.93067	6.97714	2.0257	11.2259	2.79383	6.7429	2.41349
Rnf187	Rnf187	44.3674	37.3233	118.771	188.853	161.009	133.936	66.8205	161.266	2.41342
Gimap6	Gimap6	1	2.06833	1	1	1	7.81724	1.35611	3.27241	2.41309
2310040G07Rik	2310040G07Rik	2.31416	1	1.96533	5.26939	3.0514	4.40862	1.75983	4.24314	2.4111
Snx25	Snx25	4.94249	3.13667	5.82667	6.12326	18.4369	8.95344	4.63527	11.1712	2.41004
Lrriq3	Lrriq3	2.31416	2.06833	1	3.56163	6.12851	3.27241	1.79417	4.32085	2.40828
Nsl1	Nsl1	6.25665	1	4.86134	7.83102	1	20.3155	4.03933	9.71551	2.40523
Arhgap24	Arhgap24	22.0266	9.54667	26.0987	30.8857	42.028	65.7637	19.224	46.2258	2.40459
Gm11513	Gm11513	1	1	1	1	4.0771	2.13621	1	2.40444	2.40444
Gm13433	Gm13433	1	1	1	1	4.0771	2.13621	1	2.40444	2.40444
Gm20427	Gm20427	1	1	1	1	4.0771	2.13621	1	2.40444	2.40444
Gm38560	Gm38560	1	1	1	1	4.0771	2.13621	1	2.40444	2.40444
Gm7692	Gm7692	1	1	1	1	4.0771	2.13621	1	2.40444	2.40444
H2-Q6	H2-Q6	2.31416	1	2.93067	5.26939	3.0514	6.68103	2.08161	5.00061	2.40228
Ank	Ank	36.4824	25.5717	76.296	109.442	131.264	90.7603	46.1167	110.489	2.39585
Gm15910	Gm15910	2.31416	2.06833	1	1	4.0771	7.81724	1.79417	4.29811	2.39561
Lmln	Lmln	3.62832	4.205	1	3.56163	4.0771	13.4983	2.94444	7.04567	2.39287
9430097D07Rik	9430097D07Rik	1	1	1.96533	1	4.0771	4.40862	1.32178	3.16191	2.39216
Gm43726	Gm43726	1	1	1.96533	1	4.0771	4.40862	1.32178	3.16191	2.39216
Sdc3	Sdc3	3.62832	1	3.896	8.68489	6.12851	5.54482	2.84144	6.78607	2.38825
Zfp202	Zfp202	10.1991	7.41	15.48	24.0547	37.9252	16.9069	11.0297	26.2956	2.38407
AC154219.1	AC154219.1	1	1	1	1.85388	2.0257	3.27241	1	2.384	2.384
Cpa2	Cpa2	1	1	1	1.85388	2.0257	3.27241	1	2.384	2.384
Gm13548	Gm13548	1	1	1	1.85388	2.0257	3.27241	1	2.384	2.384
Gm24145	Gm24145	1	1	1	1.85388	2.0257	3.27241	1	2.384	2.384
Gm37310	Gm37310	1	1	1	1.85388	2.0257	3.27241	1	2.384	2.384
Gm44064	Gm44064	1	1	1	1.85388	2.0257	3.27241	1	2.384	2.384
Gm7251	Gm7251	1	1	1	1.85388	2.0257	3.27241	1	2.384	2.384
Ngp	Ngp	1	1	1	1.85388	2.0257	3.27241	1	2.384	2.384
Pla2g10	Pla2g10	1	1	1	1.85388	2.0257	3.27241	1	2.384	2.384
Psmb11	Psmb11	1	1	1	1.85388	2.0257	3.27241	1	2.384	2.384
4930590J08Rik	4930590J08Rik	2.31416	1	1	2.70775	2.0257	5.54482	1.43805	3.42609	2.38245
Zfp111	Zfp111	2.31416	2.06833	4.86134	14.662	4.0771	3.27241	3.08128	7.33718	2.38122
Clec11a	Clec11a	6.25665	1	2.93067	5.26939	12.2827	6.68103	3.39577	8.07771	2.37875
Bbof1	Bbof1	2.31416	5.27333	6.792	16.3698	12.2827	5.54482	4.79317	11.3991	2.3782
Tmem151a	Tmem151a	1	4.205	7.75734	15.5159	4.0771	11.2259	4.32078	10.273	2.37757
AC124577.2	AC124577.2	1	1	1.96533	1.85388	2.0257	5.54482	1.32178	3.14147	2.3767
Gm20796	Gm20796	1	2.06833	1.96533	3.56163	5.1028	3.27241	1.67789	3.97895	2.3714
Gm10364	Gm10364	2.31416	1	1	1.85388	5.1028	3.27241	1.43805	3.4097	2.37105
Pgr	Pgr	2.31416	1	1	1.85388	5.1028	3.27241	1.43805	3.4097	2.37105
Cyp2b23	Cyp2b23	1	1	1	1	5.1028	1	1	2.3676	2.3676
Gm10608	Gm10608	1	1	1	1	5.1028	1	1	2.3676	2.3676
Gm15199	Gm15199	1	1	1	1	5.1028	1	1	2.3676	2.3676
Gm18291	Gm18291	1	1	1	1	5.1028	1	1	2.3676	2.3676
Gm28455	Gm28455	1	1	1	1	5.1028	1	1	2.3676	2.3676
Gm43487	Gm43487	1	1	1	1	5.1028	1	1	2.3676	2.3676
Pcdhga7	Pcdhga7	1	2.06833	4.86134	6.97714	5.1028	6.68103	2.64322	6.25366	2.36592
Hectd3	Hectd3	36.4824	90.74	134.216	205.077	221.526	191.883	87.1462	206.162	2.3657
Gm5445	Gm5445	3.62832	1	1	3.56163	3.0514	6.68103	1.87611	4.43135	2.36199
Dpy19l1	Dpy19l1	12.8275	11.6833	11.6187	34.3012	20.4883	30.5414	12.0432	28.4436	2.36181
Enox1	Enox1	3.62832	1	3.896	6.97714	3.0514	10.0896	2.84144	6.70606	2.36009
Gm8290	Gm8290	1	2.06833	1	1	3.0514	5.54482	1.35611	3.19874	2.35876
Gm13477	Gm13477	1	2.06833	2.93067	4.41551	3.0514	6.68103	1.99967	4.71598	2.35838
Gm4705	Gm4705	4.94249	1	1	5.26939	1	10.0896	2.31416	5.45301	2.35636
Zfp3	Zfp3	3.62832	2.06833	1	6.12326	4.0771	5.54482	2.23222	5.2484	2.3512
3830408C21Rik	3830408C21Rik	2.31416	1	4.86134	8.68489	6.12851	4.40862	2.72517	6.40734	2.35117
Gm21893	Gm21893	1	1	1.96533	1.85388	3.0514	4.40862	1.32178	3.10463	2.34883
Fam229a	Fam229a	1	3.13667	1.96533	1.85388	9.20561	3.27241	2.034	4.7773	2.34872
Foxc1	Foxc1	1	1	1	1.85388	3.0514	2.13621	1	2.34716	2.34716
Galnt2	Galnt2	1	1	1	1.85388	3.0514	2.13621	1	2.34716	2.34716
Gm11826	Gm11826	1	1	1	1.85388	3.0514	2.13621	1	2.34716	2.34716
Gm15700	Gm15700	1	1	1	1.85388	3.0514	2.13621	1	2.34716	2.34716
Gm22595	Gm22595	1	1	1	1.85388	3.0514	2.13621	1	2.34716	2.34716
Gm22935	Gm22935	1	1	1	1.85388	3.0514	2.13621	1	2.34716	2.34716
Gm37131	Gm37131	1	1	1	1.85388	3.0514	2.13621	1	2.34716	2.34716
Gm3830	Gm3830	1	1	1	1.85388	3.0514	2.13621	1	2.34716	2.34716
Gm43332	Gm43332	1	1	1	1.85388	3.0514	2.13621	1	2.34716	2.34716
Txlnb	Txlnb	1	1	1	1.85388	3.0514	2.13621	1	2.34716	2.34716
Gm37035	Gm37035	1	2.06833	4.86134	7.83102	4.0771	6.68103	2.64322	6.19638	2.34425
Itpr1	Itpr1	1	1	2.93067	9.53877	1	1	1.64356	3.84626	2.3402
Gm45731	Gm45731	8.88497	2.06833	2.93067	11.2465	12.2827	8.95344	4.62799	10.8276	2.33958
Matk	Matk	3.62832	4.205	9.688	19.7853	13.3084	7.81724	5.84044	13.637	2.33492
Gm7432	Gm7432	2.31416	4.205	1	4.41551	3.0514	10.0896	2.50639	5.85219	2.33491
Map10	Map10	1	1	3.896	8.68489	4.0771	1	1.96533	4.58733	2.33412
2200002D01Rik	2200002D01Rik	4.94249	3.13667	2.93067	3.56163	4.0771	18.0431	3.66994	8.56061	2.33263
4930423D22Rik	4930423D22Rik	1	1	1	2.70775	1	3.27241	1	2.32672	2.32672
4930579K19Rik	4930579K19Rik	1	1	1	2.70775	1	3.27241	1	2.32672	2.32672
AC159006.3	AC159006.3	1	1	1	2.70775	1	3.27241	1	2.32672	2.32672
Gm11970	Gm11970	1	1	1	2.70775	1	3.27241	1	2.32672	2.32672
Gm24273	Gm24273	1	1	1	2.70775	1	3.27241	1	2.32672	2.32672
Gm30280	Gm30280	1	1	1	2.70775	1	3.27241	1	2.32672	2.32672
Gm34866	Gm34866	1	1	1	2.70775	1	3.27241	1	2.32672	2.32672
Gm5580	Gm5580	1	1	1	2.70775	1	3.27241	1	2.32672	2.32672
Gm6658	Gm6658	1	1	1	2.70775	1	3.27241	1	2.32672	2.32672
Mir6399	Mir6399	1	1	1	2.70775	1	3.27241	1	2.32672	2.32672
Pcdhb5	Pcdhb5	1	1	1	2.70775	1	3.27241	1	2.32672	2.32672
Tarm1	Tarm1	1	1	1	2.70775	1	3.27241	1	2.32672	2.32672
Zfp385b	Zfp385b	1	1	1	2.70775	1	3.27241	1	2.32672	2.32672
Gm24400	Gm24400	2.31416	1	3.896	2.70775	5.1028	8.95344	2.40339	5.588	2.32505
Gm37269	Gm37269	1	3.13667	1	3.56163	5.1028	3.27241	1.71222	3.97895	2.32385
Gm37320	Gm37320	6.25665	8.47833	1.96533	17.2237	9.20561	12.3621	5.56677	12.9304	2.32279
Arhgap30	Arhgap30	4.94249	3.13667	5.82667	10.3926	6.12851	15.7707	4.63527	10.7639	2.32218
Gm43246	Gm43246	1	5.27333	1	6.12326	4.0771	6.68103	2.42444	5.62713	2.321
Acot5	Acot5	2.31416	1	2.93067	2.70775	5.1028	6.68103	2.08161	4.83053	2.32057
1810009A15Rik	1810009A15Rik	1	1	4.86134	5.26939	5.1028	5.54482	2.28711	5.30567	2.31981
Gm28151	Gm28151	2.31416	1	1	6.97714	2.0257	1	1.43805	3.33428	2.31861
Tnc	Tnc	78.5356	78.9883	153.523	195.684	153.829	370.267	103.682	239.927	2.31406
Arntl2	Arntl2	6.25665	5.27333	9.688	15.5159	14.3341	19.1793	7.07266	16.3431	2.31074
Art1	Art1	1	1	1	1.85388	4.0771	1	1	2.31033	2.31033
Cadm2	Cadm2	1	1	1	1.85388	4.0771	1	1	2.31033	2.31033
CT485612.3	CT485612.3	1	1	1	1.85388	4.0771	1	1	2.31033	2.31033
Gm46404	Gm46404	1	1	1	1.85388	4.0771	1	1	2.31033	2.31033
Mir669n	Mir669n	1	1	1	1.85388	4.0771	1	1	2.31033	2.31033
Gm5599	Gm5599	1	2.06833	2.93067	1.85388	3.0514	8.95344	1.99967	4.61957	2.31017
Sdcbp2	Sdcbp2	6.25665	3.13667	3.896	8.68489	5.1028	16.9069	4.42977	10.2315	2.30972
Gm17981	Gm17981	1	1	1.96533	6.12326	2.0257	1	1.32178	3.04965	2.30724
Mex3b	Mex3b	1	1	1.96533	6.12326	2.0257	1	1.32178	3.04965	2.30724
P2rx2	P2rx2	1	1	1.96533	2.70775	2.0257	4.40862	1.32178	3.04736	2.3055
Gm43328	Gm43328	1	3.13667	1.96533	4.41551	4.0771	5.54482	2.034	4.67915	2.30046
Gm14026	Gm14026	4.94249	12.7517	8.72267	22.3469	22.5397	15.7707	8.80561	20.2191	2.29616
Prkce	Prkce	6.25665	8.47833	7.75734	13.8082	16.3855	21.4517	7.49744	17.2151	2.29613
AC132336.1	AC132336.1	7.57081	3.13667	3.896	16.3698	8.17991	8.95344	4.86783	11.1677	2.29419
Gm43145	Gm43145	1	2.06833	1	5.26939	3.0514	1	1.35611	3.10693	2.29106
Hmgb1-ps2	Hmgb1-ps2	2.31416	2.06833	1	2.70775	4.0771	5.54482	1.79417	4.10989	2.2907
Gm6311	Gm6311	1	3.13667	1	4.41551	4.0771	3.27241	1.71222	3.92167	2.2904
Gm4895	Gm4895	2.31416	2.06833	5.82667	4.41551	12.2827	6.68103	3.40306	7.79308	2.29003
B230398E01Rik	B230398E01Rik	1	1	1	2.70775	2.0257	2.13621	1	2.28989	2.28989
Gm13121	Gm13121	1	1	1	2.70775	2.0257	2.13621	1	2.28989	2.28989
Gm15247	Gm15247	1	1	1	2.70775	2.0257	2.13621	1	2.28989	2.28989
Gm43172	Gm43172	1	1	1	2.70775	2.0257	2.13621	1	2.28989	2.28989
Gm44260	Gm44260	1	1	1	2.70775	2.0257	2.13621	1	2.28989	2.28989
Gm9762	Gm9762	1	1	1	2.70775	2.0257	2.13621	1	2.28989	2.28989
Kiss1r	Kiss1r	1	1	1	2.70775	2.0257	2.13621	1	2.28989	2.28989
Pcdhb3	Pcdhb3	1	1	1	2.70775	2.0257	2.13621	1	2.28989	2.28989
Rpl30-ps1	Rpl30-ps1	1	1	1	2.70775	2.0257	2.13621	1	2.28989	2.28989
AC154435.1	AC154435.1	1	2.06833	1	1.85388	3.0514	4.40862	1.35611	3.10463	2.28936
Gm10263	Gm10263	1	2.06833	1	1.85388	3.0514	4.40862	1.35611	3.10463	2.28936
Gm16685	Gm16685	1	2.06833	1	1.85388	3.0514	4.40862	1.35611	3.10463	2.28936
Zfp940	Zfp940	2.31416	1	2.93067	4.41551	2.0257	7.81724	2.08161	4.75282	2.28324
Accs	Accs	8.88497	6.34167	5.82667	18.9314	13.3084	15.7707	7.01777	16.0035	2.28043
Lmo1	Lmo1	40.4249	92.8767	100.429	212.762	147.675	172.567	77.9103	177.668	2.28042
Gm45293	Gm45293	1	1	2.93067	3.56163	1	6.68103	1.64356	3.74755	2.28015
Adcy7	Adcy7	3.62832	3.13667	3.896	6.12326	9.20561	8.95344	3.55366	8.0941	2.27768
Ldlrad1	Ldlrad1	3.62832	2.06833	1.96533	4.41551	4.0771	8.95344	2.554	5.81535	2.27696
Zc2hc1c	Zc2hc1c	2.31416	1	1	1	1	7.81724	1.43805	3.27241	2.27558
Arhgap39	Arhgap39	12.8275	11.6833	9.688	30.0318	29.7196	18.0431	11.3996	25.9315	2.27477
Dhtkd1	Dhtkd1	6.25665	3.13667	1.96533	10.3926	13.3084	2.13621	3.78622	8.61242	2.27468
Dcst1	Dcst1	1	5.27333	7.75734	6.12326	12.2827	13.4983	4.67689	10.6347	2.27389
Gm19972	Gm19972	4.94249	7.41	2.93067	18.9314	10.2313	5.54482	5.09439	11.5692	2.27097
Gm17130	Gm17130	4.94249	2.06833	1	5.26939	5.1028	7.81724	2.67027	6.06314	2.27061
AC125351.1	AC125351.1	4.94249	6.34167	5.82667	12.9543	11.257	14.6345	5.70361	12.9486	2.27025
Zik1	Zik1	1	2.06833	3.896	1.85388	6.12851	7.81724	2.32144	5.26654	2.26865
AC131743.3	AC131743.3	1	2.06833	1.96533	2.70775	2.0257	6.68103	1.67789	3.80483	2.26763
Thsd4	Thsd4	28.5974	18.0933	33.8214	78.7028	68.6963	35.0862	26.8374	60.8284	2.26656
Tiam2	Tiam2	3.62832	5.27333	6.792	11.2465	5.1028	19.1793	5.23122	11.8429	2.26388
Lpcat1	Lpcat1	1	4.205	3.896	10.3926	9.20561	1	3.03367	6.86609	2.2633
Gch1	Gch1	6.25665	4.205	3.896	6.12326	17.4112	8.95344	4.78588	10.8293	2.26276
Ttc39c	Ttc39c	7.57081	3.13667	3.896	1.85388	15.3598	15.7707	4.86783	10.9948	2.25867
Kif17	Kif17	6.25665	3.13667	1.96533	9.53877	7.15421	8.95344	3.78622	8.54881	2.25788
Ranbp6	Ranbp6	12.8275	14.8883	33.8214	59.0636	48.1823	31.6776	20.5124	46.3078	2.25755
4930562D21Rik	4930562D21Rik	1	1	1	2.70775	3.0514	1	1	2.25305	2.25305
9430087J23Rik	9430087J23Rik	1	1	1	2.70775	3.0514	1	1	2.25305	2.25305
AC154361.2	AC154361.2	1	1	1	2.70775	3.0514	1	1	2.25305	2.25305
Ccdc13	Ccdc13	1	1	1	2.70775	3.0514	1	1	2.25305	2.25305
Cntnap5a	Cntnap5a	1	1	1	2.70775	3.0514	1	1	2.25305	2.25305
Gm10766	Gm10766	1	1	1	2.70775	3.0514	1	1	2.25305	2.25305
Gm12067	Gm12067	1	1	1	2.70775	3.0514	1	1	2.25305	2.25305
Gm12097	Gm12097	1	1	1	2.70775	3.0514	1	1	2.25305	2.25305
Gm43136	Gm43136	1	1	1	2.70775	3.0514	1	1	2.25305	2.25305
Gm43633	Gm43633	1	1	1	2.70775	3.0514	1	1	2.25305	2.25305
Gm44954	Gm44954	1	1	1	2.70775	3.0514	1	1	2.25305	2.25305
Gm6787	Gm6787	1	1	1	2.70775	3.0514	1	1	2.25305	2.25305
Htr1d	Htr1d	1	1	1	2.70775	3.0514	1	1	2.25305	2.25305
Mir7009	Mir7009	1	1	1	2.70775	3.0514	1	1	2.25305	2.25305
Prf1	Prf1	1	1	1	2.70775	3.0514	1	1	2.25305	2.25305
Zcwpw2	Zcwpw2	1	1	1	2.70775	3.0514	1	1	2.25305	2.25305
Gm37266	Gm37266	2.31416	1	1	4.41551	2.0257	3.27241	1.43805	3.23787	2.25157
Syne4	Syne4	1	2.06833	1	1	7.15421	1	1.35611	3.0514	2.25011
Gm6939	Gm6939	1	1	1.96533	2.70775	4.0771	2.13621	1.32178	2.97369	2.24976
Mir674	Mir674	1	1	1.96533	2.70775	4.0771	2.13621	1.32178	2.97369	2.24976
Piezo2	Piezo2	1	2.06833	1.96533	1	8.17991	2.13621	1.67789	3.77204	2.24809
Gm45413	Gm45413	3.62832	1	2.93067	2.70775	3.0514	11.2259	2.51966	5.66167	2.24699
Gdpd1	Gdpd1	4.94249	4.205	1	12.9543	2.0257	7.81724	3.3825	7.59907	2.24659
Gm12254	Gm12254	2.31416	2.06833	2.93067	4.41551	3.0514	8.95344	2.43772	5.47345	2.24531
AC154680.1	AC154680.1	2.31416	4.205	4.86134	5.26939	11.257	8.95344	3.7935	8.49328	2.2389
Gm37809	Gm37809	1	4.205	2.93067	3.56163	10.2313	4.40862	2.71189	6.06719	2.23725
Milr1	Milr1	4.94249	5.27333	5.82667	18.0775	2.0257	15.7707	5.3475	11.958	2.23618
Pcdhgb7	Pcdhgb7	1	3.13667	1.96533	5.26939	5.1028	3.27241	2.034	4.5482	2.23609
A430057M04Rik	A430057M04Rik	1	1	2.93067	3.56163	3.0514	4.40862	1.64356	3.67388	2.23533
Fam83e	Fam83e	3.62832	2.06833	2.93067	4.41551	8.17991	6.68103	2.87578	6.42548	2.23435
4930448D08Rik	4930448D08Rik	1	1	1	3.56163	1	2.13621	1	2.23261	2.23261
Gm15334	Gm15334	1	1	1	3.56163	1	2.13621	1	2.23261	2.23261
Gm23482	Gm23482	1	1	1	3.56163	1	2.13621	1	2.23261	2.23261
Sparcl1	Sparcl1	1	1	1	3.56163	1	2.13621	1	2.23261	2.23261
Tex14	Tex14	1	1	1	3.56163	1	2.13621	1	2.23261	2.23261
Nqo2	Nqo2	4.94249	3.13667	2.93067	6.97714	4.0771	13.4983	3.66994	8.18417	2.23006
Gm37342	Gm37342	3.62832	3.13667	7.75734	11.2465	13.3084	7.81724	4.84078	10.7907	2.22913
Nhlrc1	Nhlrc1	1	2.06833	3.896	6.12326	6.12851	3.27241	2.32144	5.17473	2.2291
Rrad	Rrad	6.25665	10.615	11.6187	16.3698	35.8738	11.2259	9.49677	21.1565	2.22776
Gm15533	Gm15533	7.57081	7.41	5.82667	18.0775	10.2313	18.0431	6.93583	15.4506	2.22766
Gm25219	Gm25219	1	1	7.75734	12.1004	4.0771	5.54482	3.25245	7.24078	2.22626
Lrrc31	Lrrc31	4.94249	9.54667	16.4453	25.7624	20.4883	22.5879	10.3115	22.9462	2.2253
E030044B06Rik	E030044B06Rik	3.62832	1	1.96533	5.26939	6.12851	3.27241	2.19789	4.8901	2.22491
AC159193.1	AC159193.1	2.31416	5.27333	1	10.3926	2.0257	6.68103	2.8625	6.36646	2.22409
Dnajc25	Dnajc25	8.88497	4.205	7.75734	11.2465	10.2313	24.8603	6.9491	15.4461	2.22274
Zfp738	Zfp738	4.94249	6.34167	6.792	18.9314	12.2827	8.95344	6.02539	13.3892	2.22213
Olfr1440	Olfr1440	1	2.06833	1	2.70775	3.0514	3.27241	1.35611	3.01052	2.21997
Garnl3	Garnl3	1	2.06833	3.896	3.56163	4.0771	7.81724	2.32144	5.15199	2.2193
Zfp760	Zfp760	8.88497	1	3.896	8.68489	6.12851	15.7707	4.59366	10.1947	2.2193
Tmem260	Tmem260	12.8275	12.7517	13.5493	41.1322	18.4369	27.1327	13.0428	28.9006	2.21583
Trmo	Trmo	4.94249	6.34167	11.6187	12.1004	9.20561	29.4052	7.63428	16.9037	2.21419
Kank4	Kank4	1	2.06833	1.96533	1.85388	7.15421	2.13621	1.67789	3.71476	2.21395
Ldhd	Ldhd	14.1416	11.6833	13.5493	23.2008	27.6682	36.2224	13.1248	29.0305	2.21189
Pald1	Pald1	12.8275	9.54667	7.75734	25.7624	9.20561	31.6776	10.0438	22.2152	2.21183
Tlr5	Tlr5	7.57081	20.23	17.4107	35.1551	39.9766	24.8603	15.0705	33.3307	2.21165
Hsd11b1	Hsd11b1	1	2.06833	1.96533	3.56163	2.0257	5.54482	1.67789	3.71072	2.21154
Gm44567	Gm44567	2.31416	1	4.86134	5.26939	6.12851	6.68103	2.72517	6.02631	2.21135
Gm37967	Gm37967	2.31416	1	2.93067	6.12326	1	6.68103	2.08161	4.60143	2.21052
AC139323.1	AC139323.1	2.31416	1	1	1.85388	1	6.68103	1.43805	3.1783	2.21014
Abca5	Abca5	27.2832	29.845	23.2027	66.7485	58.4393	52.1293	26.777	59.1057	2.20733
Tctex1d4	Tctex1d4	1	1	1.96533	3.56163	3.0514	2.13621	1.32178	2.91641	2.20643
AC122828.2	AC122828.2	1	6.34167	3.896	2.70775	15.3598	6.68103	3.74589	8.24953	2.20229
Gm15675	Gm15675	4.94249	5.27333	17.4107	21.4931	23.5654	15.7707	9.20883	20.2764	2.20184
Gdap10	Gdap10	23.3408	55.485	76.296	109.442	112.801	119.165	51.7073	113.803	2.20091
Gm7390	Gm7390	1	3.13667	1	2.70775	3.0514	5.54482	1.71222	3.76799	2.20065
AC154176.2	AC154176.2	2.31416	1	1	4.41551	4.0771	1	1.43805	3.1642	2.20034
A230060F14Rik	A230060F14Rik	1	3.13667	3.896	4.41551	2.0257	11.2259	2.67756	5.88902	2.1994
CT009550.2	CT009550.2	4.94249	2.06833	1	3.56163	5.1028	8.95344	2.67027	5.87263	2.19926
Syde2	Syde2	6.25665	4.205	5.82667	12.9543	18.4369	4.40862	5.42944	11.9333	2.19788
Gm21738	Gm21738	20.7124	8.47833	8.72267	14.662	25.6168	43.0396	12.6378	27.7728	2.1976
AC154270.2	AC154270.2	1	1	1	3.56163	2.0257	1	1	2.19578	2.19578
AC163664.1	AC163664.1	1	1	1	3.56163	2.0257	1	1	2.19578	2.19578
AC173115.1	AC173115.1	1	1	1	3.56163	2.0257	1	1	2.19578	2.19578
Fam71f2	Fam71f2	1	1	1	3.56163	2.0257	1	1	2.19578	2.19578
Gm14141	Gm14141	1	1	1	3.56163	2.0257	1	1	2.19578	2.19578
Gm26833	Gm26833	1	1	1	3.56163	2.0257	1	1	2.19578	2.19578
Gm29113	Gm29113	1	1	1	3.56163	2.0257	1	1	2.19578	2.19578
Gm5751	Gm5751	1	1	1	3.56163	2.0257	1	1	2.19578	2.19578
Mir6897	Mir6897	1	1	1	3.56163	2.0257	1	1	2.19578	2.19578
Mir7005	Mir7005	1	1	1	3.56163	2.0257	1	1	2.19578	2.19578
Dnaaf5	Dnaaf5	20.7124	19.1617	24.168	63.333	41.0023	36.2224	21.3474	46.8526	2.19477
Gm14263	Gm14263	1	2.06833	1.96533	1.85388	8.17991	1	1.67789	3.67793	2.192
Ism1	Ism1	8.88497	2.06833	3.896	18.9314	9.20561	4.40862	4.94977	10.8485	2.19173
Acss1	Acss1	1	3.13667	4.86134	4.41551	4.0771	11.2259	2.99933	6.57282	2.19143
Zfp608	Zfp608	1	2.06833	1.96533	6.97714	3.0514	1	1.67789	3.67618	2.19096
Pglyrp3	Pglyrp3	2.31416	4.205	6.792	6.12326	6.12851	16.9069	4.43706	9.71955	2.19054
Ttpa	Ttpa	3.62832	21.2983	20.3067	28.3241	27.6682	43.0396	15.0778	33.0106	2.18936
Gm6905	Gm6905	2.31416	1	1.96533	1	6.12851	4.40862	1.75983	3.84571	2.18527
Alms1	Alms1	10.1991	14.8883	4.86134	20.6392	25.6168	19.1793	9.98294	21.8118	2.18491
Gm16407	Gm16407	2.31416	1	1	1.85388	2.0257	5.54482	1.43805	3.14147	2.18453
Lama4	Lama4	6.25665	13.82	15.48	22.3469	23.5654	31.6776	11.8522	25.8633	2.18215
4930405J17Rik	4930405J17Rik	1	6.34167	4.86134	8.68489	11.257	6.68103	4.06767	8.87431	2.18167
Gm28370	Gm28370	1	4.205	2.93067	10.3926	4.0771	3.27241	2.71189	5.91405	2.18079
Tmem178b	Tmem178b	1	2.06833	2.93067	6.97714	5.1028	1	1.99967	4.35998	2.18035
Plekhh2	Plekhh2	19.3983	13.82	10.6533	34.3012	30.7453	30.5414	14.6239	31.8626	2.17881
Iffo1	Iffo1	1	2.06833	1.96533	7.83102	1	2.13621	1.67789	3.65574	2.17877
Cited2	Cited2	8.88497	19.1617	23.2027	34.3012	39.9766	37.3586	17.0831	37.2121	2.1783
Fpr1	Fpr1	1	2.06833	1	3.56163	2.0257	3.27241	1.35611	2.95325	2.17773
Ttc25	Ttc25	1	1	2.93067	1	3.0514	6.68103	1.64356	3.57748	2.17667
Gm15342	Gm15342	4.94249	3.13667	7.75734	11.2465	15.3598	7.81724	5.27883	11.4745	2.17369
Slc22a13b-ps	Slc22a13b-ps	1	5.27333	1	5.26939	6.12851	4.40862	2.42444	5.26884	2.17321
Nos1ap	Nos1ap	11.5133	14.8883	19.3413	33.4473	29.7196	36.2224	15.2477	33.1298	2.17278
Itpka	Itpka	3.62832	1	1	2.70775	5.1028	4.40862	1.87611	4.07306	2.17101
Nkpd1	Nkpd1	2.31416	4.205	5.82667	18.0775	2.0257	6.68103	4.11528	8.92809	2.1695
Gm42702	Gm42702	2.31416	3.13667	1.96533	4.41551	6.12851	5.54482	2.47205	5.36295	2.16943
Gm15835	Gm15835	1	1	2.93067	3.56163	6.12851	1	1.64356	3.56338	2.16809
Lrfn1	Lrfn1	1	1	2.93067	3.56163	6.12851	1	1.64356	3.56338	2.16809
Adamts15	Adamts15	1	2.06833	1	2.70775	5.1028	1	1.35611	2.93685	2.16564
Spata33	Spata33	2.31416	2.06833	1	1	5.1028	5.54482	1.79417	3.88254	2.16398
Hsph1	Hsph1	43.0532	109.97	125.528	176.045	225.629	200.972	92.8504	200.882	2.1635
Cfap100	Cfap100	3.62832	3.13667	1.96533	10.3926	4.0771	4.40862	2.91011	6.29279	2.16239
Gm12276	Gm12276	3.62832	3.13667	1	4.41551	10.2313	2.13621	2.58833	5.59434	2.16137
Gm6919	Gm6919	2.31416	1	1	1.85388	3.0514	4.40862	1.43805	3.10463	2.15891
Ier5l	Ier5l	2.31416	1	1	1.85388	3.0514	4.40862	1.43805	3.10463	2.15891
Syp	Syp	2.31416	1	1	1.85388	3.0514	4.40862	1.43805	3.10463	2.15891
Prkar1b	Prkar1b	1	2.06833	4.86134	1	7.15421	8.95344	2.64322	5.70255	2.15742
Srrm4	Srrm4	4.94249	2.06833	1	8.68489	3.0514	5.54482	2.67027	5.76037	2.15722
Gm45074	Gm45074	3.62832	2.06833	1	3.56163	3.0514	7.81724	2.23222	4.81009	2.15485
Dcp1b	Dcp1b	14.1416	17.025	12.584	22.3469	48.1823	23.7241	14.5835	31.4178	2.15433
Ly75	Ly75	2.31416	2.06833	1	1.85388	3.0514	6.68103	1.79417	3.8621	2.15259
AU040972	AU040972	2.31416	3.13667	3.896	6.97714	3.0514	10.0896	3.11561	6.70606	2.15241
Tgm7	Tgm7	4.94249	8.47833	5.82667	17.2237	16.3855	7.81724	6.41583	13.8088	2.1523
Elk3	Elk3	3.62832	1	1	2.70775	6.12851	3.27241	1.87611	4.03622	2.15138
Gm15186	Gm15186	1	2.06833	1	3.56163	3.0514	2.13621	1.35611	2.91641	2.15057
Lingo3	Lingo3	1	2.06833	1	3.56163	3.0514	2.13621	1.35611	2.91641	2.15057
Spink4	Spink4	1	2.06833	1	3.56163	3.0514	2.13621	1.35611	2.91641	2.15057
Eml1	Eml1	6.25665	5.27333	8.72267	2.70775	20.4883	20.3155	6.75088	14.5039	2.14844
Cyp27b1	Cyp27b1	3.62832	1	1	1	1	10.0896	1.87611	4.02988	2.148
Scube2	Scube2	10.1991	4.205	4.86134	9.53877	19.4626	12.3621	6.42182	13.7878	2.14703
Csrnp2	Csrnp2	8.88497	1	9.688	18.9314	16.3855	6.68103	6.52433	13.9993	2.14571
Gm15653	Gm15653	1	3.13667	1.96533	3.56163	5.1028	4.40862	2.034	4.35768	2.14242
Otud3	Otud3	6.25665	6.34167	4.86134	9.53877	14.3341	13.4983	5.81988	12.4571	2.14043
Tcf7	Tcf7	11.5133	9.54667	11.6187	21.4931	13.3084	35.0862	10.8929	23.2959	2.13863
2210406O10Rik	2210406O10Rik	1	1	1	4.41551	1	1	1	2.1385	2.1385
4930415O20Rik	4930415O20Rik	1	1	1	4.41551	1	1	1	2.1385	2.1385
9130017K11Rik	9130017K11Rik	1	1	1	4.41551	1	1	1	2.1385	2.1385
9930038B18Rik	9930038B18Rik	1	1	1	4.41551	1	1	1	2.1385	2.1385
AC164883.7	AC164883.7	1	1	1	4.41551	1	1	1	2.1385	2.1385
C130075A20Rik	C130075A20Rik	1	1	1	4.41551	1	1	1	2.1385	2.1385
Dnhd1	Dnhd1	1	1	1	4.41551	1	1	1	2.1385	2.1385
Elavl2	Elavl2	1	1	1	4.41551	1	1	1	2.1385	2.1385
Gm10392	Gm10392	1	1	1	4.41551	1	1	1	2.1385	2.1385
Gm11693	Gm11693	1	1	1	4.41551	1	1	1	2.1385	2.1385
Gm21269	Gm21269	1	1	1	4.41551	1	1	1	2.1385	2.1385
Gm22098	Gm22098	1	1	1	4.41551	1	1	1	2.1385	2.1385
Gm27446	Gm27446	1	1	1	4.41551	1	1	1	2.1385	2.1385
Gm37509	Gm37509	1	1	1	4.41551	1	1	1	2.1385	2.1385
Gm38352	Gm38352	1	1	1	4.41551	1	1	1	2.1385	2.1385
Gm43075	Gm43075	1	1	1	4.41551	1	1	1	2.1385	2.1385
Gm45286	Gm45286	1	1	1	4.41551	1	1	1	2.1385	2.1385
Kcns1	Kcns1	1	1	1	4.41551	1	1	1	2.1385	2.1385
Mir7060	Mir7060	1	1	1	4.41551	1	1	1	2.1385	2.1385
Olfr796	Olfr796	1	1	1	4.41551	1	1	1	2.1385	2.1385
Pi15	Pi15	1	1	1	4.41551	1	1	1	2.1385	2.1385
Rho	Rho	1	1	1	4.41551	1	1	1	2.1385	2.1385
Vmn1r87	Vmn1r87	1	1	1	4.41551	1	1	1	2.1385	2.1385
Zfp422-ps	Zfp422-ps	1	1	1	4.41551	1	1	1	2.1385	2.1385
Gm38245	Gm38245	3.62832	4.205	1	10.3926	4.0771	4.40862	2.94444	6.29279	2.13718
Lrrn4cl	Lrrn4cl	6.25665	3.13667	2.93067	11.2465	6.12851	8.95344	4.10799	8.77616	2.13636
4932411K12Rik	4932411K12Rik	1	1	1	1	1	4.40862	1	2.13621	2.13621
5033423K11Rik	5033423K11Rik	1	1	1	1	1	4.40862	1	2.13621	2.13621
6430573P05Rik	6430573P05Rik	1	1	1	1	1	4.40862	1	2.13621	2.13621
9430024E24Rik	9430024E24Rik	1	1	1	1	1	4.40862	1	2.13621	2.13621
AC114575.1	AC114575.1	1	1	1	1	1	4.40862	1	2.13621	2.13621
AC140393.1	AC140393.1	1	1	1	1	1	4.40862	1	2.13621	2.13621
AC153561.1	AC153561.1	1	1	1	1	1	4.40862	1	2.13621	2.13621
Asxl3	Asxl3	1	1	1	1	1	4.40862	1	2.13621	2.13621
Cdh10	Cdh10	1	1	1	1	1	4.40862	1	2.13621	2.13621
Chrna4	Chrna4	1	1	1	1	1	4.40862	1	2.13621	2.13621
Cldn3	Cldn3	1	1	1	1	1	4.40862	1	2.13621	2.13621
Csf3r	Csf3r	1	1	1	1	1	4.40862	1	2.13621	2.13621
CT010478.1	CT010478.1	1	1	1	1	1	4.40862	1	2.13621	2.13621
D030034A15Rik	D030034A15Rik	1	1	1	1	1	4.40862	1	2.13621	2.13621
D830032E09Rik	D830032E09Rik	1	1	1	1	1	4.40862	1	2.13621	2.13621
Dnah11	Dnah11	1	1	1	1	1	4.40862	1	2.13621	2.13621
Dppa1	Dppa1	1	1	1	1	1	4.40862	1	2.13621	2.13621
Fam131b	Fam131b	1	1	1	1	1	4.40862	1	2.13621	2.13621
Gjb1	Gjb1	1	1	1	1	1	4.40862	1	2.13621	2.13621
Gm11788	Gm11788	1	1	1	1	1	4.40862	1	2.13621	2.13621
Gm12397	Gm12397	1	1	1	1	1	4.40862	1	2.13621	2.13621
Gm12551	Gm12551	1	1	1	1	1	4.40862	1	2.13621	2.13621
Gm12694	Gm12694	1	1	1	1	1	4.40862	1	2.13621	2.13621
Gm12979	Gm12979	1	1	1	1	1	4.40862	1	2.13621	2.13621
Gm14252	Gm14252	1	1	1	1	1	4.40862	1	2.13621	2.13621
Gm14497	Gm14497	1	1	1	1	1	4.40862	1	2.13621	2.13621
Gm14608	Gm14608	1	1	1	1	1	4.40862	1	2.13621	2.13621
Gm18429	Gm18429	1	1	1	1	1	4.40862	1	2.13621	2.13621
Gm18592	Gm18592	1	1	1	1	1	4.40862	1	2.13621	2.13621
Gm2099	Gm2099	1	1	1	1	1	4.40862	1	2.13621	2.13621
Gm21362	Gm21362	1	1	1	1	1	4.40862	1	2.13621	2.13621
Gm22248	Gm22248	1	1	1	1	1	4.40862	1	2.13621	2.13621
Gm29811	Gm29811	1	1	1	1	1	4.40862	1	2.13621	2.13621
Gm31520	Gm31520	1	1	1	1	1	4.40862	1	2.13621	2.13621
Gm37356	Gm37356	1	1	1	1	1	4.40862	1	2.13621	2.13621
Gm38187	Gm38187	1	1	1	1	1	4.40862	1	2.13621	2.13621
Gm42678	Gm42678	1	1	1	1	1	4.40862	1	2.13621	2.13621
Gm43288	Gm43288	1	1	1	1	1	4.40862	1	2.13621	2.13621
Gm43852	Gm43852	1	1	1	1	1	4.40862	1	2.13621	2.13621
Gm44279	Gm44279	1	1	1	1	1	4.40862	1	2.13621	2.13621
Gm5416	Gm5416	1	1	1	1	1	4.40862	1	2.13621	2.13621
Gm7150	Gm7150	1	1	1	1	1	4.40862	1	2.13621	2.13621
Gm7412	Gm7412	1	1	1	1	1	4.40862	1	2.13621	2.13621
Gm9658	Gm9658	1	1	1	1	1	4.40862	1	2.13621	2.13621
Gpr75	Gpr75	1	1	1	1	1	4.40862	1	2.13621	2.13621
Htr2a	Htr2a	1	1	1	1	1	4.40862	1	2.13621	2.13621
Il21r	Il21r	1	1	1	1	1	4.40862	1	2.13621	2.13621
Olfr414	Olfr414	1	1	1	1	1	4.40862	1	2.13621	2.13621
Prl7c1	Prl7c1	1	1	1	1	1	4.40862	1	2.13621	2.13621
Rdh18-ps	Rdh18-ps	1	1	1	1	1	4.40862	1	2.13621	2.13621
Rpl31-ps20	Rpl31-ps20	1	1	1	1	1	4.40862	1	2.13621	2.13621
Rpl9-ps3	Rpl9-ps3	1	1	1	1	1	4.40862	1	2.13621	2.13621
Synpr	Synpr	1	1	1	1	1	4.40862	1	2.13621	2.13621
Tmem200b	Tmem200b	1	1	1	1	1	4.40862	1	2.13621	2.13621
Tmprss11b	Tmprss11b	1	1	1	1	1	4.40862	1	2.13621	2.13621
Wfdc12	Wfdc12	1	1	1	1	1	4.40862	1	2.13621	2.13621
Rpl23a-ps1	Rpl23a-ps1	1	1	1.96533	4.41551	3.0514	1	1.32178	2.8223	2.13523
Gm19337	Gm19337	7.57081	5.27333	3.896	6.97714	16.3855	12.3621	5.58005	11.9082	2.13407
Gpr155	Gpr155	15.4558	18.0933	32.856	39.4245	61.5164	40.7672	22.135	47.236	2.13399
Gm20692	Gm20692	1	2.06833	1	1	1	6.68103	1.35611	2.89368	2.1338
H2-Q2	H2-Q2	1	2.06833	1	1	1	6.68103	1.35611	2.89368	2.1338
Vcan	Vcan	1	2.06833	1	1	1	6.68103	1.35611	2.89368	2.1338
Gm22748	Gm22748	1	3.13667	1.96533	7.83102	3.0514	2.13621	2.034	4.33954	2.1335
Zfp11	Zfp11	1	1	1.96533	1	3.0514	4.40862	1.32178	2.82001	2.1335
Ace	Ace	2.31416	1	1	1.85388	4.0771	3.27241	1.43805	3.0678	2.1333
Gm5472	Gm5472	2.31416	1	1	1.85388	4.0771	3.27241	1.43805	3.0678	2.1333
Gm6630	Gm6630	2.31416	1	1	1.85388	4.0771	3.27241	1.43805	3.0678	2.1333
Slc3a1	Slc3a1	3.62832	2.06833	3.896	5.26939	5.1028	10.0896	3.19755	6.82061	2.13307
Ccdc66	Ccdc66	4.94249	12.7517	5.82667	12.1004	14.3341	23.7241	7.84027	16.7195	2.13252
Fam180a	Fam180a	2.31416	3.13667	1	5.26939	4.0771	4.40862	2.15028	4.58504	2.1323
Oas1c	Oas1c	11.5133	4.205	8.72267	21.4931	20.4883	10.0896	8.14699	17.357	2.13048
Krt42	Krt42	14.1416	1	5.82667	4.41551	5.1028	35.0862	6.98943	14.8682	2.12724
Adgre5	Adgre5	2.31416	10.615	9.688	21.4931	15.3598	11.2259	7.53906	16.0262	2.12576
Plekhf2	Plekhf2	39.1107	78.9883	113.944	207.638	174.344	111.212	77.3477	164.398	2.12544
Arsg	Arsg	1	14.8883	6.792	21.4931	14.3341	12.3621	7.56011	16.0631	2.12471
4931409K22Rik	4931409K22Rik	1	2.06833	1	3.56163	4.0771	1	1.35611	2.87958	2.12341
Gm29480	Gm29480	1	2.06833	1	3.56163	4.0771	1	1.35611	2.87958	2.12341
Liph	Liph	3.62832	10.615	12.584	28.3241	17.4112	11.2259	8.94244	18.987	2.12325
Rtel1	Rtel1	18.0841	13.82	17.4107	41.1322	20.4883	43.0396	16.4383	34.8867	2.12229
Agbl2	Agbl2	2.31416	1	3.896	7.83102	3.0514	4.40862	2.40339	5.09701	2.12076
Casq1	Casq1	1	2.06833	1.96533	1.85388	1	7.81724	1.67789	3.55704	2.11995
Ccdc33	Ccdc33	1	1	1.96533	5.26939	1	2.13621	1.32178	2.80186	2.11977
Shf	Shf	2.31416	1	1	2.70775	2.0257	4.40862	1.43805	3.04736	2.11908
Slc6a20b	Slc6a20b	1	1	1.96533	1.85388	1	5.54482	1.32178	2.79957	2.11803
Gm44013	Gm44013	10.1991	10.615	3.896	10.3926	20.4883	21.4517	8.23671	17.4442	2.11786
AC132863.1	AC132863.1	15.4558	10.615	18.376	22.3469	29.7196	41.9034	14.8156	31.3233	2.11421
Amhr2	Amhr2	2.31416	2.06833	2.93067	3.56163	4.0771	7.81724	2.43772	5.15199	2.11345
AC159308.2	AC159308.2	2.31416	2.06833	1	5.26939	5.1028	1	1.79417	3.79073	2.11281
Gm44624	Gm44624	1	3.13667	1	4.41551	2.0257	4.40862	1.71222	3.61661	2.11223
Rbpms	Rbpms	1	3.13667	1	4.41551	2.0257	4.40862	1.71222	3.61661	2.11223
Slc25a2	Slc25a2	2.31416	2.06833	1	1.85388	5.1028	4.40862	1.79417	3.78843	2.11153
Itga7	Itga7	1	7.41	2.93067	4.41551	7.15421	12.3621	3.78022	7.97726	2.11026
Vegfa	Vegfa	1	1	7.75734	12.1004	4.0771	4.40862	3.25245	6.86204	2.10981
Gm43690	Gm43690	1	2.06833	1	4.41551	2.0257	2.13621	1.35611	2.85914	2.10834
Gm1123	Gm1123	1	2.06833	1	1	2.0257	5.54482	1.35611	2.85684	2.10664
Kcnma1	Kcnma1	1	2.06833	1	1	2.0257	5.54482	1.35611	2.85684	2.10664
Gm44891	Gm44891	3.62832	8.47833	8.72267	16.3698	17.4112	10.0896	6.94311	14.6236	2.1062
C230062I16Rik	C230062I16Rik	1	1	1.96533	1	4.0771	3.27241	1.32178	2.78317	2.10563
Dpysl5	Dpysl5	1	1	1.96533	1	4.0771	3.27241	1.32178	2.78317	2.10563
8430408G22Rik	8430408G22Rik	6.25665	4.205	1	5.26939	13.3084	5.54482	3.82055	8.04087	2.10464
Atf1-ps	Atf1-ps	2.31416	2.06833	1.96533	2.70775	5.1028	5.54482	2.11594	4.45179	2.10393
Cox15	Cox15	4.94249	5.27333	7.75734	14.662	5.1028	18.0431	5.99105	12.6026	2.10358
Tmem158	Tmem158	7.57081	3.13667	6.792	12.9543	9.20561	14.6345	5.83316	12.2648	2.1026
Xylt2	Xylt2	4.94249	6.34167	12.584	27.4702	9.20561	13.4983	7.95605	16.7247	2.10213
Gm34921	Gm34921	1	4.205	1.96533	4.41551	5.1028	5.54482	2.39011	5.02105	2.10076
Zfp870	Zfp870	1	1	3.896	3.56163	1	7.81724	1.96533	4.12629	2.09954
4930525G20Rik	4930525G20Rik	1	1	1	1	2.0257	3.27241	1	2.09937	2.09937
AC121567.1	AC121567.1	1	1	1	1	2.0257	3.27241	1	2.09937	2.09937
AC154643.1	AC154643.1	1	1	1	1	2.0257	3.27241	1	2.09937	2.09937
AC156273.1	AC156273.1	1	1	1	1	2.0257	3.27241	1	2.09937	2.09937
Ano4	Ano4	1	1	1	1	2.0257	3.27241	1	2.09937	2.09937
B230322F03Rik	B230322F03Rik	1	1	1	1	2.0257	3.27241	1	2.09937	2.09937
Cadm3	Cadm3	1	1	1	1	2.0257	3.27241	1	2.09937	2.09937
Gm11725	Gm11725	1	1	1	1	2.0257	3.27241	1	2.09937	2.09937
Gm11971	Gm11971	1	1	1	1	2.0257	3.27241	1	2.09937	2.09937
Gm12587	Gm12587	1	1	1	1	2.0257	3.27241	1	2.09937	2.09937
Gm17571	Gm17571	1	1	1	1	2.0257	3.27241	1	2.09937	2.09937
Gm18859	Gm18859	1	1	1	1	2.0257	3.27241	1	2.09937	2.09937
Gm20939	Gm20939	1	1	1	1	2.0257	3.27241	1	2.09937	2.09937
Gm22672	Gm22672	1	1	1	1	2.0257	3.27241	1	2.09937	2.09937
Gm26287	Gm26287	1	1	1	1	2.0257	3.27241	1	2.09937	2.09937
Gm26895	Gm26895	1	1	1	1	2.0257	3.27241	1	2.09937	2.09937
Gm28374	Gm28374	1	1	1	1	2.0257	3.27241	1	2.09937	2.09937
Gm39318	Gm39318	1	1	1	1	2.0257	3.27241	1	2.09937	2.09937
Gm44021	Gm44021	1	1	1	1	2.0257	3.27241	1	2.09937	2.09937
Hnf1b	Hnf1b	1	1	1	1	2.0257	3.27241	1	2.09937	2.09937
Ihh	Ihh	1	1	1	1	2.0257	3.27241	1	2.09937	2.09937
Mir7013	Mir7013	1	1	1	1	2.0257	3.27241	1	2.09937	2.09937
Ncan	Ncan	1	1	1	1	2.0257	3.27241	1	2.09937	2.09937
Nudt15	Nudt15	1	1	1	1	2.0257	3.27241	1	2.09937	2.09937
Tcp10b	Tcp10b	1	1	1	1	2.0257	3.27241	1	2.09937	2.09937
Vmn1r184	Vmn1r184	1	1	1	1	2.0257	3.27241	1	2.09937	2.09937
Zcchc9-ps	Zcchc9-ps	1	1	1	1	2.0257	3.27241	1	2.09937	2.09937
Zmynd12	Zmynd12	1	1	1	1	2.0257	3.27241	1	2.09937	2.09937
Gm6493	Gm6493	1	2.06833	1.96533	1.85388	2.0257	6.68103	1.67789	3.5202	2.09799
Rpl7a-ps3	Rpl7a-ps3	1	2.06833	3.896	2.70775	4.0771	7.81724	2.32144	4.86736	2.0967
Gm11249	Gm11249	3.62832	3.13667	9.688	12.1004	12.2827	10.0896	5.48433	11.4909	2.09523
Slc25a47	Slc25a47	2.31416	2.06833	3.896	7.83102	5.1028	4.40862	2.7595	5.78081	2.09488
AC160410.1	AC160410.1	3.62832	3.13667	2.93067	4.41551	9.20561	6.68103	3.23189	6.76738	2.09394
Cct8l1	Cct8l1	2.31416	1	1	2.70775	3.0514	3.27241	1.43805	3.01052	2.09347
Fam169a	Fam169a	2.31416	1	1	2.70775	3.0514	3.27241	1.43805	3.01052	2.09347
AC124579.1	AC124579.1	1	1	1.96533	5.26939	2.0257	1	1.32178	2.76503	2.0919
Pramef12	Pramef12	1	1	1.96533	5.26939	2.0257	1	1.32178	2.76503	2.0919
Zfp182	Zfp182	7.57081	13.82	9.688	19.7853	11.257	33.95	10.3596	21.6641	2.09121
A830010M20Rik	A830010M20Rik	1	2.06833	3.896	5.26939	7.15421	2.13621	2.32144	4.85327	2.09062
Tmem190	Tmem190	1	1	1.96533	1.85388	2.0257	4.40862	1.32178	2.76273	2.09016
Sspn	Sspn	2.31416	3.13667	5.82667	3.56163	13.3084	6.68103	3.75917	7.85036	2.08832
Ptp4a1	Ptp4a1	57.509	93.945	124.563	178.606	223.577	173.703	92.0056	191.962	2.08642
1700052K11Rik	1700052K11Rik	3.62832	3.13667	3.896	9.53877	7.15421	5.54482	3.55366	7.4126	2.0859
Cnnm2	Cnnm2	1	3.13667	15.48	18.9314	6.12851	15.7707	6.53889	13.6102	2.08142
Gm14022	Gm14022	1	2.06833	1	4.41551	3.0514	1	1.35611	2.8223	2.08117
AI854703	AI854703	2.31416	1	1	3.56163	1	4.40862	1.43805	2.99008	2.07926
Cnmd	Cnmd	2.31416	1	1	3.56163	1	4.40862	1.43805	2.99008	2.07926
Camkk2	Camkk2	6.25665	9.54667	21.272	21.4931	20.4883	35.0862	12.3584	25.6892	2.07867
Pnma5	Pnma5	4.94249	2.06833	1.96533	10.3926	6.12851	2.13621	2.99205	6.21912	2.07855
Plxnd1	Plxnd1	3.62832	1	2.93067	5.26939	7.15421	3.27241	2.51966	5.232	2.07647
Rprd1a	Rprd1a	15.4558	22.3667	28.0293	53.0865	34.8481	48.7207	21.9506	45.5518	2.07519
Lhfpl2	Lhfpl2	2.31416	3.13667	1.96533	1	2.0257	12.3621	2.47205	5.12925	2.0749
Mir744	Mir744	3.62832	1	2.93067	3.56163	2.0257	10.0896	2.51966	5.22566	2.07395
Olfr543	Olfr543	2.31416	1	2.93067	5.26939	1	6.68103	2.08161	4.31681	2.07378
Gm43807	Gm43807	3.62832	5.27333	1.96533	8.68489	7.15421	6.68103	3.62233	7.50671	2.07234
Gm43422	Gm43422	1	7.41	6.792	5.26939	8.17991	18.0431	5.06733	10.4975	2.07159
9430064I24Rik	9430064I24Rik	2.31416	2.06833	1	3.56163	2.0257	5.54482	1.79417	3.71072	2.06821
Gm12838	Gm12838	2.31416	1	1	2.70775	4.0771	2.13621	1.43805	2.97369	2.06786
Crct1	Crct1	1	2.06833	1	5.26939	1	2.13621	1.35611	2.80186	2.0661
Hs6st2	Hs6st2	1	2.06833	1	5.26939	1	2.13621	1.35611	2.80186	2.0661
Frem3	Frem3	1	2.06833	2.93067	1.85388	6.12851	4.40862	1.99967	4.13033	2.06551
Lin7b	Lin7b	1	2.06833	1.96533	2.70775	1	6.68103	1.67789	3.46293	2.06386
1110003F10Rik	1110003F10Rik	1	1	1	1	3.0514	2.13621	1	2.06254	2.06254
2900052N01Rik	2900052N01Rik	1	1	1	1	3.0514	2.13621	1	2.06254	2.06254
4930447N08Rik	4930447N08Rik	1	1	1	1	3.0514	2.13621	1	2.06254	2.06254
Abcb11	Abcb11	1	1	1	1	3.0514	2.13621	1	2.06254	2.06254
Abcc9	Abcc9	1	1	1	1	3.0514	2.13621	1	2.06254	2.06254
Adgrf5	Adgrf5	1	1	1	1	3.0514	2.13621	1	2.06254	2.06254
BC055308	BC055308	1	1	1	1	3.0514	2.13621	1	2.06254	2.06254
Cited1	Cited1	1	1	1	1	3.0514	2.13621	1	2.06254	2.06254
Cntnap5b	Cntnap5b	1	1	1	1	3.0514	2.13621	1	2.06254	2.06254
CT010453.2	CT010453.2	1	1	1	1	3.0514	2.13621	1	2.06254	2.06254
Gm11827	Gm11827	1	1	1	1	3.0514	2.13621	1	2.06254	2.06254
Gm12784	Gm12784	1	1	1	1	3.0514	2.13621	1	2.06254	2.06254
Gm13561	Gm13561	1	1	1	1	3.0514	2.13621	1	2.06254	2.06254
Gm13667	Gm13667	1	1	1	1	3.0514	2.13621	1	2.06254	2.06254
Gm16343	Gm16343	1	1	1	1	3.0514	2.13621	1	2.06254	2.06254
Gm17147	Gm17147	1	1	1	1	3.0514	2.13621	1	2.06254	2.06254
Gm18988	Gm18988	1	1	1	1	3.0514	2.13621	1	2.06254	2.06254
Gm19680	Gm19680	1	1	1	1	3.0514	2.13621	1	2.06254	2.06254
Gm21182	Gm21182	1	1	1	1	3.0514	2.13621	1	2.06254	2.06254
Gm23199	Gm23199	1	1	1	1	3.0514	2.13621	1	2.06254	2.06254
Gm2546	Gm2546	1	1	1	1	3.0514	2.13621	1	2.06254	2.06254
Gm29383	Gm29383	1	1	1	1	3.0514	2.13621	1	2.06254	2.06254
Gm8838	Gm8838	1	1	1	1	3.0514	2.13621	1	2.06254	2.06254
Lrrc69	Lrrc69	1	1	1	1	3.0514	2.13621	1	2.06254	2.06254
Nr2f1	Nr2f1	1	1	1	1	3.0514	2.13621	1	2.06254	2.06254
Prkcg	Prkcg	1	1	1	1	3.0514	2.13621	1	2.06254	2.06254
Rec8	Rec8	1	1	1	1	3.0514	2.13621	1	2.06254	2.06254
Rpl17-ps9	Rpl17-ps9	1	1	1	1	3.0514	2.13621	1	2.06254	2.06254
Shroom1	Shroom1	1	1	1	1	3.0514	2.13621	1	2.06254	2.06254
Snhg7os	Snhg7os	1	1	1	1	3.0514	2.13621	1	2.06254	2.06254
Spata25	Spata25	1	1	1	1	3.0514	2.13621	1	2.06254	2.06254
Ankrd55	Ankrd55	1	1	1.96533	1.85388	3.0514	3.27241	1.32178	2.7259	2.0623
Gm6139	Gm6139	1	1	3.896	3.56163	3.0514	5.54482	1.96533	4.05262	2.06205
Gm13205	Gm13205	2.31416	3.13667	4.86134	10.3926	3.0514	7.81724	3.43739	7.0871	2.06177
Pip4k2a	Pip4k2a	8.88497	11.6833	14.5147	23.2008	27.6682	21.4517	11.6943	24.1069	2.06142
Tmem82	Tmem82	2.31416	2.06833	1	2.70775	5.1028	3.27241	1.79417	3.69432	2.05908
Gm43658	Gm43658	1	9.54667	2.93067	10.3926	6.12851	11.2259	4.49245	9.249	2.05879
Ccdc3	Ccdc3	16.7699	19.1617	32.856	59.0636	33.8224	48.7207	22.9292	47.2022	2.05861
Slc2a4rg-ps	Slc2a4rg-ps	7.57081	3.13667	4.86134	9.53877	11.257	11.2259	5.1896	10.6739	2.05678
Gm17108	Gm17108	3.62832	2.06833	3.896	7.83102	4.0771	7.81724	3.19755	6.57512	2.0563
Srgap3	Srgap3	8.88497	6.34167	9.688	15.5159	25.6168	10.0896	8.30488	17.0741	2.05591
BC065397	BC065397	2.31416	3.13667	1.96533	6.97714	6.12851	2.13621	2.47205	5.08062	2.05522
Ing4	Ing4	6.25665	3.13667	8.72267	10.3926	13.3084	13.4983	6.03866	12.3998	2.0534
Gm16023	Gm16023	2.31416	2.06833	2.93067	3.56163	8.17991	3.27241	2.43772	5.00465	2.053
Npr3	Npr3	8.88497	15.9567	11.6187	28.3241	30.7453	15.7707	12.1534	24.9467	2.05264
Gm45709	Gm45709	1	1	1.96533	1	6.12851	1	1.32178	2.7095	2.04989
Cryba1	Cryba1	3.62832	1	4.86134	8.68489	4.0771	6.68103	3.16322	6.48101	2.04886
Ankrd2	Ankrd2	1	1	1.96533	6.12326	1	1	1.32178	2.70775	2.04857
Gm7734	Gm7734	1	1	1.96533	2.70775	1	4.40862	1.32178	2.70546	2.04683
Podxl2	Podxl2	1	3.13667	4.86134	8.68489	3.0514	6.68103	2.99933	6.13911	2.04682
Rbl2	Rbl2	39.1107	48.0067	95.6027	157.26	107.673	108.94	60.9067	124.624	2.04615
Zfp563	Zfp563	1	2.06833	2.93067	3.56163	2.0257	6.68103	1.99967	4.08945	2.04507
D430018E03Rik	D430018E03Rik	8.88497	3.13667	1	12.1004	11.257	3.27241	4.34055	8.87661	2.04504
Kdm1b	Kdm1b	25.9691	65.1	80.1574	105.173	130.238	114.621	57.0755	116.677	2.04426
Gm44327	Gm44327	1	2.06833	1.96533	6.12326	2.0257	2.13621	1.67789	3.42839	2.04328
Bivm	Bivm	12.8275	6.34167	28.0293	40.2783	25.6168	30.5414	15.7328	32.1455	2.04321
Brap	Brap	36.4824	53.3483	131.32	164.944	151.778	135.072	73.7169	150.598	2.04293
Ap4e1	Ap4e1	8.88497	14.8883	22.2373	30.0318	48.1823	15.7707	15.3369	31.3283	2.04267
Sntb1	Sntb1	11.5133	7.41	27.064	30.0318	27.6682	36.2224	15.3291	31.3075	2.04236
Ugt1a5	Ugt1a5	2.31416	1	1	2.70775	5.1028	1	1.43805	2.93685	2.04224
1700020L24Rik	1700020L24Rik	1	1	1	1.85388	1	3.27241	1	2.0421	2.0421
9230102O04Rik	9230102O04Rik	1	1	1	1.85388	1	3.27241	1	2.0421	2.0421
A330040F15Rik	A330040F15Rik	1	1	1	1.85388	1	3.27241	1	2.0421	2.0421
AC124709.3	AC124709.3	1	1	1	1.85388	1	3.27241	1	2.0421	2.0421
AC154380.1	AC154380.1	1	1	1	1.85388	1	3.27241	1	2.0421	2.0421
AC154724.1	AC154724.1	1	1	1	1.85388	1	3.27241	1	2.0421	2.0421
Arl13a	Arl13a	1	1	1	1.85388	1	3.27241	1	2.0421	2.0421
C030032O16Rik	C030032O16Rik	1	1	1	1.85388	1	3.27241	1	2.0421	2.0421
Cdhr5	Cdhr5	1	1	1	1.85388	1	3.27241	1	2.0421	2.0421
Cox20-ps	Cox20-ps	1	1	1	1.85388	1	3.27241	1	2.0421	2.0421
Gli1	Gli1	1	1	1	1.85388	1	3.27241	1	2.0421	2.0421
Gm11203	Gm11203	1	1	1	1.85388	1	3.27241	1	2.0421	2.0421
Gm12237	Gm12237	1	1	1	1.85388	1	3.27241	1	2.0421	2.0421
Gm12969	Gm12969	1	1	1	1.85388	1	3.27241	1	2.0421	2.0421
Gm13207	Gm13207	1	1	1	1.85388	1	3.27241	1	2.0421	2.0421
Gm13524	Gm13524	1	1	1	1.85388	1	3.27241	1	2.0421	2.0421
Gm14602	Gm14602	1	1	1	1.85388	1	3.27241	1	2.0421	2.0421
Gm15148	Gm15148	1	1	1	1.85388	1	3.27241	1	2.0421	2.0421
Gm15470	Gm15470	1	1	1	1.85388	1	3.27241	1	2.0421	2.0421
Gm15515	Gm15515	1	1	1	1.85388	1	3.27241	1	2.0421	2.0421
Gm15937	Gm15937	1	1	1	1.85388	1	3.27241	1	2.0421	2.0421
Gm17171	Gm17171	1	1	1	1.85388	1	3.27241	1	2.0421	2.0421
Gm20537	Gm20537	1	1	1	1.85388	1	3.27241	1	2.0421	2.0421
Gm26515	Gm26515	1	1	1	1.85388	1	3.27241	1	2.0421	2.0421
Gm32158	Gm32158	1	1	1	1.85388	1	3.27241	1	2.0421	2.0421
Gm44550	Gm44550	1	1	1	1.85388	1	3.27241	1	2.0421	2.0421
Gm5920	Gm5920	1	1	1	1.85388	1	3.27241	1	2.0421	2.0421
Gm6946	Gm6946	1	1	1	1.85388	1	3.27241	1	2.0421	2.0421
Gm8242	Gm8242	1	1	1	1.85388	1	3.27241	1	2.0421	2.0421
Gm9673	Gm9673	1	1	1	1.85388	1	3.27241	1	2.0421	2.0421
Mesp1	Mesp1	1	1	1	1.85388	1	3.27241	1	2.0421	2.0421
Mycbpap	Mycbpap	1	1	1	1.85388	1	3.27241	1	2.0421	2.0421
Rps12-ps22	Rps12-ps22	1	1	1	1.85388	1	3.27241	1	2.0421	2.0421
Ccser1	Ccser1	3.62832	6.34167	1.96533	6.97714	16.3855	1	3.97844	8.12089	2.04122
Mmp17	Mmp17	8.88497	2.06833	3.896	12.9543	6.12851	11.2259	4.94977	10.1029	2.04108
Nfil3	Nfil3	45.6815	49.075	77.2614	128.228	102.544	120.302	57.3393	117.025	2.04091
Smap1	Smap1	15.4558	20.23	24.168	39.4245	43.0538	39.631	19.9513	40.7031	2.04012
Gm5786	Gm5786	4.94249	6.34167	10.6533	7.83102	14.3341	22.5879	7.3125	14.9177	2.04003
Hsd17b13	Hsd17b13	6.25665	3.13667	5.82667	12.1004	2.0257	16.9069	5.07333	10.3443	2.03896
Gm44975	Gm44975	1	2.06833	1	5.26939	2.0257	1	1.35611	2.76503	2.03894
Ccsap	Ccsap	2.31416	2.06833	1	7.83102	1	2.13621	1.79417	3.65574	2.03757
Pabpc1l	Pabpc1l	2.31416	5.27333	1	5.26939	1	11.2259	2.8625	5.83175	2.03729
Hephl1	Hephl1	2.31416	5.27333	9.688	6.97714	11.257	16.9069	5.7585	11.7137	2.03415
Tmem30a	Tmem30a	83.7922	136.678	201.789	301.565	290.248	266.872	140.753	286.228	2.03354
Esrra	Esrra	12.8275	6.34167	7.75734	13.8082	19.4626	21.4517	8.97549	18.2408	2.03229
Serpina3d-ps	Serpina3d-ps	1	2.06833	1.96533	1.85388	5.1028	3.27241	1.67789	3.4097	2.03214
Timm29	Timm29	18.0841	29.845	47.336	91.511	34.8481	66.8999	31.755	64.4197	2.02864
Prkcq	Prkcq	11.5133	11.6833	12.584	25.7624	17.4112	29.4052	11.9269	24.1929	2.02844
Thada	Thada	24.6549	38.3917	43.4747	84.68	65.6192	65.7637	35.5071	72.021	2.02835
Pcdhb16	Pcdhb16	11.5133	8.47833	7.75734	12.9543	28.6939	14.6345	9.24966	18.7609	2.02828
Ect2	Ect2	18.0841	43.7333	114.909	135.913	88.1846	133.936	58.9089	119.344	2.02591
1700008A23Rik	1700008A23Rik	1	1	1	1	4.0771	1	1	2.0257	2.0257
1700057H21Rik	1700057H21Rik	1	1	1	1	4.0771	1	1	2.0257	2.0257
4632404M16Rik	4632404M16Rik	1	1	1	1	4.0771	1	1	2.0257	2.0257
AC073562.1	AC073562.1	1	1	1	1	4.0771	1	1	2.0257	2.0257
AC129590.1	AC129590.1	1	1	1	1	4.0771	1	1	2.0257	2.0257
AC157650.2	AC157650.2	1	1	1	1	4.0771	1	1	2.0257	2.0257
BC028777	BC028777	1	1	1	1	4.0771	1	1	2.0257	2.0257
Fgl1	Fgl1	1	1	1	1	4.0771	1	1	2.0257	2.0257
Fndc8	Fndc8	1	1	1	1	4.0771	1	1	2.0257	2.0257
Gm10306	Gm10306	1	1	1	1	4.0771	1	1	2.0257	2.0257
Gm10459	Gm10459	1	1	1	1	4.0771	1	1	2.0257	2.0257
Gm13090	Gm13090	1	1	1	1	4.0771	1	1	2.0257	2.0257
Gm20501	Gm20501	1	1	1	1	4.0771	1	1	2.0257	2.0257
Gm22200	Gm22200	1	1	1	1	4.0771	1	1	2.0257	2.0257
Gm23332	Gm23332	1	1	1	1	4.0771	1	1	2.0257	2.0257
Gm25223	Gm25223	1	1	1	1	4.0771	1	1	2.0257	2.0257
Gm35013	Gm35013	1	1	1	1	4.0771	1	1	2.0257	2.0257
Gm37490	Gm37490	1	1	1	1	4.0771	1	1	2.0257	2.0257
Gm38277	Gm38277	1	1	1	1	4.0771	1	1	2.0257	2.0257
Gm42711	Gm42711	1	1	1	1	4.0771	1	1	2.0257	2.0257
Gm43102	Gm43102	1	1	1	1	4.0771	1	1	2.0257	2.0257
Gm44043	Gm44043	1	1	1	1	4.0771	1	1	2.0257	2.0257
Gm45033	Gm45033	1	1	1	1	4.0771	1	1	2.0257	2.0257
Gm45746	Gm45746	1	1	1	1	4.0771	1	1	2.0257	2.0257
Gm4886	Gm4886	1	1	1	1	4.0771	1	1	2.0257	2.0257
Gm5533	Gm5533	1	1	1	1	4.0771	1	1	2.0257	2.0257
Gm6261	Gm6261	1	1	1	1	4.0771	1	1	2.0257	2.0257
Gm9520	Gm9520	1	1	1	1	4.0771	1	1	2.0257	2.0257
Gm9768	Gm9768	1	1	1	1	4.0771	1	1	2.0257	2.0257
Prrt2	Prrt2	1	1	1	1	4.0771	1	1	2.0257	2.0257
Rims3	Rims3	1	1	1	1	4.0771	1	1	2.0257	2.0257
Scnn1b	Scnn1b	1	1	1	1	4.0771	1	1	2.0257	2.0257
Sel1l3	Sel1l3	1	1	1	1	4.0771	1	1	2.0257	2.0257
Smoc1	Smoc1	1	1	1	1	4.0771	1	1	2.0257	2.0257
Tecta	Tecta	1	1	1	1	4.0771	1	1	2.0257	2.0257
Zcchc18	Zcchc18	1	1	1	1	4.0771	1	1	2.0257	2.0257
Gm44006	Gm44006	1	2.06833	1	1	5.1028	2.13621	1.35611	2.74634	2.02516
Itga1	Itga1	1	2.06833	1	1	5.1028	2.13621	1.35611	2.74634	2.02516
Sfta2	Sfta2	1	2.06833	1	1	5.1028	2.13621	1.35611	2.74634	2.02516
Noxo1	Noxo1	1	3.13667	1.96533	6.12326	4.0771	2.13621	2.034	4.11219	2.02173
Cilp	Cilp	3.62832	1	1	5.26939	5.1028	1	1.87611	3.79073	2.02053
Ccdc167	Ccdc167	6.25665	1	5.82667	7.83102	5.1028	13.4983	4.36111	8.8107	2.02029
Rfx5	Rfx5	4.94249	5.27333	2.93067	14.662	4.0771	7.81724	4.38216	8.85212	2.02004
4930432K21Rik	4930432K21Rik	1	1	1.96533	2.70775	2.0257	3.27241	1.32178	2.66862	2.01896
CT025678.1	CT025678.1	1	1	1.96533	2.70775	2.0257	3.27241	1.32178	2.66862	2.01896
Gm22270	Gm22270	1	1	1.96533	2.70775	2.0257	3.27241	1.32178	2.66862	2.01896
Gm5575	Gm5575	1	1	1.96533	2.70775	2.0257	3.27241	1.32178	2.66862	2.01896
2019-03-01	2019-03-01	1	1	1.96533	2.70775	2.0257	3.27241	1.32178	2.66862	2.01896
Mir7237	Mir7237	1	1	1.96533	2.70775	2.0257	3.27241	1.32178	2.66862	2.01896
AC129019.1	AC129019.1	3.62832	4.205	3.896	8.68489	7.15421	7.81724	3.90978	7.88545	2.01685
Rapgef4os3	Rapgef4os3	1	5.27333	1.96533	5.26939	9.20561	2.13621	2.74622	5.53707	2.01625
Ppfia4	Ppfia4	3.62832	6.34167	1.96533	11.2465	6.12851	6.68103	3.97844	8.01869	2.01553
Krt17	Krt17	529.293	444.358	694.11	580.783	736.428	2042.76	555.92	1119.99	2.01466
Gm12536	Gm12536	1	3.13667	1	5.26939	4.0771	1	1.71222	3.44883	2.01424
Gdap1l1	Gdap1l1	2.31416	1	1	4.41551	1	3.27241	1.43805	2.89597	2.01381
Bak1	Bak1	2.31416	1	1.96533	4.41551	4.0771	2.13621	1.75983	3.54294	2.01323
Gm43654	Gm43654	2.31416	7.41	5.82667	10.3926	15.3598	5.54482	5.18361	10.4324	2.01258
Gm2366	Gm2366	11.5133	9.54667	6.792	28.3241	15.3598	12.3621	9.28399	18.682	2.01228
Gm42372	Gm42372	2.31416	1	1	1	1	6.68103	1.43805	2.89368	2.01222
Gm10163	Gm10163	2.31416	1	1.96533	1	4.0771	5.54482	1.75983	3.54064	2.01192
Gm45628	Gm45628	2.31416	1	1.96533	1	4.0771	5.54482	1.75983	3.54064	2.01192
Mill1	Mill1	7.57081	10.615	3.896	9.53877	12.2827	22.5879	7.3606	14.8031	2.01113
Gm5341	Gm5341	1	2.06833	1	1.85388	3.0514	3.27241	1.35611	2.7259	2.01008
Slc16a4	Slc16a4	2.31416	9.54667	1.96533	7.83102	3.0514	16.9069	4.60872	9.2631	2.00991
Tppp	Tppp	70.6506	74.715	190.205	263.994	249.22	161.205	111.857	224.806	2.00976
Gm45493	Gm45493	1	2.06833	1.96533	6.97714	1	2.13621	1.67789	3.37112	2.00914
B3gnt6	B3gnt6	2.31416	4.205	2.93067	6.97714	3.0514	8.95344	3.14994	6.32733	2.00871
Cd160	Cd160	3.62832	1	1	2.70775	3.0514	5.54482	1.87611	3.76799	2.00841
Sema6b	Sema6b	3.62832	1	1	2.70775	3.0514	5.54482	1.87611	3.76799	2.00841
Sh2b3	Sh2b3	57.509	46.9383	84.0187	142.744	130.238	105.531	62.822	126.171	2.00839
Slc16a7	Slc16a7	1	6.34167	8.72267	6.12326	9.20561	16.9069	5.35478	10.7453	2.00667
Gipr	Gipr	2.31416	2.06833	1	3.56163	5.1028	2.13621	1.79417	3.60021	2.00662
Gm12275	Gm12275	2.31416	2.06833	1	3.56163	5.1028	2.13621	1.79417	3.60021	2.00662
4930483K19Rik	4930483K19Rik	1	1	1.96533	1.85388	5.1028	1	1.32178	2.65223	2.00656
Gm13833	Gm13833	1	1	1.96533	1.85388	5.1028	1	1.32178	2.65223	2.00656
Gm43268	Gm43268	1	1	1.96533	1.85388	5.1028	1	1.32178	2.65223	2.00656
Akr1c19	Akr1c19	4.94249	1	1	4.41551	5.1028	4.40862	2.31416	4.64231	2.00604
4930524O07Rik	4930524O07Rik	1	1	1	1.85388	2.0257	2.13621	1	2.00526	2.00526
4930580E04Rik	4930580E04Rik	1	1	1	1.85388	2.0257	2.13621	1	2.00526	2.00526
AC154575.1	AC154575.1	1	1	1	1.85388	2.0257	2.13621	1	2.00526	2.00526
Arl5c	Arl5c	1	1	1	1.85388	2.0257	2.13621	1	2.00526	2.00526
Catsperg1	Catsperg1	1	1	1	1.85388	2.0257	2.13621	1	2.00526	2.00526
Ccdc92b	Ccdc92b	1	1	1	1.85388	2.0257	2.13621	1	2.00526	2.00526
Gas2l2	Gas2l2	1	1	1	1.85388	2.0257	2.13621	1	2.00526	2.00526
Gm11658	Gm11658	1	1	1	1.85388	2.0257	2.13621	1	2.00526	2.00526
Gm12094	Gm12094	1	1	1	1.85388	2.0257	2.13621	1	2.00526	2.00526
Gm12219	Gm12219	1	1	1	1.85388	2.0257	2.13621	1	2.00526	2.00526
Gm13179	Gm13179	1	1	1	1.85388	2.0257	2.13621	1	2.00526	2.00526
Gm17771	Gm17771	1	1	1	1.85388	2.0257	2.13621	1	2.00526	2.00526
Gm24592	Gm24592	1	1	1	1.85388	2.0257	2.13621	1	2.00526	2.00526
Gm24650	Gm24650	1	1	1	1.85388	2.0257	2.13621	1	2.00526	2.00526
Gm26537	Gm26537	1	1	1	1.85388	2.0257	2.13621	1	2.00526	2.00526
Gm29138	Gm29138	1	1	1	1.85388	2.0257	2.13621	1	2.00526	2.00526
Gm37946	Gm37946	1	1	1	1.85388	2.0257	2.13621	1	2.00526	2.00526
Gm7542	Gm7542	1	1	1	1.85388	2.0257	2.13621	1	2.00526	2.00526
Gm8492	Gm8492	1	1	1	1.85388	2.0257	2.13621	1	2.00526	2.00526
Lhx6	Lhx6	1	1	1	1.85388	2.0257	2.13621	1	2.00526	2.00526
Mir6917	Mir6917	1	1	1	1.85388	2.0257	2.13621	1	2.00526	2.00526
Mir98	Mir98	1	1	1	1.85388	2.0257	2.13621	1	2.00526	2.00526
Rpl35a-ps6	Rpl35a-ps6	1	1	1	1.85388	2.0257	2.13621	1	2.00526	2.00526
Tmc1	Tmc1	1	1	1	1.85388	2.0257	2.13621	1	2.00526	2.00526
Tmcc2	Tmcc2	1	1	1	1.85388	2.0257	2.13621	1	2.00526	2.00526
Mir17hg	Mir17hg	68.0223	137.747	138.077	266.556	207.166	215.743	114.615	229.822	2.00515
Gm37186	Gm37186	3.62832	3.13667	1	3.56163	3.0514	8.95344	2.58833	5.18883	2.0047
Igfals	Igfals	6.25665	1	1	6.12326	7.15421	3.27241	2.75222	5.51663	2.00443
Mab21l3	Mab21l3	1	9.54667	4.86134	4.41551	6.12851	20.3155	5.136	10.2865	2.00282
Gm15440	Gm15440	1	3.13667	1	2.70775	2.0257	5.54482	1.71222	3.42609	2.00096
Zbtb46	Zbtb46	2.31416	5.27333	8.72267	8.68489	8.17991	15.7707	5.43672	10.8785	2.00093
Creb3l1	Creb3l1	2.31416	3.13667	1	4.41551	4.0771	4.40862	2.15028	4.30041	1.99993
Pemt	Pemt	1	3.13667	9.688	13.8082	7.15421	6.68103	4.60822	9.21446	1.99957
Gm29427	Gm29427	3.62832	3.13667	1.96533	7.83102	4.0771	5.54482	2.91011	5.81765	1.99912
Tssk3	Tssk3	1	2.06833	2.93067	4.41551	2.0257	5.54482	1.99967	3.99534	1.998
Spr-ps1	Spr-ps1	1	2.06833	1.96533	2.70775	4.0771	3.27241	1.67789	3.35242	1.998
Gm10819	Gm10819	15.4558	12.7517	8.72267	24.9086	19.4626	29.4052	12.31	24.5921	1.99773
AC140299.1	AC140299.1	2.31416	3.13667	6.792	10.3926	5.1028	8.95344	4.08094	8.14963	1.997
Fam184b	Fam184b	1	2.06833	1	2.70775	1	4.40862	1.35611	2.70546	1.99501
Gm26513	Gm26513	1	2.06833	1	2.70775	1	4.40862	1.35611	2.70546	1.99501
Spata21	Spata21	2.31416	3.13667	2.93067	1.85388	8.17991	6.68103	2.79383	5.57161	1.99425
Gmfb	Gmfb	50.9382	117.448	272.259	310.957	304.608	262.327	146.882	292.631	1.99229
Gm26752	Gm26752	16.7699	10.615	14.5147	32.5935	32.7967	18.0431	13.9665	27.8111	1.99127
Gm37646	Gm37646	1	1	1.96533	2.70775	3.0514	2.13621	1.32178	2.63179	1.9911
Kcnk6	Kcnk6	6.25665	5.27333	5.82667	12.9543	9.20561	12.3621	5.78555	11.5073	1.98898
Pygm	Pygm	2.31416	7.41	4.86134	13.8082	5.1028	10.0896	4.86183	9.66687	1.98832
Gm5141	Gm5141	2.31416	1	1	4.41551	2.0257	2.13621	1.43805	2.85914	1.9882
Zfp964	Zfp964	1	4.205	10.6533	12.1004	8.17991	11.2259	5.28611	10.5021	1.98673
Gm45873	Gm45873	2.31416	1	1	1	2.0257	5.54482	1.43805	2.85684	1.9866
Nedd1	Nedd1	19.3983	39.46	47.336	65.0408	58.4393	87.3517	35.3981	70.2772	1.98534
St5	St5	16.7699	31.9817	24.168	38.5706	35.8738	70.3086	24.3065	48.251	1.9851
C030015A19Rik	C030015A19Rik	1	2.06833	4.86134	2.70775	4.0771	8.95344	2.64322	5.2461	1.98474
Osbpl10	Osbpl10	3.62832	2.06833	2.93067	4.41551	7.15421	5.54482	2.87578	5.70485	1.98376
Spin4	Spin4	1	4.205	1.96533	1.85388	10.2313	2.13621	2.39011	4.74046	1.98337
Gm18553	Gm18553	1	3.13667	4.86134	6.97714	3.0514	7.81724	2.99933	5.94859	1.9833
Cdk18	Cdk18	1	2.06833	1	1.85388	4.0771	2.13621	1.35611	2.68906	1.98292
Tmem25	Tmem25	2.31416	2.06833	4.86134	8.68489	4.0771	5.54482	3.08128	6.10227	1.98044
Susd1	Susd1	1	3.13667	4.86134	11.2465	1	5.54482	2.99933	5.93045	1.97726
Cep120	Cep120	18.0841	26.64	34.7867	47.1094	63.5678	46.4482	26.5036	52.3751	1.97615
Gm14335	Gm14335	1	4.205	1.96533	2.70775	8.17991	3.27241	2.39011	4.72002	1.97481
Gm10653	Gm10653	1	5.27333	1.96533	3.56163	7.15421	5.54482	2.74622	5.42022	1.9737
2010016I18Rik	2010016I18Rik	3.62832	5.27333	1.96533	4.41551	9.20561	7.81724	3.62233	7.14612	1.9728
Tmem8b	Tmem8b	1	3.13667	3.896	3.56163	11.257	1	2.67756	5.27288	1.96929
Gm45872	Gm45872	1	3.13667	1	6.97714	1	2.13621	1.71222	3.37112	1.96885
1600002D24Rik	1600002D24Rik	1	1	1	1.85388	3.0514	1	1	1.96843	1.96843
9530046B11Rik	9530046B11Rik	1	1	1	1.85388	3.0514	1	1	1.96843	1.96843
AC132260.1	AC132260.1	1	1	1	1.85388	3.0514	1	1	1.96843	1.96843
AC141425.1	AC141425.1	1	1	1	1.85388	3.0514	1	1	1.96843	1.96843
AC154506.1	AC154506.1	1	1	1	1.85388	3.0514	1	1	1.96843	1.96843
AC154573.2	AC154573.2	1	1	1	1.85388	3.0514	1	1	1.96843	1.96843
Adamts2	Adamts2	1	1	1	1.85388	3.0514	1	1	1.96843	1.96843
Alkal2	Alkal2	1	1	1	1.85388	3.0514	1	1	1.96843	1.96843
Ankrd31	Ankrd31	1	1	1	1.85388	3.0514	1	1	1.96843	1.96843
BC067074	BC067074	1	1	1	1.85388	3.0514	1	1	1.96843	1.96843
Cdkl4	Cdkl4	1	1	1	1.85388	3.0514	1	1	1.96843	1.96843
Cel	Cel	1	1	1	1.85388	3.0514	1	1	1.96843	1.96843
Dnah3	Dnah3	1	1	1	1.85388	3.0514	1	1	1.96843	1.96843
Gm10221	Gm10221	1	1	1	1.85388	3.0514	1	1	1.96843	1.96843
Gm11877	Gm11877	1	1	1	1.85388	3.0514	1	1	1.96843	1.96843
Gm13651	Gm13651	1	1	1	1.85388	3.0514	1	1	1.96843	1.96843
Gm15934	Gm15934	1	1	1	1.85388	3.0514	1	1	1.96843	1.96843
Gm16179	Gm16179	1	1	1	1.85388	3.0514	1	1	1.96843	1.96843
Gm16206	Gm16206	1	1	1	1.85388	3.0514	1	1	1.96843	1.96843
Gm18000	Gm18000	1	1	1	1.85388	3.0514	1	1	1.96843	1.96843
Gm26766	Gm26766	1	1	1	1.85388	3.0514	1	1	1.96843	1.96843
Gm27942	Gm27942	1	1	1	1.85388	3.0514	1	1	1.96843	1.96843
Gm28707	Gm28707	1	1	1	1.85388	3.0514	1	1	1.96843	1.96843
Gm45363	Gm45363	1	1	1	1.85388	3.0514	1	1	1.96843	1.96843
Gm6457	Gm6457	1	1	1	1.85388	3.0514	1	1	1.96843	1.96843
Mir27a	Mir27a	1	1	1	1.85388	3.0514	1	1	1.96843	1.96843
Myrf	Myrf	1	1	1	1.85388	3.0514	1	1	1.96843	1.96843
Pbp2	Pbp2	1	1	1	1.85388	3.0514	1	1	1.96843	1.96843
Rpl9-ps8	Rpl9-ps8	1	1	1	1.85388	3.0514	1	1	1.96843	1.96843
Sec16b	Sec16b	1	1	1	1.85388	3.0514	1	1	1.96843	1.96843
Tmem221	Tmem221	1	1	1	1.85388	3.0514	1	1	1.96843	1.96843
4933431K23Rik	4933431K23Rik	1	2.06833	1	2.70775	2.0257	3.27241	1.35611	2.66862	1.96785
H2-Bl	H2-Bl	1	2.06833	1	2.70775	2.0257	3.27241	1.35611	2.66862	1.96785
Gm42502	Gm42502	2.31416	4.205	5.82667	9.53877	9.20561	5.54482	4.11528	8.0964	1.9674
Ino80dos	Ino80dos	6.25665	3.13667	9.688	13.8082	10.2313	13.4983	6.36044	12.5126	1.96725
AC154828.1	AC154828.1	3.62832	3.13667	1.96533	8.68489	4.0771	4.40862	2.91011	5.72354	1.96678
Gm42989	Gm42989	1	1	3.896	5.26939	3.0514	3.27241	1.96533	3.8644	1.96628
Pla2g4c	Pla2g4c	7.57081	7.41	11.6187	18.0775	18.4369	15.7707	8.86649	17.4284	1.96564
Fam126a	Fam126a	22.0266	57.6217	72.4347	109.442	86.1332	103.259	50.6943	99.6114	1.96494
Greb1l	Greb1l	11.5133	7.41	4.86134	18.9314	4.0771	23.7241	7.92821	15.5775	1.96482
Limk1	Limk1	2.31416	3.13667	1	1	6.12851	5.54482	2.15028	4.22444	1.9646
B230317F23Rik	B230317F23Rik	1	1	4.86134	6.12326	4.0771	3.27241	2.28711	4.49093	1.96358
Gm45441	Gm45441	2.31416	1	1	4.41551	3.0514	1	1.43805	2.8223	1.96259
Gm9419	Gm9419	2.31416	1	1	1	3.0514	4.40862	1.43805	2.82001	1.96099
Wfs1	Wfs1	4.94249	9.54667	20.3067	35.1551	18.4369	14.6345	11.5986	22.7422	1.96077
Birc2	Birc2	36.4824	39.46	50.232	88.9493	67.6706	90.7603	42.0581	82.4601	1.96062
H2-DMb1	H2-DMb1	3.62832	3.13667	9.688	2.70775	9.20561	20.3155	5.48433	10.743	1.95884
AV356131	AV356131	1	3.13667	1	2.70775	4.0771	3.27241	1.71222	3.35242	1.95794
Gm38384	Gm38384	1	2.06833	1	1.85388	5.1028	1	1.35611	2.65223	1.95576
Gm16071	Gm16071	4.94249	1	1.96533	6.97714	4.0771	4.40862	2.63594	5.15429	1.95539
Cyp7b1	Cyp7b1	1	6.34167	1	1	4.0771	11.2259	2.78056	5.43432	1.9544
Nat8f4	Nat8f4	1	6.34167	1.96533	5.26939	5.1028	7.81724	3.10233	6.06314	1.95438
Zfp174	Zfp174	6.25665	4.205	2.93067	6.97714	10.2313	8.95344	4.46411	8.72063	1.9535
Tfap4	Tfap4	3.62832	1	6.792	8.68489	9.20561	4.40862	3.80678	7.43304	1.95258
Il7	Il7	11.5133	11.6833	20.3067	22.3469	29.7196	32.8138	14.5011	28.2934	1.95112
Gm13921	Gm13921	2.31416	2.06833	2.93067	4.41551	2.0257	7.81724	2.43772	4.75282	1.9497
Eml5	Eml5	12.8275	20.23	2.93067	28.3241	21.514	20.3155	11.996	23.3845	1.94935
4430402I18Rik	4430402I18Rik	1	1	1	2.70775	1	2.13621	1	1.94799	1.94799
4930588G17Rik	4930588G17Rik	1	1	1	2.70775	1	2.13621	1	1.94799	1.94799
4933439K11Rik	4933439K11Rik	1	1	1	2.70775	1	2.13621	1	1.94799	1.94799
Art5	Art5	1	1	1	2.70775	1	2.13621	1	1.94799	1.94799
Cap2	Cap2	1	1	1	2.70775	1	2.13621	1	1.94799	1.94799
Cfap77	Cfap77	1	1	1	2.70775	1	2.13621	1	1.94799	1.94799
D830044I16Rik	D830044I16Rik	1	1	1	2.70775	1	2.13621	1	1.94799	1.94799
Fam71d	Fam71d	1	1	1	2.70775	1	2.13621	1	1.94799	1.94799
Fstl1	Fstl1	1	1	1	2.70775	1	2.13621	1	1.94799	1.94799
Gm12118	Gm12118	1	1	1	2.70775	1	2.13621	1	1.94799	1.94799
Gm15566	Gm15566	1	1	1	2.70775	1	2.13621	1	1.94799	1.94799
Gm15839	Gm15839	1	1	1	2.70775	1	2.13621	1	1.94799	1.94799
Gm16335	Gm16335	1	1	1	2.70775	1	2.13621	1	1.94799	1.94799
Gm26588	Gm26588	1	1	1	2.70775	1	2.13621	1	1.94799	1.94799
Gm26672	Gm26672	1	1	1	2.70775	1	2.13621	1	1.94799	1.94799
Gm27711	Gm27711	1	1	1	2.70775	1	2.13621	1	1.94799	1.94799
Gm28183	Gm28183	1	1	1	2.70775	1	2.13621	1	1.94799	1.94799
Gm38070	Gm38070	1	1	1	2.70775	1	2.13621	1	1.94799	1.94799
Gm38148	Gm38148	1	1	1	2.70775	1	2.13621	1	1.94799	1.94799
Gm44066	Gm44066	1	1	1	2.70775	1	2.13621	1	1.94799	1.94799
Gm44706	Gm44706	1	1	1	2.70775	1	2.13621	1	1.94799	1.94799
Gm5931	Gm5931	1	1	1	2.70775	1	2.13621	1	1.94799	1.94799
Gm7977	Gm7977	1	1	1	2.70775	1	2.13621	1	1.94799	1.94799
Iglon5	Iglon5	1	1	1	2.70775	1	2.13621	1	1.94799	1.94799
Irx1	Irx1	1	1	1	2.70775	1	2.13621	1	1.94799	1.94799
L1td1	L1td1	1	1	1	2.70775	1	2.13621	1	1.94799	1.94799
Loxl3	Loxl3	1	1	1	2.70775	1	2.13621	1	1.94799	1.94799
Mir1955	Mir1955	1	1	1	2.70775	1	2.13621	1	1.94799	1.94799
Mir6339	Mir6339	1	1	1	2.70775	1	2.13621	1	1.94799	1.94799
Mir7063	Mir7063	1	1	1	2.70775	1	2.13621	1	1.94799	1.94799
Noxred1	Noxred1	1	1	1	2.70775	1	2.13621	1	1.94799	1.94799
Osbpl6	Osbpl6	1	1	1	2.70775	1	2.13621	1	1.94799	1.94799
Pla2r1	Pla2r1	1	1	1	2.70775	1	2.13621	1	1.94799	1.94799
Ptgdr	Ptgdr	1	1	1	2.70775	1	2.13621	1	1.94799	1.94799
Rnf157	Rnf157	1	1	1	2.70775	1	2.13621	1	1.94799	1.94799
Sema6d	Sema6d	1	1	1	2.70775	1	2.13621	1	1.94799	1.94799
Serpina3e-ps	Serpina3e-ps	1	1	1	2.70775	1	2.13621	1	1.94799	1.94799
Shbg	Shbg	1	1	1	2.70775	1	2.13621	1	1.94799	1.94799
Spocd1	Spocd1	1	1	1	2.70775	1	2.13621	1	1.94799	1.94799
Wnt2	Wnt2	1	1	1	2.70775	1	2.13621	1	1.94799	1.94799
Gm42809	Gm42809	2.31416	3.13667	1.96533	10.3926	3.0514	1	2.47205	4.81468	1.94764
Gm29609	Gm29609	1	1	2.93067	4.41551	3.0514	2.13621	1.64356	3.20104	1.94763
Papss2	Papss2	4.94249	10.615	5.82667	10.3926	14.3341	16.9069	7.12805	13.8779	1.94694
Ctsk	Ctsk	2.31416	1	1	1.85388	1	5.54482	1.43805	2.79957	1.94677
CU024892.1	CU024892.1	1	1	4.86134	2.70775	5.1028	5.54482	2.28711	4.45179	1.94647
AC159238.1	AC159238.1	2.31416	1	5.82667	2.70775	6.12851	8.95344	3.04694	5.9299	1.94618
Gm38215	Gm38215	1	3.13667	1	3.56163	2.0257	4.40862	1.71222	3.33198	1.946
Flvcr1	Flvcr1	24.6549	18.0933	39.6134	88.9493	32.7967	38.4948	27.4539	53.4136	1.94558
Zfp324	Zfp324	2.31416	11.6833	9.688	17.2237	15.3598	13.4983	7.89517	15.3606	1.94557
Sft2d3	Sft2d3	2.31416	9.54667	5.82667	18.0775	5.1028	11.2259	5.89583	11.4687	1.94523
Me3	Me3	7.57081	4.205	1.96533	5.26939	10.2313	11.2259	4.58038	8.90885	1.945
Vps37a	Vps37a	62.7656	81.125	140.008	215.323	173.318	163.477	94.6329	184.039	1.94477
Il6	Il6	4.94249	5.27333	11.6187	3.56163	17.4112	21.4517	7.27816	14.1415	1.94301
Gm10566	Gm10566	1	2.06833	1	2.70775	3.0514	2.13621	1.35611	2.63179	1.94069
Rrm2b	Rrm2b	11.5133	24.5033	23.2027	37.7167	42.028	35.0862	19.7398	38.277	1.93908
Oas1b	Oas1b	1	3.13667	1	2.70775	5.1028	2.13621	1.71222	3.31559	1.93642
Gm14508	Gm14508	4.94249	4.205	3.896	6.97714	8.17991	10.0896	4.34783	8.41557	1.93558
Sox10	Sox10	1	1	2.93067	5.26939	1	3.27241	1.64356	3.1806	1.93519
Slc25a18	Slc25a18	6.25665	3.13667	2.93067	11.2465	8.17991	4.40862	4.10799	7.94502	1.93404
4930412B13Rik	4930412B13Rik	1	1	2.93067	1.85388	1	6.68103	1.64356	3.1783	1.9338
4930534D22Rik	4930534D22Rik	1	1	2.93067	1.85388	1	6.68103	1.64356	3.1783	1.9338
Gm45630	Gm45630	1	3.13667	3.896	6.12326	6.12851	3.27241	2.67756	5.17473	1.93263
AC022775.2	AC022775.2	2.31416	3.13667	1.96533	1.85388	9.20561	3.27241	2.47205	4.7773	1.93252
Gm43312	Gm43312	3.62832	2.06833	3.896	8.68489	2.0257	7.81724	3.19755	6.17594	1.93146
Gm14267	Gm14267	2.31416	3.13667	1.96533	3.56163	4.0771	6.68103	2.47205	4.77326	1.93089
Gm20541	Gm20541	1	3.13667	2.93067	5.26939	5.1028	3.27241	2.35578	4.5482	1.93066
Gm19898	Gm19898	3.62832	2.06833	1.96533	5.26939	5.1028	4.40862	2.554	4.92694	1.92911
Dtwd2	Dtwd2	2.31416	6.34167	5.82667	9.53877	7.15421	11.2259	4.8275	9.30628	1.92776
Slc2a6	Slc2a6	2.31416	5.27333	1	6.12326	7.15421	3.27241	2.8625	5.51663	1.92721
Impg2	Impg2	3.62832	1	1	1	2.0257	7.81724	1.87611	3.61431	1.92649
Micu2	Micu2	187.611	139.883	339.832	456.117	430.769	398.672	222.442	428.519	1.92643
Col9a3	Col9a3	2.31416	1	1.96533	2.70775	3.0514	4.40862	1.75983	3.38926	1.9259
Calml4	Calml4	1	3.13667	4.86134	1	5.1028	11.2259	2.99933	5.77622	1.92583
Gm6378	Gm6378	1	2.06833	1	3.56163	1	3.27241	1.35611	2.61135	1.92561
Inpp5e	Inpp5e	20.7124	33.05	19.3413	47.9632	44.0795	48.7207	24.3679	46.9211	1.92553
Col1a2	Col1a2	1	1	2.93067	4.41551	4.0771	1	1.64356	3.1642	1.92522
Ctxn1	Ctxn1	2.31416	1	4.86134	2.70775	4.0771	8.95344	2.72517	5.2461	1.92506
Nlrc3	Nlrc3	3.62832	3.13667	1	6.12326	1	7.81724	2.58833	4.98017	1.92408
Heph	Heph	32.5399	34.1183	46.3707	59.9175	75.8762	81.6706	37.6763	72.4881	1.92397
AC154562.1	AC154562.1	1	1	2.93067	1	4.0771	4.40862	1.64356	3.16191	1.92382
Rflna	Rflna	3.62832	1	2.93067	3.56163	2.0257	8.95344	2.51966	4.84692	1.92364
Gm16536	Gm16536	8.88497	3.13667	1.96533	6.12326	6.12851	14.6345	4.66233	8.96208	1.92223
Itpa-ps1	Itpa-ps1	3.62832	1	1.96533	1	6.12851	5.54482	2.19789	4.22444	1.92205
Lgi3	Lgi3	1	3.13667	2.93067	6.12326	3.0514	4.40862	2.35578	4.52776	1.92198
Dlgap1	Dlgap1	3.62832	4.205	4.86134	6.12326	8.17991	10.0896	4.23155	8.13094	1.9215
Corin	Corin	3.62832	1	1.96533	2.70775	1	8.95344	2.19789	4.2204	1.92021
G630022F23Rik	G630022F23Rik	1	1	1.96533	3.56163	3.0514	1	1.32178	2.53768	1.9199
Rnu73b	Rnu73b	1	1	1.96533	3.56163	3.0514	1	1.32178	2.53768	1.9199
Gm28659	Gm28659	2.31416	2.06833	2.93067	4.41551	4.0771	5.54482	2.43772	4.67915	1.91948
Soga1	Soga1	2.31416	25.5717	9.688	30.0318	19.4626	22.5879	12.5246	24.0275	1.91842
Nmnat1	Nmnat1	2.31416	6.34167	15.48	16.3698	16.3855	13.4983	8.04528	15.4179	1.91639
Gm5837	Gm5837	2.31416	3.13667	1.96533	3.56163	5.1028	5.54482	2.47205	4.73642	1.91599
1810014B01Rik	1810014B01Rik	7.57081	7.41	6.792	19.7853	16.3855	5.54482	7.25761	13.9052	1.91595
Gm7722	Gm7722	3.62832	4.205	1.96533	6.97714	5.1028	6.68103	3.26622	6.25366	1.91465
Gm13840	Gm13840	1	2.06833	1	2.70775	4.0771	1	1.35611	2.59495	1.91353
Mef2b	Mef2b	1	2.06833	1	2.70775	4.0771	1	1.35611	2.59495	1.91353
Gm5422	Gm5422	1	3.13667	2.93067	6.97714	1	5.54482	2.35578	4.50732	1.9133
Gm37677	Gm37677	4.94249	5.27333	6.792	12.1004	9.20561	11.2259	5.66927	10.844	1.91276
Gm26542	Gm26542	2.31416	3.13667	2.93067	5.26939	4.0771	6.68103	2.79383	5.34251	1.91225
Gm17060	Gm17060	1	1	2.93067	1.85388	2.0257	5.54482	1.64356	3.14147	1.91138
1700125H20Rik	1700125H20Rik	1	1	1	2.70775	2.0257	1	1	1.91115	1.91115
8430432A02Rik	8430432A02Rik	1	1	1	2.70775	2.0257	1	1	1.91115	1.91115
Actn3	Actn3	1	1	1	2.70775	2.0257	1	1	1.91115	1.91115
D5Ertd605e	D5Ertd605e	1	1	1	2.70775	2.0257	1	1	1.91115	1.91115
Gm12112	Gm12112	1	1	1	2.70775	2.0257	1	1	1.91115	1.91115
Gm12522	Gm12522	1	1	1	2.70775	2.0257	1	1	1.91115	1.91115
Gm13624	Gm13624	1	1	1	2.70775	2.0257	1	1	1.91115	1.91115
Gm15491	Gm15491	1	1	1	2.70775	2.0257	1	1	1.91115	1.91115
Gm16425	Gm16425	1	1	1	2.70775	2.0257	1	1	1.91115	1.91115
Gm20686	Gm20686	1	1	1	2.70775	2.0257	1	1	1.91115	1.91115
Gm25986	Gm25986	1	1	1	2.70775	2.0257	1	1	1.91115	1.91115
Gm26616	Gm26616	1	1	1	2.70775	2.0257	1	1	1.91115	1.91115
Gm32460	Gm32460	1	1	1	2.70775	2.0257	1	1	1.91115	1.91115
Gm43966	Gm43966	1	1	1	2.70775	2.0257	1	1	1.91115	1.91115
Gm44175	Gm44175	1	1	1	2.70775	2.0257	1	1	1.91115	1.91115
Gm44378	Gm44378	1	1	1	2.70775	2.0257	1	1	1.91115	1.91115
Gm45845	Gm45845	1	1	1	2.70775	2.0257	1	1	1.91115	1.91115
Gm8034	Gm8034	1	1	1	2.70775	2.0257	1	1	1.91115	1.91115
Hist1h4a	Hist1h4a	1	1	1	2.70775	2.0257	1	1	1.91115	1.91115
Idi2	Idi2	1	1	1	2.70775	2.0257	1	1	1.91115	1.91115
Meioc	Meioc	1	1	1	2.70775	2.0257	1	1	1.91115	1.91115
Optc	Optc	1	1	1	2.70775	2.0257	1	1	1.91115	1.91115
Paqr9	Paqr9	1	1	1	2.70775	2.0257	1	1	1.91115	1.91115
Rtbdn	Rtbdn	1	1	1	2.70775	2.0257	1	1	1.91115	1.91115
Snord91a	Snord91a	1	1	1	2.70775	2.0257	1	1	1.91115	1.91115
Snora17	Snora17	1	3.13667	1.96533	4.41551	5.1028	2.13621	2.034	3.88484	1.90995
Emilin2	Emilin2	2.31416	1	1	1	5.1028	2.13621	1.43805	2.74634	1.90976
Gm38250	Gm38250	2.31416	1	1	1	5.1028	2.13621	1.43805	2.74634	1.90976
Ppip5k2	Ppip5k2	31.2257	41.5967	67.608	100.05	72.7991	95.3051	46.8101	89.3846	1.90951
Mamld1	Mamld1	1	1	5.82667	6.12326	1	7.81724	2.60889	4.98017	1.90892
Atp2c2	Atp2c2	3.62832	24.5033	11.6187	21.4931	31.771	22.5879	13.2501	25.284	1.90821
Zbed3	Zbed3	2.31416	6.34167	2.93067	7.83102	3.0514	11.2259	3.86217	7.36942	1.90811
Chd5	Chd5	1	2.06833	1.96533	1	3.0514	5.54482	1.67789	3.19874	1.90641
Kctd11	Kctd11	6.25665	14.8883	20.3067	21.4931	34.8481	22.5879	13.8172	26.3097	1.90412
Efnb3	Efnb3	1	2.06833	2.93067	6.12326	2.0257	3.27241	1.99967	3.80713	1.90388
Pdxk	Pdxk	23.3408	19.1617	28.0293	56.502	35.8738	41.9034	23.5106	44.7598	1.90381
BC117090	BC117090	1	4.205	1	1.85388	1	8.95344	2.06833	3.93577	1.90287
Tigd5	Tigd5	3.62832	2.06833	3.896	12.9543	2.0257	3.27241	3.19755	6.08413	1.90275
Gm31373	Gm31373	1	1	1.96533	1	1	5.54482	1.32178	2.51494	1.9027
AC124414.1	AC124414.1	2.31416	3.13667	1	3.56163	2.0257	6.68103	2.15028	4.08945	1.90183
Gm7638	Gm7638	1	4.205	2.93067	3.56163	4.0771	7.81724	2.71189	5.15199	1.89978
Gm46436	Gm46436	6.25665	5.27333	2.93067	11.2465	6.12851	10.0896	4.82022	9.15489	1.89927
Gm37696	Gm37696	1	2.06833	1	3.56163	2.0257	2.13621	1.35611	2.57451	1.89845
Mdfic	Mdfic	10.1991	3.13667	8.72267	8.68489	17.4112	15.7707	7.35282	13.9556	1.89799
Prss27	Prss27	4.94249	4.205	1.96533	2.70775	7.15421	11.2259	3.70427	7.02927	1.89761
CT025556.1	CT025556.1	11.5133	10.615	9.688	14.662	27.6682	18.0431	10.6054	20.1245	1.89756
Gm7496	Gm7496	6.25665	3.13667	2.93067	6.12326	7.15421	10.0896	4.10799	7.78904	1.89607
Hip1	Hip1	11.5133	6.34167	4.86134	11.2465	19.4626	12.3621	7.5721	14.3571	1.89605
Cnn3	Cnn3	3.62832	22.3667	19.3413	14.662	32.7967	38.4948	15.1121	28.6512	1.89591
Rasgrp1	Rasgrp1	29.9116	31.9817	87.88	123.104	88.1846	72.581	49.9244	94.6233	1.89533
Clstn3	Clstn3	3.62832	3.13667	1.96533	2.70775	7.15421	6.68103	2.91011	5.51433	1.89489
Gm12870	Gm12870	2.31416	1	1.96533	3.56163	2.0257	4.40862	1.75983	3.33198	1.89335
Rph3al	Rph3al	2.31416	1	1.96533	3.56163	2.0257	4.40862	1.75983	3.33198	1.89335
Cdc14a	Cdc14a	7.57081	18.0933	21.272	38.5706	37.9252	12.3621	15.6454	29.6193	1.89317
Gm12263	Gm12263	2.31416	5.27333	4.86134	8.68489	8.17991	6.68103	4.14961	7.84861	1.89141
4930520O04Rik	4930520O04Rik	2.31416	3.13667	4.86134	12.9543	1	5.54482	3.43739	6.4997	1.89088
Gm15344	Gm15344	1	3.13667	3.896	2.70775	9.20561	3.27241	2.67756	5.06193	1.8905
Avl9	Avl9	31.2257	52.28	65.6774	114.566	90.236	77.1258	49.7277	93.9758	1.88981
E230013L22Rik	E230013L22Rik	2.31416	2.06833	1	2.70775	3.0514	4.40862	1.79417	3.38926	1.88904
Peg13	Peg13	3.62832	7.41	3.896	12.1004	7.15421	8.95344	4.97811	9.40268	1.88881
Yjefn3	Yjefn3	3.62832	1	1.96533	6.12326	3.0514	3.27241	2.19789	4.14903	1.88773
Utp18	Utp18	87.7347	84.33	176.691	234.108	206.14	218.015	116.252	219.421	1.88747
Hps5	Hps5	40.4249	73.6467	80.1574	122.251	127.161	116.893	64.743	122.102	1.88594
Serpinb13	Serpinb13	15.4558	12.7517	11.6187	21.4931	28.6939	24.8603	13.2754	25.0158	1.88437
Gm15798	Gm15798	2.31416	1	1	1	6.12851	1	1.43805	2.7095	1.88414
Ppp2r2b	Ppp2r2b	2.31416	1	1	1	6.12851	1	1.43805	2.7095	1.88414
Slc12a5	Slc12a5	2.31416	1	1.96533	2.70775	5.1028	2.13621	1.75983	3.31559	1.88404
AC164302.1	AC164302.1	7.57081	4.205	2.93067	9.53877	9.20561	8.95344	4.90216	9.23261	1.88338
Arid3b	Arid3b	2.31416	1	1	6.12326	1	1	1.43805	2.70775	1.88293
Zfp862-ps	Zfp862-ps	2.31416	2.06833	6.792	10.3926	5.1028	5.54482	3.72483	7.01343	1.88288
AC129217.1	AC129217.1	2.31416	1	1	2.70775	1	4.40862	1.43805	2.70546	1.88133
Esam	Esam	1	3.13667	2.93067	3.56163	3.0514	6.68103	2.35578	4.43135	1.88106
1700060J05Rik	1700060J05Rik	2.31416	2.06833	1.96533	3.56163	5.1028	3.27241	2.11594	3.97895	1.88046
Flt1	Flt1	4.94249	5.27333	1	7.83102	2.0257	11.2259	3.73861	7.02752	1.87972
Sprr2a3	Sprr2a3	2.31416	28.7767	5.82667	1	7.15421	61.2189	12.3058	23.1244	1.87914
Gm15601	Gm15601	2.31416	1	3.896	5.26939	6.12851	2.13621	2.40339	4.51137	1.87709
Ttc12	Ttc12	1	3.13667	3.896	2.70775	10.2313	2.13621	2.67756	5.02509	1.87675
Gm29591	Gm29591	1	1	1.96533	4.41551	2.0257	1	1.32178	2.4804	1.87657
Henmt1	Henmt1	1	1	1.96533	4.41551	2.0257	1	1.32178	2.4804	1.87657
Kbtbd7	Kbtbd7	10.1991	9.54667	15.48	17.2237	19.4626	29.4052	11.7419	22.0305	1.87622
Chac1	Chac1	2.31416	1	2.93067	3.56163	7.15421	1	2.08161	3.90528	1.87609
Cdyl	Cdyl	14.1416	19.1617	31.8907	32.5935	30.7453	58.9465	21.7313	40.7618	1.87571
9330175E14Rik	9330175E14Rik	1	3.13667	3.896	4.41551	5.1028	5.54482	2.67756	5.02105	1.87523
Gm5809	Gm5809	2.31416	4.205	1	3.56163	6.12851	4.40862	2.50639	4.69959	1.87504
A730035I17Rik	A730035I17Rik	1	1	1.96533	1	2.0257	4.40862	1.32178	2.47811	1.87483
Gm9379	Gm9379	1	1	1.96533	1	2.0257	4.40862	1.32178	2.47811	1.87483
Xrra1	Xrra1	3.62832	4.205	2.93067	6.12326	5.1028	8.95344	3.588	6.7265	1.87472
Rras2	Rras2	10.1991	23.435	17.4107	30.8857	29.7196	35.0862	17.0149	31.8972	1.87466
Hoxaas2	Hoxaas2	1	7.41	1.96533	3.56163	9.20561	6.68103	3.45844	6.48276	1.87447
Agl	Agl	14.1416	17.025	13.5493	19.7853	36.8995	27.1327	14.9053	27.9392	1.87444
AC154636.3	AC154636.3	2.31416	1	2.93067	5.26939	2.0257	4.40862	2.08161	3.90123	1.87414
Kbtbd6	Kbtbd6	2.31416	1	6.792	9.53877	6.12851	3.27241	3.36872	6.31323	1.87407
Ankrd44	Ankrd44	12.8275	13.82	10.6533	25.7624	31.771	12.3621	12.4336	23.2985	1.87383
Gm5414	Gm5414	2.31416	2.06833	2.93067	6.12326	2.0257	5.54482	2.43772	4.5646	1.87248
Gm10059	Gm10059	2.31416	1	1.96533	3.56163	3.0514	3.27241	1.75983	3.29515	1.87242
Wnk3	Wnk3	3.62832	1	1.96533	1	9.20561	2.13621	2.19789	4.11394	1.87177
Gm650	Gm650	1	2.06833	1	3.56163	3.0514	1	1.35611	2.53768	1.87129
Gm17024	Gm17024	20.7124	26.64	41.544	50.5249	62.5421	53.2655	29.6322	55.4441	1.87108
Gm37655	Gm37655	3.62832	1	1.96533	6.12326	4.0771	2.13621	2.19789	4.11219	1.87098
Gm42467	Gm42467	7.57081	9.54667	3.896	14.662	12.2827	12.3621	7.00449	13.1023	1.87055
Cand1	Cand1	96.9339	134.542	279.981	312.665	316.916	327.091	170.486	318.891	1.87048
Gm21844	Gm21844	2.31416	1	1	1.85388	4.0771	2.13621	1.43805	2.68906	1.86993
Gm33195	Gm33195	2.31416	1	1	1.85388	4.0771	2.13621	1.43805	2.68906	1.86993
Gm5106	Gm5106	1	3.13667	1	4.41551	3.0514	2.13621	1.71222	3.20104	1.86952
Gp1bb	Gp1bb	2.31416	3.13667	4.86134	12.9543	3.0514	3.27241	3.43739	6.42603	1.86945
4931406C07Rik	4931406C07Rik	2.31416	4.205	11.6187	12.1004	7.15421	14.6345	6.04594	11.2964	1.86842
Gm6576	Gm6576	3.62832	6.34167	10.6533	9.53877	14.3341	14.6345	6.87444	12.8358	1.86717
Gm37137	Gm37137	3.62832	4.205	2.93067	4.41551	11.257	4.40862	3.588	6.69371	1.86558
Gm14117	Gm14117	2.31416	2.06833	1.96533	3.56163	6.12851	2.13621	2.11594	3.94211	1.86305
Prrg1	Prrg1	1	3.13667	1.96533	1.85388	5.1028	4.40862	2.034	3.78843	1.86255
Mtrf1l	Mtrf1l	10.1991	10.615	9.688	22.3469	16.3855	18.0431	10.1674	18.9252	1.86136
Eda	Eda	4.94249	12.7517	51.1974	38.5706	52.2851	37.3586	22.9638	42.7381	1.8611
Crebzf	Crebzf	18.0841	12.7517	15.48	33.4473	25.6168	27.1327	15.4386	28.7323	1.86107
Smim6	Smim6	2.31416	4.205	2.93067	11.2465	3.0514	3.27241	3.14994	5.85678	1.85933
Gm11714	Gm11714	1	4.205	1	1	6.12851	4.40862	2.06833	3.84571	1.85933
Gm23935	Gm23935	3.62832	4.205	1	4.41551	3.0514	8.95344	2.94444	5.47345	1.85891
Kifc2	Kifc2	6.25665	8.47833	9.688	8.68489	16.3855	20.3155	8.141	15.1286	1.85833
Cep131	Cep131	1	9.54667	9.688	12.9543	12.2827	12.3621	6.74489	12.533	1.85815
Tns2	Tns2	18.0841	18.0933	10.6533	40.2783	28.6939	18.0431	15.6103	29.0051	1.85808
Gpr21	Gpr21	2.31416	3.13667	1	4.41551	2.0257	5.54482	2.15028	3.99534	1.85806
Tomm6	Tomm6	3.62832	1	1	5.26939	3.0514	2.13621	1.87611	3.48566	1.85792
Nupr1l	Nupr1l	2.31416	2.06833	2.93067	6.12326	3.0514	4.40862	2.43772	4.52776	1.85737
Pign	Pign	23.3408	22.3667	29.96	58.2098	35.8738	46.4482	25.2225	46.8439	1.85723
2310058D17Rik	2310058D17Rik	2.31416	2.06833	1	3.56163	2.0257	4.40862	1.79417	3.33198	1.85712
Gm6793	Gm6793	2.31416	2.06833	2.93067	2.70775	3.0514	7.81724	2.43772	4.52546	1.85643
Il15	Il15	1	2.06833	1	4.41551	1	2.13621	1.35611	2.51724	1.85622
Guca1a	Guca1a	2.31416	1	1	2.70775	2.0257	3.27241	1.43805	2.66862	1.85572
Hnrnpa1l2-ps2	Hnrnpa1l2-ps2	2.31416	1	2.93067	1.85388	3.0514	6.68103	2.08161	3.8621	1.85534
Gm28047	Gm28047	1	2.06833	1	1	1	5.54482	1.35611	2.51494	1.85452
Gm38231	Gm38231	1	2.06833	1	1	1	5.54482	1.35611	2.51494	1.85452
Gm5385	Gm5385	1	2.06833	1	1	1	5.54482	1.35611	2.51494	1.85452
Tvp23a	Tvp23a	1	1	4.86134	1.85388	3.0514	7.81724	2.28711	4.24084	1.85423
Csgalnact2	Csgalnact2	18.0841	27.7083	55.0587	83.8261	53.3108	49.8569	33.617	62.3312	1.85416
0610025J13Rik	0610025J13Rik	1	1	1	3.56163	1	1	1	1.85388	1.85388
AC121598.2	AC121598.2	1	1	1	3.56163	1	1	1	1.85388	1.85388
AC154328.1	AC154328.1	1	1	1	3.56163	1	1	1	1.85388	1.85388
AC159205.2	AC159205.2	1	1	1	3.56163	1	1	1	1.85388	1.85388
Cdh11	Cdh11	1	1	1	3.56163	1	1	1	1.85388	1.85388
Clec10a	Clec10a	1	1	1	3.56163	1	1	1	1.85388	1.85388
Cngb1	Cngb1	1	1	1	3.56163	1	1	1	1.85388	1.85388
Col9a1	Col9a1	1	1	1	3.56163	1	1	1	1.85388	1.85388
Dact3	Dact3	1	1	1	3.56163	1	1	1	1.85388	1.85388
Flg	Flg	1	1	1	3.56163	1	1	1	1.85388	1.85388
Flnc	Flnc	1	1	1	3.56163	1	1	1	1.85388	1.85388
Gm10797	Gm10797	1	1	1	3.56163	1	1	1	1.85388	1.85388
Gm12934	Gm12934	1	1	1	3.56163	1	1	1	1.85388	1.85388
Gm15838	Gm15838	1	1	1	3.56163	1	1	1	1.85388	1.85388
Gm18186	Gm18186	1	1	1	3.56163	1	1	1	1.85388	1.85388
Gm18537	Gm18537	1	1	1	3.56163	1	1	1	1.85388	1.85388
Gm18755	Gm18755	1	1	1	3.56163	1	1	1	1.85388	1.85388
Gm18956	Gm18956	1	1	1	3.56163	1	1	1	1.85388	1.85388
Gm24840	Gm24840	1	1	1	3.56163	1	1	1	1.85388	1.85388
Gm25411	Gm25411	1	1	1	3.56163	1	1	1	1.85388	1.85388
Gm25596	Gm25596	1	1	1	3.56163	1	1	1	1.85388	1.85388
Gm25617	Gm25617	1	1	1	3.56163	1	1	1	1.85388	1.85388
Gm37313	Gm37313	1	1	1	3.56163	1	1	1	1.85388	1.85388
Gm38056	Gm38056	1	1	1	3.56163	1	1	1	1.85388	1.85388
Gm43760	Gm43760	1	1	1	3.56163	1	1	1	1.85388	1.85388
Gm45075	Gm45075	1	1	1	3.56163	1	1	1	1.85388	1.85388
Gm45799	Gm45799	1	1	1	3.56163	1	1	1	1.85388	1.85388
Gm6116	Gm6116	1	1	1	3.56163	1	1	1	1.85388	1.85388
Inpp5d	Inpp5d	1	1	1	3.56163	1	1	1	1.85388	1.85388
Iqcd	Iqcd	1	1	1	3.56163	1	1	1	1.85388	1.85388
Irgc1	Irgc1	1	1	1	3.56163	1	1	1	1.85388	1.85388
Mir1938	Mir1938	1	1	1	3.56163	1	1	1	1.85388	1.85388
Mir697	Mir697	1	1	1	3.56163	1	1	1	1.85388	1.85388
Npy	Npy	1	1	1	3.56163	1	1	1	1.85388	1.85388
Otud6a	Otud6a	1	1	1	3.56163	1	1	1	1.85388	1.85388
Prss52	Prss52	1	1	1	3.56163	1	1	1	1.85388	1.85388
Psma8	Psma8	1	1	1	3.56163	1	1	1	1.85388	1.85388
Rai2	Rai2	1	1	1	3.56163	1	1	1	1.85388	1.85388
Snord89	Snord89	1	1	1	3.56163	1	1	1	1.85388	1.85388
Spata48	Spata48	1	1	1	3.56163	1	1	1	1.85388	1.85388
Syndig1l	Syndig1l	1	1	1	3.56163	1	1	1	1.85388	1.85388
Tex13c1	Tex13c1	1	1	1	3.56163	1	1	1	1.85388	1.85388
Th	Th	1	1	1	3.56163	1	1	1	1.85388	1.85388
Trim17	Trim17	1	1	1	3.56163	1	1	1	1.85388	1.85388
Zbtb8b	Zbtb8b	1	1	1	3.56163	1	1	1	1.85388	1.85388
Gm17259	Gm17259	4.94249	3.13667	1.96533	2.70775	9.20561	6.68103	3.34816	6.19813	1.8512
Lsm14b	Lsm14b	3.62832	5.27333	1	8.68489	4.0771	5.54482	3.30055	6.10227	1.84886
Uprt	Uprt	14.1416	4.205	6.792	24.9086	9.20561	12.3621	8.37954	15.4921	1.8488
Cables1	Cables1	11.5133	7.41	9.688	24.0547	5.1028	23.7241	9.5371	17.6272	1.84828
Ankle2	Ankle2	23.3408	49.075	61.816	94.9265	86.1332	66.8999	44.7439	82.6532	1.84725
Gm10767	Gm10767	6.25665	2.06833	1	4.41551	6.12851	6.68103	3.10833	5.74168	1.84719
Zfp729b	Zfp729b	6.25665	10.615	3.896	15.5159	18.4369	4.40862	6.92255	12.7871	1.84717
Adam4	Adam4	1	1	1.96533	1	3.0514	3.27241	1.32178	2.44127	1.84696
Fam13c	Fam13c	1	1	1.96533	1	3.0514	3.27241	1.32178	2.44127	1.84696
Gm7370	Gm7370	1	1	1.96533	1	3.0514	3.27241	1.32178	2.44127	1.84696
Adhfe1	Adhfe1	1	3.13667	1	1	4.0771	4.40862	1.71222	3.16191	1.84667
AC132317.1	AC132317.1	2.31416	1	2.93067	6.12326	1	4.40862	2.08161	3.84396	1.84663
Dennd1c	Dennd1c	1	6.34167	3.896	7.83102	5.1028	7.81724	3.74589	6.91702	1.84656
Gm44130	Gm44130	6.25665	3.13667	4.86134	7.83102	6.12851	12.3621	4.75155	8.77386	1.84653
Fam185a	Fam185a	14.1416	8.47833	10.6533	10.3926	20.4883	30.5414	11.0911	20.4741	1.84599
Fhl3	Fhl3	8.88497	4.205	8.72267	12.1004	11.257	16.9069	7.27088	13.4214	1.84592
Abca4	Abca4	10.1991	14.8883	17.4107	34.3012	31.771	12.3621	14.166	26.1448	1.84559
Gm12758	Gm12758	1	8.47833	3.896	8.68489	8.17991	7.81724	4.45811	8.22735	1.84548
Card6	Card6	2.31416	1	1	1.85388	5.1028	1	1.43805	2.65223	1.84432
Mir23a	Mir23a	2.31416	1	1	1.85388	5.1028	1	1.43805	2.65223	1.84432
Tbc1d30	Tbc1d30	1	1	2.93067	1.85388	5.1028	2.13621	1.64356	3.03096	1.84415
Rptoros	Rptoros	1	4.205	3.896	9.53877	5.1028	2.13621	3.03367	5.59259	1.84351
AC120347.2	AC120347.2	2.31416	6.34167	6.792	4.41551	7.15421	16.9069	5.14928	9.4922	1.8434
Wdhd1	Wdhd1	3.62832	14.8883	42.5094	57.3559	24.5911	30.5414	20.342	37.4961	1.84329
Actn1	Actn1	4.94249	12.7517	17.4107	23.2008	14.3341	27.1327	11.7016	21.5559	1.84213
Fam20a	Fam20a	4.94249	8.47833	3.896	7.83102	7.15421	16.9069	5.77227	10.6307	1.84168
Fst	Fst	85.1064	35.1867	40.5787	73.5796	72.7991	149.843	53.6239	98.7405	1.84135
Zfp941	Zfp941	4.94249	6.34167	1	1.85388	6.12851	14.6345	4.09472	7.53895	1.84114
Gm11645	Gm11645	2.31416	3.13667	1	4.41551	3.0514	4.40862	2.15028	3.95851	1.84093
AC131709.1	AC131709.1	1	1	3.896	4.41551	2.0257	4.40862	1.96533	3.61661	1.8402
Jpx	Jpx	2.31416	5.27333	1.96533	6.12326	8.17991	3.27241	3.18428	5.85853	1.83983
Zfp335os	Zfp335os	1	2.06833	1.96533	6.12326	1	2.13621	1.67789	3.08649	1.83951
2610020C07Rik	2610020C07Rik	3.62832	6.34167	4.86134	5.26939	5.1028	16.9069	4.94378	9.09302	1.83929
Efnb1	Efnb1	50.9382	43.7333	54.0934	87.2416	95.3645	90.7603	49.5883	91.1221	1.83757
Gm9354	Gm9354	4.94249	3.13667	2.93067	6.97714	2.0257	11.2259	3.66994	6.7429	1.83733
Gm14382	Gm14382	1	2.06833	2.93067	3.56163	3.0514	4.40862	1.99967	3.67388	1.83725
Mtmr6	Mtmr6	50.9382	166.592	186.344	212.762	275.888	253.238	134.625	247.296	1.83693
A130014A01Rik	A130014A01Rik	4.94249	5.27333	4.86134	14.662	4.0771	8.95344	5.02572	9.23086	1.83672
Chic1	Chic1	2.31416	1	3.896	7.83102	1	4.40862	2.40339	4.41321	1.83625
Ccny	Ccny	48.3098	65.1	131.32	187.145	140.495	121.438	81.5766	149.693	1.835
AC116487.1	AC116487.1	4.94249	3.13667	1	2.70775	6.12851	7.81724	3.02638	5.55117	1.83426
Gm17937	Gm17937	1	1	1.96533	5.26939	1	1	1.32178	2.42313	1.83323
Tmem47	Tmem47	1	1	1.96533	5.26939	1	1	1.32178	2.42313	1.83323
Prickle1	Prickle1	12.8275	5.27333	3.896	21.4931	3.0514	15.7707	7.33227	13.4384	1.83277
AC175538.1	AC175538.1	1	4.205	1	5.26939	5.1028	1	2.06833	3.79073	1.83275
Lif	Lif	1	5.27333	8.72267	9.53877	11.257	6.68103	4.99867	9.15894	1.83228
6720427I07Rik	6720427I07Rik	15.4558	18.0933	21.272	30.0318	30.7453	39.631	18.2737	33.4694	1.83156
Glipr1	Glipr1	1	1	1.96533	1.85388	1	4.40862	1.32178	2.42083	1.8315
Gm11831	Gm11831	1	1	1.96533	1.85388	1	4.40862	1.32178	2.42083	1.8315
Gm42987	Gm42987	1	1	1.96533	1.85388	1	4.40862	1.32178	2.42083	1.8315
Fam13a	Fam13a	1	1	4.86134	1	7.15421	4.40862	2.28711	4.18761	1.83096
Pcdhgb4	Pcdhgb4	1	2.06833	1	4.41551	2.0257	1	1.35611	2.4804	1.82906
Gm26583	Gm26583	3.62832	3.13667	4.86134	10.3926	3.0514	7.81724	3.87544	7.0871	1.82872
Gm10293	Gm10293	1	2.06833	1.96533	1.85388	4.0771	3.27241	1.67789	3.0678	1.82837
A230083N12Rik	A230083N12Rik	1	2.06833	1	1	2.0257	4.40862	1.35611	2.47811	1.82736
Gm12271	Gm12271	1	2.06833	1	1	2.0257	4.40862	1.35611	2.47811	1.82736
Gm25657	Gm25657	1	2.06833	1	1	2.0257	4.40862	1.35611	2.47811	1.82736
Itgam	Itgam	1	2.06833	1	1	2.0257	4.40862	1.35611	2.47811	1.82736
Zmiz1os1	Zmiz1os1	1	2.06833	1	1	2.0257	4.40862	1.35611	2.47811	1.82736
Dnali1	Dnali1	4.94249	1	2.93067	2.70775	10.2313	3.27241	2.95772	5.40383	1.82703
Acy3	Acy3	3.62832	2.06833	3.896	6.97714	6.12851	4.40862	3.19755	5.83809	1.8258
Gm25047	Gm25047	3.62832	2.06833	1	2.70775	5.1028	4.40862	2.23222	4.07306	1.82467
Gm15787	Gm15787	3.62832	3.13667	4.86134	9.53877	6.12851	5.54482	3.87544	7.0707	1.82449
1110065P20Rik	1110065P20Rik	1	3.13667	13.5493	7.83102	14.3341	10.0896	5.89534	10.7516	1.82375
Ppm1f	Ppm1f	12.8275	33.05	47.336	76.1412	45.1052	48.7207	31.0712	56.6557	1.82342
Fancm	Fancm	40.4249	25.5717	28.9947	71.0179	31.771	70.3086	31.6637	57.6992	1.82225
Klhl11	Klhl11	53.5665	67.2367	64.712	137.62	100.493	99.8499	61.8384	112.654	1.82176
Olfm1	Olfm1	1	1	2.93067	1.85388	6.12851	1	1.64356	2.99413	1.82174
Kmt5b	Kmt5b	56.1948	62.9633	76.296	128.228	130.238	97.5775	65.1514	118.681	1.82162
Sulf2	Sulf2	6.25665	7.41	7.75734	8.68489	12.2827	18.0431	7.14133	13.0036	1.82089
Osbpl11	Osbpl11	18.0841	51.2117	87.88	106.881	106.647	72.581	52.3919	95.3697	1.82031
Gm38236	Gm38236	2.31416	3.13667	5.82667	4.41551	7.15421	8.95344	3.75917	6.84105	1.81983
Alg10b	Alg10b	12.8275	22.3667	33.8214	43.6939	39.9766	41.9034	23.0052	41.858	1.8195
AC107711.4	AC107711.4	1	1	1.96533	1	4.0771	2.13621	1.32178	2.40444	1.81909
CU062626.1	CU062626.1	1	1	1.96533	1	4.0771	2.13621	1.32178	2.40444	1.81909
Gm14861	Gm14861	1	1	1.96533	1	4.0771	2.13621	1.32178	2.40444	1.81909
Gm16044	Gm16044	1	1	1.96533	1	4.0771	2.13621	1.32178	2.40444	1.81909
Gm18015	Gm18015	1	1	1.96533	1	4.0771	2.13621	1.32178	2.40444	1.81909
Tdgf1-ps2	Tdgf1-ps2	2.31416	2.06833	1.96533	4.41551	6.12851	1	2.11594	3.848	1.81858
Rdh5	Rdh5	6.25665	11.6833	9.688	18.0775	16.3855	15.7707	9.20933	16.7446	1.81822
Gm4675	Gm4675	3.62832	1	1	1.85388	5.1028	3.27241	1.87611	3.4097	1.81743
Cercam	Cercam	2.31416	2.06833	1	3.56163	4.0771	2.13621	1.79417	3.25831	1.81606
Gm13986	Gm13986	2.31416	1	1	3.56163	1	3.27241	1.43805	2.61135	1.81589
Gm26841	Gm26841	2.31416	1	1	3.56163	1	3.27241	1.43805	2.61135	1.81589
Gm43180	Gm43180	2.31416	1	1	3.56163	1	3.27241	1.43805	2.61135	1.81589
Gm7463	Gm7463	2.31416	1	1	3.56163	1	3.27241	1.43805	2.61135	1.81589
Vars2	Vars2	11.5133	10.615	16.4453	21.4931	22.5397	25.9965	12.8579	23.3431	1.81547
Tmem136	Tmem136	3.62832	3.13667	1	8.68489	1	4.40862	2.58833	4.69784	1.81501
E230034D01Rik	E230034D01Rik	1	4.205	1.96533	4.41551	3.0514	5.54482	2.39011	4.33725	1.81466
BC030867	BC030867	10.1991	6.34167	5.82667	8.68489	8.17991	23.7241	7.45582	13.5296	1.81464
Carns1	Carns1	1	3.13667	1	5.26939	3.0514	1	1.71222	3.10693	1.81456
Slc22a20	Slc22a20	1	3.13667	1	5.26939	3.0514	1	1.71222	3.10693	1.81456
Vamp1	Vamp1	6.25665	6.34167	6.792	8.68489	16.3855	10.0896	6.46344	11.72	1.81328
Xpo4	Xpo4	11.5133	51.2117	50.232	69.3102	69.722	65.7637	37.6523	68.2653	1.81304
Ampd1	Ampd1	6.25665	12.7517	7.75734	18.0775	11.257	19.1793	8.92188	16.1713	1.81254
Col12a1	Col12a1	77.2214	77.92	98.4987	217.885	105.622	136.209	84.5467	153.238	1.81247
Sec23a	Sec23a	33.8541	145.225	233.645	183.73	297.428	266.872	137.575	249.343	1.81242
Dyrk3	Dyrk3	10.1991	14.8883	5.82667	26.6163	10.2313	19.1793	10.3047	18.6756	1.81234
Ppp3cc	Ppp3cc	6.25665	6.34167	2.93067	6.12326	5.1028	16.9069	5.17633	9.37765	1.81164
Wdtc1	Wdtc1	8.88497	13.82	14.5147	26.6163	10.2313	30.5414	12.4065	22.463	1.81058
Dsc2	Dsc2	24.6549	52.28	73.4	73.5796	86.1332	112.348	50.1117	90.687	1.8097
Gm10564	Gm10564	3.62832	2.06833	1.96533	5.26939	3.0514	5.54482	2.554	4.62187	1.80966
Nrtn	Nrtn	8.88497	5.27333	4.86134	9.53877	10.2313	14.6345	6.33988	11.4682	1.8089
Gm3791	Gm3791	7.57081	9.54667	10.6533	19.7853	11.257	19.1793	9.25694	16.7405	1.80843
Cdk3-ps	Cdk3-ps	3.62832	3.13667	1.96533	3.56163	1	11.2259	2.91011	5.2625	1.80835
Gm43387	Gm43387	1	4.205	1.96533	3.56163	6.12851	3.27241	2.39011	4.32085	1.8078
AC150560.1	AC150560.1	2.31416	1	1.96533	5.26939	1	3.27241	1.75983	3.1806	1.80733
Rhobtb2	Rhobtb2	15.4558	17.025	16.4453	25.7624	28.6939	33.95	16.3087	29.4688	1.80694
Gm7082	Gm7082	1	2.06833	1.96533	1.85388	5.1028	2.13621	1.67789	3.03096	1.80641
Plce1	Plce1	1	2.06833	1.96533	1.85388	5.1028	2.13621	1.67789	3.03096	1.80641
Actr3b	Actr3b	2.31416	2.06833	5.82667	6.97714	8.17991	3.27241	3.40306	6.14315	1.80519
Gm36198	Gm36198	7.57081	4.205	6.792	6.12326	18.4369	8.95344	6.18927	11.1712	1.80493
4930547M16Rik	4930547M16Rik	2.31416	1	1	2.70775	4.0771	1	1.43805	2.59495	1.80449
Klf15	Klf15	3.62832	1	2.93067	1.85388	5.1028	6.68103	2.51966	4.5459	1.80417
Gm18284	Gm18284	4.94249	3.13667	1	6.97714	6.12851	3.27241	3.02638	5.45935	1.80392
Aldh1a1	Aldh1a1	2.31416	2.06833	2.93067	6.97714	4.0771	2.13621	2.43772	4.39682	1.80366
AC154297.1	AC154297.1	1	1	1.96533	1.85388	2.0257	3.27241	1.32178	2.384	1.80363
AL645745.1	AL645745.1	1	1	1.96533	1.85388	2.0257	3.27241	1.32178	2.384	1.80363
Gm24346	Gm24346	1	1	1.96533	1.85388	2.0257	3.27241	1.32178	2.384	1.80363
Pdf	Pdf	1	1	1.96533	1.85388	2.0257	3.27241	1.32178	2.384	1.80363
Gm43597	Gm43597	4.94249	12.7517	1	12.9543	6.12851	14.6345	6.23139	11.2391	1.80363
Fam84b	Fam84b	32.5399	37.3233	55.0587	71.8718	72.7991	80.5344	41.6406	75.0684	1.80277
Vps13c	Vps13c	36.4824	35.1867	36.7174	75.2873	86.1332	33.95	36.1288	65.1235	1.80254
Acot6	Acot6	1	8.47833	7.75734	8.68489	12.2827	10.0896	5.74522	10.3524	1.80192
Kntc1	Kntc1	10.1991	5.27333	9.688	18.0775	9.20561	18.0431	8.38683	15.1087	1.80149
Dsg2	Dsg2	60.1373	45.87	79.192	102.611	100.493	130.527	61.7331	111.211	1.80147
Yrdc	Yrdc	27.2832	7.41	38.648	48.8171	48.1823	35.0862	24.4471	44.0285	1.80097
Wdr38	Wdr38	1	3.13667	4.86134	4.41551	5.1028	6.68103	2.99933	5.39978	1.80033
Gm18867	Gm18867	1	2.06833	1	1	3.0514	3.27241	1.35611	2.44127	1.8002
Gm28940	Gm28940	1	2.06833	1	1	3.0514	3.27241	1.35611	2.44127	1.8002
Gm43545	Gm43545	1	2.06833	1	1	3.0514	3.27241	1.35611	2.44127	1.8002
Dusp2	Dusp2	1	1	11.6187	4.41551	12.2827	7.81724	4.53956	8.17182	1.80014
Gm37447	Gm37447	1	5.27333	5.82667	7.83102	6.12851	7.81724	4.03333	7.25892	1.79973
Dsg1b	Dsg1b	52.2523	96.0817	147.731	155.552	199.986	177.112	98.6883	177.55	1.7991
Gjd3	Gjd3	2.31416	4.205	1	1.85388	6.12851	5.54482	2.50639	4.50907	1.79903
Gm37352	Gm37352	44.3674	31.9817	54.0934	121.397	75.8762	37.3586	43.4808	78.2105	1.79874
Aqp7	Aqp7	1	6.34167	1	5.26939	3.0514	6.68103	2.78056	5.00061	1.79842
Chn2	Chn2	4.94249	4.205	5.82667	9.53877	16.3855	1	4.99139	8.97476	1.79805
Rpl36a-ps4	Rpl36a-ps4	2.31416	1	1.96533	4.41551	4.0771	1	1.75983	3.1642	1.79801
Lrsam1	Lrsam1	16.7699	17.025	22.2373	30.8857	46.1309	23.7241	18.6774	33.5802	1.7979
Gm26536	Gm26536	1	1	2.93067	3.56163	2.0257	3.27241	1.64356	2.95325	1.79687
Arhgef17	Arhgef17	2.31416	2.06833	4.86134	10.3926	4.0771	2.13621	3.08128	5.53532	1.79644
Gm16973	Gm16973	1	9.54667	14.5147	14.662	22.5397	7.81724	8.35378	15.0063	1.79635
Gm5566	Gm5566	2.31416	3.13667	1	1.85388	3.0514	6.68103	2.15028	3.8621	1.7961
Nus1	Nus1	31.2257	34.1183	46.3707	63.333	73.8248	63.4913	37.2383	66.883	1.79608
AC160336.1	AC160336.1	3.62832	1	2.93067	2.70775	3.0514	7.81724	2.51966	4.52546	1.79606
Rnf170	Rnf170	10.1991	20.23	24.168	30.0318	42.028	25.9965	18.1991	32.6855	1.796
Rnf165	Rnf165	2.31416	2.06833	2.93067	7.83102	2.0257	3.27241	2.43772	4.37638	1.79527
Nrp2	Nrp2	14.1416	25.5717	23.2027	39.4245	33.8224	39.631	20.972	37.626	1.79411
Sema3e	Sema3e	3.62832	4.205	12.584	8.68489	13.3084	14.6345	6.80578	12.2093	1.79396
Gm37745	Gm37745	10.1991	8.47833	9.688	19.7853	5.1028	25.9965	9.45516	16.9615	1.79389
Gm5739	Gm5739	6.25665	6.34167	1	6.12326	8.17991	10.0896	4.53277	8.13094	1.79381
Cldn8	Cldn8	3.62832	1	1.96533	3.56163	6.12851	2.13621	2.19789	3.94211	1.79359
Klk13	Klk13	1	5.27333	2.93067	6.97714	5.1028	4.40862	3.068	5.49619	1.79146
Gm17530	Gm17530	2.31416	2.06833	1.96533	1.85388	5.1028	4.40862	2.11594	3.78843	1.79042
Zfp689	Zfp689	6.25665	3.13667	4.86134	7.83102	3.0514	14.6345	4.75155	8.50563	1.79007
Gm26890	Gm26890	3.62832	1	2.93067	1.85388	6.12851	5.54482	2.51966	4.50907	1.78955
Fam229b	Fam229b	2.31416	4.205	1.96533	4.41551	4.0771	6.68103	2.82817	5.05788	1.7884
Gm26609	Gm26609	3.62832	1	1	2.70775	4.0771	3.27241	1.87611	3.35242	1.7869
Gm18705	Gm18705	1	1	2.93067	2.70775	5.1028	1	1.64356	2.93685	1.78689
Aox2	Aox2	1	2.06833	1	5.26939	1	1	1.35611	2.42313	1.78682
Creb3l4	Creb3l4	3.62832	2.06833	2.93067	6.12326	7.15421	2.13621	2.87578	5.13789	1.78661
Shc4	Shc4	1	1	5.82667	8.68489	2.0257	3.27241	2.60889	4.661	1.78658
Grid2ip	Grid2ip	2.31416	1	1.96533	5.26939	2.0257	2.13621	1.75983	3.14376	1.7864
P3h3	P3h3	1	3.13667	2.93067	5.26939	4.0771	3.27241	2.35578	4.2063	1.78552
Ttbk1	Ttbk1	1	2.06833	1	1.85388	1	4.40862	1.35611	2.42083	1.78513
Cmas	Cmas	6.25665	13.82	9.688	10.3926	13.3084	29.4052	9.92155	17.7021	1.7842
Kif14	Kif14	15.4558	4.205	11.6187	12.9543	12.2827	30.5414	10.4265	18.5928	1.78323
Fance	Fance	10.1991	41.5967	54.0934	81.2644	46.1309	61.2189	35.2964	62.8714	1.78124
Ankrd24	Ankrd24	7.57081	9.54667	9.688	14.662	18.4369	14.6345	8.93516	15.9111	1.78073
Zdhhc17	Zdhhc17	4.94249	7.41	10.6533	20.6392	10.2313	10.0896	7.66861	13.6534	1.78042
Trp53rkb	Trp53rkb	6.25665	5.27333	1	8.68489	9.20561	4.40862	4.17666	7.43304	1.77966
Unk	Unk	8.88497	29.845	20.3067	36.009	32.7967	36.2224	19.6789	35.0094	1.77903
Alkbh5	Alkbh5	146.872	193.3	370.723	404.884	456.411	403.217	236.965	421.504	1.77876
Btg3	Btg3	3.62832	8.47833	11.6187	17.2237	9.20561	15.7707	7.90844	14.0667	1.77869
Tpd52-ps	Tpd52-ps	11.5133	11.6833	14.5147	19.7853	23.5654	23.7241	12.5704	22.3583	1.77864
Blnk	Blnk	6.25665	10.615	8.72267	6.97714	20.4883	18.0431	8.53144	15.1695	1.77807
Il4ra	Il4ra	82.4781	108.902	146.765	201.661	186.652	212.334	112.715	200.216	1.7763
AC153729.1	AC153729.1	1	1	1.96533	1.85388	3.0514	2.13621	1.32178	2.34716	1.77576
Gm12251	Gm12251	1	1	1.96533	1.85388	3.0514	2.13621	1.32178	2.34716	1.77576
Gm16246	Gm16246	1	1	1.96533	1.85388	3.0514	2.13621	1.32178	2.34716	1.77576
Gm18256	Gm18256	1	1	1.96533	1.85388	3.0514	2.13621	1.32178	2.34716	1.77576
Ccdc106	Ccdc106	1	1	2.93067	3.56163	3.0514	2.13621	1.64356	2.91641	1.77445
Gm3635	Gm3635	1	1	2.93067	3.56163	3.0514	2.13621	1.64356	2.91641	1.77445
Gpbar1	Gpbar1	7.57081	6.34167	6.792	10.3926	7.15421	19.1793	6.90149	12.2421	1.77383
Pfkfb1	Pfkfb1	1	5.27333	1	4.41551	4.0771	4.40862	2.42444	4.30041	1.77377
Gm42548	Gm42548	22.0266	18.0933	8.72267	38.5706	16.3855	31.6776	16.2809	28.8779	1.77373
Relt	Relt	12.8275	7.41	9.688	28.3241	11.257	13.4983	9.97516	17.6931	1.77372
Gm13409	Gm13409	1	2.06833	1	1	4.0771	2.13621	1.35611	2.40444	1.77304
Gm4887	Gm4887	1	2.06833	1	1	4.0771	2.13621	1.35611	2.40444	1.77304
Gm8177	Gm8177	1	2.06833	1	1	4.0771	2.13621	1.35611	2.40444	1.77304
Kit	Kit	1	2.06833	1	1	4.0771	2.13621	1.35611	2.40444	1.77304
AC156163.1	AC156163.1	2.31416	6.34167	1.96533	6.12326	7.15421	5.54482	3.54039	6.2741	1.77215
Cebpd	Cebpd	8.88497	15.9567	8.72267	14.662	25.6168	19.1793	11.1881	19.8194	1.77147
Nynrin	Nynrin	2.31416	7.41	5.82667	17.2237	8.17991	2.13621	5.18361	9.17993	1.77095
Braf	Braf	41.739	50.1433	76.296	85.5338	105.622	106.667	56.0595	99.2742	1.77087
Gm12335	Gm12335	2.31416	3.13667	1	6.12326	2.0257	3.27241	2.15028	3.80713	1.77053
Sumf1	Sumf1	16.7699	17.025	28.9947	33.4473	47.1566	30.5414	20.9299	37.0484	1.77012
Tead3	Tead3	8.88497	22.3667	12.584	22.3469	23.5654	31.6776	14.6119	25.8633	1.77002
Kcnd1	Kcnd1	1	3.13667	1.96533	3.56163	5.1028	2.13621	2.034	3.60021	1.77002
Fam160b2	Fam160b2	31.2257	25.5717	40.5787	54.7943	67.6706	49.8569	32.4587	57.4406	1.76965
Rffl	Rffl	29.9116	86.4667	71.4694	116.273	101.519	114.621	62.6159	110.804	1.76959
Prex1	Prex1	32.5399	18.0933	31.8907	73.5796	32.7967	39.631	27.508	48.6691	1.76927
4930438A08Rik	4930438A08Rik	6.25665	4.205	5.82667	7.83102	4.0771	16.9069	5.42944	9.605	1.76906
Zfp28	Zfp28	6.25665	5.27333	2.93067	6.97714	5.1028	13.4983	4.82022	8.52607	1.76881
Gm9200	Gm9200	2.31416	4.205	2.93067	1.85388	8.17991	6.68103	3.14994	5.57161	1.7688
Gm46355	Gm46355	2.31416	5.27333	1	2.70775	9.20561	3.27241	2.8625	5.06193	1.76836
Nudt11	Nudt11	4.94249	12.7517	17.4107	16.3698	17.4112	28.2689	11.7016	20.6833	1.76756
Gm37470	Gm37470	3.62832	1	1.96533	4.41551	5.1028	2.13621	2.19789	3.88484	1.76753
Gm42435	Gm42435	4.94249	1	1	3.56163	2.0257	6.68103	2.31416	4.08945	1.76714
LMLN2	LMLN2	4.94249	1	1	3.56163	2.0257	6.68103	2.31416	4.08945	1.76714
Hmgcs2	Hmgcs2	7.57081	23.435	22.2373	24.0547	45.1052	24.8603	17.7477	31.3401	1.76586
Slc41a2	Slc41a2	1	4.205	1	1	1	8.95344	2.06833	3.65115	1.76526
1810034E14Rik	1810034E14Rik	2.31416	1	2.93067	3.56163	3.0514	4.40862	2.08161	3.67388	1.76492
Phf6	Phf6	29.9116	36.255	111.048	101.758	86.1332	124.846	59.0715	104.246	1.76474
Sgcd	Sgcd	2.31416	2.06833	3.896	6.12326	4.0771	4.40862	2.7595	4.86966	1.76469
Gm15506	Gm15506	2.31416	1	1	3.56163	3.0514	1	1.43805	2.53768	1.76466
Mapk15	Mapk15	2.31416	1	1	3.56163	3.0514	1	1.43805	2.53768	1.76466
Zfp647	Zfp647	3.62832	2.06833	1	5.26939	1	5.54482	2.23222	3.93807	1.76419
Fam111a	Fam111a	14.1416	13.82	17.4107	30.0318	19.4626	30.5414	15.1241	26.6786	1.76398
Gm9938	Gm9938	4.94249	5.27333	1	12.1004	1	6.68103	3.73861	6.59381	1.76371
1700007J10Rik	1700007J10Rik	3.62832	7.41	3.896	11.2465	6.12851	8.95344	4.97811	8.77616	1.76295
8430422M14Rik	8430422M14Rik	1	2.06833	3.896	6.97714	2.0257	3.27241	2.32144	4.09175	1.76259
4921522P10Rik	4921522P10Rik	2.31416	4.205	2.93067	2.70775	6.12851	7.81724	3.14994	5.55117	1.76231
Tob1	Tob1	75.9073	109.97	188.275	285.341	197.935	175.976	124.717	219.75	1.76199
Slc19a3	Slc19a3	1	1	2.93067	1	1	6.68103	1.64356	2.89368	1.76062
Slc39a4	Slc39a4	1	1	2.93067	1	1	6.68103	1.64356	2.89368	1.76062
AC164437.5	AC164437.5	1	1	1.96533	2.70775	1	3.27241	1.32178	2.32672	1.7603
Gm15770	Gm15770	1	1	1.96533	2.70775	1	3.27241	1.32178	2.32672	1.7603
Gm32899	Gm32899	1	1	1.96533	2.70775	1	3.27241	1.32178	2.32672	1.7603
Obox8	Obox8	1	1	1.96533	2.70775	1	3.27241	1.32178	2.32672	1.7603
Slfn10-ps	Slfn10-ps	1	1	1.96533	2.70775	1	3.27241	1.32178	2.32672	1.7603
Acot11	Acot11	1	2.06833	1.96533	3.56163	2.0257	3.27241	1.67789	2.95325	1.7601
Hmgb1-rs16	Hmgb1-rs16	1	2.06833	1.96533	3.56163	2.0257	3.27241	1.67789	2.95325	1.7601
Echdc1	Echdc1	35.1682	35.1867	41.544	69.3102	68.6963	58.9465	37.2996	65.651	1.7601
Ccnl2	Ccnl2	196.81	228.555	340.798	473.194	451.283	423.669	255.388	449.382	1.75961
Vps8	Vps8	36.4824	38.3917	59.8854	82.9722	75.8762	78.262	44.9198	79.0368	1.75951
Gm15674	Gm15674	2.31416	1	4.86134	2.70775	6.12851	5.54482	2.72517	4.79369	1.75905
AC139568.1	AC139568.1	1	3.13667	1.96533	1	3.0514	6.68103	2.034	3.57748	1.75884
Rapgef4os1	Rapgef4os1	1	3.13667	1	2.70775	3.0514	3.27241	1.71222	3.01052	1.75825
Cfb	Cfb	1	2.06833	1	1.85388	2.0257	3.27241	1.35611	2.384	1.75797
Gm29228	Gm29228	1	2.06833	1	1.85388	2.0257	3.27241	1.35611	2.384	1.75797
Chmp4c	Chmp4c	92.9914	46.9383	73.4	132.497	99.4673	143.026	71.1099	124.997	1.7578
1700012P22Rik	1700012P22Rik	1	1	1	1	1	3.27241	1	1.75747	1.75747
1700093K21Rik	1700093K21Rik	1	1	1	1	1	3.27241	1	1.75747	1.75747
4930563F08Rik	4930563F08Rik	1	1	1	1	1	3.27241	1	1.75747	1.75747
4931400O07Rik	4931400O07Rik	1	1	1	1	1	3.27241	1	1.75747	1.75747
5430419D17Rik	5430419D17Rik	1	1	1	1	1	3.27241	1	1.75747	1.75747
9230106D20Rik	9230106D20Rik	1	1	1	1	1	3.27241	1	1.75747	1.75747
A230108P19Rik	A230108P19Rik	1	1	1	1	1	3.27241	1	1.75747	1.75747
A430110L20Rik	A430110L20Rik	1	1	1	1	1	3.27241	1	1.75747	1.75747
AC107453.4	AC107453.4	1	1	1	1	1	3.27241	1	1.75747	1.75747
AC107808.2	AC107808.2	1	1	1	1	1	3.27241	1	1.75747	1.75747
AC125064.1	AC125064.1	1	1	1	1	1	3.27241	1	1.75747	1.75747
AC126275.1	AC126275.1	1	1	1	1	1	3.27241	1	1.75747	1.75747
AC131586.2	AC131586.2	1	1	1	1	1	3.27241	1	1.75747	1.75747
AC134537.1	AC134537.1	1	1	1	1	1	3.27241	1	1.75747	1.75747
AC134860.2	AC134860.2	1	1	1	1	1	3.27241	1	1.75747	1.75747
AC139758.2	AC139758.2	1	1	1	1	1	3.27241	1	1.75747	1.75747
AC153143.1	AC153143.1	1	1	1	1	1	3.27241	1	1.75747	1.75747
AC154171.1	AC154171.1	1	1	1	1	1	3.27241	1	1.75747	1.75747
AC154759.1	AC154759.1	1	1	1	1	1	3.27241	1	1.75747	1.75747
AC156025.1	AC156025.1	1	1	1	1	1	3.27241	1	1.75747	1.75747
AC167019.4	AC167019.4	1	1	1	1	1	3.27241	1	1.75747	1.75747
Akap3	Akap3	1	1	1	1	1	3.27241	1	1.75747	1.75747
Apoa4	Apoa4	1	1	1	1	1	3.27241	1	1.75747	1.75747
Apod	Apod	1	1	1	1	1	3.27241	1	1.75747	1.75747
Arnt2	Arnt2	1	1	1	1	1	3.27241	1	1.75747	1.75747
Bdh2	Bdh2	1	1	1	1	1	3.27241	1	1.75747	1.75747
Brinp2	Brinp2	1	1	1	1	1	3.27241	1	1.75747	1.75747
Camp	Camp	1	1	1	1	1	3.27241	1	1.75747	1.75747
Car4	Car4	1	1	1	1	1	3.27241	1	1.75747	1.75747
Chrd	Chrd	1	1	1	1	1	3.27241	1	1.75747	1.75747
Col1a1	Col1a1	1	1	1	1	1	3.27241	1	1.75747	1.75747
Col22a1	Col22a1	1	1	1	1	1	3.27241	1	1.75747	1.75747
CT009550.3	CT009550.3	1	1	1	1	1	3.27241	1	1.75747	1.75747
CT010577.1	CT010577.1	1	1	1	1	1	3.27241	1	1.75747	1.75747
D630039A03Rik	D630039A03Rik	1	1	1	1	1	3.27241	1	1.75747	1.75747
Ddo	Ddo	1	1	1	1	1	3.27241	1	1.75747	1.75747
Dgkb	Dgkb	1	1	1	1	1	3.27241	1	1.75747	1.75747
Drc7	Drc7	1	1	1	1	1	3.27241	1	1.75747	1.75747
Epp13	Epp13	1	1	1	1	1	3.27241	1	1.75747	1.75747
Etv2	Etv2	1	1	1	1	1	3.27241	1	1.75747	1.75747
Eya2	Eya2	1	1	1	1	1	3.27241	1	1.75747	1.75747
Fancf	Fancf	1	1	1	1	1	3.27241	1	1.75747	1.75747
Fbxo24	Fbxo24	1	1	1	1	1	3.27241	1	1.75747	1.75747
Fndc3c1	Fndc3c1	1	1	1	1	1	3.27241	1	1.75747	1.75747
Frzb	Frzb	1	1	1	1	1	3.27241	1	1.75747	1.75747
Gabrr3	Gabrr3	1	1	1	1	1	3.27241	1	1.75747	1.75747
Gdap1	Gdap1	1	1	1	1	1	3.27241	1	1.75747	1.75747
Gm10228	Gm10228	1	1	1	1	1	3.27241	1	1.75747	1.75747
Gm11258	Gm11258	1	1	1	1	1	3.27241	1	1.75747	1.75747
Gm11483	Gm11483	1	1	1	1	1	3.27241	1	1.75747	1.75747
Gm11516	Gm11516	1	1	1	1	1	3.27241	1	1.75747	1.75747
Gm11529	Gm11529	1	1	1	1	1	3.27241	1	1.75747	1.75747
Gm11556	Gm11556	1	1	1	1	1	3.27241	1	1.75747	1.75747
Gm12464	Gm12464	1	1	1	1	1	3.27241	1	1.75747	1.75747
Gm12798	Gm12798	1	1	1	1	1	3.27241	1	1.75747	1.75747
Gm12864	Gm12864	1	1	1	1	1	3.27241	1	1.75747	1.75747
Gm12880	Gm12880	1	1	1	1	1	3.27241	1	1.75747	1.75747
Gm13194	Gm13194	1	1	1	1	1	3.27241	1	1.75747	1.75747
Gm13262	Gm13262	1	1	1	1	1	3.27241	1	1.75747	1.75747
Gm14567	Gm14567	1	1	1	1	1	3.27241	1	1.75747	1.75747
Gm15232	Gm15232	1	1	1	1	1	3.27241	1	1.75747	1.75747
Gm15262	Gm15262	1	1	1	1	1	3.27241	1	1.75747	1.75747
Gm15347	Gm15347	1	1	1	1	1	3.27241	1	1.75747	1.75747
Gm15518	Gm15518	1	1	1	1	1	3.27241	1	1.75747	1.75747
Gm15582	Gm15582	1	1	1	1	1	3.27241	1	1.75747	1.75747
Gm15690	Gm15690	1	1	1	1	1	3.27241	1	1.75747	1.75747
Gm16142	Gm16142	1	1	1	1	1	3.27241	1	1.75747	1.75747
Gm16268	Gm16268	1	1	1	1	1	3.27241	1	1.75747	1.75747
Gm16275	Gm16275	1	1	1	1	1	3.27241	1	1.75747	1.75747
Gm17030	Gm17030	1	1	1	1	1	3.27241	1	1.75747	1.75747
Gm19666	Gm19666	1	1	1	1	1	3.27241	1	1.75747	1.75747
Gm20597	Gm20597	1	1	1	1	1	3.27241	1	1.75747	1.75747
Gm20758	Gm20758	1	1	1	1	1	3.27241	1	1.75747	1.75747
Gm21631	Gm21631	1	1	1	1	1	3.27241	1	1.75747	1.75747
Gm21982	Gm21982	1	1	1	1	1	3.27241	1	1.75747	1.75747
Gm21984	Gm21984	1	1	1	1	1	3.27241	1	1.75747	1.75747
Gm22154	Gm22154	1	1	1	1	1	3.27241	1	1.75747	1.75747
Gm22516	Gm22516	1	1	1	1	1	3.27241	1	1.75747	1.75747
Gm22929	Gm22929	1	1	1	1	1	3.27241	1	1.75747	1.75747
Gm23169	Gm23169	1	1	1	1	1	3.27241	1	1.75747	1.75747
Gm23448	Gm23448	1	1	1	1	1	3.27241	1	1.75747	1.75747
Gm23902	Gm23902	1	1	1	1	1	3.27241	1	1.75747	1.75747
Gm24330	Gm24330	1	1	1	1	1	3.27241	1	1.75747	1.75747
Gm24499	Gm24499	1	1	1	1	1	3.27241	1	1.75747	1.75747
Gm24724	Gm24724	1	1	1	1	1	3.27241	1	1.75747	1.75747
Gm25820	Gm25820	1	1	1	1	1	3.27241	1	1.75747	1.75747
Gm27216	Gm27216	1	1	1	1	1	3.27241	1	1.75747	1.75747
Gm28729	Gm28729	1	1	1	1	1	3.27241	1	1.75747	1.75747
Gm28867	Gm28867	1	1	1	1	1	3.27241	1	1.75747	1.75747
Gm29254	Gm29254	1	1	1	1	1	3.27241	1	1.75747	1.75747
Gm30346	Gm30346	1	1	1	1	1	3.27241	1	1.75747	1.75747
Gm30694	Gm30694	1	1	1	1	1	3.27241	1	1.75747	1.75747
Gm31408	Gm31408	1	1	1	1	1	3.27241	1	1.75747	1.75747
Gm31518	Gm31518	1	1	1	1	1	3.27241	1	1.75747	1.75747
Gm33969	Gm33969	1	1	1	1	1	3.27241	1	1.75747	1.75747
Gm34639	Gm34639	1	1	1	1	1	3.27241	1	1.75747	1.75747
Gm35067	Gm35067	1	1	1	1	1	3.27241	1	1.75747	1.75747
Gm3604	Gm3604	1	1	1	1	1	3.27241	1	1.75747	1.75747
Gm36070	Gm36070	1	1	1	1	1	3.27241	1	1.75747	1.75747
Gm36406	Gm36406	1	1	1	1	1	3.27241	1	1.75747	1.75747
Gm37092	Gm37092	1	1	1	1	1	3.27241	1	1.75747	1.75747
Gm37514	Gm37514	1	1	1	1	1	3.27241	1	1.75747	1.75747
Gm37684	Gm37684	1	1	1	1	1	3.27241	1	1.75747	1.75747
Gm37711	Gm37711	1	1	1	1	1	3.27241	1	1.75747	1.75747
Gm38163	Gm38163	1	1	1	1	1	3.27241	1	1.75747	1.75747
Gm38416	Gm38416	1	1	1	1	1	3.27241	1	1.75747	1.75747
Gm40692	Gm40692	1	1	1	1	1	3.27241	1	1.75747	1.75747
Gm4129	Gm4129	1	1	1	1	1	3.27241	1	1.75747	1.75747
Gm42427	Gm42427	1	1	1	1	1	3.27241	1	1.75747	1.75747
Gm42578	Gm42578	1	1	1	1	1	3.27241	1	1.75747	1.75747
Gm42969	Gm42969	1	1	1	1	1	3.27241	1	1.75747	1.75747
Gm43097	Gm43097	1	1	1	1	1	3.27241	1	1.75747	1.75747
Gm43415	Gm43415	1	1	1	1	1	3.27241	1	1.75747	1.75747
Gm43625	Gm43625	1	1	1	1	1	3.27241	1	1.75747	1.75747
Gm43875	Gm43875	1	1	1	1	1	3.27241	1	1.75747	1.75747
Gm43924	Gm43924	1	1	1	1	1	3.27241	1	1.75747	1.75747
Gm44062	Gm44062	1	1	1	1	1	3.27241	1	1.75747	1.75747
Gm44312	Gm44312	1	1	1	1	1	3.27241	1	1.75747	1.75747
Gm44710	Gm44710	1	1	1	1	1	3.27241	1	1.75747	1.75747
Gm44771	Gm44771	1	1	1	1	1	3.27241	1	1.75747	1.75747
Gm44812	Gm44812	1	1	1	1	1	3.27241	1	1.75747	1.75747
Gm44873	Gm44873	1	1	1	1	1	3.27241	1	1.75747	1.75747
Gm45234	Gm45234	1	1	1	1	1	3.27241	1	1.75747	1.75747
Gm45251	Gm45251	1	1	1	1	1	3.27241	1	1.75747	1.75747
Gm45380	Gm45380	1	1	1	1	1	3.27241	1	1.75747	1.75747
Gm45619	Gm45619	1	1	1	1	1	3.27241	1	1.75747	1.75747
Gm5228	Gm5228	1	1	1	1	1	3.27241	1	1.75747	1.75747
Gm5949	Gm5949	1	1	1	1	1	3.27241	1	1.75747	1.75747
Gm5996	Gm5996	1	1	1	1	1	3.27241	1	1.75747	1.75747
Gm6100	Gm6100	1	1	1	1	1	3.27241	1	1.75747	1.75747
Gm6757	Gm6757	1	1	1	1	1	3.27241	1	1.75747	1.75747
Gm7568	Gm7568	1	1	1	1	1	3.27241	1	1.75747	1.75747
Gm7680	Gm7680	1	1	1	1	1	3.27241	1	1.75747	1.75747
Gm8652	Gm8652	1	1	1	1	1	3.27241	1	1.75747	1.75747
Gm9353	Gm9353	1	1	1	1	1	3.27241	1	1.75747	1.75747
H2-Q5	H2-Q5	1	1	1	1	1	3.27241	1	1.75747	1.75747
Hist1h2ac	Hist1h2ac	1	1	1	1	1	3.27241	1	1.75747	1.75747
Hoxc11	Hoxc11	1	1	1	1	1	3.27241	1	1.75747	1.75747
Hrnr	Hrnr	1	1	1	1	1	3.27241	1	1.75747	1.75747
Ifne	Ifne	1	1	1	1	1	3.27241	1	1.75747	1.75747
Il20	Il20	1	1	1	1	1	3.27241	1	1.75747	1.75747
Il25	Il25	1	1	1	1	1	3.27241	1	1.75747	1.75747
Khdrbs3	Khdrbs3	1	1	1	1	1	3.27241	1	1.75747	1.75747
Kif28	Kif28	1	1	1	1	1	3.27241	1	1.75747	1.75747
Klf14	Klf14	1	1	1	1	1	3.27241	1	1.75747	1.75747
Krt20	Krt20	1	1	1	1	1	3.27241	1	1.75747	1.75747
Ldb3	Ldb3	1	1	1	1	1	3.27241	1	1.75747	1.75747
Lgi2	Lgi2	1	1	1	1	1	3.27241	1	1.75747	1.75747
LOC102637012	LOC102637012	1	1	1	1	1	3.27241	1	1.75747	1.75747
Lrrc15	Lrrc15	1	1	1	1	1	3.27241	1	1.75747	1.75747
Ly86	Ly86	1	1	1	1	1	3.27241	1	1.75747	1.75747
Mir107	Mir107	1	1	1	1	1	3.27241	1	1.75747	1.75747
Mir222	Mir222	1	1	1	1	1	3.27241	1	1.75747	1.75747
Mir691	Mir691	1	1	1	1	1	3.27241	1	1.75747	1.75747
Muc13	Muc13	1	1	1	1	1	3.27241	1	1.75747	1.75747
Neto1	Neto1	1	1	1	1	1	3.27241	1	1.75747	1.75747
Nnmt	Nnmt	1	1	1	1	1	3.27241	1	1.75747	1.75747
Oat-rs1	Oat-rs1	1	1	1	1	1	3.27241	1	1.75747	1.75747
Odf4	Odf4	1	1	1	1	1	3.27241	1	1.75747	1.75747
Olfr1020	Olfr1020	1	1	1	1	1	3.27241	1	1.75747	1.75747
Olfr1366	Olfr1366	1	1	1	1	1	3.27241	1	1.75747	1.75747
Olfr223	Olfr223	1	1	1	1	1	3.27241	1	1.75747	1.75747
Olfr333-ps1	Olfr333-ps1	1	1	1	1	1	3.27241	1	1.75747	1.75747
Olfr536	Olfr536	1	1	1	1	1	3.27241	1	1.75747	1.75747
Olfr550	Olfr550	1	1	1	1	1	3.27241	1	1.75747	1.75747
Olfr552	Olfr552	1	1	1	1	1	3.27241	1	1.75747	1.75747
Olig3	Olig3	1	1	1	1	1	3.27241	1	1.75747	1.75747
Pdgfd	Pdgfd	1	1	1	1	1	3.27241	1	1.75747	1.75747
Plin1	Plin1	1	1	1	1	1	3.27241	1	1.75747	1.75747
Prg2	Prg2	1	1	1	1	1	3.27241	1	1.75747	1.75747
Rac2	Rac2	1	1	1	1	1	3.27241	1	1.75747	1.75747
Rhox3h	Rhox3h	1	1	1	1	1	3.27241	1	1.75747	1.75747
Rxfp3	Rxfp3	1	1	1	1	1	3.27241	1	1.75747	1.75747
Slc12a3	Slc12a3	1	1	1	1	1	3.27241	1	1.75747	1.75747
Slc17a8	Slc17a8	1	1	1	1	1	3.27241	1	1.75747	1.75747
Slc22a12	Slc22a12	1	1	1	1	1	3.27241	1	1.75747	1.75747
Slc30a3	Slc30a3	1	1	1	1	1	3.27241	1	1.75747	1.75747
Slc38a8	Slc38a8	1	1	1	1	1	3.27241	1	1.75747	1.75747
Smim17	Smim17	1	1	1	1	1	3.27241	1	1.75747	1.75747
Smim24	Smim24	1	1	1	1	1	3.27241	1	1.75747	1.75747
Smyd1	Smyd1	1	1	1	1	1	3.27241	1	1.75747	1.75747
Spaca5	Spaca5	1	1	1	1	1	3.27241	1	1.75747	1.75747
[truncated: 50,999 more rows]
