# Supplementary material for: Neonatal-derived IL-17 producing dermal γδ T cells are required to prevent spontaneous atopic dermatitis
Source: eLife. 2020 Feb 17;9:e51188. doi: 10.7554/eLife.51188 (PMC7025821; doi:10.7554/eLife.51188)
Supplement: Figure 4—figure supplement 1—source data 1. — Values indicate percent abundance per sample (total = 100). [file elife-51188-fig4-figsupp1-data1.xlsx]

## Sheet: 3 mo
Source data for Figure 4-Figure Supplement 1B. Values indicate percent abundance in each sample.
identity	Abx LMC 1	Abx LMC 2	Abx Sox13-/- 1	Abx Sox13-/- 2
abiotrophia defectiva	0	0	0.00267387	0
acetobacter aceti	0	0	0.00267387	0
acetobacteraceae	0	0	0	0
acidobacteriaceae	0.00318624	0	0	0
acidobacterium	0.00318624	0	0	0.00586373
acidovorax facilis	0	0	0	0
acidovorax spp.	0	0	0.00267387	0
acinetobacter lwoffii	0	0	0	0
acinetobacter sp.	0	0	0.00267387	0
acinetobacter spp.	0.00318624	0	0.970614	0.00586373
actinobacillus	0.00637247	0	0	0
actinobacteria	0	0	0	0
actinomyces odontolyticus	0	0	0	0
actinomyces sp.	0	0	0	0
actinomycetaceae	0	0	0.0080216	0
actinomycetales	0	0	0.00534774	0
actinoplanes spp.	0	0.00388304	0	0.00293186
aeribacillus geobacillus pallidus	0	0.00388304	0.00267387	0
aerococcus urinaeequi	0.235781	0	0	0
aeromonas	0	0	0.00267387	0
aggregatibacter segnis	0	0	0	0.00293186
aggregatibacter sp.	0	0	0	0
agrobacterium tumefaciens	0	0	0	0
agrococcus jenensis	0	0	0	0
agrococcus versicolor	0	0	0	0
agromyces spp.	0	0	0	0
alcaligenes faecalis	0	0	0	0
alkalibacterium	0	0	0	0
alteromonadales	0	0	0	0
anaerococcus	1.87351	0	0.00534774	0
anaerococcus hydrogenalis	0.00318624	0.00388304	0.00534774	0.00293186
anaerococcus octavius	0	0	0	0.00293186
anaerococcus prevotii	0.00318624	0.00388304	2.51878	0.00293186
anaerococcus spp.	0.00318624	0.00776609	0.00267387	0.00293186
anaeromyxobacteraceae	0	0	0	0
anaerosalibacter bizertensis	0	0	0	0
anaerotruncus colihominis	0	0	0	0
anoxybacillus gonensis	0	0	0	0
anoxybacillus kestanbolensis	0.00318624	0.00776609	0.00534774	0.00586373
aquabacterium spp.	0.181615	0	0	0
armatimonadales	0	0	0	0
atopobium rimae	0	0	0	0
atopostipes	0.0127449	0.00776609	0.00534774	0.00293186
atopostipes sp.	0.00318624	0	0.00267387	0.00586373
bacillaceae	0.00637247	0	0	0.00586373
bacillales	0.0892146	0.093193	0.0641728	0.0879559
bacilli	0	0	0	0
bacillus pumilus	0	0.00388304	0	0.00293186
bacillus sp.	0	0	0	0
bacillus thermoamylovorans	0	0	0	0
bacteroidaceae	0	0	0	0
bacteroidales	0.00637247	0.275696	0.00534774	0.0117275
bacteroides acidifaciens	0.0159312	0.31841	0.00534774	0.0117275
bacteroides acidofaciens	0	0.00388304	0	0
bacteroides sp.	0	0	0	0
bacteroides spp.	0.00318624	0.00388304	0	0
bacteroides uniformis	0.0191174	0.0194152	0.0240648	0.0234549
bacteroidetes	0.00955871	0.00776609	0	0.00879559
bacteroidia	0.0159312	0.190269	0.0080216	0.0146593
barnesiella	0.00318624	0	0	0
barnesiella spp.	0.00637247	0.00776609	0.0106955	0.0117275
bergeyella sp.	0.00318624	0.00388304	0	0
bergeyella spp.	0	0	0	0
betaproteobacteria	0	0	0	0
bifidobacteriaceae	0	0	0	0
bifidobacterium animalis	0.146567	0.0116491	0.0080216	0.0146593
bifidobacterium breve	1.07058	0.0155322	0.0187171	1.31054
bifidobacterium kashiwanohense	0	0	0	0
blastocatellaceae	0	0	0	0
blastococcus aggregatus	0.00318624	0.00388304	0.00534774	0.00586373
blastococcus saxobsidens	0	0	0	0
bordetella avium	0	0	0.00267387	0
bradyrhizobium elkanii	0.0159312	0.00776609	0.0133693	2.16958
bradyrhizobium spp.	0	0	0	0.020523
brevundimonas sp.	0.0350486	0	0	0
buchnera aphidicola	0	0	0	0
burkholderia	0	0	0	0
burkholderia spp.	0	0	0	0
burkholderia vietnamiensis	0	0	0.00267387	0
burkholderiales	0	0.13979	0	0
caldibacillus geobacillus debilis	0	0	0	0
caldimonas taiwanensis	0	0.0970761	0	0
candidatus odyssella	0	0	0.00267387	0.700715
candidatus phytoplasma sugarcane phytoplasma (uncharacterized)	0.00318624	0	0.00267387	0
candidatus saccharibacteria	0	0	0	0
capnocytophaga gingivalis	0	0	0	0
capnocytophaga granulosa	0	0.205801	0.00267387	0
capnocytophaga sputigena	0	0	0.00267387	0
carnobacterium viridans	0	0	0	0
catonella morbi	0	0.00388304	0	0
caulobacter sp.	0.00318624	0	0.00267387	0.00293186
cellvibrio sp.	0.0286761	0	0	0
cetobacterium spp.	0	0	0	0.00293186
chitinophagaceae	0.00318624	0	0	0
chloroflexaceae	0.328182	0	0.00267387	0
chryseobacterium sp.	0	0.163088	0	0.00293186
chryseobacterium wanjuense	0.248526	0	0	0
clostridia	0.0159312	0.0194152	0.0213909	0.0117275
clostridiaceae	0.0350486	0.0349474	0.0561512	0.0351824
clostridiales	0.0637247	0.0698948	0.0481296	0.085024
clostridium	0.0191174	0.0194152	0.0213909	0.0175912
clostridium perfringens	0	0	0	0
clostridium sp.	0.0127449	0.0271813	0.0187171	0.020523
cohnella sp.	0	0.00388304	0	0
collinsella aerofaciens	0	0	0	0
comamonas sp.	0	0	0	0
coriobacteriaceae	0.00318624	0.00388304	0.00534774	0
coriobacteriales	0	0.00388304	0.00267387	0.00293186
corynebacteriaceae	0.00318624	0	0.00534774	0.00586373
corynebacterium	0	0.00388304	0.00267387	0
corynebacterium freneyi	0	0	0	0
corynebacterium glucuronolyticum	0.0350486	0.00388304	0.00267387	0
corynebacterium mastitidis	0.0796559	0.209684	0.0721944	0.085024
corynebacterium matruchotii	0.00637247	0.00776609	0	0.0117275
corynebacterium pseudodiphtheriticum	0	0.00776609	0	0.00293186
corynebacterium pseudogenitalium	0	0.00388304	0	0
corynebacterium riegelii	0	0	0.00534774	0
corynebacterium sp.	0	0	0	0
corynebacterium spp.	0.137008	0.326176	0.983984	0.25214
corynebacterium tuberculostearicum	1.08332	0.0116491	1.76475	1.09359
cupriavidus metallidurans	0	0	0	0.00293186
curtobacterium flaccumfaciens	0.00318624	0.0116491	0	0.00293186
curtobacterium pusillum	0.305879	0.00388304	0.00534774	0
cyanobacteria	0	0	0	0
cytophagaceae	0	0	0	0
cytophagales	0	0	0.344929	0
deferribacteraceae	0.0127449	0	0.0187171	0.0117275
deferribacterales	0	0	0.00267387	0.00586373
deinococcus geothermalis	0	0	0	0
delftia sp.	0	0	0	0.00293186
delftia spp.	0.716903	0.0698948	0.040108	1.24604
deltaproteobacteria	0	0	0	0
desulfobacterales	0	0	0	0
desulfovibrionaceae	0	0	0	0.00293186
desulfovibrionales	0	0	0	0
desulfuromonadales	0	0	0	0
devosia crocina	0	0	0	0
devosia spp.	0	0.00388304	0	0.00293186
dialister invisus	0	0	0	0.00293186
dolosigranulum spp.	0.00318624	0	0	0
duganella zoogloeoides	0	0	0	0
empedobacter	0	0.00388304	1.14709	0
enhydrobacter aerosaccus	0	0	0	0
enterobacter hormaechei	0	0	0.00267387	0
enterobacter ludwigii	0	0	0	0
enterobacter sp.	0.968616	0	0.0080216	0.00293186
enterobacteriales	0	0	0	0
enterococcus casseliflavus	0.00955871	0.0543626	0.0133693	0.0557054
enterococcus cecorum	0	0	0	0
enterococcus gallinarum	24.5404	68.6561	29.8029	44.5907
enterococcus mundtii	0	0	0	0
enterorhabdus caecimuris	0	0	0	0
erysipelatoclostridium clostridium cocleatum	0	0.0621287	0	0
erysipelotrichia	0.00318624	0	2.23803	0
escherichia coli	0.00318624	0	0	0
eubacterium	0	0.252398	0	0
eubacterium rectale	0	0	0	0
eubacterium sp.	0.00318624	0.00388304	0	0
fimbriimonadales	0	0	0	0
firmicutes	0	0.00388304	0	0
flavobacteriaceae	0	0	0	0
flavobacterium	0	0	0	0
frigoribacterium faeni	0	0	0	0
fusobacteriaceae	0.00318624	0	0	0.00293186
fusobacteriales	0	0	0	0
fusobacterium necrophorum	0	0	0	0
fusobacterium nucleatum	0	0.00388304	0.00267387	0
fusobacterium periodonticum	0.00318624	0	0.00267387	0
fusobacterium spp.	0	0	0	0
galbitalea	0	0	0	0
gammaproteobacteria	0	0	0.106955	0
gemella haemolysans	0.388721	0.00388304	0	0.00293186
gemella morbillorum	0.00318624	0.00388304	0	0
gemella sanguinis	0	0.00388304	0	0.00293186
gemmatimonadaceae	0.00318624	0.00388304	0	0.433916
gemmatimonadales	0	0.00388304	0	0.00586373
geobacillus	0	0.100959	0	0
geobacillus bacillus sp.	0	0	0	0
geobacillus stearothermophilus	0.00637247	0.00388304	0.0106955	0.00293186
gloeobacteraceae	0	0	0	0
gordonia terrae	0	0	0	0
granulicatella adiacens	0	0.00776609	0.00267387	0
granulicatella elegans	0	0.00388304	0	0.00293186
granulicatella paradiacens	0.00318624	0.00388304	0.00267387	0.00293186
haemophilus parainfluenzae	1.27449	0.621287	0.00534774	0.00293186
haemophilus sputorum	0	0	0	0
halolactibacillus halophilus	0	0.00388304	1.15778	0.00586373
halospirulina sp.	0	0	0	0
helicobacter ganmani	0.0605385	0.0582456	0.0534774	0.0586373
helicobacter hepaticus	0.00318624	0	0.00534774	0.00586373
herbaspirillum huttiense	0	0	0	0
hydrogenophaga spp.	0	0	0	0
hydrogenophilus hirschii	0	0	0	0.00293186
hymenobacter	0.809304	0.00388304	0	0
hymenobacter ginsengisoli	0	0	0	0.00586373
hymenobacter spp.	0	0	0	0
janthinobacterium sp.	0	0	0	0
jeotgalicoccus sp.	0	0	0	0
kaistia adipata	2.16983	0	0.0133693	0
kaistobacter spp.	0.00318624	0	0.00267387	0
klebsiella oxytoca	0.00955871	0	0.00267387	0
kocuria rhizophila	0	0	0	0
kosakonia enterobacter cowanii	0.232595	0	0.00267387	0
kurthia gibsonii	0	0.00388304	0	0
kytococcus sedentarius	0	0	0	0
lachnoanaerobaculum eubacterium saburreum	0	0	0	0
lachnospiraceae	0.00318624	0.0155322	0	0.0117275
lactobacillaceae	0	0	0.00267387	0
lactobacillales	0.00318624	0	0.0106955	0.00586373
lactobacillus acidophilus	0.0350486	0.0232983	0.0160432	0.0293186
lactobacillus curvatus	0	0	0.00534774	0
lactobacillus gallinarum	0.00955871	0.0155322	0.0106955	0.0117275
lactobacillus helveticus	0	0	0	0
lactobacillus johnsonii	0	0.240749	0	0
lactobacillus murinus	0.00637247	0	0	0.00293186
lactobacillus paracasei	0.00318624	0	0.00267387	0.00879559
lactobacillus plantarum	3.25315	0.0116491	0.0187171	0.0117275
lactobacillus salivarius	0	0.00388304	0.0133693	0.00293186
lactobacillus zeae	0.00318624	0.00388304	0.0106955	0
lactococcus lactis	0	0	0	0
lautropia spp.	0	0	0	0
legionellales	0	0	0	0
leifsonia	0.00318624	0	0	0
leptolyngbyaceae	0	0	0	0
leptotrichia sp.	0.00318624	0.00388304	0	0
leuconostoc carnosum	0	0	0.00267387	0
marinococcus sp.	0	0	0	0.00293186
marmoricola sp.	0	0	0	0
massilia spp.	0.00318624	0.00776609	0.270061	0
massilia timonae	0.00318624	0	0	0.00293186
methylobacterium adhaesivum	0	0.368889	0	0.00293186
methylobacterium sp.	0.00955871	0	0	0
microbacteriaceae	0	0	0	0
microbacterium sp.	0.3473	0	0.0080216	0
microbacterium spp.	0.318624	0	0.00267387	0
microbacterium testaceum	0	0	0	0
microchaetaceae	0	0	0.00267387	0
micrococcus luteus	0	0	0.00267387	0.00586373
micrococcus sp.	0	0	0.00267387	0
microvirga spp.	0	0.00388304	0	0.00586373
modestobacter sp.	0	0	0	0
mucispirillum	8.36387	8.57764	4.20867	8.49654
mucispirillum sp.	11.9643	13.3771	17.3267	22.4112
mycobacteriaceae	0	0	0	0
mycobacterium ratisbonense	0	0	0	0
neisseria sicca	0	0.104842	0	0
neisseria spp.	0	0.00388304	0	0.00293186
neisseria subflava	0.00318624	0	0.00267387	0.00293186
nesterenkonia sp.	0.00318624	0	0	0
nitrospirales	0	0	0	0.00293186
nocardioides	0.0605385	0.00388304	0.41445	0
nocardiopsis	0	0	0	0.00293186
nostocales	0	0	0.00267387	0
novosphingobium spp.	0	0	0	0
okibacterium fritillariae	0	0.104842	0	0
opitutus	0.00318624	0	0.00534774	0.00586373
oscillatoriales	0	0	0	0
oscillospira spp.	0.00637247	0.163088	0.0133693	0.00293186
paenibacillus	0.00318624	0.295111	0.00534774	0
paenibacillus chondroitinus	0	0.00388304	0.00267387	0.0175912
paenibacillus hordei	0.732834	0.104842	0.0080216	0.00586373
paenibacillus sp.	0	0	0	0
pantoea agglomerans	1.05464	0.00388304	0.0454558	0.00293186
pantoea ananatis	0.662737	0.0232983	27.0649	0.0674329
pantoea sp.	0	0	0.00534774	0
parabacteroides distasonis	0.00318624	0.00388304	0.00267387	0.00293186
paracoccus sp.	0.235781	0.00388304	0	0
paracraurococcus	0	0	0	0
paracraurococcus spp.	0	0	0	0
pasteurella pneumotropica	0.0159312	0.0271813	0.0267387	0.0293186
pasteurellaceae	0.00318624	0.00776609	0.0160432	0.0117275
pasteurellales	0	0	0.00267387	0
pedobacter sp.	0	0.00388304	0	0
peptococcus sp.	0.00318624	0	0	0
peptoniphilaceae	0	0	0	0.00293186
peptoniphilus asaccharolyticus	0	0	0	0
peptostreptococcaceae	0	0	0	0
peptostreptococcus stomatis	0	0	0	0
phenylobacterium sp.	0	0	0	0
phocaeicola spp.	0	0	0	0.00293186
photobacterium leiognathi	0	0	0	0
planctomycetaceae	0	0	0	0
planifilum spp.	0	0	0	0
plantibacter sp.	0	0	0	0
polyangiaceae	0	0	0	0
polyangium	0	0	0	0.00293186
porphyromonadaceae	0.00318624	0.0155322	0.00267387	0.0117275
prevotella aurantiaca	0	0.00776609	0	0.00293186
prevotella oris	0	0	0	0
prevotella shahii	0	0	0	0.00586373
prevotella sp.	0.00318624	0.00388304	0	0
prevotella spp.	0	0	0	0
promicromonospora aerolata	0	0	0	0
propionibacteriaceae	0	0.00388304	0.00534774	0.00293186
propionibacterium acnes	9.33248	0.516445	3.34234	8.39393
propionibacterium avidum	0	0	0	0
propionibacterium granulosum	0.203919	0.00776609	0	0.00293186
propionibacterium spp.	0	0	0	0
prosthecomicrobium	0	0	0	0.00293186
proteobacteria	0.00318624	0.221333	0	0
proteus vulgaris	0	0	0	0
pseudoclavibacter	0	0	0	0
pseudoclavibacter sp.	0	0	0	0
pseudomonadaceae	0.00637247	0	0	0
pseudomonadales	0	0	0	0
pseudomonas	0	0	0	0.00293186
pseudomonas argentinensis	0	0	0	0
pseudomonas chlororaphis	0.0254899	0	0	0
pseudomonas oleovorans	0	0	0	0
pseudomonas protegens	0	0	0	0
pseudomonas putida	1.05464	0.298994	0.0080216	0.00879559
pseudomonas rhizosphaerae	0	0.330059	0	0
pseudomonas sp.	0.356858	0.00776609	0.0267387	0.0498417
pseudomonas spp.	7.85726	0.368889	0.978636	1.32813
pseudomonas stutzeri	0	0	0	0
pseudomonas syringae	0	0	0	0
pseudomonas tolaasii	0.277202	0.00776609	0.0080216	0.00879559
pseudomonas trivialis	0.00955871	0.00776609	0	0.281459
pseudomonas veronii	7.23913	0.35724	0.582903	1.06427
pseudomonas viridiflava	0	0.00388304	0	0
pseudonocardiaceae	0.00318624	0	0	0
ralstonia pickettii	0.111518	0	0	0.00293186
rathayibacter tritici	0	0.00388304	0.681836	0
rhodococcus	0	0	0	0.00586373
rhodococcus fascians	0	0	0	0
rhodococcus sp.	0.00637247	0	0	0.00293186
rhodococcus spp.	0.00318624	0	0.00534774	0.00586373
rhodospirillaceae	0	0.124257	0	0
rhodospirillales	0	0	0	0
rosenbergiella nectarea	0	0	0	0
rothia mucilaginosa	0	0	0	0
rubrobacter spp.	0	0.00388304	0	0
ruminococcaceae	0.0159312	0.0116491	0	0.0117275
selenomonas sp.	0	0	0	0
serratia sp.	0	0	0	0
shewanellaceae	0	0	0	0
shigella flexneri	1.14704	0.00388304	0.0106955	0
shuttleworthia satelles	0	0	0	0
solirubrobacteraceae	0	0	0	0
sphaerobacter	0	0	0.00267387	0
sphaerobacteraceae	0	0	0	0
sphaerobacterales	0.00318624	0	0	0
sphingobacteriales	0	0	0	0
sphingobacteriia	0	0	0	0
sphingobacterium	0	0.00388304	0.00267387	0.00293186
sphingobacterium spp.	0	0	0	0
sphingomonas	0	0	0	0
sphingomonas aerolata	0	0	0	0
sphingomonas cynarae	0	0	0	0.178844
sphingomonas echinoides	0	0	0.00267387	0
sphingomonas melonis	0	0	0	0
sphingomonas sp.	0	0	0	0
sphingomonas spp.	0	0.411603	0	0
sphingomonas wittichii	0	0.00388304	0	0.00293186
spirochaetaceae	0	0	0	0
spirochaetales	0	0	0	0
staphylococcaceae	0.61813	0	0	0
staphylococcus aureus	0	0.00388304	0	0
staphylococcus epidermidis	2.99506	0.0854269	0.0481296	1.55682
staphylococcus hominis	0.00318624	0.00388304	0.00534774	0
staphylococcus lentus	0	0	0.0080216	0.00879559
staphylococcus nepalensis	0.0127449	0.0155322	0.0080216	0.00879559
staphylococcus pasteuri	0	0	0	0
staphylococcus saprophyticus	0.251713	0.310643	0.315516	0.237481
staphylococcus sp.	0.00318624	0	0	0
staphylococcus spp.	0.0223036	0	0.917137	0.00586373
staphylococcus succinus	0	0.00388304	0.00267387	0
stenotrophomonas maltophilia	0.00637247	0.0155322	0.0160432	1.35452
stenotrophomonas rhizophila	0	0	0	0
stenotrophomonas spp.	0	0	0	0
streptococcaceae	0	0	0.00534774	0
streptococcus acidominimus	0.00318624	0.0116491	0.0106955	0.0175912
streptococcus cristatus	0	0.00388304	0.00267387	0
streptococcus gordonii	0	0	0	0
streptococcus infantis	0	0.00388304	0.00267387	0.00586373
streptococcus mitis	0	0.00388304	0	0
streptococcus oralis	0	0	0	0
streptococcus salivarius	0.00955871	0	0	0.00293186
streptococcus sanguinis	0.00637247	0.524211	0	0.00586373
streptococcus sp.	0	0	0	0
streptococcus spp.	0.0127449	0.00388304	0.0267387	0.0263868
streptococcus thermophilus	3.82348	0.365006	1.59363	1.63598
streptomycetaceae	0	0	0	0
sutterellaceae	0	0	0	0
synechococcus sp.	0	0	0	0
tepidimonas taiwanensis	0	0	0	0
tepidiphilus spp.	0	0	0	0
tsukamurellaceae	0.00318624	0	0.0909115	0.0175912
turicibacter spp.	0.00318624	0	0	0
veillonella parvula	0	0	0.0080216	0.00586373
veillonella tobetsuensis	0	0.00388304	0.00267387	0
weissella cibaria	0	0.0698948	0.00267387	0
weissella hellenica	0	0	0	0
xanthomonadaceae	0	0	0	0
xanthomonas melonis	0	0	0	0

## Sheet: 6 mo
Source data for Figure 4-Figure Supplement 1B. Values indicate percent abundance in each sample.
identity	Abx LMC 1	Abx LMC 2	Abx Sox13-/- 1	Abx Sox13-/- 2	Abx Sox13-/- 3
abiotrophia defectiva	0	0	0	0	0
acetobacter aceti	0.00486523	0	0	0	0
acetobacteraceae	0	0	0	0	0
acidobacteriaceae	0.00486523	0	0	0.79915	0
acidobacterium	0	0.0127194	0	1.61678	0
acidovorax facilis	0	0	0	0	0
acidovorax spp.	0	1.93335	0	0	0.00664673
acinetobacter lwoffii	0	0	0.00321719	0.43884	0
acinetobacter sp.	0	0.0063597	0	0	0
acinetobacter spp.	0	0.0063597	0.00321719	0	0
actinobacillus	0	0	0.00321719	0	0
actinobacteria	0	0	0	0	0.00664673
actinomyces odontolyticus	0	0	0.10295	0	0
actinomyces sp.	0	0	0.0514751	0	0
actinomycetaceae	0	0	0	0.00461936	0
actinomycetales	0	0	0	0	0
actinoplanes spp.	0.00973047	0	0	0.785292	0
aeribacillus geobacillus pallidus	0.866011	0	0.00321719	0	0.00332336
aerococcus urinaeequi	0	0.0063597	0	0	0
aeromonas	0	0	0	0	0.00332336
aggregatibacter segnis	0	0	0.331371	0	0
aggregatibacter sp.	0	0.0063597	0.656307	0	0
agrobacterium tumefaciens	0	0.0063597	0.00965158	0	0.00332336
agrococcus jenensis	0	0	0	0	0
agrococcus versicolor	0	0	0	0	0
agromyces spp.	0	0.0063597	0	0	0
alcaligenes faecalis	0	0	0	0.00461936	0.874045
alkalibacterium	0	0.381582	0.00321719	0	0
alteromonadales	0	0	0	0	0
anaerococcus	0	0	0.00321719	0.00461936	0.00332336
anaerococcus hydrogenalis	0.00486523	0	0	0	0
anaerococcus octavius	0	0.0063597	0	0	0
anaerococcus prevotii	0	0	0	0	0
anaerococcus spp.	2.16016	0	0.00321719	0.00461936	0.857428
anaeromyxobacteraceae	0	0	0	0	0
anaerosalibacter bizertensis	0	0	0	0	0
anaerotruncus colihominis	0	0	0	0	0
anoxybacillus gonensis	0.00486523	0	0	0.595898	0
anoxybacillus kestanbolensis	0.885472	0.0063597	0.00321719	1.75074	0.00664673
aquabacterium spp.	0	0	0	0	0
armatimonadales	0	0	0	0	0
atopobium rimae	1.42065	0.0063597	0.00321719	0.00461936	0.00332336
atopostipes	0.00486523	0.0254388	0.00643439	0	0
atopostipes sp.	0.00973047	0	0.00321719	0.00923873	0.00664673
bacillaceae	0.00486523	0	0	0.00461936	0
bacillales	1.39146	0.158993	0.0611267	0.0692905	0.119641
bacilli	0.00486523	0	0	0	0
bacillus pumilus	0	0	0	0	0
bacillus sp.	0	0	0	0.00461936	0
bacillus thermoamylovorans	0	0	0.00321719	0.300259	0
bacteroidaceae	0	0	0	0	0
bacteroidales	0	0	0.00321719	0.0138581	0.0199402
bacteroides acidifaciens	0.0145957	0.0317985	0.00643439	0.0184775	0.00997009
bacteroides acidofaciens	0.00486523	0	0	0	0
bacteroides sp.	0.00486523	0	0	0.00461936	0.00664673
bacteroides spp.	0	0	0	0	0.00332336
bacteroides uniformis	0.0145957	0.0381582	0.016086	0.00923873	0.0332336
bacteroidetes	0	0.0127194	0	0.0184775	0.00332336
bacteroidia	0.00486523	0.0190791	0.00643439	0.00461936	0.00664673
barnesiella	0.00486523	0	0	0	0
barnesiella spp.	0.00486523	0.0317985	0.00965158	0.0138581	0.0166168
bergeyella sp.	0.00486523	0.979395	0.00643439	0.0277162	0.00332336
bergeyella spp.	0	0	1.24184	0.00461936	0
betaproteobacteria	0	0	0	0	0
bifidobacteriaceae	0	0	0.00321719	0	0.00332336
bifidobacterium animalis	0.21407	0.0127194	6.90731	0.0138581	0.0232635
bifidobacterium breve	0.00973047	0.0317985	2.56732	0.00461936	0.0166168
bifidobacterium kashiwanohense	0	0	0.00321719	0	0
blastocatellaceae	0	0	0	0	0
blastococcus aggregatus	0	0.0063597	0	2.78086	0.00332336
blastococcus saxobsidens	0	0	0	0	0
bordetella avium	0	0.0063597	0	0	0.00664673
bradyrhizobium elkanii	0.00973047	0.0127194	0.00321719	0.00461936	0.00997009
bradyrhizobium spp.	0	0	0	0	0
brevundimonas sp.	0	0	0	0	0
buchnera aphidicola	0	0	0	0	0
burkholderia	0	0	0	0	0
burkholderia spp.	0	0	0	0.327975	0
burkholderia vietnamiensis	0	0.267108	0.0128688	0	0
burkholderiales	0	0.0063597	0.00321719	0	0
caldibacillus geobacillus debilis	0	0	0	0.0138581	0
caldimonas taiwanensis	0	0	0	0	0.00332336
candidatus odyssella	0.00486523	0	0	0.00923873	0
candidatus phytoplasma sugarcane phytoplasma (uncharacterized)	0	0.0063597	0	0	0
candidatus saccharibacteria	0	0	0	0	0
capnocytophaga gingivalis	0	0	0.357108	0	0
capnocytophaga granulosa	0	0	0	0.00461936	0.00332336
capnocytophaga sputigena	0	0	0.112602	0	0
carnobacterium viridans	0	0.0127194	0	0	0
catonella morbi	0	0	0.739954	0	0.00332336
caulobacter sp.	0	0	0	0	0
cellvibrio sp.	0	0	0	0	0
cetobacterium spp.	0	0	0	0	0
chitinophagaceae	0	0	0	0	0
chloroflexaceae	0	0	0.00321719	0	0.00664673
chryseobacterium sp.	0.00486523	0	0.00321719	0.383407	0.00332336
chryseobacterium wanjuense	0	0	0	0	0.00332336
clostridia	0.0291914	0.0508776	0.0128688	0.0277162	0.0299103
clostridiaceae	0.0340566	0.0953956	0.0193032	0.0184775	0.0631439
clostridiales	1.04116	0.114475	0.0514751	0.0646711	0.0864074
clostridium	0.0194609	0.489697	0.00643439	0.0415743	0.0299103
clostridium perfringens	0	0	0	0.00461936	0
clostridium sp.	0.0145957	0.0381582	0.00965158	0.665188	0.0166168
cohnella sp.	0	0	0	0	0
collinsella aerofaciens	0	0	0	0	0
comamonas sp.	0	0	0	0	0
coriobacteriaceae	0	0.0063597	0.00643439	0	0.00332336
coriobacteriales	0.00973047	0	0.00321719	0.00923873	0
corynebacteriaceae	0	0.0063597	0.00321719	0	0.00332336
corynebacterium	0	0	0	0	0.00332336
corynebacterium freneyi	0.00486523	0.0063597	0	0	0
corynebacterium glucuronolyticum	0	0	0	0.00923873	0
corynebacterium mastitidis	0.10217	0.165352	0.0611267	0.0923873	0.106348
corynebacterium matruchotii	0	0.0127194	2.53515	0.00923873	0.0166168
corynebacterium pseudodiphtheriticum	0	0.0063597	0	0.189394	1.73147
corynebacterium pseudogenitalium	0.00486523	0	0	0.00461936	0.00997009
corynebacterium riegelii	0	0	0	0	0.00664673
corynebacterium sp.	0	0	0	0.00461936	0
corynebacterium spp.	1.55201	0.063597	1.23218	6.72579	2.27983
corynebacterium tuberculostearicum	0.0145957	0	0.00643439	1.01626	0.00664673
cupriavidus metallidurans	0	0	0	0	0
curtobacterium flaccumfaciens	0	0.8522	0	0	0
curtobacterium pusillum	0.00973047	0.566014	0.801081	0.00461936	0.00332336
cyanobacteria	0	0	0	0	0.0132935
cytophagaceae	0	0	0	0	0
cytophagales	0	0	0.00321719	0	0
deferribacteraceae	0.0145957	0.0190791	0.00965158	0.0184775	0.00664673
deferribacterales	0	0	0.00321719	0	0
deinococcus geothermalis	0	0	0	0	0
delftia sp.	0.0194609	0.0127194	0	0	0.00332336
delftia spp.	2.76345	3.65683	0.402149	0.0230968	1.93752
deltaproteobacteria	0	0	0.0321719	0	0
desulfobacterales	0	0	0	0	0
desulfovibrionaceae	0	0	0	0	0.00332336
desulfovibrionales	0	0	0	0	0
desulfuromonadales	0	0.0063597	0	0.397265	0
devosia crocina	0	0	0	0	0
devosia spp.	0	0	0	0	0
dialister invisus	0	0	0	0	0
dolosigranulum spp.	0	0	0	0	0
duganella zoogloeoides	0	0.546935	0	0	0
empedobacter	0	0.0063597	0	0	0
enhydrobacter aerosaccus	0	0	0	0	0
enterobacter hormaechei	0	0	0	0	0
enterobacter ludwigii	0	0	0	0	0
enterobacter sp.	0.00486523	0	0.00321719	0	0.00332336
enterobacteriales	0	0	0	0	0
enterococcus casseliflavus	0.0437871	0.0317985	0.0128688	0.0138581	0.0498504
enterococcus cecorum	0	0	0	0	0
enterococcus gallinarum	46.317	47.6342	18.3573	33.8322	65.879
enterococcus mundtii	0	0	0	0	0
enterorhabdus caecimuris	0	0	0	0	0
erysipelatoclostridium clostridium cocleatum	0	0	0	0	0
erysipelotrichia	0.0145957	0	0.00321719	0	0.00332336
escherichia coli	0	0.0063597	0	0	1.59854
eubacterium	0	0	0	0	0
eubacterium rectale	0	0	0	0	0
eubacterium sp.	0	0	1.21288	0	0
fimbriimonadales	0	0	0	0	0
firmicutes	0	0	0	0.00461936	0.00332336
flavobacteriaceae	0	0	0	0.00461936	0
flavobacterium	0	0.0063597	0	0	0
frigoribacterium faeni	0	0	0	0	0
fusobacteriaceae	0	0.731366	0	0	0.00332336
fusobacteriales	0.00486523	0	0	0.00461936	0.00332336
fusobacterium necrophorum	0	0	0	0	0
fusobacterium nucleatum	0	0.0063597	1.49599	0	0
fusobacterium periodonticum	0.00486523	0.0127194	1.94962	0.00461936	0
fusobacterium spp.	0	0	0	0	0
galbitalea	0	0	0	0	0
gammaproteobacteria	0	0	0	0	0
gemella haemolysans	0	0	0	0	0
gemella morbillorum	0	0	0	0	0
gemella sanguinis	0.00486523	0.0190791	2.09761	0.00461936	0
gemmatimonadaceae	0	0	0	0	0
gemmatimonadales	0.00486523	0	0	0.572801	0
geobacillus	0	0	0	0.00461936	0
geobacillus bacillus sp.	0	0	0	0	0
geobacillus stearothermophilus	0.00486523	0.0127194	0	0.00461936	0
gloeobacteraceae	0	0	0.00321719	0	0.717846
gordonia terrae	0	0	0	0	0
granulicatella adiacens	0.00486523	0.0063597	0.546923	0	0.00332336
granulicatella elegans	0.00486523	0	0.566226	0.00461936	0
granulicatella paradiacens	0	0	1.26114	0	0.00664673
haemophilus parainfluenzae	0	0	3.79629	0.00461936	0
haemophilus sputorum	0	0	0.283113	0	0
halolactibacillus halophilus	0	0	0	0	0.00664673
halospirulina sp.	0.0243262	0.0572373	0	0	0
helicobacter ganmani	0.0486523	0.0826762	0.0643439	0.0600517	0.0830841
helicobacter hepaticus	0	0.0063597	0	0	0.00664673
herbaspirillum huttiense	0	0	0.55014	0	0
hydrogenophaga spp.	0	0	0	0	0
hydrogenophilus hirschii	0.218935	0.0063597	0.00321719	0.129342	0.00664673
hymenobacter	0	0	0	0	0.00332336
hymenobacter ginsengisoli	0	0.0063597	0	0.309497	0.00332336
hymenobacter spp.	0	0	0	0	0
janthinobacterium sp.	0	0	0	0	0.412097
jeotgalicoccus sp.	0	0	0	0	0.00332336
kaistia adipata	0	0.0063597	0	0	0
kaistobacter spp.	0	0	0	0	0.00332336
klebsiella oxytoca	0	0	0	0	0.00332336
kocuria rhizophila	0	0	0	0	0
kosakonia enterobacter cowanii	0	1.12567	0.00321719	0	0
kurthia gibsonii	0	0	0.00321719	0	0.00332336
kytococcus sedentarius	0	0.0063597	0	0	1.11
lachnoanaerobaculum eubacterium saburreum	0	0	0	0	0
lachnospiraceae	0.00486523	0.0254388	0.00321719	0.00461936	0.00664673
lactobacillaceae	0	0	0	0	0.00664673
lactobacillales	0.00486523	0.0063597	0.00321719	1.25185	0
lactobacillus acidophilus	0.0437871	0.0508776	3.13676	0.0230968	0.0332336
lactobacillus curvatus	0.00973047	0.0063597	0.00321719	0	0.00332336
lactobacillus gallinarum	3.86786	0.0127194	1.48634	0.00923873	0.00332336
lactobacillus helveticus	0	0.0127194	0.00321719	0	0
lactobacillus johnsonii	0	0.0063597	0	0	0.00664673
lactobacillus murinus	0	0	0.00321719	0.00923873	0.00664673
lactobacillus paracasei	0.00486523	0.8522	0.369977	0.0138581	2.74842
lactobacillus plantarum	0.00486523	0	0.00321719	0.00923873	0.0132935
lactobacillus salivarius	0	0.0063597	0	0.00461936	0.0199402
lactobacillus zeae	0.00486523	0	0	0	0.00332336
lactococcus lactis	0	0	0	0	0
lautropia spp.	0	0	0	0	0
legionellales	0	0.0063597	0	0	0.00332336
leifsonia	0	0	0	0.00461936	0
leptolyngbyaceae	0	0	0	0	0
leptotrichia sp.	0	0.0063597	1.17749	0	0.00332336
leuconostoc carnosum	0.00486523	0	0	0.0138581	0
marinococcus sp.	0	0	0	0	0.00332336
marmoricola sp.	0.00486523	0	0	0.485033	0
massilia spp.	0	0.0063597	0	0	0
massilia timonae	0.00486523	1.08115	0.00321719	0	0.00332336
methylobacterium adhaesivum	0	0	0	0	0
methylobacterium sp.	0	0	0	0	0
microbacteriaceae	0	0	0	0	0.00332336
microbacterium sp.	0	0	0	0	0
microbacterium spp.	0	0	0	0	0
microbacterium testaceum	0	0	0	0	0
microchaetaceae	0	0.0127194	0	0.00461936	0
micrococcus luteus	0.00973047	0.0127194	1.43809	1.83851	0.00664673
micrococcus sp.	0	0	0	0.00461936	0.329013
microvirga spp.	1.44497	0	0.00321719	0.00461936	0
modestobacter sp.	0	0	0	0	0.00332336
mucispirillum	7.78437	2.56932	4.903	3.74169	1.87105
mucispirillum sp.	6.7724	8.2231	9.47463	4.24982	2.19674
mycobacteriaceae	0	0	0	0	0
mycobacterium ratisbonense	0	0	0.00321719	0	0
neisseria sicca	0.00973047	0.0127194	0	0.905395	0
neisseria spp.	0.00486523	0.0063597	4.05366	0	0.00664673
neisseria subflava	0	0	1.20966	0.00461936	0.00332336
nesterenkonia sp.	0	0.146273	0.00321719	0	0
nitrospirales	0	0	0.0128688	0	0.0265869
nocardioides	0	0.0063597	0.00321719	0.0138581	0
nocardiopsis	0	0	0	0	0
nostocales	0	0	0	0.00923873	0.00332336
novosphingobium spp.	0	0	0	0	0
okibacterium fritillariae	0	0	0	0	0
opitutus	0.0194609	0.0254388	0.00321719	3.27051	0.00332336
oscillatoriales	0	0	0	0	0
oscillospira spp.	0.00486523	0	0	0	0.00332336
paenibacillus	0.00486523	0	0.00321719	0	1.7215
paenibacillus chondroitinus	0	0	0	0	0
paenibacillus hordei	0.807629	0.0127194	0.00321719	0	0.531738
paenibacillus sp.	0	0	0	0	0
pantoea agglomerans	0.00486523	1.13203	0.0965158	0	0
pantoea ananatis	0.841685	0.063597	0.0257375	0.0184775	0.0598205
pantoea sp.	0	0	0	0	0
parabacteroides distasonis	0	0.0254388	0	0.00923873	0.00332336
paracoccus sp.	0	0	0.00321719	0	0.00664673
paracraurococcus	0	0	0	0	0
paracraurococcus spp.	0	0	0.00321719	0	0
pasteurella pneumotropica	0.0437871	0.063597	0.0128688	0.00923873	0.0598205
pasteurellaceae	0.0243262	0.0063597	0	0.0138581	0.00997009
pasteurellales	0.00486523	0	0.00321719	0	0.00332336
pedobacter sp.	0.00486523	0	0	0	0
peptococcus sp.	0	0	0.65309	0	0
peptoniphilaceae	0.00486523	0	0	0	0.00332336
peptoniphilus asaccharolyticus	0.00486523	0	0	0	0
peptostreptococcaceae	0	0	0	0	0
peptostreptococcus stomatis	0	0	0.228421	0	0
phenylobacterium sp.	0	0.0063597	0	0	0
phocaeicola spp.	0	0	0	0	0
photobacterium leiognathi	0	0	0	0	0
planctomycetaceae	0	0	0	0	0
planifilum spp.	0	0.171712	0	0	0
plantibacter sp.	0	0	0	0	0
polyangiaceae	0.345432	0	0	0	0
polyangium	0.00486523	0.0127194	0	0.854582	0
porphyromonadaceae	0.00973047	0.0254388	0.421452	0.00923873	0.0132935
prevotella aurantiaca	0.00486523	0	0.00321719	0.00923873	0.00332336
prevotella oris	0.00486523	0	0	0	0
prevotella shahii	0	0	1.32548	0	0
prevotella sp.	0	0.0063597	2.08796	0	0.00332336
prevotella spp.	0	0	0.00321719	0	0
promicromonospora aerolata	0.00486523	0	0	0.332594	0
propionibacteriaceae	0.00973047	0.362503	0.00321719	0.665188	0
propionibacterium acnes	7.08864	3.45332	1.31583	3.59848	1.20638
propionibacterium avidum	0	0	0	0	0
propionibacterium granulosum	0.189744	0.114475	0.00643439	0.00461936	0.00332336
propionibacterium spp.	0	0	0	0	0
prosthecomicrobium	0.00973047	0	0	0.794531	0
proteobacteria	0	0.0063597	0	0	0
proteus vulgaris	0	0	0	0	0
pseudoclavibacter	0	0	0	0	0
pseudoclavibacter sp.	0	0	0	0	0
pseudomonadaceae	0	0.0063597	0	0.00461936	0.00664673
pseudomonadales	0	0	0	0	0
pseudomonas	0	0	0	0	0.00332336
pseudomonas argentinensis	0	0	0	0	0
pseudomonas chlororaphis	0.00973047	0.0063597	0	0	0
pseudomonas oleovorans	0	0.0063597	0	0	0
pseudomonas protegens	0	0	0	0	0
pseudomonas putida	0.00973047	0.0190791	0.00965158	0.58204	0.00332336
pseudomonas rhizosphaerae	0	0	0.0739954	0	0
pseudomonas sp.	0.121631	0.120834	0.0611267	0.050813	0.0166168
pseudomonas spp.	2.76345	1.62172	0.176946	0.808389	0.0132935
pseudomonas stutzeri	0	0	0	0.00461936	0
pseudomonas syringae	0	0	0.556574	0	0
pseudomonas tolaasii	0.0437871	0.0317985	0.00321719	0.0230968	0.00332336
pseudomonas trivialis	0.30651	0.0063597	0	0.00461936	0
pseudomonas veronii	2.83643	1.86975	0.135122	0.632853	0.0299103
pseudomonas viridiflava	0	0.0063597	0	0	0
pseudonocardiaceae	0	0	0	0	0
ralstonia pickettii	0	0	0	0	0
rathayibacter tritici	0	0.0063597	0	0	0.00332336
rhodococcus	0	0	0	0	0
rhodococcus fascians	0	0.0063597	0	0.00461936	0
rhodococcus sp.	0	0	0.00643439	0	0
rhodococcus spp.	0.00486523	0.0127194	0	0	0.00997009
rhodospirillaceae	0	0.0063597	0	0	0
rhodospirillales	0	0	0	0	0
rosenbergiella nectarea	0	0	0	0	0
rothia mucilaginosa	0	0	0.260593	0	0
rubrobacter spp.	0	0	0	0	0
ruminococcaceae	0.00973047	0.0190791	0.00321719	0	0.00997009
selenomonas sp.	0	0	0	0.00461936	0
serratia sp.	0	0	0	0	0
shewanellaceae	0	0	0	0	0
shigella flexneri	1.24063	0.0063597	0.00643439	0	0.0132935
shuttleworthia satelles	0	0	0.00321719	0	0
solirubrobacteraceae	0	0	0	0.0184775	0
sphaerobacter	0	0	0	0	0
sphaerobacteraceae	0	0	0	0	0
sphaerobacterales	0	0	0	0.00461936	0
sphingobacteriales	0	0	0	0	0
sphingobacteriia	0	0	0.00321719	0	0
sphingobacterium	0.00973047	0.0127194	0	3.46452	0.00332336
sphingobacterium spp.	0	0	0	0	0
sphingomonas	0	0	0	0	0
sphingomonas aerolata	0	0	0	0	0
sphingomonas cynarae	0	0	0	0	0
sphingomonas echinoides	0	0	0	0	0
sphingomonas melonis	0	0	0	0	0
sphingomonas sp.	0	0.368863	0	0.00461936	0
sphingomonas spp.	0	0	0	0.355691	0
sphingomonas wittichii	0	0.0063597	0	0.914634	0.00332336
spirochaetaceae	0	0	0	0	0
spirochaetales	0	0	0	0	0
staphylococcaceae	0.00486523	0	0	0.00461936	0
staphylococcus aureus	0	0	0.405366	0	0
staphylococcus epidermidis	0.510849	0.0445179	2.29708	0.0415743	0.0199402
staphylococcus hominis	0.00486523	0.0063597	0	0	1.23961
staphylococcus lentus	0.00486523	0.0063597	0	0.00461936	0.00664673
staphylococcus nepalensis	0.00486523	0.0127194	0.00965158	0.0138581	0.0199402
staphylococcus pasteuri	0	0	0	0	0.00332336
staphylococcus saprophyticus	0.413545	0.616891	0.173728	0.221729	0.432037
staphylococcus sp.	0	0	0	0.00461936	0.00664673
staphylococcus spp.	0	0.0063597	0.501882	0.905395	0
staphylococcus succinus	0	0.0063597	0	0	0
stenotrophomonas maltophilia	0	0.0127194	0.00643439	0.00923873	4.84879
stenotrophomonas rhizophila	0	0	0	0	0
stenotrophomonas spp.	0	0	0	0.0369549	0
streptococcaceae	0	0	0	0	0
streptococcus acidominimus	0.0145957	0.0127194	0.00965158	0.0138581	0.0299103
streptococcus cristatus	0	0	0.881511	0	0
streptococcus gordonii	0	0	0	0	0
streptococcus infantis	0.0145957	0	3.4424	0	0.00997009
streptococcus mitis	0	0	0	0	0
streptococcus oralis	0	0	0	0	0
streptococcus salivarius	0.0145957	0.0063597	0	0.0138581	0.00332336
streptococcus sanguinis	0	0	0.115819	0	0.00664673
streptococcus sp.	0	0	0.144774	0	0
streptococcus spp.	0.0145957	0.0317985	0.0257375	0.0277162	0.0332336
streptococcus thermophilus	2.78778	15.1361	4.13409	15.036	3.86507
streptomycetaceae	0	0	0	0	0
sutterellaceae	0	0	0	0	0
synechococcus sp.	0	0	0	0	0
tepidimonas taiwanensis	0	0	0	0.0646711	0
tepidiphilus spp.	0	0	0	0.0184775	0
tsukamurellaceae	0	0.0063597	0.00321719	0	0.0299103
turicibacter spp.	0	0	0	0	0
veillonella parvula	0.00486523	0.0127194	2.11691	0.00461936	0.00997009
veillonella tobetsuensis	0	0	0.257375	0	0
weissella cibaria	0	0.0127194	0	0.157058	0.00332336
weissella hellenica	0	0	0	0	0
xanthomonadaceae	0	0	0	0	0
xanthomonas melonis	0	0.839481	0	0	0
