# Supplementary material for: Neonatal-derived IL-17 producing dermal γδ T cells are required to prevent spontaneous atopic dermatitis
Source: eLife. 2020 Feb 17;9:e51188. doi: 10.7554/eLife.51188 (PMC7025821; doi:10.7554/eLife.51188)
Supplement: Figure 4—source data 1. — Values indicate percent abundance per sample (total = 100). [file elife-51188-fig4-data1.xlsx]

## Sheet: 3 mo
Source Data for Figure 4A. Values indicate percent abundance in each sample.
Species	LMC 1	LMC 2	Sox13-/- 1	Sox13-/- 2	Sox13-/- 3	Sox13-/- 4
abiotrophia defectiva	0	0	0	0	0	0
acetobacter aceti	0	0	0.00464792	0	0	0
acetobacteraceae	0.0847188	0	0	0	0	0
acidobacteriaceae	0	0	0	0	0	0
acidobacterium	0	0	0	0.00482602	0	0.00324433
acidovorax facilis	0	0	0	0	0	0
acidovorax spp.	0	0	0	0	0	0
acinetobacter lwoffii	0	0	0	0	0	0
acinetobacter sp.	0	0	0	0	0.0106975	1.08036
acinetobacter spp.	0.00529493	0	0	0	0	0
actinobacillus	0	0.00381127	0.00464792	0	0	0
actinobacteria	0	0	0	0	0.0106975	0
actinomyces odontolyticus	0	0	0	0	0	0
actinomyces sp.	0	0	0	0	0	0
actinomycetaceae	0	0.0343014	0	0	0	0
actinomycetales	0	0	0	0	0.021395	0
actinoplanes spp.	0	0	0	0	0	0
aeribacillus geobacillus pallidus	0	0	0	0.00482602	0	0
aerococcus urinaeequi	0	0	0	0	0	0
aeromonas	0	0	0	0	0	0
aggregatibacter segnis	0.00529493	0	0	0	0	0
aggregatibacter sp.	0	0	0	0	0	0.00324433
agrobacterium tumefaciens	0	0.00381127	0	0.00482602	0	1.27178
agrococcus jenensis	0	0	0	0	0	0
agrococcus versicolor	0	0	0.418313	0	0	0
agromyces spp.	0	0	0	0	0	0
alcaligenes faecalis	0	0.00381127	0	0	0	0
alkalibacterium	0	0.00381127	0	0	0	0
alteromonadales	0	0	0	0	0	0
anaerococcus	0	0.00381127	0.00929584	0.00482602	0.021395	0
anaerococcus hydrogenalis	2.66864	0	0.00464792	0.00482602	0	0
anaerococcus octavius	0	0	0	0	0.727428	0
anaerococcus prevotii	0.00529493	0	0.00464792	0.0193041	0.021395	0
anaerococcus spp.	0	0	0.0139438	0	0	0.00324433
anaeromyxobacteraceae	0	0	0	0	0	0.489894
anaerosalibacter bizertensis	0.0794239	0	0	0	0.385109	0
anaerotruncus colihominis	0	0	0	0	0	0
anoxybacillus gonensis	0	0	0	0	0	0
anoxybacillus kestanbolensis	0	0	0	0	0.021395	0
aquabacterium spp.	0	0	0	0	0	0
armatimonadales	0	0	0	0	0	0
atopobium rimae	0	0	0	0	0	0
atopostipes	8.49836	0.00381127	0	0.0289561	0.0320924	0
atopostipes sp.	4.40008	0.00762253	0.00464792	0.00965204	0.021395	0
bacillaceae	0	0	0	0	0	0
bacillales	0.074129	1.53213	0.971415	0.110999	0.641849	0.0908413
bacilli	0.00529493	0.00381127	0	0.00482602	0	0
bacillus pumilus	0	0	0	0	0.0106975	0
bacillus sp.	0	0	0	0	0.0106975	0
bacillus thermoamylovorans	0	0	0	0	0	0.00324433
bacteroidaceae	0	0	0	0	0	0
bacteroidales	0.074129	1.555	1.63142	0.289561	0.845101	0.856503
bacteroides acidifaciens	0.0211797	0.586935	2.5796	0.0193041	0.0534874	1.61243
bacteroides acidofaciens	0.423594	0.00381127	1.18522	0.00965204	0.0106975	0.00324433
bacteroides sp.	0.00529493	0	0	0	0	0
bacteroides spp.	0	0	0	0	0	0
bacteroides uniformis	0.725405	5.79312	1.76156	0.0434342	0.0855798	1.36262
bacteroidetes	0.0158848	0.00762253	2.95608	2.20067	0.0320924	2.23534
bacteroidia	0	0.0152451	1.56635	1.94489	0.855798	3.03345
barnesiella	0	0	0.00464792	0.00482602	0	0
barnesiella spp.	2.91221	0.647915	2.69115	2.49988	0.0427899	1.55728
bergeyella sp.	0	0.0800366	0	0	0	0
bergeyella spp.	0	0	0	0.00482602	0.0106975	0
betaproteobacteria	0	0	0	0	0	0
bifidobacteriaceae	0	0	0.00464792	0	0	0.00324433
bifidobacterium animalis	0.0105899	0.0190563	0.0278875	0.863858	0.021395	0
bifidobacterium breve	0.0370645	0	0.00929584	0.00482602	0.021395	0.0129773
bifidobacterium kashiwanohense	0	0	0.00464792	0	0	0
blastocatellaceae	0	0	0	0	0.0106975	0
blastococcus aggregatus	0.0105899	0.00381127	0	0.00482602	0	0
blastococcus saxobsidens	0.00529493	0	0	0	0	0
bordetella avium	0	0	0	0	0	0
bradyrhizobium elkanii	1.72615	0.00762253	0.934232	0.0144781	0	0.00648866
bradyrhizobium spp.	0.00529493	0	0.00464792	0	0	0
brevundimonas sp.	0	0	0	0	0	0
buchnera aphidicola	0	0	0	0	0	0
burkholderia	0.0211797	0	0	0	0	0
burkholderia spp.	0	0	0	0	0	0
burkholderia vietnamiensis	0	0.00762253	0	0	1.86136	0
burkholderiales	0	0	0	0	0	0
caldibacillus geobacillus debilis	0	0	0	0	0	0
caldimonas taiwanensis	0.00529493	0	0	0	0	0
candidatus odyssella	0	0	0	0	0	0
candidatus phytoplasma sugarcane phytoplasma (uncharacterized)	0.00529493	0.00762253	0	0.00965204	0.139067	0
candidatus saccharibacteria	0	0	0	0	0	0
capnocytophaga gingivalis	0	0	0	0	0	0
capnocytophaga granulosa	0	0	0	0	0	0
capnocytophaga sputigena	0	0	0	0.00482602	0	0
carnobacterium viridans	0	0	0	0	0	0
catonella morbi	0	0	0	0	0	0
caulobacter sp.	0	0	0	0	0	0
cellvibrio sp.	0	0	0	0	0	0
cetobacterium spp.	0	0.00381127	0.330002	0	0	0
chitinophagaceae	0	0	0	0.00482602	0	0
chloroflexaceae	0.00529493	0.00381127	0	0	0	0
chryseobacterium sp.	0	0	0	0	0	0
chryseobacterium wanjuense	0.00529493	0	0	0	0	0
clostridia	2.63158	1.11289	2.82129	0.0579123	2.22507	0.626156
clostridiaceae	5.87737	5.16808	6.07483	0.0675643	1.2623	7.25432
clostridiales	7.50821	4.49729	13.809	0.154433	1.2837	14.7812
clostridium	0.767764	2.25246	1.90565	0.0144781	1.03766	0.168705
clostridium perfringens	1.28667	0.00381127	0	0	0	0
clostridium sp.	0	2.77079	1.65931	0.0241301	1.03766	3.28002
cohnella sp.	0	0	0	0	0	0
collinsella aerofaciens	0	0	0	0	0	0
comamonas sp.	0	0	0	0	0	0
coriobacteriaceae	0.00529493	0	0.464792	0	0	1.07063
coriobacteriales	0.00529493	0.00762253	0	0	0.0106975	0
corynebacteriaceae	0.0105899	0.00381127	0.00929584	0	0.0106975	0.00324433
corynebacterium	1.01663	0.00381127	0	0.00482602	0	0.00648866
corynebacterium freneyi	0	0	0	0	0	0
corynebacterium glucuronolyticum	0.00529493	0.00381127	0	2.75566	0.0106975	0
corynebacterium mastitidis	2.87515	3.46825	1.63142	25.0036	13.3077	9.2139
corynebacterium matruchotii	0.00529493	1.8942	0.00464792	0.00965204	0.021395	0
corynebacterium pseudodiphtheriticum	0.00529493	0	0.00464792	0	0.021395	0.00324433
corynebacterium pseudogenitalium	0	0.00381127	0	1.22581	0.0106975	0.00324433
corynebacterium riegelii	0	0	0.00464792	0.00482602	0	0
corynebacterium sp.	0	0	0	0	0	0
corynebacterium spp.	1.81616	1.90182	1.06437	1.13894	0.0641849	0.019466
corynebacterium tuberculostearicum	0.0317696	0.00381127	0.171973	0.0144781	0.0106975	0.00973299
cupriavidus metallidurans	0	0	0.58099	0	0	0
curtobacterium flaccumfaciens	0.0105899	0	0	0	4.15062	0.00324433
curtobacterium pusillum	0.00529493	0.00381127	0.00464792	0.00482602	0.0106975	0
cyanobacteria	0	0	0	0	0	0
cytophagaceae	0	0	0	0	0.0427899	0
cytophagales	0.00529493	0	0	0	0.0106975	0
deferribacteraceae	0.00529493	0.00762253	0.00929584	0.0144781	0.0427899	0.00648866
deferribacterales	0	0.00381127	0.00929584	0.00482602	0.0106975	0.00324433
deinococcus geothermalis	0	0	0.501975	0	0	0
delftia sp.	0	0	0	0.00965204	0	0.00324433
delftia spp.	0.0423594	2.56498	0.934232	1.68911	0.994865	2.66684
deltaproteobacteria	0	0	0	0	0	0
desulfobacterales	0	0	0	0	0	0
desulfovibrionaceae	0	0	0.00464792	0	0	0
desulfovibrionales	0	0	0.878457	0.00482602	0	0
desulfuromonadales	0	0	0	0	0	0
devosia crocina	0	0	0	0	0	0
devosia spp.	0	1.90944	0	0.00482602	0	0
dialister invisus	0	0	0.488032	0	0	0
dolosigranulum spp.	0	0	0	0	0	0
duganella zoogloeoides	0.00529493	0.00381127	0.00464792	0.00482602	0.0106975	0.892191
empedobacter	0.00529493	0	0	0	0	0
enhydrobacter aerosaccus	0	0	0	0	0	0
enterobacter hormaechei	0	0	0	0	1.02696	0.00648866
enterobacter ludwigii	0	0	0	0	0	0
enterobacter sp.	0	0.674594	0	0.00482602	0	0
enterobacteriales	0	0	0	0	0.021395	0
enterococcus casseliflavus	0	0	0	0	0	0
enterococcus cecorum	0	0	0	0	0	0
enterococcus gallinarum	0.476543	0.343014	0.460144	0.641861	1.16602	0.266035
enterococcus mundtii	0	0	0	0	0	0
enterorhabdus caecimuris	1.22313	0	0	0	0	0
erysipelatoclostridium clostridium cocleatum	0	0	0	0	0	0
erysipelotrichia	0.00529493	0.00381127	0.00464792	0.00482602	0.0106975	0
escherichia coli	0	0.00762253	0	0	0	0
eubacterium	0	0	0	0	0	0
eubacterium rectale	0	0	0	0	0.0106975	0.00324433
eubacterium sp.	0	0	0	0	0.0106975	0
fimbriimonadales	0	0	0	0	0	0
firmicutes	0	0	0	0	0	0
flavobacteriaceae	0	0	0.00464792	0	0.0106975	0.00324433
flavobacterium	0	0	0	0	0	0
frigoribacterium faeni	0	0	0	0	0	0
fusobacteriaceae	0	0	0.232396	0	0	0.00324433
fusobacteriales	0	0	0	0	0	0
fusobacterium necrophorum	0	0	0	0	0	0
fusobacterium nucleatum	0	0	0	0.00965204	0.0106975	0.00648866
fusobacterium periodonticum	0.0105899	0	0.00929584	0	0	0
fusobacterium spp.	0	0	0	0	0	0
galbitalea	0	0	0	0.00482602	0.770218	0
gammaproteobacteria	0	0	0	0	0	0
gemella haemolysans	0	0	0	0.00482602	0	0
gemella morbillorum	0	0	0	0	0	0
gemella sanguinis	0	0.00381127	0	0.00482602	0	0
gemmatimonadaceae	0	0	0	0	0	0.00324433
gemmatimonadales	0	0	0	0	0	0
geobacillus	0	0	0	0	0	0
geobacillus bacillus sp.	0	0	0	0	0	0
geobacillus stearothermophilus	0	0	0	1.57811	0	0
gloeobacteraceae	0.00529493	0.30109	0	0	0	0.00324433
gordonia terrae	0.00529493	0	0	0	0	0
granulicatella adiacens	0	0	0.00464792	0	0	0
granulicatella elegans	0	0	0.00464792	0.00482602	0	0
granulicatella paradiacens	0	0	0.00464792	0	0	0
haemophilus parainfluenzae	1.59907	0.00762253	0.55775	0.0289561	0.0106975	0.00324433
haemophilus sputorum	0	0	0	0	0	0.00324433
halolactibacillus halophilus	0	0	0	0	0.0106975	0
halospirulina sp.	0	0	0	0	0	0
helicobacter ganmani	5.96209	1.10908	17.8713	0.361952	1.54044	8.91542
helicobacter hepaticus	0.0688341	0.00381127	0.00464792	1.13894	0.513479	3.60445
herbaspirillum huttiense	0	0	0	0	0	0
hydrogenophaga spp.	0	0	0	0	0	0
hydrogenophilus hirschii	1.28667	0	0	0.00965204	0.363714	0
hymenobacter	0	0	0	0.00965204	0.353017	0
hymenobacter ginsengisoli	0	0	0	0	0	0
hymenobacter spp.	0	0	0.237044	0	0	0.00324433
janthinobacterium sp.	0	0	0	0	0	0
jeotgalicoccus sp.	0.00529493	0	0	0	0.459991	0
kaistia adipata	0.00529493	0	0.00929584	0.00482602	0.0106975	0.00324433
kaistobacter spp.	1.50905	0	0	0	0	0
klebsiella oxytoca	0	0	0	0	0	0
kocuria rhizophila	0	0	0	0.00482602	0	0
kosakonia enterobacter cowanii	0.937202	0	0	0	0.0106975	0
kurthia gibsonii	0	0	0	0.00482602	1.16602	0
kytococcus sedentarius	0	0	0	0.00482602	0	0
lachnoanaerobaculum eubacterium saburreum	0	0	0	0.00482602	0	0
lachnospiraceae	1.12782	0.0152451	1.81734	3.36856	1.2516	0
lactobacillaceae	0	0	0	0	0.139067	0
lactobacillales	0.00529493	0	0.00464792	0	0.459991	0
lactobacillus acidophilus	0.0264746	0.666972	0.599582	14.1209	0	0.00973299
lactobacillus curvatus	0.831304	0	0	0	0	0
lactobacillus gallinarum	0	0.0114338	1.37578	0.00965204	0.021395	0.00973299
lactobacillus helveticus	0	0	0.00464792	0	0	0
lactobacillus johnsonii	0	0	0	0.00482602	0	0
lactobacillus murinus	0.0211797	0.00381127	0.920288	0.00482602	0	1.2004
lactobacillus paracasei	0.0158848	0.0114338	0.00929584	0.0241301	0.962773	0.830549
lactobacillus plantarum	0.0158848	0	0	0.00482602	0.021395	0.00973299
lactobacillus salivarius	0.0105899	0	0	0.00965204	0.0106975	1.98229
lactobacillus zeae	0	0.00381127	0.00464792	0	0.0106975	1.57026
lactococcus lactis	0	0	0	0	0	0
lautropia spp.	0	0	0.190565	0	0	0
legionellales	0	0	0	0	0.406504	0
leifsonia	0	0	0	0	0	0
leptolyngbyaceae	0	0	0	0	0	0
leptotrichia sp.	0	0	0	0	0.021395	0
leuconostoc carnosum	0	0	0	0	0	0
marinococcus sp.	0	0	0.283523	0	0	0
marmoricola sp.	0.00529493	0	0	0	0	0
massilia spp.	0	1.04048	0	0.00482602	1.10184	0.00324433
massilia timonae	0	0.00762253	0	0	0.88789	1.16796
methylobacterium adhaesivum	0	0	0	0	0	0
methylobacterium sp.	0	0	0	0	1.32649	0
microbacteriaceae	0	0	0.0278875	0	0.0106975	0
microbacterium sp.	0	0	0.106902	0	0.0106975	0
microbacterium spp.	0	0.00381127	0.00464792	0	0	0
microbacterium testaceum	0	0	0	0	0	0
microchaetaceae	0	0	0	0	0	0
micrococcus luteus	0	0.00381127	0.00929584	0.00482602	0	0
micrococcus sp.	0	0	0	0	0	0
microvirga spp.	0	0	0.00464792	0.00965204	0	0
modestobacter sp.	0	0	0	0	0.395807	0
mucispirillum	0.111193	0.0647915	0.660005	0.115825	0.21395	0.0356876
mucispirillum sp.	2.68982	0.0686028	1.25029	0.144781	0.267437	0.0746196
mycobacteriaceae	0	0	0	0	0.0320924	0
mycobacterium ratisbonense	0	0	0	0	0	0
neisseria sicca	0	0	0.00464792	0	0.0106975	0
neisseria spp.	0	0.00381127	0.00464792	0.00482602	0	0
neisseria subflava	0.0105899	0.00381127	0.00929584	0	0	0.00324433
nesterenkonia sp.	0	0	0	0	0	0
nitrospirales	0	0	0	0	0	0
nocardioides	0	0	0	0	0	0.00648866
nocardiopsis	0	0	0	0	0	0
nostocales	0	0	0	0	0	0
novosphingobium spp.	0	0	0	0	0.813008	0
okibacterium fritillariae	0	0	0	0	0	0
opitutus	0	0	0.00464792	0.00965204	0	0.00648866
oscillatoriales	0.00529493	0.00381127	0	0	0.0106975	0
oscillospira spp.	0	0.00381127	0.483384	0.00965204	0.652546	0
paenibacillus	0	0.00381127	0	0.00482602	0	0
paenibacillus chondroitinus	0	0	0	0.00482602	0	0
paenibacillus hordei	0	0	0	0	0.299529	0
paenibacillus sp.	0	0.00381127	0	0	0.984168	0
pantoea agglomerans	0.00529493	0.0990929	0.0697188	0	0.588361	0
pantoea ananatis	1.86381	0.426862	0.664653	2.52401	3.47668	0.0259546
pantoea sp.	0	0	0	0	0	0
parabacteroides distasonis	0	0	0.409017	0	0.021395	2.9491
paracoccus sp.	0	0	0	0	0.0106975	0
paracraurococcus	0	0.00381127	0	0	0.93068	0
paracraurococcus spp.	0	0	0	0	0	0
pasteurella pneumotropica	0.0582442	18.9687	1.1248	1.38989	0.267437	0.0227103
pasteurellaceae	1.5673	4.4325	2.15199	8.00637	0.0748823	0.00973299
pasteurellales	0	0	0	0	0	0
pedobacter sp.	0	0	0.00464792	0	0	0
peptococcus sp.	0	0	0	0.00482602	0	0
peptoniphilaceae	0.00529493	0	0.00929584	2.07036	0.0106975	0
peptoniphilus asaccharolyticus	0	0	0	0.00482602	0	0.00324433
peptostreptococcaceae	0	0.00381127	0	0	0	0
peptostreptococcus stomatis	0	0	0	0	0.0106975	0
phenylobacterium sp.	0	0	0	0	0	0
phocaeicola spp.	0	0	0	0	0	0
photobacterium leiognathi	0	0.369693	0	0	0	0
planctomycetaceae	0	0	0	0	0	0
planifilum spp.	0	0	0	0	0	0
plantibacter sp.	0.391825	0.00381127	0	0	0	0
polyangiaceae	0	0	0	0	0	0
polyangium	0.00529493	0	0	0	0	0
porphyromonadaceae	2.02266	0.00762253	1.85917	1.08103	1.66881	3.01398
prevotella aurantiaca	0	3.37297	0.00464792	0.00482602	0.021395	0.00324433
prevotella oris	0	0	0	0	0	0
prevotella shahii	0	0	0	0.00965204	0	0.00324433
prevotella sp.	0	0	0	0.00482602	0	0
prevotella spp.	0	0	0	0.00482602	0	0
promicromonospora aerolata	0	0	0	0	0	0
propionibacteriaceae	0.550672	0.106715	0	0	0	0.00324433
propionibacterium acnes	9.65265	4.15047	2.0172	5.70436	1.55113	2.43325
propionibacterium avidum	0	0	0	0	0	0
propionibacterium granulosum	0.794239	0	0.00464792	0	0	0
propionibacterium spp.	0	0	0	0	0	0
prosthecomicrobium	0	0	0	0	0	0.00324433
proteobacteria	0.00529493	0	0	0	0	0
proteus vulgaris	0.7307	0.00381127	0	0	0	0
pseudoclavibacter	0	0	0	0	0	0
pseudoclavibacter sp.	0	0	0	0	0	0
pseudomonadaceae	0.0158848	0	0	0.00482602	0	0
pseudomonadales	0	0	0	0	0	0
pseudomonas	0	0	0.00464792	0	0	0
pseudomonas argentinensis	0	0	0.571694	0	0.139067	0
pseudomonas chlororaphis	0	0.0152451	0	0.00482602	0.0106975	0.00973299
pseudomonas oleovorans	0.688341	0	0	0	0.0748823	0
pseudomonas protegens	0	0	0	0	0	0
pseudomonas putida	0.0105899	1.54356	0	0.0241301	1.09114	1.17445
pseudomonas rhizosphaerae	0	0	0	0	0	0
pseudomonas sp.	0.0529493	0.0724141	0.0511271	0.0965204	0.139067	0.178438
pseudomonas spp.	0.291221	0.697462	1.18522	4.00077	0.962773	3.70827
pseudomonas stutzeri	0	0	0	0	0	0
pseudomonas syringae	0	0.00381127	0	0	0.88789	0
pseudomonas tolaasii	0.00529493	0.00762253	0.0278875	0.154433	0.0106975	1.2004
pseudomonas trivialis	0	0.00381127	0	0.00482602	0	0.645622
pseudomonas veronii	0.35476	0.674594	0.910992	1.9835	0.919983	3.79911
pseudomonas viridiflava	2.37213	0.00381127	0	0	0.021395	0
pseudonocardiaceae	0	0	0	0	0.449294	0
ralstonia pickettii	0	0	0.00464792	0.226823	1.06975	0
rathayibacter tritici	0	0	0.00464792	0	0	0
rhodococcus	0	0	0	0	0	0
rhodococcus fascians	0	0.00381127	0.00464792	0.00482602	0	0.580735
rhodococcus sp.	0	0.613614	0	0	0.0106975	0
rhodococcus spp.	0	0.00762253	0.00929584	0.00482602	0.0106975	0.00324433
rhodospirillaceae	0	0	0	0	0	0
rhodospirillales	0	0	0	0	0	0
rosenbergiella nectarea	0	0	1.15733	0	0.331622	0
rothia mucilaginosa	0	0	0	0	0	0
rubrobacter spp.	0	0	0	0	0	0
ruminococcaceae	2.64217	0	2.50058	0.00482602	0.0106975	0.00324433
selenomonas sp.	0	0	0	0	0	0
serratia sp.	0.00529493	0	0	0.00482602	0.88789	0
shewanellaceae	0	0.442107	0	0	0	0.00324433
shigella flexneri	2.15504	0.00381127	0.0511271	0.00965204	0	0.0227103
shuttleworthia satelles	0	0	0.00464792	0	0	0
solirubrobacteraceae	0	0	0	0	0	0
sphaerobacter	0	0	0	0	0	0
sphaerobacteraceae	0	0	0	0	0	0
sphaerobacterales	0	0	0	0.00482602	0	0
sphingobacteriales	0	0	0	0	0	0
sphingobacteriia	0	0	0	0	0.545571	0
sphingobacterium	0	0.00381127	0.00464792	0.00482602	0	0.00648866
sphingobacterium spp.	0	0	0	0	0.791613	0
sphingomonas	0	0	0	0	0	0.00324433
sphingomonas aerolata	0	0	0	0	0.0106975	0
sphingomonas cynarae	0	0	0	0	0	0
sphingomonas echinoides	0	0	0	0	0	0
sphingomonas melonis	0	0	0	0	0	0
sphingomonas sp.	0	0	0	0	0.620454	0
sphingomonas spp.	0.0317696	0.514521	0	0	0.0106975	0
sphingomonas wittichii	0	0	0	0	0.0106975	0
spirochaetaceae	0	0	0	0.00482602	0	0
spirochaetales	0	0	0	0	0	0
staphylococcaceae	0	0	0	0	0	0.00324433
staphylococcus aureus	0	0	0.00464792	0.00482602	0	0
staphylococcus epidermidis	0.921317	0.17913	0.0325354	1.13894	1.17672	0.0259546
staphylococcus hominis	0	0	0	0	0	0
staphylococcus lentus	0	0.00381127	0	0	1.92555	0
staphylococcus nepalensis	2.05973	0.0266789	0.0139438	0.0289561	1.20881	1.2296
staphylococcus pasteuri	0	0	0	0	0	0
staphylococcus saprophyticus	5.51731	8.41146	0.655357	6.25452	18.7099	0.262791
staphylococcus sp.	0.0582442	0.0495465	0	0.0530862	4.34318	0
staphylococcus spp.	0.111193	0	0.00464792	0	0.021395	0
staphylococcus succinus	0	1.20436	0	0	0.449294	0.00648866
stenotrophomonas maltophilia	0.0264746	0.00381127	0.00464792	0.0144781	0.0641849	0.00324433
stenotrophomonas rhizophila	0	0	0	0	0.738126	0
stenotrophomonas spp.	0	0	0	0	0	0
streptococcaceae	0	0	0.00929584	0.00482602	0	0.00324433
streptococcus acidominimus	0.0317696	2.91181	1.05043	2.32132	0.0320924	0.00648866
streptococcus cristatus	0	0	0	0.00965204	0	0.00324433
streptococcus gordonii	0	0	0.00464792	0	0	0
streptococcus infantis	0.0105899	0	0	0.00482602	0	0.00324433
streptococcus mitis	0	0	0.539159	0	0	0
streptococcus oralis	0	0	0.49268	0	0	0
streptococcus salivarius	0	0.194375	0	0	0.0106975	0.00324433
streptococcus sanguinis	0.00529493	0	0.864513	0.554993	0	0
streptococcus sp.	0	0.00381127	0	0	0.0106975	0
streptococcus spp.	0.0211797	3.35391	0.0232396	0.0530862	1.05905	3.84129
streptococcus thermophilus	0.714815	4.71835	3.91355	0.173737	3.27343	1.41453
streptomycetaceae	0	0	0	0	0	0
sutterellaceae	0	0	0	0	0	0
synechococcus sp.	0	0	0	0	0	0
tepidimonas taiwanensis	0	0	0	0	0	0
tepidiphilus spp.	0	0	0	0	0	0
tsukamurellaceae	0	0	0	0	0	0
turicibacter spp.	0	0	0	0	0	0
veillonella parvula	0.00529493	0.00381127	0.00929584	0	0	0
veillonella tobetsuensis	0	0	0.00464792	0	0	0
weissella cibaria	0	0.0609803	0	0	0	0
weissella hellenica	0.492428	0	0.204508	0	0.0106975	0
xanthomonadaceae	0	0	0	0	0	0
xanthomonas melonis	0	0	0	0	0	0

## Sheet: 6 mo
Source Data for Figure 4A. Values indicate percent abundance in each sample.
Species	LMC 1	LMC 2	LMC 3	Sox13-/- 1	Sox13-/- 2	Sox13-/- 3
abiotrophia defectiva	0	0	0	0	0.469381	0
acetobacter aceti	0	0.00382205	1.6195	0.00229447	0.0109158	0
acetobacteraceae	0.00293841	0.248433	0	0	0	0.00197683
acidobacteriaceae	0	0	0	0.00458895	0	0.0869806
acidobacterium	0	0	0	0	0	0.0889574
acidovorax facilis	0	0	0	0	0.0873267	0
acidovorax spp.	0	0.00382205	0	0	0	0
acinetobacter lwoffii	0	0	0	0	0.120074	0.00197683
acinetobacter sp.	0	0	0.00404875	0	0	0
acinetobacter spp.	0.00293841	0.14906	0.00404875	0	0	0
actinobacillus	0	0.00382205	0	0	0	0
actinobacteria	0	0.0267543	0	0.00229447	0	0.00593049
actinomyces odontolyticus	0	0	0	0	0	0
actinomyces sp.	0	0	0	0	0	0
actinomycetaceae	0	0	0	0.00458895	0.00545792	0.0177915
actinomycetales	0	0.00382205	0.00404875	0	0	0.00197683
actinoplanes spp.	0	0	0.00404875	0.00229447	0	0
aeribacillus geobacillus pallidus	0	0	0	0	0.00545792	0.00197683
aerococcus urinaeequi	0.0117536	0	0.00404875	0	0.120074	0
aeromonas	0	0	0	0	0	0.00593049
aggregatibacter segnis	0	0	0	0	0	0
aggregatibacter sp.	0	0	0	0.00229447	0	0
agrobacterium tumefaciens	0	0	0	0.00229447	0	0
agrococcus jenensis	0	0	0	0	0.191027	0
agrococcus versicolor	0	0	0	0	0	0.00197683
agromyces spp.	0.220381	0	0	0	0	0.00197683
alcaligenes faecalis	0	0.0114661	0.00404875	0	0	0
alkalibacterium	0	0	0	0	0	0
alteromonadales	0	0	0	0	0.0109158	0.023722
anaerococcus	0.00293841	0.00764409	0	0	0.0109158	0
anaerococcus hydrogenalis	0.00293841	0.00382205	0	0.00229447	0	0
anaerococcus octavius	0	0	0	0	0	0
anaerococcus prevotii	0	0	0	0.00229447	0	0.00395366
anaerococcus spp.	0	0	0.00809749	0.00458895	0.611287	0.00395366
anaeromyxobacteraceae	0	0	0	0	0	0.00197683
anaerosalibacter bizertensis	0	0	0	0	0	0
anaerotruncus colihominis	0	0	0	0	0.114616	0
anoxybacillus gonensis	0.00293841	0	0	0	0	0.00197683
anoxybacillus kestanbolensis	0.00293841	0	0	0.00229447	0	0.00197683
aquabacterium spp.	0	0	0	0	0	0
armatimonadales	0	0	0	0	0.196485	0
atopobium rimae	0	0	0.00404875	0	0.00545792	0.00197683
atopostipes	0.0146921	0.00764409	0.00809749	0.00458895	0.0109158	0.00988416
atopostipes sp.	0.00881523	0	0	0.00229447	0.0109158	0.00395366
bacillaceae	0.00293841	0.779697	0	0.00229447	0.00545792	0
bacillales	1.19006	5.28589	0.0728774	32.5953	0.185569	6.73902
bacilli	0	0.00382205	0	0	0	0
bacillus pumilus	0.00293841	0.588595	0	0	0.00545792	0
bacillus sp.	0	0	0	0.00229447	0	0
bacillus thermoamylovorans	0.170428	0	0.587068	0	0	0.00197683
bacteroidaceae	0	0	0	0	0.0327475	0
bacteroidales	3.19111	1.29567	2.87461	0.00458895	0.649492	0.12454
bacteroides acidifaciens	4.00212	0.00382205	1.94745	0.117018	0.152822	0.00197683
bacteroides acidofaciens	0.0558298	0	2.15393	0.00229447	0	0.00395366
bacteroides sp.	0.969676	0	0.00404875	0	0	0
bacteroides spp.	0	0	0	0	0.65495	0
bacteroides uniformis	7.60461	2.00657	0.0283412	0.0917789	0	0.0177915
bacteroidetes	1.78655	0	0.0283412	0.00229447	0.00545792	0.00197683
bacteroidia	1.30759	0.00764409	0.530386	0.0206503	0.0163738	0.0197683
barnesiella	0.00293841	0	0	0	0	0
barnesiella spp.	1.37224	0.0114661	0.00404875	0.172085	0.0109158	0.011861
bergeyella sp.	0.108721	0.451001	0	0	0.120074	0.00197683
bergeyella spp.	0.00293841	0	0.00404875	0	0.00545792	0
betaproteobacteria	0.0558298	0	0	0	0	0
bifidobacteriaceae	0	0	0.00809749	0	0.00545792	0.00197683
bifidobacterium animalis	0.00881523	0.0229323	0.0242925	0.0137668	0.0873267	0.011861
bifidobacterium breve	0.00881523	0.00764409	0.00809749	0.00458895	0.00545792	0.00593049
bifidobacterium kashiwanohense	0	0	0	0	0.382054	0
blastocatellaceae	0	0	0	0	0.00545792	0.316293
blastococcus aggregatus	0.00293841	0	0	0.00229447	0	0.00197683
blastococcus saxobsidens	0	0	0	0.00229447	0.212859	0.00197683
bordetella avium	0.00293841	0.798808	0	0.00229447	0	0
bradyrhizobium elkanii	0.0117536	0.00764409	2.93534	0.00458895	0.0109158	0.0731428
bradyrhizobium spp.	0	0	0.0242925	0	0	0
brevundimonas sp.	0	0	0	0	0	0
buchnera aphidicola	0	0	0	0	0.0272896	0
burkholderia	0	0	0	0	0	0
burkholderia spp.	0.00293841	0	0.00404875	0	0	0
burkholderia vietnamiensis	0	0	0	0	0	0
burkholderiales	0	0	0	0	0	0
caldibacillus geobacillus debilis	0	0	0	0	0	0
caldimonas taiwanensis	0	0	0	0	0	0
candidatus odyssella	0	0.00382205	0	0	0	0
candidatus phytoplasma sugarcane phytoplasma (uncharacterized)	0	0.00382205	0.00404875	0	0.00545792	0
candidatus saccharibacteria	0	0	0	0	0	0.0197683
capnocytophaga gingivalis	0.00293841	0.00382205	0	0	0.00545792	0
capnocytophaga granulosa	0	0	0	0	0	0
capnocytophaga sputigena	0	0	0.00404875	0	0	0
carnobacterium viridans	0	0.0114661	0	0	0	0
catonella morbi	0	0	0	0	0.00545792	0
caulobacter sp.	0.00293841	0	0	0	0	0
cellvibrio sp.	0	0	0	0	0	0
cetobacterium spp.	0	0	0	0	0	0
chitinophagaceae	0	0.351628	0	0	0	0.00197683
chloroflexaceae	0	0	0	0	0	0.00197683
chryseobacterium sp.	0.478961	0	0	0	0	0
chryseobacterium wanjuense	0	0	0	0	0	0.00197683
clostridia	1.83357	3.87938	1.23487	0.0940734	0.534876	0.0968647
clostridiaceae	2.86201	6.9179	2.76529	0.401533	0.376596	0.0296525
clostridiales	4.18724	5.7216	9.385	0.208797	1.12433	0.0988416
clostridium	4.48108	5.38144	0.0526337	0.21568	1.61554	0.177915
clostridium perfringens	0.00293841	0.00382205	0	0	0	0.00197683
clostridium sp.	0.699342	0.00382205	4.40099	0.0367116	0.469381	0.104772
cohnella sp.	0	0	0	0	0.0764109	0
collinsella aerofaciens	0	0	0	0	0.13099	0
comamonas sp.	0	0	0	0	0.0873267	0
coriobacteriaceae	0	0.00382205	0.00404875	0	0	0.00197683
coriobacteriales	0.896215	0	0.00404875	0	0	0.00197683
corynebacteriaceae	0.00293841	0.00382205	0.0121462	0	0.0109158	0
corynebacterium	0	0	0.00809749	0.00229447	0.00545792	0.00197683
corynebacterium freneyi	0.00293841	0.328696	0	0	0	0
corynebacterium glucuronolyticum	0.0117536	0.00382205	0	0	0	0.00197683
corynebacterium mastitidis	0.984368	1.86898	1.60735	2.00996	7.63563	2.80908
corynebacterium matruchotii	0	0.00382205	0.00809749	0.00229447	0.0491213	0.00395366
corynebacterium pseudodiphtheriticum	0	0	0	0	0.201943	0.00197683
corynebacterium pseudogenitalium	0	0.00382205	0	0.00229447	0	0.00197683
corynebacterium riegelii	0.00293841	0.489222	0	0	0	0
corynebacterium sp.	0.273272	0.00382205	0	0	0	0
corynebacterium spp.	1.09603	1.05488	3.77343	0.043595	2.05218	0.0276756
corynebacterium tuberculostearicum	0.00881523	0.0114661	0.327948	0.00688342	1.14071	0.0850038
cupriavidus metallidurans	0	0	0	0	0.00545792	0
curtobacterium flaccumfaciens	0.188058	0	0.00809749	0.00229447	0.26198	0.00790733
curtobacterium pusillum	0.396685	0.496866	0.00809749	0.0596563	0	0.00197683
cyanobacteria	0	0	0	0	0	0
cytophagaceae	0	0	0	0	0	0
cytophagales	0	0	0.00404875	0	0	0
deferribacteraceae	0.00587682	0.00764409	0.0202437	0	0.0109158	0
deferribacterales	0.00293841	0	0	0	0	0
deinococcus geothermalis	0	0	0	0	0	0
delftia sp.	0.00587682	0	0.00404875	0	0	0
delftia spp.	0.649389	0.0191102	0.591117	0.0183558	0.0218317	0.0434903
deltaproteobacteria	0	0	0	0.169791	0.00545792	0.0158147
desulfobacterales	0	0.0343984	0	0	0	0
desulfovibrionaceae	0	0.00382205	0	0	0	0
desulfovibrionales	0.552421	0	0	0	0	0
desulfuromonadales	0	0	0	0	0	0
devosia crocina	0	0	0	0	0.120074	0
devosia spp.	0	0	0.00404875	0	0	0
dialister invisus	0	0	0	0	0	0.00395366
dolosigranulum spp.	0	0	0	0	0.365681	0
duganella zoogloeoides	0	0.00382205	0	0.00229447	0	0
empedobacter	0	0	0	0.00229447	0.0109158	0.00197683
enhydrobacter aerosaccus	0	0	0	0	0.152822	0
enterobacter hormaechei	0	0.0726189	0	0	0	0
enterobacter ludwigii	0.138105	0	0	0	0	0
enterobacter sp.	0	0	0	0	0	0.00197683
enterobacteriales	0	0	0	0.00458895	0.0491213	0.0316293
enterococcus casseliflavus	0	0	0	0	0	0
enterococcus cecorum	0.00293841	0	0	0.00229447	0.1037	0
enterococcus gallinarum	0.305595	0.428069	0.530386	0.325815	0.52396	0.428972
enterococcus mundtii	0	0	0	0	0.0982425	0
enterorhabdus caecimuris	0	0	0.00404875	0	0.00545792	0
erysipelatoclostridium clostridium cocleatum	0	0	0	0	0	0
erysipelotrichia	0.00293841	0	0.00404875	0	0	0.00395366
escherichia coli	0.00293841	0	0.0121462	0.0665397	0	0.00197683
eubacterium	0	0	0	0	0	0
eubacterium rectale	0	0.214035	0	0.00229447	0	0
eubacterium sp.	0	0	0.016195	0	0	0
fimbriimonadales	0	0	0	0	0.26198	0
firmicutes	0.00293841	0	0	0	0.39297	0
flavobacteriaceae	0	0	0	0.0252392	0.693156	0
flavobacterium	0	0	0	0.0596563	0	0
frigoribacterium faeni	0	0	0	0	0.0382054	0
fusobacteriaceae	0.141044	0.00382205	0	0	0	0.00197683
fusobacteriales	0.00293841	1.31478	0	0	0	0
fusobacterium necrophorum	0	0	0	0.00229447	0.223775	0
fusobacterium nucleatum	0.00587682	1.0396	0.00404875	0	0.431176	0.00197683
fusobacterium periodonticum	0.00587682	0	0.00404875	0	0	0.00593049
fusobacterium spp.	0	0	0	0	0.065495	0
galbitalea	0	0	0	0	0	0
gammaproteobacteria	0	0	0	0	0	0
gemella haemolysans	0	0	0.00404875	0.00229447	0.00545792	0
gemella morbillorum	0	0	0	0.00458895	0.349307	0
gemella sanguinis	0.00293841	0.00382205	0.00404875	0	0.00545792	0.00197683
gemmatimonadaceae	0	0	0	0.00229447	0	0.00197683
gemmatimonadales	0	0.00382205	0	0	0	0
geobacillus	0	0	0	0	0	0
geobacillus bacillus sp.	0	0	0	0	0	0.0158147
geobacillus stearothermophilus	0	0	0	0	0.0109158	0.00197683
gloeobacteraceae	0.00293841	0	0	0	0	0.00197683
gordonia terrae	0	0	0	0	0.109158	0
granulicatella adiacens	0	0	0	0	0.196485	0
granulicatella elegans	0	0	0	0	0	0
granulicatella paradiacens	0	0.00382205	0.00809749	0.00688342	0	0
haemophilus parainfluenzae	0.00293841	0.00764409	0.0121462	0	0.305643	0.00197683
haemophilus sputorum	0	0	0	0.00229447	0	0
halolactibacillus halophilus	0	0	0	0	0.00545792	0.00197683
halospirulina sp.	0	0	0	0	0	0
helicobacter ganmani	4.24894	7.00963	5.72088	0.419888	2.39603	0.0494208
helicobacter hepaticus	0.126352	0.0114661	0.00404875	0	0.0109158	0.154193
herbaspirillum huttiense	0	0	0	0	0	0
hydrogenophaga spp.	0	0	0	0.0321226	0	0
hydrogenophilus hirschii	0	0	0	0.0137668	0.201943	0.00197683
hymenobacter	0.12929	0	0	0	0.00545792	0.00197683
hymenobacter ginsengisoli	0	0	0	0	0	0
hymenobacter spp.	0	0	0	0	0	0
janthinobacterium sp.	0	0	0	0	0	0
jeotgalicoccus sp.	0	0	0	0	0	0
kaistia adipata	0.00293841	0	0	0	0.00545792	0.00593049
kaistobacter spp.	0	0	0	0	0	0
klebsiella oxytoca	0.429008	0	0	0	0	0.00197683
kocuria rhizophila	0	0	0	0	0.114616	0
kosakonia enterobacter cowanii	0.00587682	0	0.00404875	0	0	0
kurthia gibsonii	0.302656	0	0	0	0	0
kytococcus sedentarius	0	0.00382205	0	0	0	0.00197683
lachnoanaerobaculum eubacterium saburreum	0	0	0	0	0.68224	0
lachnospiraceae	0.423131	0.0114661	0.0202437	0.0711287	0.0218317	0.00197683
lactobacillaceae	0.57299	0	0	0	0	0
lactobacillales	0	0	0	0.00229447	0	0
lactobacillus acidophilus	0.0235073	0.0496866	0.0283412	0.00917789	0.0218317	0.0217451
lactobacillus curvatus	0	0	0.00809749	0	0	0.00197683
lactobacillus gallinarum	0.00881523	0.00764409	0.0121462	0.00917789	2.50519	0.0138378
lactobacillus helveticus	0	0	0.00404875	0	0	0
lactobacillus johnsonii	0.00293841	0.98991	0	0	0	0.00395366
lactobacillus murinus	0.0940291	0.00764409	1.37657	0.0114724	0.0163738	0.00395366
lactobacillus paracasei	0.00587682	0.00764409	0.00809749	0.00917789	0.0764109	0.00593049
lactobacillus plantarum	0.00293841	0.00382205	0.0202437	0.00688342	0.15828	0.0256988
lactobacillus salivarius	0	0.00382205	0	0.00229447	0	0.00197683
lactobacillus zeae	0	0	0.00404875	0	0.0327475	0.00197683
lactococcus lactis	0	0	0	0	1.05884	0
lautropia spp.	0	0	0	0	0	0
legionellales	0	0	0	0	0	0
leifsonia	0	0	0.392728	0	0	0
leptolyngbyaceae	0	0	0	0	0.414802	0
leptotrichia sp.	0	0	0	0	0	0
leuconostoc carnosum	0.00293841	0.00382205	0	0.00458895	0.00545792	0
marinococcus sp.	0	0	0.00404875	0	0	0
marmoricola sp.	0	0	0	0	0	0
massilia spp.	0.00881523	0	0	0	0.147364	0.00395366
massilia timonae	0.00293841	0	0	0	0.13099	0
methylobacterium adhaesivum	0	0	0	0	0.0491213	0
methylobacterium sp.	0	0.0191102	0	0	0	0
microbacteriaceae	0.0940291	0	0	0	0	0
microbacterium sp.	0	0.00382205	0.00404875	0	0.0218317	0
microbacterium spp.	0	0	0	0	0	0
microbacterium testaceum	0	0	0.202437	0	0	0
microchaetaceae	0.00293841	0	0.00404875	0	0.474839	0
micrococcus luteus	0	0.00382205	0.0121462	0	0.234691	0.00197683
micrococcus sp.	0	0	0	0	0	0
microvirga spp.	0	0	0	0.00229447	0	0
modestobacter sp.	0	0	0	0	0	0
mucispirillum	0.326164	0.191102	0.48585	0.100957	0.496671	0.0652354
mucispirillum sp.	0.279149	2.02186	2.03652	0.318932	3.67318	0.104772
mycobacteriaceae	0	0	0	0	0	0
mycobacterium ratisbonense	0.00293841	0.00382205	0	0	0.294728	0
neisseria sicca	0	0	0	0.0665397	0	0
neisseria spp.	0.00293841	0	0	0	0.0109158	0
neisseria subflava	0.00293841	0.00764409	0.00404875	0	0	0.00197683
nesterenkonia sp.	0	0	0	0	0	0
nitrospirales	0	0	0	0.00229447	0.070953	0.0197683
nocardioides	0.0146921	0	0.00404875	0	0.300186	0
nocardiopsis	0.00293841	0.470112	0	0	0	0
nostocales	0	0	0	0	0	0.00593049
novosphingobium spp.	0	0	0	0	0	0
okibacterium fritillariae	0	0	0	0	0	0
opitutus	0.00293841	0	0	0	0	0
oscillatoriales	0	0.0152882	0.00809749	0.0137668	0.660408	0.0177915
oscillospira spp.	0.00293841	1.00902	0	0.00229447	0.474839	0.00197683
paenibacillus	0	0.00382205	0	0.00229447	0.0873267	0.0296525
paenibacillus chondroitinus	0	0	0	0.00229447	0.0218317	0.0197683
paenibacillus hordei	0.00293841	0.240789	0.016195	0.00229447	0.00545792	0.00593049
paenibacillus sp.	0.0411378	0	0	0	0	0
pantoea agglomerans	0.205689	0.236967	0.0121462	0.00229447	0.15828	0.00395366
pantoea ananatis	1.0402	0.886715	2.409	0.0252392	0.283812	0.104772
pantoea sp.	0	0.00382205	0	0	0	0
parabacteroides distasonis	2.004	0.0152882	0	0	0.00545792	0.00395366
paracoccus sp.	0	0	0	0	0	0.00197683
paracraurococcus	0	0	0	0	0	0.00197683
paracraurococcus spp.	0.00293841	0	0	0	1.00426	0
pasteurella pneumotropica	1.23413	3.14172	0.0566825	1.31014	0.0382054	1.26913
pasteurellaceae	1.15773	0.0114661	1.05267	0.321226	0.174653	0.023722
pasteurellales	0	0	0	0	0	0
pedobacter sp.	0	0	0	0	0.480297	0
peptococcus sp.	0	0	0	0	0	0
peptoniphilaceae	0.00293841	0	0.00404875	0	0	0
peptoniphilus asaccharolyticus	0.373178	0.00382205	0	0	0	0
peptostreptococcaceae	0	0	0	0	0.0545792	0
peptostreptococcus stomatis	0	0	0	0	0.39297	0
phenylobacterium sp.	0.00293841	0	0	0.00229447	0.469381	0.00197683
phocaeicola spp.	0	0	0	0	0.201943	0
photobacterium leiognathi	0	0	0	0	0.00545792	0
planctomycetaceae	0	0	0	0.00229447	0	0.0652354
planifilum spp.	0	0	0	0	0	0
plantibacter sp.	0.117536	0	0	0	0	0.00197683
polyangiaceae	0	0	0	0	0	0
polyangium	0	0	0	0	0	0
porphyromonadaceae	1.44864	0.126128	1.6195	0.00458895	0.070953	0.00988416
prevotella aurantiaca	0.00293841	0	0.00404875	0	0	0.00395366
prevotella oris	0	0	0.00404875	0	0.502129	0
prevotella shahii	0	0.00382205	0	0.00229447	0	0
prevotella sp.	0	0	0	0	0.218317	0
prevotella spp.	0	0	0	0.00458895	0.927846	0
promicromonospora aerolata	0	0	0	0	0	0
propionibacteriaceae	0.229196	0.301942	0.0121462	0.00229447	0.0109158	0
propionibacterium acnes	0.822755	2.92769	5.02045	0.355643	22.2519	0.258965
propionibacterium avidum	0	0	0	0	0.120074	0
propionibacterium granulosum	0	0	0.00404875	0.00458895	1.91027	0.0553513
propionibacterium spp.	0.00293841	0	0	0	0.245606	0
prosthecomicrobium	0.00293841	0	0	0.00229447	0.0109158	0
proteobacteria	0	0	0	0	0	0
proteus vulgaris	0	0	0	0	0	0
pseudoclavibacter	0.343794	0	0	0.00229447	0	0.00197683
pseudoclavibacter sp.	0	0.0305764	0	0	0	0
pseudomonadaceae	0	0	0.00404875	0	0.0873267	0
pseudomonadales	0	0	0	0	0	0.035583
pseudomonas	0	0	0	0	0	0
pseudomonas argentinensis	0	0	0	0	0	0
pseudomonas chlororaphis	0	0.00764409	0.03239	0	0	0
pseudomonas oleovorans	0	0	0	0	0	0
pseudomonas protegens	0	0.202568	0	0	0	0
pseudomonas putida	0.0440762	0.00382205	0.749018	0.0734231	0.1037	0.00395366
pseudomonas rhizosphaerae	0	0	0	0	0.185569	0
pseudomonas sp.	0.0558298	0.114661	2.21871	0.0114724	0.0272896	0.0138378
pseudomonas spp.	0.811001	1.49442	1.91101	0.291398	0.545792	0.0415135
pseudomonas stutzeri	0	0	0	0	0.0873267	0
pseudomonas syringae	0	0	0	0.00229447	0.28927	0
pseudomonas tolaasii	0.00881523	0.0152882	0.0404875	0.00688342	0	0.00197683
pseudomonas trivialis	0.0146921	0	0.00404875	0	0.00545792	0.00593049
pseudomonas veronii	0.790433	1.29185	2.28349	0.206503	0.376596	0.0316293
pseudomonas viridiflava	0	0	0	0.00458895	0	0
pseudonocardiaceae	0.00587682	0.18728	0	0	0	0
ralstonia pickettii	0.00587682	0	1.65189	0.0803065	0.52396	0.00395366
rathayibacter tritici	0.161613	0	0	0.00229447	0.0491213	0
rhodococcus	0	0	0	0.00229447	0.00545792	0.00197683
rhodococcus fascians	0	0	0	0.00229447	0	0.00395366
rhodococcus sp.	0	0	0.00404875	0	0	0
rhodococcus spp.	0.00293841	0.00382205	0.00809749	0.00229447	0	0.00395366
rhodospirillaceae	0	0	0	0	0	0
rhodospirillales	0.49953	0	0	0	0	0.00197683
rosenbergiella nectarea	0	0	0	0	0	0.00197683
rothia mucilaginosa	0	0	0	0	0	0.00197683
rubrobacter spp.	0.00293841	0	0	0	0.207401	0.00197683
ruminococcaceae	0.25858	0.588595	0.00404875	0.00458895	0.00545792	0.00395366
selenomonas sp.	0	0	0	0	0.136448	0
serratia sp.	0	0	0.00404875	0	0	0
shewanellaceae	0	0	0	0	0	0
shigella flexneri	0	0.00382205	0.00809749	0	0.00545792	0.00395366
shuttleworthia satelles	0.446638	0	0.00404875	0	0	0
solirubrobacteraceae	0	0	0	0	0	0
sphaerobacter	0	0	0	0	0.0927846	0
sphaerobacteraceae	0	0	0	0	0.0491213	0
sphaerobacterales	0	0.271365	0	0	0	0.00197683
sphingobacteriales	0	0	0	0	0.0327475	0.00790733
sphingobacteriia	0	0	0	0	0	0
sphingobacterium	0	0	0.00404875	0.00229447	0	0.00197683
sphingobacterium spp.	0	0	0	0.00229447	0	0
sphingomonas	0.00293841	0.806452	0	0	0	0
sphingomonas aerolata	0	0	0	0	0.387512	0
sphingomonas cynarae	0	0	0	0	0	0.00197683
sphingomonas echinoides	0	0.00382205	0	0.00229447	0	0
sphingomonas melonis	0	0	0	0.0481839	0	0
sphingomonas sp.	0.00293841	0.126128	0.00404875	0	0	0
sphingomonas spp.	0.0440762	0.462468	0	0	0.00545792	0.00395366
sphingomonas wittichii	0	0.00382205	0	0	0	0.00197683
spirochaetaceae	0	0.680324	0	0	0	0
spirochaetales	0	0.0114661	0	0	0	0
staphylococcaceae	0.00587682	0.00382205	0	0	0	0.00197683
staphylococcus aureus	0	0	0	0.00229447	0	0
staphylococcus epidermidis	0.270334	4.49855	0.0242925	0.0573618	1.5828	0.126517
staphylococcus hominis	0	0	0.00404875	0	1.03155	0
staphylococcus lentus	0.346732	0.626815	0	0.105546	0	0
staphylococcus nepalensis	0.117536	0.00764409	11.0166	0.0321226	2.76171	0.0217451
staphylococcus pasteuri	0.00293841	0	0	0	0.234691	0
staphylococcus saprophyticus	12.0357	22.2863	13.2354	57.4031	10.8176	84.5451
staphylococcus sp.	0.0675835	0.0764409	0.12956	0.426772	0.065495	0.593049
staphylococcus spp.	0.00293841	0	0	0	0.70953	0.00593049
staphylococcus succinus	0	0	0.00404875	0.00229447	0	0
stenotrophomonas maltophilia	0.00587682	1.02049	0.00809749	0.00458895	0	0.00593049
stenotrophomonas rhizophila	0	0	0	0	0	0
stenotrophomonas spp.	0	0	0	0	0	0
streptococcaceae	0	0	0	0	0.00545792	0
streptococcus acidominimus	1.78949	2.78245	0.0364387	0.922378	0.0163738	0.00593049
streptococcus cristatus	0	0	0	0	0	0.00197683
streptococcus gordonii	0	0	0	0	0.180111	0
streptococcus infantis	0	0	0.00404875	0.00229447	0.1037	0.00593049
streptococcus mitis	0	0	0.00404875	0	0.0982425	0
streptococcus oralis	0	0	0	0	0	0
streptococcus salivarius	0.0264457	0	0.0242925	0	0.0163738	0
streptococcus sanguinis	0	0	0	0	0.322017	0.00197683
streptococcus sp.	0	0	0.00404875	0	0	0
streptococcus spp.	3.67889	0.986088	0.0283412	0.149141	0.0163738	0.0632586
streptococcus thermophilus	19.6403	0.0955511	7.36467	0.114724	8.4434	0.278733
streptomycetaceae	0	0	0	0.00917789	0	0
sutterellaceae	0.285026	0	0	0	0	0
synechococcus sp.	0	0	0	0	0.191027	0
tepidimonas taiwanensis	0	0	0	0	0	0
tepidiphilus spp.	0	0	0	0	0	0
tsukamurellaceae	0	0.00382205	0	0.00229447	0.0382054	0.0968647
turicibacter spp.	0.00293841	0	0	0	0.305643	0
veillonella parvula	0.00293841	0	0	0.00458895	0.272896	0.00593049
veillonella tobetsuensis	0	0	0	0	0	0
weissella cibaria	0	0.084085	0.854286	0.00229447	0.00545792	0.00197683
weissella hellenica	0.00293841	0	0	0	0	0
xanthomonadaceae	0	0	0	0	0.229233	0
xanthomonas melonis	0	0	0	0	0	0.00197683
