# Supplementary material for: Neonatal-derived IL-17 producing dermal γδ T cells are required to prevent spontaneous atopic dermatitis
Source: eLife. 2020 Feb 17;9:e51188. doi: 10.7554/eLife.51188 (PMC7025821; doi:10.7554/eLife.51188)
Supplement: Figure 6—source data 1. — Values indicate percent of all reads per sample (total = 1). [file elife-51188-fig6-data1.xlsx]

## Sheet: LMC Vb4 Skin
Source Data for Figure 6H.
CDR3	TRBV	TRBJ	PercentOfTotal
CASSQDSSAETLYF	TRBV2	TRBJ2-3	0.664084
CASSQGGTTNSDYTF	TRBV2	TRBJ1-2	0.15412
CASSQAGRQNTLYF	TRBV2	TRBJ2-4	0.0979189
CASSQGGTTNSDYPF	TRBV2	TRBJ1-2	0.0106832
CASSLLYTNTEVFF	TRBV2	TRBJ1-1	0.00474945
CASSQDSGAETLYF	TRBV2	TRBJ2-3	0.00421591
CARSQDSSAETLYF	TRBV2	TRBJ2-3	0.00266463
CASSQDSSAEMLYF	TRBV2	TRBJ2-3	0.00246725
CAGSQDSSAETLYF	TRBV2	TRBJ2-3	0.0020509
CASSQDSSNERLFF	TRBV2	TRBJ1-4	0.00196455
CASSQGSSAETLYF	TRBV2	TRBJ2-3	0.00175483
CASSQDSSAEALYF	TRBV2	TRBJ2-3	0.00144951
CASGQDSSAETLYF	TRBV2	TRBJ2-3	0.0013539
CASSQDSSAETPYF	TRBV2	TRBJ2-3	0.0012953
CASSQDSSAGTLYF	TRBV2	TRBJ2-3	0.00125521
CASSPDSSAETLYF	TRBV2	TRBJ2-3	0.00123362
CASRQDSSAETLYF	TRBV2	TRBJ2-3	0.00122129
CASSRDSSAETLYF	TRBV2	TRBJ2-3	0.00119045
CASSQDPSAETLYF	TRBV2	TRBJ2-3	0.0010455
CASSQAGRQNSLYF	TRBV2	TRBJ2-4	0.000922134
CASSQDSSAETLHF	TRBV2	TRBJ2-3	0.000860452
CASSQGGTINSDYTF	TRBV2	TRBJ1-2	0.000814192
CASSQDSSAETLCF	TRBV2	TRBJ2-3	0.000758679
CASSQAGQQNTLYF	TRBV2	TRBJ2-4	0.000616812
CASSQDGSAETLYF	TRBV2	TRBJ2-3	0.000567467
CASSQGGATNSDYTF	TRBV2	TRBJ1-2	0.000564383
CASSQDSSADTLYF	TRBV2	TRBJ2-3	0.000555131
CASNQDSSAETLYF	TRBV2	TRBJ2-3	0.000511954
CASSQDSRAETLYF	TRBV2	TRBJ2-3	0.000490365
CAGSQGGTTNSDYTF	TRBV2	TRBJ1-2	0.000474945
CASSQDSSEETLYF	TRBV2	TRBJ2-3	0.000450273
CASSQGGTTSSDYTF	TRBV2	TRBJ1-2	0.000450273
CASSHDSSAETLYF	TRBV2	TRBJ2-3	0.0004256
CASSQDSSTETLYF	TRBV2	TRBJ2-3	0.000397844
CARSQGGTTNSDYTF	TRBV2	TRBJ1-2	0.00039476
CASSQDSNAETLYF	TRBV2	TRBJ2-3	0.000385507
CTSSQDSSAETLYF	TRBV2	TRBJ2-3	0.000376255
CASSQEKTGGSDYTF	TRBV2	TRBJ1-2	0.000370087
CASSQASSAETLYF	TRBV2	TRBJ2-3	0.000363919
CASSQGGTTNSDHTF	TRBV2	TRBJ1-2	0.000360835
CACSQDSSAETLYF	TRBV2	TRBJ2-3	0.000342331
CASSQGGTTNSDYAF	TRBV2	TRBJ1-2	0.000342331
CVSSQDSSAETLYF	TRBV2	TRBJ2-3	0.000342331
CASSQDSSVETLYF	TRBV2	TRBJ2-3	0.000329994
CASSQDSSAETLSF	TRBV2	TRBJ2-3	0.000317658
CASSQAGRQSTLYF	TRBV2	TRBJ2-4	0.00031149
CASRQAGRQNTLYF	TRBV2	TRBJ2-4	0.000299154
CASSQDSGAEMLYF	TRBV2	TRBJ2-3	0.00029607
CANSQDSSAETLYF	TRBV2	TRBJ2-3	0.000292986
CASSQAGRQDTLYF	TRBV2	TRBJ2-4	0.000289902
CASSQGGTTNPDYTF	TRBV2	TRBJ1-2	0.000286817
CASSQDRSAETLYF	TRBV2	TRBJ2-3	0.000283733
CASRQGGTTNSDYTF	TRBV2	TRBJ1-2	0.000274481
CASSRGGTTNSDYTF	TRBV2	TRBJ1-2	0.000268313
CASSQAGRQNTLCF	TRBV2	TRBJ2-4	0.000265229
CASSQDSSAATLYF	TRBV2	TRBJ2-3	0.000265229
CASSQAGRQNTSYF	TRBV2	TRBJ2-4	0.000262145
CASSQDNSAETLYF	TRBV2	TRBJ2-3	0.000262145
CASGQGGTTNSDYTF	TRBV2	TRBJ1-2	0.000259061
CARSQAGRQNTLYF	TRBV2	TRBJ2-4	0.000255977
CASSQDSSAEPLYF	TRBV2	TRBJ2-3	0.000255977
CASSQGGTTNSDYSF	TRBV2	TRBJ1-2	0.000252893
CAGSQAGRQNTLYF	TRBV2	TRBJ2-4	0.000249809
CASSQDSSAEKLYF	TRBV2	TRBJ2-3	0.000218968
CASSQGGPTNSDYTF	TRBV2	TRBJ1-2	0.000218968
CASSQGGTTNSGYTF	TRBV2	TRBJ1-2	0.000215884
CASSQGGTTNSDCTF	TRBV2	TRBJ1-2	0.000209716
CASSRAGRQNTLYF	TRBV2	TRBJ2-4	0.000209716
CASSQGGTANSDYTF	TRBV2	TRBJ1-2	0.000206632
CASSQETGRDTQYF	TRBV2	TRBJ2-5	0.000203548
CASSQGGTTDSDYTF	TRBV2	TRBJ1-2	0.000194296
CASSQDSSAETQYF	TRBV2	TRBJ2-3	0.000188128
CASSQDDWKNTLYF	TRBV2	TRBJ2-4	0.000175791
CASSQDTSAETLYF	TRBV2	TRBJ2-3	0.000175791
CASSQAGRQNALYF	TRBV2	TRBJ2-4	0.000172707
CASSEDSSAETLYF	TRBV2	TRBJ2-3	0.000163455
CASSQDCSAETLYF	TRBV2	TRBJ2-3	0.000163455
CASSQNSSAETLYF	TRBV2	TRBJ2-3	0.000163455
CASSQEGRQNTLYF	TRBV2	TRBJ2-4	0.000157287
CARRQDSSAETLYF	TRBV2	TRBJ2-3	0.000151119
CASSQDFSAETLYF	TRBV2	TRBJ2-3	0.000151119
CASSQDSSAETMYF	TRBV2	TRBJ2-3	0.000151119
CASSQESSAETLYF	TRBV2	TRBJ2-3	0.000151119
CASGQAGRQNTLYF	TRBV2	TRBJ2-4	0.000148035
CASSQAGRRNTLYF	TRBV2	TRBJ2-4	0.000144951
CASSQDSSGETLYF	TRBV2	TRBJ2-3	0.000141867
CASSQDSSSETLYF	TRBV2	TRBJ2-3	0.000141867
CASSQAGWQNTLYF	TRBV2	TRBJ2-4	0.000138783
CASSQAGRQNTLHF	TRBV2	TRBJ2-4	0.000132615
CASSQDSSAETRYF	TRBV2	TRBJ2-3	0.000132615
CASSQGGTTNSDYIF	TRBV2	TRBJ1-2	0.000132615
CASSQDSSAETLNF	TRBV2	TRBJ2-3	0.00012953
CASSQDSSAKTLYF	TRBV2	TRBJ2-3	0.00012953
CASSKDSSAETLYF	TRBV2	TRBJ2-3	0.000126446
CASSQGGTTNYDYTF	TRBV2	TRBJ1-2	0.000126446
CASSPTGQNTEVFF	TRBV2	TRBJ1-1	0.000123362
CASSQVGRQNTLYF	TRBV2	TRBJ2-4	0.000123362
CSSSQDSSAETLYF	TRBV2	TRBJ2-3	0.000120278
CASNQGGTTNSDYTF	TRBV2	TRBJ1-2	0.000117194
CASSQVSSAETLYF	TRBV2	TRBJ2-3	0.00011411
CAGRQDSSAETLYF	TRBV2	TRBJ2-3	0.000111026
CGSSQDSSAETLYF	TRBV2	TRBJ2-3	0.000111026
CASSQGRTTNSDYTF	TRBV2	TRBJ1-2	0.000107942
CASSQGGITNSDYTF	TRBV2	TRBJ1-2	0.000104858
CASSQGGTTKSDYTF	TRBV2	TRBJ1-2	0.000104858
CASSQDSTAETLYF	TRBV2	TRBJ2-3	0.000101774
CASSQEGTTNSDYTF	TRBV2	TRBJ1-2	0.000101774
CAISQDSSAETLYF	TRBV2	TRBJ2-3	9.86899e-05
CASSHGGTTNSDYTF	TRBV2	TRBJ1-2	9.86899e-05
CASSPGGQDTQYF	TRBV2	TRBJ2-5	9.86899e-05
CASSXDSSAETLYF	TRBV2	TRBJ2-3	9.86899e-05
CASSQAGRQKTLYF	TRBV2	TRBJ2-4	9.56058e-05
CASSQDNSQNTLYF	TRBV2	TRBJ2-4	9.56058e-05
CASSQDSSAVTLYF	TRBV2	TRBJ2-3	9.56058e-05
CASSQDSIAETLYF	TRBV2	TRBJ2-3	9.25218e-05
CASSQDSSPETLYF	TRBV2	TRBJ2-3	9.25218e-05
CASSQGGTTHSDYTF	TRBV2	TRBJ1-2	9.25218e-05
CASSPQGAETLYF	TRBV2	TRBJ2-3	8.94377e-05
CASSQDSSAETLDF	TRBV2	TRBJ2-3	8.94377e-05
CACSQGGTTNSDYTF	TRBV2	TRBJ1-2	8.63537e-05
CASSQDSSAQTLYF	TRBV2	TRBJ2-3	8.63537e-05
CASSQGGTTNSAYTF	TRBV2	TRBJ1-2	8.63537e-05
CASSQGGTTTSDYTF	TRBV2	TRBJ1-2	8.63537e-05
CTSSQGGTTNSDYTF	TRBV2	TRBJ1-2	8.63537e-05
CASSQAGRQHTLYF	TRBV2	TRBJ2-4	8.32696e-05
CDSSQDSSAETLYF	TRBV2	TRBJ2-3	8.01855e-05
CASSHQSANSDYTF	TRBV2	TRBJ1-2	7.71015e-05
CASSQQPNSDYTF	TRBV2	TRBJ1-2	7.71015e-05
CASSLDSSAETLYF	TRBV2	TRBJ2-3	7.40174e-05
CASSQGGTTNSNYTF	TRBV2	TRBJ1-2	7.40174e-05
CASSQRWEGNTLYF	TRBV2	TRBJ2-4	7.40174e-05
CVSSQGGTTNSDYTF	TRBV2	TRBJ1-2	7.40174e-05
CASSQDWGGWSLYF	TRBV2	TRBJ2-4	7.09334e-05
CASSQEWGGGQDTQYF	TRBV2	TRBJ2-5	7.09334e-05
CASSQGGSTNSDYTF	TRBV2	TRBJ1-2	7.09334e-05
CASSQGGTKNSDYTF	TRBV2	TRBJ1-2	7.09334e-05
CASSQAGRQTTLYF	TRBV2	TRBJ2-4	6.47652e-05
CASSQARRQNTLYF	TRBV2	TRBJ2-4	6.47652e-05
CASSQDSCAETLYF	TRBV2	TRBJ2-3	6.47652e-05
CASSQDSSAETLFF	TRBV2	TRBJ2-3	6.47652e-05
CASSQAGGAGQNTLYF	TRBV2	TRBJ2-4	6.16812e-05
CASSQAGRHNTLYF	TRBV2	TRBJ2-4	6.16812e-05
CASSQAGRQNILYF	TRBV2	TRBJ2-4	6.16812e-05
CASSQAGRQNPLYF	TRBV2	TRBJ2-4	6.16812e-05
CASSQDTEYEQYF	TRBV2	TRBJ2-7	6.16812e-05
CASSQGGKTNSDYTF	TRBV2	TRBJ1-2	6.16812e-05
CASSQRHLQNTLYF	TRBV2	TRBJ2-4	6.16812e-05
CACSQAGRQNTLYF	TRBV2	TRBJ2-4	5.85971e-05
CASSHAGRQNTLYF	TRBV2	TRBJ2-4	5.85971e-05
CASSPGGTTNSDYTF	TRBV2	TRBJ1-2	5.85971e-05
CASSQDINQDTQYF	TRBV2	TRBJ2-5	5.85971e-05
CASSQDWDSQDTQYF	TRBV2	TRBJ2-5	5.85971e-05
CASSQDYSAETLYF	TRBV2	TRBJ2-3	5.85971e-05
CASSQGATTNSDYTF	TRBV2	TRBJ1-2	5.85971e-05
CASSQGGTTNSEYTF	TRBV2	TRBJ1-2	5.85971e-05
CVSSQAGRQNTLYF	TRBV2	TRBJ2-4	5.85971e-05
CASSEAGRQNTLYF	TRBV2	TRBJ2-4	5.55131e-05
CASSQGGTPNSDYTF	TRBV2	TRBJ1-2	5.55131e-05
CASSWDSSAETLYF	TRBV2	TRBJ2-3	5.55131e-05
CASSQDSSAERLYF	TRBV2	TRBJ2-3	5.2429e-05
CASSQGGTTNFDYTF	TRBV2	TRBJ1-2	5.2429e-05
CASSQGGTTNSDSTF	TRBV2	TRBJ1-2	5.2429e-05
CASSQGGTTNSDYNF	TRBV2	TRBJ1-2	5.2429e-05
CASSQYSSAETLYF	TRBV2	TRBJ2-3	5.2429e-05
CASSQDSSAESLYF	TRBV2	TRBJ2-3	4.93449e-05
CASSQEAGNYAEQFF	TRBV2	TRBJ2-1	4.93449e-05
CASSQGGTTNSVYTF	TRBV2	TRBJ1-2	4.93449e-05
CASCQDSSAETLYF	TRBV2	TRBJ2-3	4.62609e-05
CASIQDSSAETLYF	TRBV2	TRBJ2-3	4.62609e-05
CASSPAGRQNTLYF	TRBV2	TRBJ2-4	4.62609e-05
CASSQAGRQNNLYF	TRBV2	TRBJ2-4	4.62609e-05
CASSQGETTNSDYTF	TRBV2	TRBJ1-2	4.62609e-05
CASSQGGATNSDYPF	TRBV2	TRBJ1-2	4.62609e-05
CASSQVSGVDTQYF	TRBV2	TRBJ2-5	4.62609e-05
CASSEGGTTNSDYTF	TRBV2	TRBJ1-2	4.31768e-05
CASSKGGTTNSDYTF	TRBV2	TRBJ1-2	4.31768e-05
CASSQDSSAETVYF	TRBV2	TRBJ2-3	4.31768e-05
CASSQEQGASDYTF	TRBV2	TRBJ1-2	4.31768e-05
CASSQGDYNSPLYF	TRBV2	TRBJ1-6	4.31768e-05
CASSQGGGGARREQYF	TRBV2	TRBJ2-7	4.31768e-05
CASSQGGTINSDYPF	TRBV2	TRBJ1-2	4.31768e-05
CASSQGKQGNTEVFF	TRBV2	TRBJ1-1	4.31768e-05
CASSQNTGQLYF	TRBV2	TRBJ2-2	4.31768e-05
CASSQYRGQAPLF	TRBV2	TRBJ1-5	4.31768e-05
CTSSQAGRQNTLYF	TRBV2	TRBJ2-4	4.31768e-05
CASSQAGRQNTLSF	TRBV2	TRBJ2-4	4.00928e-05
CASSQDWGENTLYF	TRBV2	TRBJ2-4	4.00928e-05
CASSQHSSAETLYF	TRBV2	TRBJ2-3	4.00928e-05
CASSQDSSAEXLYF	TRBV2	TRBJ2-3	3.70087e-05
CASSQGEYSPLYF	TRBV2	TRBJ1-6	3.70087e-05
CASSQGGTTNSYYTF	TRBV2	TRBJ1-2	3.70087e-05
CASSQGGTTSSDYPF	TRBV2	TRBJ1-2	3.70087e-05
CASSQSKYTEVFF	TRBV2	TRBJ1-1	3.70087e-05
CASSQSSSYEQYF	TRBV2	TRBJ2-7	3.70087e-05
CAGSQGGTTNSDYPF	TRBV2	TRBJ1-2	3.39247e-05
CANSQGGTTNSDYTF	TRBV2	TRBJ1-2	3.39247e-05
CASNQAGRQNTLYF	TRBV2	TRBJ2-4	3.39247e-05
CASSKAGRQNTLYF	TRBV2	TRBJ2-4	3.39247e-05
CASSPQGGSSAETLYF	TRBV2	TRBJ2-3	3.39247e-05
CASSQAGRKNTLYF	TRBV2	TRBJ2-4	3.39247e-05
CASSQAGRQYTLYF	TRBV2	TRBJ2-4	3.39247e-05
CASSQDPSNSDYTF	TRBV2	TRBJ1-2	3.39247e-05
CASSQDSQNTLYF	TRBV2	TRBJ2-4	3.39247e-05
CASSQEKTGGSDYPF	TRBV2	TRBJ1-2	3.39247e-05
CASSQGGQDTQYF	TRBV2	TRBJ2-5	3.39247e-05
CASTQDSSAETLYF	TRBV2	TRBJ2-3	3.39247e-05
CARSLLYTNTEVFF	TRBV2	TRBJ1-1	3.08406e-05
CARSQDSGAETLYF	TRBV2	TRBJ2-3	3.08406e-05
CASSQAERQNTLYF	TRBV2	TRBJ2-4	3.08406e-05
CASSQDQGRNTLYF	TRBV2	TRBJ2-4	3.08406e-05
CASSQDWGNYAEQFF	TRBV2	TRBJ2-1	3.08406e-05
CASSQGGTTNSHYTF	TRBV2	TRBJ1-2	3.08406e-05
CASSQGTAYEQYF	TRBV2	TRBJ2-7	3.08406e-05
CASSQGWTTNSDYTF	TRBV2	TRBJ1-2	3.08406e-05
CASSTGENSPLYF	TRBV2	TRBJ1-6	3.08406e-05
CARGQDSSAETLYF	TRBV2	TRBJ2-3	2.77565e-05
CASQTGVGNTLYF	TRBV2	TRBJ1-3	2.77565e-05
CASRQDSSEETLYF	TRBV2	TRBJ2-3	2.77565e-05
CASSLAGRQNTLYF	TRBV2	TRBJ2-4	2.77565e-05
CASSQDSGAGTLYF	TRBV2	TRBJ2-3	2.77565e-05
CASSQDSRADTLYF	TRBV2	TRBJ2-3	2.77565e-05
CASSQDSSNERLLF	TRBV2	TRBJ1-4	2.77565e-05
CASSQDVNNYAEQFF	TRBV2	TRBJ2-1	2.77565e-05
CASSQETGGKDTQYF	TRBV2	TRBJ2-5	2.77565e-05
CASSQGGTANSDYPF	TRBV2	TRBJ1-2	2.77565e-05
CASSQGGTRNSDYTF	TRBV2	TRBJ1-2	2.77565e-05
CASSQGGTTNSDNTF	TRBV2	TRBJ1-2	2.77565e-05
CASSQTGRQNTLYF	TRBV2	TRBJ2-4	2.77565e-05
CASSQXSSAETLYF	TRBV2	TRBJ2-3	2.77565e-05
CATSQDSSAETLYF	TRBV2	TRBJ2-3	2.77565e-05
CDSSQGGTTNSDYTF	TRBV2	TRBJ1-2	2.77565e-05
CAGSPDSSAETLYF	TRBV2	TRBJ2-3	2.46725e-05
CARRQAGRQNTLYF	TRBV2	TRBJ2-4	2.46725e-05
CARSQGGTTNSDYPF	TRBV2	TRBJ1-2	2.46725e-05
CARSRDSSAETLYF	TRBV2	TRBJ2-3	2.46725e-05
CASRQGGTTNSDYPF	TRBV2	TRBJ1-2	2.46725e-05
CASSPGGFSNERLFF	TRBV2	TRBJ1-4	2.46725e-05
CASSQAARQNTLYF	TRBV2	TRBJ2-4	2.46725e-05
CASSQAGRENTLYF	TRBV2	TRBJ2-4	2.46725e-05
CASSQDSAETLYF	TRBV2	TRBJ2-3	2.46725e-05
CASSQEHTEVFF	TRBV2	TRBJ1-1	2.46725e-05
CASSQGGTSNSDYTF	TRBV2	TRBJ1-2	2.46725e-05
CASSQGGTTNSGYPF	TRBV2	TRBJ1-2	2.46725e-05
CASSQGGTTNTDYTF	TRBV2	TRBJ1-2	2.46725e-05
CASSQGIYNSPLYF	TRBV2	TRBJ1-6	2.46725e-05
CASSQVGARAEQFF	TRBV2	TRBJ2-1	2.46725e-05
CASSQVRYEQYF	TRBV2	TRBJ2-7	2.46725e-05
CPSSQDSSAETLYF	TRBV2	TRBJ2-3	2.46725e-05
CAGSRDSSAETLYF	TRBV2	TRBJ2-3	2.15884e-05
CARSPDSSAETLYF	TRBV2	TRBJ2-3	2.15884e-05
CASSPRGANSDYTF	TRBV2	TRBJ1-2	2.15884e-05
CASSQAGRPNTLYF	TRBV2	TRBJ2-4	2.15884e-05
CASSQAGRQNTLNF	TRBV2	TRBJ2-4	2.15884e-05
CASSQAGTTNSDYTF	TRBV2	TRBJ1-2	2.15884e-05
CASSQDASAETLYF	TRBV2	TRBJ2-3	2.15884e-05
CASSQDLEYEQYF	TRBV2	TRBJ2-7	2.15884e-05
CASSQDWGADTQYF	TRBV2	TRBJ2-5	2.15884e-05
CASSQEWGGLNSDYTF	TRBV2	TRBJ1-2	2.15884e-05
CASSQGGTTNPDYPF	TRBV2	TRBJ1-2	2.15884e-05
CASSQGGTTNSDHPF	TRBV2	TRBJ1-2	2.15884e-05
CASSQPLDWGGYTGQLYF	TRBV2	TRBJ2-2	2.15884e-05
CASSQRGTTNSDYTF	TRBV2	TRBJ1-2	2.15884e-05
CASSQTGRYEQYF	TRBV2	TRBJ2-7	2.15884e-05
CASSQVGTTNSDYTF	TRBV2	TRBJ1-2	2.15884e-05
CASSRGGTTNSDYPF	TRBV2	TRBJ1-2	2.15884e-05
CSSSQGGTTNSDYTF	TRBV2	TRBJ1-2	2.15884e-05
CAGSQDSSAEMLYF	TRBV2	TRBJ2-3	1.85044e-05
CAGSQDSSNERLFF	TRBV2	TRBJ1-4	1.85044e-05
CARSEDSSAETLYF	TRBV2	TRBJ2-3	1.85044e-05
CARSQDSSAEMLYF	TRBV2	TRBJ2-3	1.85044e-05
CASSLLYTNTEAFF	TRBV2	TRBJ1-1	1.85044e-05
CASSPTGGQDTQYF	TRBV2	TRBJ2-5	1.85044e-05
CASSPTSSAETLYF	TRBV2	TRBJ2-3	1.85044e-05
CASSQAGLQNTLYF	TRBV2	TRBJ2-4	1.85044e-05
CASSQAGRQNTLDF	TRBV2	TRBJ2-4	1.85044e-05
CASSQAGRQNTVYF	TRBV2	TRBJ2-4	1.85044e-05
CASSQDISAETLYF	TRBV2	TRBJ2-3	1.85044e-05
CASSQDLRQFF	TRBV2	TRBJ2-1	1.85044e-05
CASSQDSGGNERLFF	TRBV2	TRBJ1-4	1.85044e-05
CASSQDSRVGNTLYF	TRBV2	TRBJ1-3	1.85044e-05
CASSQDWGSSYEQYF	TRBV2	TRBJ2-7	1.85044e-05
CASSQEGARAETLYF	TRBV2	TRBJ2-3	1.85044e-05
CASSQEGTANERLFF	TRBV2	TRBJ1-4	1.85044e-05
CASSQERDTQYF	TRBV2	TRBJ2-5	1.85044e-05
CASSQERGSAETLYF	TRBV2	TRBJ2-3	1.85044e-05
CASSQGENSPLYF	TRBV2	TRBJ1-6	1.85044e-05
CASSQGGFSNERLFF	TRBV2	TRBJ1-4	1.85044e-05
CASSQGGTTHSDYPF	TRBV2	TRBJ1-2	1.85044e-05
CASSQGGTTNSDCPF	TRBV2	TRBJ1-2	1.85044e-05
CASSQGGTTNSDDTF	TRBV2	TRBJ1-2	1.85044e-05
CASSQGQGPPQYF	TRBV2	TRBJ2-5	1.85044e-05
CASSQGQSAETLYF	TRBV2	TRBJ2-3	1.85044e-05
CASSQGVTTNSDYTF	TRBV2	TRBJ1-2	1.85044e-05
CASSQLQGGDSDYTF	TRBV2	TRBJ1-2	1.85044e-05
CASSQPGQNSDYTF	TRBV2	TRBJ1-2	1.85044e-05
CASSQTSDTQYF	TRBV2	TRBJ2-5	1.85044e-05
CASSQVQGSYAEQFF	TRBV2	TRBJ2-1	1.85044e-05
CASSQWGTTNSDYTF	TRBV2	TRBJ1-2	1.85044e-05
CASSRDSNERLFF	TRBV2	TRBJ1-4	1.85044e-05
CAGSLLYTNTEVFF	TRBV2	TRBJ1-1	1.54203e-05
CAISQGGTTNSDYTF	TRBV2	TRBJ1-2	1.54203e-05
CANSQAGRQNTLYF	TRBV2	TRBJ2-4	1.54203e-05
CARSQDSRAETLYF	TRBV2	TRBJ2-3	1.54203e-05
CASRAGIGAEQFF	TRBV2	TRBJ2-1	1.54203e-05
CASRQDSSAEMLYF	TRBV2	TRBJ2-3	1.54203e-05
CASSLGGTTNSDYTF	TRBV2	TRBJ1-2	1.54203e-05
CASSLGQYAEQFF	TRBV2	TRBJ2-1	1.54203e-05
CASSLGTAANSDYTF	TRBV2	TRBJ1-2	1.54203e-05
CASSLLYTNTEDFF	TRBV2	TRBJ1-1	1.54203e-05
CASSPQRIYAEQFF	TRBV2	TRBJ2-1	1.54203e-05
CASSPTGLYEQYF	TRBV2	TRBJ2-7	1.54203e-05
CASSQAGRQNTFYF	TRBV2	TRBJ2-4	1.54203e-05
CASSQAGRQNTLFF	TRBV2	TRBJ2-4	1.54203e-05
CASSQARNTEVFF	TRBV2	TRBJ1-1	1.54203e-05
CASSQAVRQNTLYF	TRBV2	TRBJ2-4	1.54203e-05
CASSQDGENTLYF	TRBV2	TRBJ2-4	1.54203e-05
CASSQDGTGQLYF	TRBV2	TRBJ2-2	1.54203e-05
CASSQDLGGRYEQYF	TRBV2	TRBJ2-7	1.54203e-05
CASSQDLGNYAEQFF	TRBV2	TRBJ2-1	1.54203e-05
CASSQDNNQDTQYF	TRBV2	TRBJ2-5	1.54203e-05
CASSQDPSAEALYF	TRBV2	TRBJ2-3	1.54203e-05
CASSQDRDWGYEQYF	TRBV2	TRBJ2-7	1.54203e-05
CASSQDSGAEILYF	TRBV2	TRBJ2-3	1.54203e-05
CASSQDWGSAETLYF	TRBV2	TRBJ2-3	1.54203e-05
CASSQDWGYEQYF	TRBV2	TRBJ2-7	1.54203e-05
CASSQEEAGITLYF	TRBV2	TRBJ2-4	1.54203e-05
CASSQESGRDTQYF	TRBV2	TRBJ2-5	1.54203e-05
CASSQGGYAEQFF	TRBV2	TRBJ2-1	1.54203e-05
CASSQGQYEQYF	TRBV2	TRBJ2-7	1.54203e-05
CASSQGTGGAREQYF	TRBV2	TRBJ2-7	1.54203e-05
CASSQRGTTNSDYPF	TRBV2	TRBJ1-2	1.54203e-05
CASSQSSAETLYF	TRBV2	TRBJ2-3	1.54203e-05
CASSQSTGRAETLYF	TRBV2	TRBJ2-3	1.54203e-05
CASSRDWGDQDTQYF	TRBV2	TRBJ2-5	1.54203e-05
CASSRDWGYEQYF	TRBV2	TRBJ2-7	1.54203e-05
CASSRELGGSTGQLYF	TRBV2	TRBJ2-2	1.54203e-05
CASSXGGTTNSDYTF	TRBV2	TRBJ1-2	1.54203e-05
CASTQGSYEQYF	TRBV2	TRBJ2-7	1.54203e-05
CDSSQAGRQNTLYF	TRBV2	TRBJ2-4	1.54203e-05
CSRSQGGTTNSDYTF	TRBV2	TRBJ1-2	1.54203e-05
CAGSQEKTGGSDYTF	TRBV2	TRBJ1-2	1.23362e-05
CAISQAGRQNTLYF	TRBV2	TRBJ2-4	1.23362e-05
CARSQDSSNERLFF	TRBV2	TRBJ1-4	1.23362e-05
CASCQAGRQNTLYF	TRBV2	TRBJ2-4	1.23362e-05
CASGQGGTTNSDYPF	TRBV2	TRBJ1-2	1.23362e-05
CASSHATGLQNTLYF	TRBV2	TRBJ2-4	1.23362e-05
CASSLLCTNTEVFF	TRBV2	TRBJ1-1	1.23362e-05
CASSLLHTNTEVFF	TRBV2	TRBJ1-1	1.23362e-05
CASSPDSSAGTLYF	TRBV2	TRBJ2-3	1.23362e-05
CASSPDTQYF	TRBV2	TRBJ2-5	1.23362e-05
CASSPGGSDTQYF	TRBV2	TRBJ2-5	1.23362e-05
CASSPTDNNQAPLF	TRBV2	TRBJ1-5	1.23362e-05
CASSQAGRQNTMYF	TRBV2	TRBJ2-4	1.23362e-05
CASSQATSAETLYF	TRBV2	TRBJ2-3	1.23362e-05
CASSQDEVGNYAEQFF	TRBV2	TRBJ2-1	1.23362e-05
CASSQDGDSYNSPLYF	TRBV2	TRBJ1-6	1.23362e-05
CASSQDGGGQDTQYF	TRBV2	TRBJ2-5	1.23362e-05
CASSQDGGQSNERLFF	TRBV2	TRBJ1-4	1.23362e-05
CASSQDRGNTLYF	TRBV2	TRBJ2-4	1.23362e-05
CASSQDRGYEQYF	TRBV2	TRBJ2-7	1.23362e-05
CASSQDSGAETLHF	TRBV2	TRBJ2-3	1.23362e-05
CASSQDSSEDTLYF	TRBV2	TRBJ2-3	1.23362e-05
CASSQDSSGNTLYF	TRBV2	TRBJ1-3	1.23362e-05
CASSQDWGDYAEQFF	TRBV2	TRBJ2-1	1.23362e-05
CASSQEGGRSERLFF	TRBV2	TRBJ1-4	1.23362e-05
CASSQEHSTYEQYF	TRBV2	TRBJ2-7	1.23362e-05
CASSQELRANTEVFF	TRBV2	TRBJ1-1	1.23362e-05
CASSQETGQVFF	TRBV2	TRBJ1-1	1.23362e-05
CASSQGDKNTLYF	TRBV2	TRBJ2-4	1.23362e-05
CASSQGGRQNTLYF	TRBV2	TRBJ2-4	1.23362e-05
CASSQGGTTNCDYTF	TRBV2	TRBJ1-2	1.23362e-05
CASSQGSSAGTLYF	TRBV2	TRBJ2-3	1.23362e-05
CASSQGTGGAETLYF	TRBV2	TRBJ2-3	1.23362e-05
CASSQHTNSDYTF	TRBV2	TRBJ1-2	1.23362e-05
CASSQLGAQNTLYF	TRBV2	TRBJ2-4	1.23362e-05
CASSQMEGGYAEQFF	TRBV2	TRBJ2-1	1.23362e-05
CASSQNQAPLF	TRBV2	TRBJ1-5	1.23362e-05
CASSQQPYEQYF	TRBV2	TRBJ2-7	1.23362e-05
CASSQRTGDYAEQFF	TRBV2	TRBJ2-1	1.23362e-05
CASSQTGDQDTQYF	TRBV2	TRBJ2-5	1.23362e-05
CASSQTGGALNAEQFF	TRBV2	TRBJ2-1	1.23362e-05
CASSQTGGANTGQLYF	TRBV2	TRBJ2-2	1.23362e-05
CASSQVGNQNTLYF	TRBV2	TRBJ2-4	1.23362e-05
CASSRQGTSAETLYF	TRBV2	TRBJ2-3	1.23362e-05
CASSRQNSDYTF	TRBV2	TRBJ1-2	1.23362e-05
CASSSPGQGVEQYF	TRBV2	TRBJ2-7	1.23362e-05
CASSXAGRQNTLYF	TRBV2	TRBJ2-4	1.23362e-05
CASTQGGTTNSDYTF	TRBV2	TRBJ1-2	1.23362e-05
CAWSQDSSAETLYF	TRBV2	TRBJ2-3	1.23362e-05
CPSSQGGTTNSDYTF	TRBV2	TRBJ1-2	1.23362e-05
CSSSQAGRQNTLYF	TRBV2	TRBJ2-4	1.23362e-05
CVSSQGGTTNSDYPF	TRBV2	TRBJ1-2	1.23362e-05
CACSQGGTTNSDYPF	TRBV2	TRBJ1-2	9.25218e-06
CAGSQAGRQNSLYF	TRBV2	TRBJ2-4	9.25218e-06
CAGSQDSGAETLYF	TRBV2	TRBJ2-3	9.25218e-06
CARSQDSSAETRYF	TRBV2	TRBJ2-3	9.25218e-06
CASNQGGTTNSDYPF	TRBV2	TRBJ1-2	9.25218e-06
CASNRGDQDTQYF	TRBV2	TRBJ2-5	9.25218e-06
CASRDRSYEQYF	TRBV2	TRBJ2-7	9.25218e-06
CASRLLYTNTEVFF	TRBV2	TRBJ1-1	9.25218e-06
CASRQDSSAEPLYF	TRBV2	TRBJ2-3	9.25218e-06
CASRQGSSAETLYF	TRBV2	TRBJ2-3	9.25218e-06
CASRRDRNSDYTF	TRBV2	TRBJ1-2	9.25218e-06
CASSGDTGQLYF	TRBV2	TRBJ2-2	9.25218e-06
CASSHDSSAETLSF	TRBV2	TRBJ2-3	9.25218e-06
CASSHGGTTNSDYPF	TRBV2	TRBJ1-2	9.25218e-06
CASSHPTGDYAEQFF	TRBV2	TRBJ2-1	9.25218e-06
CASSHSSTNTGQLYF	TRBV2	TRBJ2-2	9.25218e-06
CASSLDRSQNTLYF	TRBV2	TRBJ2-4	9.25218e-06
CASSLLYTNAEVFF	TRBV2	TRBJ1-1	9.25218e-06
CASSLLYTNIEVFF	TRBV2	TRBJ1-1	9.25218e-06
CASSLLYTSTEVFF	TRBV2	TRBJ1-1	9.25218e-06
CASSLTGYEQYF	TRBV2	TRBJ2-7	9.25218e-06
CASSPDGSAETLYF	TRBV2	TRBJ2-3	9.25218e-06
CASSPGGGDTQYF	TRBV2	TRBJ2-5	9.25218e-06
CASSPGGGNTGQLYF	TRBV2	TRBJ2-2	9.25218e-06
CASSPPGQANSDYTF	TRBV2	TRBJ1-2	9.25218e-06
CASSPPGQGNTEVFF	TRBV2	TRBJ1-1	9.25218e-06
CASSPTGANTGQLYF	TRBV2	TRBJ2-2	9.25218e-06
CASSPTRISNERLFF	TRBV2	TRBJ1-4	9.25218e-06
CASSQAGPQNTLYF	TRBV2	TRBJ2-4	9.25218e-06
CASSQAGQQNSLYF	TRBV2	TRBJ2-4	9.25218e-06
CASSQAGQSNTEVFF	TRBV2	TRBJ1-1	9.25218e-06
CASSQAGRQNTWYF	TRBV2	TRBJ2-4	9.25218e-06
CASSQARSAETLYF	TRBV2	TRBJ2-3	9.25218e-06
CASSQATGGYEQYF	TRBV2	TRBJ2-7	9.25218e-06
CASSQDATYEQYF	TRBV2	TRBJ2-7	9.25218e-06
CASSQDGDWGYEQYF	TRBV2	TRBJ2-7	9.25218e-06
CASSQDGTKNERLFF	TRBV2	TRBJ1-4	9.25218e-06
CASSQDGTNERLFF	TRBV2	TRBJ1-4	9.25218e-06
CASSQDLGAETLYF	TRBV2	TRBJ2-3	9.25218e-06
CASSQDNSGNTLYF	TRBV2	TRBJ1-3	9.25218e-06
CASSQDPGGYEQYF	TRBV2	TRBJ2-7	9.25218e-06
CASSQDPSSYEQYF	TRBV2	TRBJ2-7	9.25218e-06
CASSQDQGSTGQLYF	TRBV2	TRBJ2-2	9.25218e-06
CASSQDQNTLYF	TRBV2	TRBJ2-4	9.25218e-06
CASSQDRAEQFF	TRBV2	TRBJ2-1	9.25218e-06
CASSQDRDKYSGNTLYF	TRBV2	TRBJ1-3	9.25218e-06
CASSQDRDQDTQYF	TRBV2	TRBJ2-5	9.25218e-06
CASSQDRPNTGQLYF	TRBV2	TRBJ2-2	9.25218e-06
CASSQDSANERLFF	TRBV2	TRBJ1-4	9.25218e-06
CASSQDSGAETPYF	TRBV2	TRBJ2-3	9.25218e-06
CASSQDSGPYEQYF	TRBV2	TRBJ2-7	9.25218e-06
CASSQDSNQDTQYF	TRBV2	TRBJ2-5	9.25218e-06
CASSQDSSAEMLCF	TRBV2	TRBJ2-3	9.25218e-06
CASSQDSSTETLHF	TRBV2	TRBJ2-3	9.25218e-06
CASSQDTEVFF	TRBV2	TRBJ1-1	9.25218e-06
CASSQDTNTGQLYF	TRBV2	TRBJ2-2	9.25218e-06
CASSQDWGSQNTLYF	TRBV2	TRBJ2-4	9.25218e-06
CASSQDYGSAETLYF	TRBV2	TRBJ2-3	9.25218e-06
CASSQDYGVAETLYF	TRBV2	TRBJ2-3	9.25218e-06
CASSQDYSGNTLYF	TRBV2	TRBJ1-3	9.25218e-06
CASSQEANTEVFF	TRBV2	TRBJ1-1	9.25218e-06
CASSQEDNYAEQFF	TRBV2	TRBJ2-1	9.25218e-06
CASSQEGGRDAEQFF	TRBV2	TRBJ2-1	9.25218e-06
CASSQEGGYEQYF	TRBV2	TRBJ2-7	9.25218e-06
CASSQEGNTGQLYF	TRBV2	TRBJ2-2	9.25218e-06
CASSQEGQGADTQYF	TRBV2	TRBJ2-5	9.25218e-06
CASSQEGQSQNTLYF	TRBV2	TRBJ2-4	9.25218e-06
CASSQEGTTNSDYPF	TRBV2	TRBJ1-2	9.25218e-06
CASSQEMGNYAEQFF	TRBV2	TRBJ2-1	9.25218e-06
CASSQENWGEDTQYF	TRBV2	TRBJ2-5	9.25218e-06
CASSQEPGQNNERLFF	TRBV2	TRBJ1-4	9.25218e-06
CASSQEPSNERLFF	TRBV2	TRBJ1-4	9.25218e-06
CASSQEQGGYAEQFF	TRBV2	TRBJ2-1	9.25218e-06
CASSQERQQAPLF	TRBV2	TRBJ1-5	9.25218e-06
CASSQESAETLYF	TRBV2	TRBJ2-3	9.25218e-06
CASSQESGNYAEQFF	TRBV2	TRBJ2-1	9.25218e-06
CASSQESGQVTLYF	TRBV2	TRBJ2-4	9.25218e-06
CASSQESQGAGNTLYF	TRBV2	TRBJ1-3	9.25218e-06
CASSQETGVAETLYF	TRBV2	TRBJ2-3	9.25218e-06
CASSQETLYF	TRBV2	TRBJ2-3	9.25218e-06
CASSQGANSDYTF	TRBV2	TRBJ1-2	9.25218e-06
CASSQGDRTEVFF	TRBV2	TRBJ1-1	9.25218e-06
CASSQGGGAAETLYF	TRBV2	TRBJ2-3	9.25218e-06
CASSQGGTTNFDYPF	TRBV2	TRBJ1-2	9.25218e-06
CASSQGGTTNSDFTF	TRBV2	TRBJ1-2	9.25218e-06
CASSQGGTTNSNYPF	TRBV2	TRBJ1-2	9.25218e-06
CASSQGGTTNSVYPF	TRBV2	TRBJ1-2	9.25218e-06
CASSQGGTTYSDYTF	TRBV2	TRBJ1-2	9.25218e-06
CASSQGQGSGNTLYF	TRBV2	TRBJ1-3	9.25218e-06
CASSQGQQDTQYF	TRBV2	TRBJ2-5	9.25218e-06
CASSQGSSAEKLYF	TRBV2	TRBJ2-3	9.25218e-06
CASSQGSSNERLFF	TRBV2	TRBJ1-4	9.25218e-06
CASSQGTGYEQYF	TRBV2	TRBJ2-7	9.25218e-06
CASSQHYAEQFF	TRBV2	TRBJ2-1	9.25218e-06
CASSQMGAHTGQLYF	TRBV2	TRBJ2-2	9.25218e-06
CASSQMGNTEVFF	TRBV2	TRBJ1-1	9.25218e-06
CASSQPGQNYAEQFF	TRBV2	TRBJ2-1	9.25218e-06
CASSQPGRQNTLYF	TRBV2	TRBJ2-4	9.25218e-06
CASSQQDTQYF	TRBV2	TRBJ2-5	9.25218e-06
CASSQQTEYEQYF	TRBV2	TRBJ2-7	9.25218e-06
CASSQRDINQDTQYF	TRBV2	TRBJ2-5	9.25218e-06
CASSQRDSYAEQFF	TRBV2	TRBJ2-1	9.25218e-06
CASSQTGEDTQYF	TRBV2	TRBJ2-5	9.25218e-06
CASSQTGGRQDTQYF	TRBV2	TRBJ2-5	9.25218e-06
CASSQTGIYAEQFF	TRBV2	TRBJ2-1	9.25218e-06
CASSQVPGGIQDTQYF	TRBV2	TRBJ2-5	9.25218e-06
CASSRAGRQNSLYF	TRBV2	TRBJ2-4	9.25218e-06
CASSRDGSSYEQYF	TRBV2	TRBJ2-7	9.25218e-06
CASSRDNSQNTLYF	TRBV2	TRBJ2-4	9.25218e-06
CASSRPGSGDSPLYF	TRBV2	TRBJ1-6	9.25218e-06
CASSRQENTEVFF	TRBV2	TRBJ1-1	9.25218e-06
CASSRQGANTGQLYF	TRBV2	TRBJ2-2	9.25218e-06
CASSRQGRNAEQFF	TRBV2	TRBJ2-1	9.25218e-06
CASSRTGGSQNTLYF	TRBV2	TRBJ2-4	9.25218e-06
CASSRTSQNTLYF	TRBV2	TRBJ2-4	9.25218e-06
CATSQGGTTNSDYTF	TRBV2	TRBJ1-2	9.25218e-06
CGSSQGGTTNSDYTF	TRBV2	TRBJ1-2	9.25218e-06
CACSLLYTNTEVFF	TRBV2	TRBJ1-1	6.16812e-06
CACSRDSSAETLYF	TRBV2	TRBJ2-3	6.16812e-06
CAGGQDSSAETLYF	TRBV2	TRBJ2-3	6.16812e-06
CAGSQDPSAETLYF	TRBV2	TRBJ2-3	6.16812e-06
CAGSQDSSAGTLYF	TRBV2	TRBJ2-3	6.16812e-06
CARSHAGRQNTLYF	TRBV2	TRBJ2-4	6.16812e-06
CARSQARRQNTLYF	TRBV2	TRBJ2-4	6.16812e-06
CARSQDSSAETPYF	TRBV2	TRBJ2-3	6.16812e-06
CASGGGQAPLF	TRBV2	TRBJ1-5	6.16812e-06
CASGLLYTNTEAFF	TRBV2	TRBJ1-1	6.16812e-06
CASGPDSSAETLYF	TRBV2	TRBJ2-3	6.16812e-06
CASGQASSAETLYF	TRBV2	TRBJ2-3	6.16812e-06
CASGQDSGAETLYF	TRBV2	TRBJ2-3	6.16812e-06
CASIQDSSAETLCF	TRBV2	TRBJ2-3	6.16812e-06
CASIQGGTTNSDYTF	TRBV2	TRBJ1-2	6.16812e-06
CASNQDPSAETLYF	TRBV2	TRBJ2-3	6.16812e-06
CASNSAETLYF	TRBV2	TRBJ2-3	6.16812e-06
CASRGQQDTQYF	TRBV2	TRBJ2-5	6.16812e-06
CASRPDSSAETLYF	TRBV2	TRBJ2-3	6.16812e-06
CASRQEGRQNTLYF	TRBV2	TRBJ2-4	6.16812e-06
CASRQGGNTEVFF	TRBV2	TRBJ1-1	6.16812e-06
CASRQGTETLYF	TRBV2	TRBJ2-3	6.16812e-06
CASRTGGSYEQYF	TRBV2	TRBJ2-7	6.16812e-06
CASSADTQDTQYF	TRBV2	TRBJ2-5	6.16812e-06
CASSALGYAEQFF	TRBV2	TRBJ2-1	6.16812e-06
CASSDRERSNQAPLF	TRBV2	TRBJ1-5	6.16812e-06
CASSFGAAGQNTLYF	TRBV2	TRBJ2-4	6.16812e-06
CASSGDNYEQYF	TRBV2	TRBJ2-7	6.16812e-06
CASSHDGGSQNTLYF	TRBV2	TRBJ2-4	6.16812e-06
CASSHDPSAETLYF	TRBV2	TRBJ2-3	6.16812e-06
CASSHDRNQAPLF	TRBV2	TRBJ1-5	6.16812e-06
CASSHDSNERLFF	TRBV2	TRBJ1-4	6.16812e-06
CASSHDSSAETVYF	TRBV2	TRBJ2-3	6.16812e-06
CASSHGQSSYEQYF	TRBV2	TRBJ2-7	6.16812e-06
CASSHGTGLGNTLYF	TRBV2	TRBJ1-3	6.16812e-06
CASSHHGTGTSAETLYF	TRBV2	TRBJ2-3	6.16812e-06
CASSHLGNSGNTLYF	TRBV2	TRBJ1-3	6.16812e-06
CASSHPEGQNTLYF	TRBV2	TRBJ2-4	6.16812e-06
CASSHPGLDNYAEQFF	TRBV2	TRBJ2-1	6.16812e-06
CASSHPGQGKNSDYTF	TRBV2	TRBJ1-2	6.16812e-06
CASSHPQGDTQYF	TRBV2	TRBJ2-5	6.16812e-06
CASSHPTGPQDTQYF	TRBV2	TRBJ2-5	6.16812e-06
CASSHQGAEQFF	TRBV2	TRBJ2-1	6.16812e-06
CASSHWGQDTQYF	TRBV2	TRBJ2-5	6.16812e-06
CASSKGGQGNTEVFF	TRBV2	TRBJ1-1	6.16812e-06
CASSLDRGQDTQYF	TRBV2	TRBJ2-5	6.16812e-06
CASSLGTEKYEQYF	TRBV2	TRBJ2-7	6.16812e-06
CASSLLYANTEVFF	TRBV2	TRBJ1-1	6.16812e-06
CASSLLYTNTEVLF	TRBV2	TRBJ1-1	6.16812e-06
CASSLLYTNTGVFF	TRBV2	TRBJ1-1	6.16812e-06
CASSPAGHANTEVFF	TRBV2	TRBJ1-1	6.16812e-06
CASSPDAEQFF	TRBV2	TRBJ2-1	6.16812e-06
CASSPDNQDTQYF	TRBV2	TRBJ2-5	6.16812e-06
CASSPDSSAEALYF	TRBV2	TRBJ2-3	6.16812e-06
CASSPDWGAGEQYF	TRBV2	TRBJ2-7	6.16812e-06
CASSPGQGEEQYF	TRBV2	TRBJ2-7	6.16812e-06
CASSPKTGGVWTGQLYF	TRBV2	TRBJ2-2	6.16812e-06
CASSPPGGANTGQLYF	TRBV2	TRBJ2-2	6.16812e-06
CASSPPGTEVFF	TRBV2	TRBJ1-1	6.16812e-06
CASSPQGDQDTQYF	TRBV2	TRBJ2-5	6.16812e-06
CASSPQGNYAEQFF	TRBV2	TRBJ2-1	6.16812e-06
CASSPTGDERLFF	TRBV2	TRBJ1-4	6.16812e-06
CASSPTGGQNTLYF	TRBV2	TRBJ2-4	6.16812e-06
CASSPTGRDGQLYF	TRBV2	TRBJ2-2	6.16812e-06
CASSPTSYEQYF	TRBV2	TRBJ2-7	6.16812e-06
CASSPTTSAETLYF	TRBV2	TRBJ2-3	6.16812e-06
CASSPYSSAETLYF	TRBV2	TRBJ2-3	6.16812e-06
CASSQADRNTEVFF	TRBV2	TRBJ1-1	6.16812e-06
CASSQADWSAEQFF	TRBV2	TRBJ2-1	6.16812e-06
CASSQAGASAETLYF	TRBV2	TRBJ2-3	6.16812e-06
CASSQAGGNYAEQFF	TRBV2	TRBJ2-1	6.16812e-06
CASSQAGNNQAPLF	TRBV2	TRBJ1-5	6.16812e-06
CASSQAGRQITLYF	TRBV2	TRBJ2-4	6.16812e-06
CASSQAGRQNGLYF	TRBV2	TRBJ2-4	6.16812e-06
CASSQAGRQNTLYF	TRBV2	TRBJ2-5	6.16812e-06
CASSQAGTGGYEQYF	TRBV2	TRBJ2-7	6.16812e-06
CASSQALGGYEQYF	TRBV2	TRBJ2-7	6.16812e-06
CASSQALSQNTLYF	TRBV2	TRBJ2-4	6.16812e-06
CASSQANSDYTF	TRBV2	TRBJ1-2	6.16812e-06
CASSQAPTGGYAEQFF	TRBV2	TRBJ2-1	6.16812e-06
CASSQARDYEQYF	TRBV2	TRBJ2-7	6.16812e-06
CASSQASAETLYF	TRBV2	TRBJ2-3	6.16812e-06
CASSQASSAATLYF	TRBV2	TRBJ2-3	6.16812e-06
CASSQAVAEQFF	TRBV2	TRBJ2-1	6.16812e-06
CASSQAWGETLYF	TRBV2	TRBJ2-3	6.16812e-06
CASSQDAGPYEQYF	TRBV2	TRBJ2-7	6.16812e-06
CASSQDAGYEQYF	TRBV2	TRBJ2-7	6.16812e-06
CASSQDALLNYAEQFF	TRBV2	TRBJ2-1	6.16812e-06
CASSQDDIYEQYF	TRBV2	TRBJ2-7	6.16812e-06
CASSQDDNTEVFF	TRBV2	TRBJ1-1	6.16812e-06
CASSQDDSQNTLYF	TRBV2	TRBJ2-4	6.16812e-06
CASSQDDWGKYEQYF	TRBV2	TRBJ2-7	6.16812e-06
CASSQDEQYF	TRBV2	TRBJ2-7	6.16812e-06
CASSQDERLFF	TRBV2	TRBJ1-4	6.16812e-06
CASSQDFEQYF	TRBV2	TRBJ2-7	6.16812e-06
CASSQDGEGSDYTF	TRBV2	TRBJ1-2	6.16812e-06
CASSQDGGAGNTLYF	TRBV2	TRBJ1-3	6.16812e-06
CASSQDGGASSDYTF	TRBV2	TRBJ1-2	6.16812e-06
CASSQDGGATEQFF	TRBV2	TRBJ2-1	6.16812e-06
CASSQDGGLSSYEQYF	TRBV2	TRBJ2-7	6.16812e-06
CASSQDGGSQNTLYF	TRBV2	TRBJ2-4	6.16812e-06
CASSQDGNSGNTLYF	TRBV2	TRBJ1-3	6.16812e-06
CASSQDGQGASEQYF	TRBV2	TRBJ2-7	6.16812e-06
CASSQDGQGYSDYTF	TRBV2	TRBJ1-2	6.16812e-06
CASSQDGQYAEQFF	TRBV2	TRBJ2-1	6.16812e-06
CASSQDGSAETPYF	TRBV2	TRBJ2-3	6.16812e-06
CASSQDGSGQLYF	TRBV2	TRBJ2-2	6.16812e-06
CASSQDGSNERLFF	TRBV2	TRBJ1-4	6.16812e-06
CASSQDGTIQDTQYF	TRBV2	TRBJ2-5	6.16812e-06
CASSQDGWGSQNTLYF	TRBV2	TRBJ2-4	6.16812e-06
CASSQDHREGSDYTF	TRBV2	TRBJ1-2	6.16812e-06
CASSQDHSQNTLYF	TRBV2	TRBJ2-4	6.16812e-06
CASSQDHWGNTGQLYF	TRBV2	TRBJ2-2	6.16812e-06
CASSQDIQGWSEQFF	TRBV2	TRBJ2-1	6.16812e-06
CASSQDLDSGNTLYF	TRBV2	TRBJ1-3	6.16812e-06
CASSQDLGAGNTLYF	TRBV2	TRBJ1-3	6.16812e-06
CASSQDLSGQLYF	TRBV2	TRBJ2-2	6.16812e-06
CASSQDMGVEQYF	TRBV2	TRBJ2-7	6.16812e-06
CASSQDNNERLFF	TRBV2	TRBJ1-4	6.16812e-06
CASSQDPANTEVFF	TRBV2	TRBJ1-1	6.16812e-06
CASSQDPGANSDYTF	TRBV2	TRBJ1-2	6.16812e-06
CASSQDPGDQDTQYF	TRBV2	TRBJ2-5	6.16812e-06
CASSQDPGGAETLYF	TRBV2	TRBJ2-3	6.16812e-06
CASSQDPGGAYEQYF	TRBV2	TRBJ2-7	6.16812e-06
CASSQDPGGNSDYTF	TRBV2	TRBJ1-2	6.16812e-06
CASSQDPGVSYEQYF	TRBV2	TRBJ2-7	6.16812e-06
CASSQDPNSDYTF	TRBV2	TRBJ1-2	6.16812e-06
CASSQDPNTGQLYF	TRBV2	TRBJ2-2	6.16812e-06
CASSQDPQANTEVFF	TRBV2	TRBJ1-1	6.16812e-06
CASSQDPSAEMLYF	TRBV2	TRBJ2-3	6.16812e-06
CASSQDPSNTGQLYF	TRBV2	TRBJ2-2	6.16812e-06
CASSQDPSQNTLYF	TRBV2	TRBJ2-4	6.16812e-06
CASSQDPSTETLYF	TRBV2	TRBJ2-3	6.16812e-06
CASSQDPTSQNTLYF	TRBV2	TRBJ2-4	6.16812e-06
CASSQDPWTGGYEQYF	TRBV2	TRBJ2-7	6.16812e-06
CASSQDQANTGQLYF	TRBV2	TRBJ2-2	6.16812e-06
CASSQDQGWDTQYF	TRBV2	TRBJ2-5	6.16812e-06
CASSQDQIQDTQYF	TRBV2	TRBJ2-5	6.16812e-06
CASSQDRADYTF	TRBV2	TRBJ1-2	6.16812e-06
CASSQDRANTEVFF	TRBV2	TRBJ1-1	6.16812e-06
CASSQDRDWAYEQYF	TRBV2	TRBJ2-7	6.16812e-06
CASSQDRGAETLYF	TRBV2	TRBJ2-3	6.16812e-06
CASSQDRGQNTLYF	TRBV2	TRBJ2-4	6.16812e-06
CASSQDRGSAETLYF	TRBV2	TRBJ2-3	6.16812e-06
CASSQDRGSGNTLYF	TRBV2	TRBJ1-3	6.16812e-06
CASSQDRISNERLFF	TRBV2	TRBJ1-4	6.16812e-06
CASSQDRNERLFF	TRBV2	TRBJ1-4	6.16812e-06
CASSQDRSQNTLYF	TRBV2	TRBJ2-4	6.16812e-06
CASSQDRSSYEQYF	TRBV2	TRBJ2-7	6.16812e-06
CASSQDRTGGYAEQFF	TRBV2	TRBJ2-1	6.16812e-06
CASSQDSGADTLYF	TRBV2	TRBJ2-3	6.16812e-06
CASSQDSGAEALYF	TRBV2	TRBJ2-3	6.16812e-06
CASSQDSGEETLYF	TRBV2	TRBJ2-3	6.16812e-06
CASSQDSGGYEQYF	TRBV2	TRBJ2-7	6.16812e-06
CASSQDSGNTLYF	TRBV2	TRBJ1-3	6.16812e-06
CASSQDSNSYNSPLYF	TRBV2	TRBJ1-6	6.16812e-06
CASSQDSSAATLSF	TRBV2	TRBJ2-3	6.16812e-06
CASSQDSSDERLFF	TRBV2	TRBJ1-4	6.16812e-06
CASSQDSSNGRLFF	TRBV2	TRBJ1-4	6.16812e-06
CASSQDSSVEMLYF	TRBV2	TRBJ2-3	6.16812e-06
CASSQDSYAEQFF	TRBV2	TRBJ2-1	6.16812e-06
CASSQDTGRDTQYF	TRBV2	TRBJ2-5	6.16812e-06
CASSQDTVSGNTLYF	TRBV2	TRBJ1-3	6.16812e-06
CASSQDWDAEQFF	TRBV2	TRBJ2-1	6.16812e-06
CASSQDWGDSYEQYF	TRBV2	TRBJ2-7	6.16812e-06
CASSQDWGEDTQYF	TRBV2	TRBJ2-5	6.16812e-06
CASSQDWGGQNTLYF	TRBV2	TRBJ2-4	6.16812e-06
CASSQDWGVAETLYF	TRBV2	TRBJ2-3	6.16812e-06
CASSQDWLSGNTLYF	TRBV2	TRBJ1-3	6.16812e-06
CASSQDYAEQFF	TRBV2	TRBJ2-1	6.16812e-06
CASSQDYGAGNTLYF	TRBV2	TRBJ1-3	6.16812e-06
CASSQDYSYEQYF	TRBV2	TRBJ2-7	6.16812e-06
CASSQDYWGGGNTQYF	TRBV2	TRBJ2-5	6.16812e-06
CASSQEAGHINTLYF	TRBV2	TRBJ2-4	6.16812e-06
CASSQEDRGNSDYTF	TRBV2	TRBJ1-2	6.16812e-06
CASSQEDWGGVDTQYF	TRBV2	TRBJ2-5	6.16812e-06
CASSQEEGYYAEQFF	TRBV2	TRBJ2-1	6.16812e-06
CASSQEGASAETLYF	TRBV2	TRBJ2-3	6.16812e-06
CASSQEGDTQYF	TRBV2	TRBJ2-5	6.16812e-06
CASSQEGGAPLF	TRBV2	TRBJ1-5	6.16812e-06
CASSQEGGLTF	TRBV2	TRBJ1-2	6.16812e-06
CASSQEGGNTGQLYF	TRBV2	TRBJ2-2	6.16812e-06
CASSQEGGNYAEQFF	TRBV2	TRBJ2-1	6.16812e-06
CASSQEGGYYAEQFF	TRBV2	TRBJ2-1	6.16812e-06
CASSQEGINSDYTF	TRBV2	TRBJ1-2	6.16812e-06
CASSQEGLGVDTQYF	TRBV2	TRBJ2-5	6.16812e-06
CASSQEGLSAETLYF	TRBV2	TRBJ2-3	6.16812e-06
CASSQEGNQDTQYF	TRBV2	TRBJ2-5	6.16812e-06
CASSQEGQDTQYF	TRBV2	TRBJ2-5	6.16812e-06
CASSQEGQGAAETLYF	TRBV2	TRBJ2-3	6.16812e-06
CASSQEGQNNERLFF	TRBV2	TRBJ1-4	6.16812e-06
CASSQEGQNSGNTLYF	TRBV2	TRBJ1-3	6.16812e-06
CASSQEGQNTGQLYF	TRBV2	TRBJ2-2	6.16812e-06
CASSQEGQSNERLFF	TRBV2	TRBJ1-4	6.16812e-06
CASSQEGREQFF	TRBV2	TRBJ2-1	6.16812e-06
CASSQEGSSAETLYF	TRBV2	TRBJ2-3	6.16812e-06
CASSQEGSSDYTF	TRBV2	TRBJ1-2	6.16812e-06
CASSQEGTGEVFF	TRBV2	TRBJ1-1	6.16812e-06
CASSQEGTGGAEQFF	TRBV2	TRBJ2-1	6.16812e-06
CASSQEGTGGEQYF	TRBV2	TRBJ2-7	6.16812e-06
CASSQEGTGNERLFF	TRBV2	TRBJ1-4	6.16812e-06
CASSQEGTKDTQYF	TRBV2	TRBJ2-5	6.16812e-06
CASSQEGYAEQFF	TRBV2	TRBJ2-1	6.16812e-06
CASSQEHF	TRBV2	TRBJ2-3	6.16812e-06
CASSQELGVTLYF	TRBV2	TRBJ2-3	6.16812e-06
CASSQENNNQAPLF	TRBV2	TRBJ1-5	6.16812e-06
CASSQEPGNYAEQFF	TRBV2	TRBJ2-1	6.16812e-06
CASSQEPGQNTEVFF	TRBV2	TRBJ1-1	6.16812e-06
CASSQEPISNERLFF	TRBV2	TRBJ1-4	6.16812e-06
CASSQERANTEVFF	TRBV2	TRBJ1-1	6.16812e-06
CASSQERGNTLYF	TRBV2	TRBJ2-4	6.16812e-06
CASSQERGNYAEQFF	TRBV2	TRBJ2-1	6.16812e-06
CASSQERTGGYEQYF	TRBV2	TRBJ2-7	6.16812e-06
CASSQESRANTGQLYF	TRBV2	TRBJ2-2	6.16812e-06
CASSQETGDSYEQYF	TRBV2	TRBJ2-7	6.16812e-06
CASSQETNTEVFF	TRBV2	TRBJ1-1	6.16812e-06
CASSQETSAETLYF	TRBV2	TRBJ2-3	6.16812e-06
CASSQEVGNTGQLYF	TRBV2	TRBJ2-2	6.16812e-06
CASSQEVSGNTLYF	TRBV2	TRBJ1-3	6.16812e-06
CASSQEVTEDTQYF	TRBV2	TRBJ2-5	6.16812e-06
CASSQEWDNYEQYF	TRBV2	TRBJ2-7	6.16812e-06
CASSQEWDWGGEQYF	TRBV2	TRBJ2-7	6.16812e-06
CASSQEWTGGDTQYF	TRBV2	TRBJ2-5	6.16812e-06
CASSQGANTGQLYF	TRBV2	TRBJ2-2	6.16812e-06
CASSQGAPTNSDYTF	TRBV2	TRBJ1-2	6.16812e-06
CASSQGAQNTLYF	TRBV2	TRBJ2-4	6.16812e-06
CASSQGDNQDTQYF	TRBV2	TRBJ2-5	6.16812e-06
CASSQGDSYAEQFF	TRBV2	TRBJ2-1	6.16812e-06
CASSQGGAKNSDYTF	TRBV2	TRBJ1-2	6.16812e-06
CASSQGGATNSDYIF	TRBV2	TRBJ1-2	6.16812e-06
CASSQGGDWGFAEQFF	TRBV2	TRBJ2-1	6.16812e-06
CASSQGGGENTLYF	TRBV2	TRBJ2-4	6.16812e-06
CASSQGGGYAEQFF	TRBV2	TRBJ2-1	6.16812e-06
CASSQGGLGVEQYF	TRBV2	TRBJ2-7	6.16812e-06
CASSQGGLGYAEQFF	TRBV2	TRBJ2-1	6.16812e-06
CASSQGGPANSDYTF	TRBV2	TRBJ1-2	6.16812e-06
CASSQGGQNTLYF	TRBV2	TRBJ2-4	6.16812e-06
CASSQGGRTNSDYPF	TRBV2	TRBJ1-2	6.16812e-06
CASSQGGSAETLYF	TRBV2	TRBJ2-3	6.16812e-06
CASSQGGTINSDYAF	TRBV2	TRBJ1-2	6.16812e-06
CASSQGGTTDSDYPF	TRBV2	TRBJ1-2	6.16812e-06
CASSQGGTTNADYTF	TRBV2	TRBJ1-2	6.16812e-06
CASSQGGVDTLYF	TRBV2	TRBJ2-4	6.16812e-06
CASSQGLGENTLYF	TRBV2	TRBJ2-4	6.16812e-06
CASSQGNSDYTF	TRBV2	TRBJ1-2	6.16812e-06
CASSQGQEDTQYF	TRBV2	TRBJ2-5	6.16812e-06
CASSQGQNYAEQFF	TRBV2	TRBJ2-1	6.16812e-06
CASSQGQSNERLFF	TRBV2	TRBJ1-4	6.16812e-06
CASSQGQYAEQFF	TRBV2	TRBJ2-1	6.16812e-06
CASSQGRSAETLYF	TRBV2	TRBJ2-3	6.16812e-06
CASSQGRTTNSDYPF	TRBV2	TRBJ1-2	6.16812e-06
CASSQGSGAETLYF	TRBV2	TRBJ2-3	6.16812e-06
CASSQGSRQVYEQYF	TRBV2	TRBJ2-7	6.16812e-06
CASSQGSSAEALYF	TRBV2	TRBJ2-3	6.16812e-06
CASSQGSSAEMLYF	TRBV2	TRBJ2-3	6.16812e-06
CASSQGTAETLYF	TRBV2	TRBJ2-3	6.16812e-06
CASSQGTANERLFF	TRBV2	TRBJ1-4	6.16812e-06
CASSQGTASAETLYF	TRBV2	TRBJ2-3	6.16812e-06
CASSQGTGDQNTLYF	TRBV2	TRBJ2-4	6.16812e-06
CASSQGTGGAQYAEQFF	TRBV2	TRBJ2-1	6.16812e-06
CASSQGTGGNYAEQFF	TRBV2	TRBJ2-1	6.16812e-06
CASSQGTGGQDTQYF	TRBV2	TRBJ2-5	6.16812e-06
CASSQGTGRNQAPLF	TRBV2	TRBJ1-5	6.16812e-06
CASSQGTISNERLFF	TRBV2	TRBJ1-4	6.16812e-06
CASSQGTTNSDYTF	TRBV2	TRBJ1-2	6.16812e-06
CASSQGWGETLYF	TRBV2	TRBJ2-3	6.16812e-06
CASSQHSISQNTLYF	TRBV2	TRBJ2-4	6.16812e-06
CASSQIQGGQDTQYF	TRBV2	TRBJ2-5	6.16812e-06
CASSQISAETLYF	TRBV2	TRBJ2-3	6.16812e-06
CASSQKDTQYF	TRBV2	TRBJ2-5	6.16812e-06
CASSQLGNQDTQYF	TRBV2	TRBJ2-5	6.16812e-06
CASSQLGQQDTQYF	TRBV2	TRBJ2-5	6.16812e-06
CASSQLQGGDSDYPF	TRBV2	TRBJ1-2	6.16812e-06
CASSQNQDTQYF	TRBV2	TRBJ2-5	6.16812e-06
CASSQNSPANSDYTF	TRBV2	TRBJ1-2	6.16812e-06
CASSQNWGDYAEQFF	TRBV2	TRBJ2-1	6.16812e-06
CASSQNWGSETLYF	TRBV2	TRBJ2-3	6.16812e-06
CASSQNWVQDTQYF	TRBV2	TRBJ2-5	6.16812e-06
CASSQPGDQDTQYF	TRBV2	TRBJ2-5	6.16812e-06
CASSQPGDRTEVFF	TRBV2	TRBJ1-1	6.16812e-06
CASSQPGGDTQYF	TRBV2	TRBJ2-5	6.16812e-06
CASSQPGGNQDTQYF	TRBV2	TRBJ2-5	6.16812e-06
CASSQPGLGVYEQYF	TRBV2	TRBJ2-7	6.16812e-06
CASSQPGQTNSDYPF	TRBV2	TRBJ1-2	6.16812e-06
CASSQPGQTNSDYTF	TRBV2	TRBJ1-2	6.16812e-06
CASSQPQGANTGQLYF	TRBV2	TRBJ2-2	6.16812e-06
CASSQPQTSGNTLYF	TRBV2	TRBJ1-3	6.16812e-06
CASSQPTGGNSPLYF	TRBV2	TRBJ1-6	6.16812e-06
CASSQQGDGNTLYF	TRBV2	TRBJ1-3	6.16812e-06
CASSQQGNAETLYF	TRBV2	TRBJ2-3	6.16812e-06
CASSQQGNNQAPLF	TRBV2	TRBJ1-5	6.16812e-06
CASSQQGNTEVFF	TRBV2	TRBJ1-1	6.16812e-06
CASSQQGSYEQYF	TRBV2	TRBJ2-7	6.16812e-06
CASSQQMNSGNTLYF	TRBV2	TRBJ1-3	6.16812e-06
CASSQQTSAETLYF	TRBV2	TRBJ2-3	6.16812e-06
CASSQRDKTSAETLYF	TRBV2	TRBJ2-3	6.16812e-06
CASSQRDRGYAEQFF	TRBV2	TRBJ2-1	6.16812e-06
CASSQRGAGNTLYF	TRBV2	TRBJ1-3	6.16812e-06
CASSQRTGDSYEQYF	TRBV2	TRBJ2-7	6.16812e-06
CASSQSGGAMREQYF	TRBV2	TRBJ2-7	6.16812e-06
CASSQSGGTNTGQLYF	TRBV2	TRBJ2-2	6.16812e-06
CASSQSGQNNQDTQYF	TRBV2	TRBJ2-5	6.16812e-06
CASSQSGRQNTLYF	TRBV2	TRBJ2-4	6.16812e-06
CASSQSGTGDAEQFF	TRBV2	TRBJ2-1	6.16812e-06
CASSQSGTGHSDYTF	TRBV2	TRBJ1-2	6.16812e-06
CASSQSGTGKYEQYF	TRBV2	TRBJ2-7	6.16812e-06
CASSQSQYTEVFF	TRBV2	TRBJ1-1	6.16812e-06
CASSQTDNNQAPLF	TRBV2	TRBJ1-5	6.16812e-06
CASSQTDNQDTQYF	TRBV2	TRBJ2-5	6.16812e-06
CASSQTGDGNTLYF	TRBV2	TRBJ1-3	6.16812e-06
CASSQTGDSYEQYF	TRBV2	TRBJ2-7	6.16812e-06
CASSQTGGANSPLYF	TRBV2	TRBJ1-6	6.16812e-06
CASSQTGGDERLFF	TRBV2	TRBJ1-4	6.16812e-06
CASSQTGGGNSPLYF	TRBV2	TRBJ1-6	6.16812e-06
CASSQTGGQNTLYF	TRBV2	TRBJ2-4	6.16812e-06
CASSQTGNQDTQYF	TRBV2	TRBJ2-5	6.16812e-06
CASSQTGNTEVFF	TRBV2	TRBJ1-1	6.16812e-06
CASSQTGSQNTLYF	TRBV2	TRBJ2-4	6.16812e-06
CASSQTGTGDTEVFF	TRBV2	TRBJ1-1	6.16812e-06
CASSQVDWGSQNTLYF	TRBV2	TRBJ2-4	6.16812e-06
CASSQVGGYEQYF	TRBV2	TRBJ2-7	6.16812e-06
CASSQVGQNYAEQFF	TRBV2	TRBJ2-1	6.16812e-06
CASSQVGSGNTLYF	TRBV2	TRBJ1-3	6.16812e-06
CASSQVSAETLYF	TRBV2	TRBJ2-3	6.16812e-06
CASSQWDNSETLYF	TRBV2	TRBJ2-3	6.16812e-06
CASSQWDRGAEQFF	TRBV2	TRBJ2-1	6.16812e-06
CASSQWTANTEVFF	TRBV2	TRBJ1-1	6.16812e-06
CASSQWTGNTEVFF	TRBV2	TRBJ1-1	6.16812e-06
CASSRDCSAETLYF	TRBV2	TRBJ2-3	6.16812e-06
CASSRDIAETLYF	TRBV2	TRBJ2-3	6.16812e-06
CASSRDIYEQYF	TRBV2	TRBJ2-7	6.16812e-06
CASSRDKNTGQLYF	TRBV2	TRBJ2-2	6.16812e-06
CASSRDRDRGDEQYF	TRBV2	TRBJ2-7	6.16812e-06
CASSRDRDTQYF	TRBV2	TRBJ2-5	6.16812e-06
CASSRDRDTRYF	TRBV2	TRBJ2-5	6.16812e-06
CASSRDRSDTQYF	TRBV2	TRBJ2-5	6.16812e-06
CASSRDSAETLYF	TRBV2	TRBJ2-3	6.16812e-06
CASSRDSSNERLFF	TRBV2	TRBJ1-4	6.16812e-06
CASSRDSTAETLYF	TRBV2	TRBJ2-3	6.16812e-06
CASSRGGPSYEQYF	TRBV2	TRBJ2-7	6.16812e-06
CASSRGSSAETLYF	TRBV2	TRBJ2-3	6.16812e-06
CASSRQGQNTLYF	TRBV2	TRBJ2-4	6.16812e-06
CASSRQSNQDTQYF	TRBV2	TRBJ2-5	6.16812e-06
CASSRTETLYF	TRBV2	TRBJ2-3	6.16812e-06
CASSRTGGDTQYF	TRBV2	TRBJ2-5	6.16812e-06
CASSRTGGENTLYF	TRBV2	TRBJ2-4	6.16812e-06
CASSRTNNQAPLF	TRBV2	TRBJ1-5	6.16812e-06
CASSSGQANTEVFF	TRBV2	TRBJ1-1	6.16812e-06
CASSVLYTNTEVFF	TRBV2	TRBJ1-1	6.16812e-06
CASSVRGAIEQYF	TRBV2	TRBJ2-7	6.16812e-06
CASSWASSAETLYF	TRBV2	TRBJ2-3	6.16812e-06
CASTQAGRQNTLYF	TRBV2	TRBJ2-4	6.16812e-06
CASVPGAETLYF	TRBV2	TRBJ2-3	6.16812e-06
CDSSLLYTNTEVFF	TRBV2	TRBJ1-1	6.16812e-06
CGSSQAGRQNTLYF	TRBV2	TRBJ2-4	6.16812e-06
CTRSQDSSAETLYF	TRBV2	TRBJ2-3	6.16812e-06
CVSSQDSSAEALYF	TRBV2	TRBJ2-3	6.16812e-06
CACSQDSGAETLYF	TRBV2	TRBJ2-3	3.08406e-06
CACSQDSSADTLYF	TRBV2	TRBJ2-3	3.08406e-06
CACSQDSSNERLFF	TRBV2	TRBJ1-4	3.08406e-06
CACSQDWDSQDTQYF	TRBV2	TRBJ2-5	3.08406e-06
CACSQGGATNSDYTF	TRBV2	TRBJ1-2	3.08406e-06
CACSQGGTTNSDHPF	TRBV2	TRBJ1-2	3.08406e-06
CACSQGGTTSSDYPF	TRBV2	TRBJ1-2	3.08406e-06
CACSQPGGSSYEQYF	TRBV2	TRBJ2-7	3.08406e-06
CACSRGANTGQLYF	TRBV2	TRBJ2-2	3.08406e-06
CAGDSAETLYF	TRBV2	TRBJ2-3	3.08406e-06
CAGNRGDQDTQYF	TRBV2	TRBJ2-5	3.08406e-06
CAGSHRLGAQDTQYF	TRBV2	TRBJ2-5	3.08406e-06
CAGSPGPSQNTLYF	TRBV2	TRBJ2-4	3.08406e-06
CAGSPTGQNTEVFF	TRBV2	TRBJ1-1	3.08406e-06
CAGSQAGRQNTSYF	TRBV2	TRBJ2-4	3.08406e-06
CAGSQDNSAETLYF	TRBV2	TRBJ2-3	3.08406e-06
CAGSQDSSAETPYF	TRBV2	TRBJ2-3	3.08406e-06
CAGSQDTEYEQYF	TRBV2	TRBJ2-7	3.08406e-06
CAGSQDVGVGNTLYF	TRBV2	TRBJ1-3	3.08406e-06
CAGSQGGTTNPDYTF	TRBV2	TRBJ1-2	3.08406e-06
CAGSQGGTTNSDHTF	TRBV2	TRBJ1-2	3.08406e-06
CAGSQNNERLFF	TRBV2	TRBJ1-4	3.08406e-06
CAGSQRIVAETLYF	TRBV2	TRBJ2-3	3.08406e-06
CAGSRDWGDQDTQYF	TRBV2	TRBJ2-5	3.08406e-06
CAINQDSSAETLYF	TRBV2	TRBJ2-3	3.08406e-06
CAISLLYTNTEVFF	TRBV2	TRBJ1-1	3.08406e-06
CAISQDCSAETLYF	TRBV2	TRBJ2-3	3.08406e-06
CAISQDSSAGTLYF	TRBV2	TRBJ2-3	3.08406e-06
CANSHPDWASAETLYF	TRBV2	TRBJ2-3	3.08406e-06
CANSQDAQTEVFF	TRBV2	TRBJ1-1	3.08406e-06
CANSQDSGAETLYF	TRBV2	TRBJ2-3	3.08406e-06
CANSQDSSTETLYF	TRBV2	TRBJ2-3	3.08406e-06
CANSQDWDSQDTQYF	TRBV2	TRBJ2-5	3.08406e-06
CARGDKSSGNTLYF	TRBV2	TRBJ1-3	3.08406e-06
CARPQNTLYF	TRBV2	TRBJ2-4	3.08406e-06
CARRQEGGKAEQFF	TRBV2	TRBJ2-1	3.08406e-06
CARSESGRQNTLYF	TRBV2	TRBJ2-4	3.08406e-06
CARSHEQISGNTLSF	TRBV2	TRBJ1-3	3.08406e-06
CARSLGQYAEQFF	TRBV2	TRBJ2-1	3.08406e-06
CARSPGGTTNSDYTF	TRBV2	TRBJ1-2	3.08406e-06
CARSPQGAETLYF	TRBV2	TRBJ2-3	3.08406e-06
CARSPQGNYAEQFF	TRBV2	TRBJ2-1	3.08406e-06
CARSPRGGRNSDYTF	TRBV2	TRBJ1-2	3.08406e-06
CARSQAAGRGNTLYF	TRBV2	TRBJ1-3	3.08406e-06
CARSQAGRQNSLYF	TRBV2	TRBJ2-4	3.08406e-06
CARSQATGDQNTLYF	TRBV2	TRBJ2-4	3.08406e-06
CARSQDGSAETLYF	TRBV2	TRBJ2-3	3.08406e-06
CARSQDPSNSDYTF	TRBV2	TRBJ1-2	3.08406e-06
CARSQDSSVETLYF	TRBV2	TRBJ2-3	3.08406e-06
CARSQDTEYEQYF	TRBV2	TRBJ2-7	3.08406e-06
CARSQDWGAEQFF	TRBV2	TRBJ2-1	3.08406e-06
CARSQDYRGGNTLYF	TRBV2	TRBJ1-3	3.08406e-06
CARSQEDWGGYEQYF	TRBV2	TRBJ2-7	3.08406e-06
CARSQGGGASAETLYF	TRBV2	TRBJ2-3	3.08406e-06
CARSQGGGGARREQYF	TRBV2	TRBJ2-7	3.08406e-06
CARSQGGTINSDYTF	TRBV2	TRBJ1-2	3.08406e-06
CARSQVGSQDTQYF	TRBV2	TRBJ2-5	3.08406e-06
CARSRDWGDQDTQYF	TRBV2	TRBJ2-5	3.08406e-06
CARSXDSSAETLYF	TRBV2	TRBJ2-3	3.08406e-06
CASAAGTDYAEQFF	TRBV2	TRBJ2-1	3.08406e-06
CASAGIQDTQYF	TRBV2	TRBJ2-5	3.08406e-06
CASAREGSDYTF	TRBV2	TRBJ1-2	3.08406e-06
CASCQGGTTNSDYPF	TRBV2	TRBJ1-2	3.08406e-06
CASCQGGTTNSDYTF	TRBV2	TRBJ1-2	3.08406e-06
CASEAGWAEQFF	TRBV2	TRBJ2-1	3.08406e-06
CASGLLYTNTEVFF	TRBV2	TRBJ1-1	3.08406e-06
CASGPGTGGYEQYF	TRBV2	TRBJ2-7	3.08406e-06
CASGQAGWQNTLYF	TRBV2	TRBJ2-4	3.08406e-06
CASGQDGSAETLYF	TRBV2	TRBJ2-3	3.08406e-06
CASGQDSRAETLYF	TRBV2	TRBJ2-3	3.08406e-06
CASGQDSSAEMLYF	TRBV2	TRBJ2-3	3.08406e-06
CASGQDSSAETLHF	TRBV2	TRBJ2-3	3.08406e-06
CASGQDSSAETQYF	TRBV2	TRBJ2-3	3.08406e-06
CASGQDSSAGTLYF	TRBV2	TRBJ2-3	3.08406e-06
CASGQDSSNERLFF	TRBV2	TRBJ1-4	3.08406e-06
CASGQDWAETLYF	TRBV2	TRBJ2-3	3.08406e-06
CASGQEGGLGTGQLYF	TRBV2	TRBJ2-2	3.08406e-06
CASGQEHTEVFF	TRBV2	TRBJ1-1	3.08406e-06
CASGQEKTGGSDYTF	TRBV2	TRBJ1-2	3.08406e-06
CASGQESGRDTQYF	TRBV2	TRBJ2-5	3.08406e-06
CASGQESSNERLFF	TRBV2	TRBJ1-4	3.08406e-06
CASGQNSSAETLYF	TRBV2	TRBJ2-3	3.08406e-06
CASGQTGGANTGQLYF	TRBV2	TRBJ2-2	3.08406e-06
CASGRDSSAETLYF	TRBV2	TRBJ2-3	3.08406e-06
CASGRDWGAETLYF	TRBV2	TRBJ2-3	3.08406e-06
CASGSSGTTYNSPLYF	TRBV2	TRBJ1-6	3.08406e-06
CASGTGENTGQLYF	TRBV2	TRBJ2-2	3.08406e-06
CASGTGGLNTLYF	TRBV2	TRBJ2-4	3.08406e-06
CASGTGQGGGNTLYF	TRBV2	TRBJ1-3	3.08406e-06
CASIGWGSAETLYF	TRBV2	TRBJ2-3	3.08406e-06
CASIQAGGAGQNTLYF	TRBV2	TRBJ2-4	3.08406e-06
CASIQEGGAETLYF	TRBV2	TRBJ2-3	3.08406e-06
CASIWGSAETLYF	TRBV2	TRBJ2-3	3.08406e-06
CASKLGYEQYF	TRBV2	TRBJ2-7	3.08406e-06
CASNQDSSAETLCF	TRBV2	TRBJ2-3	3.08406e-06
CASNQDSSAVTLYF	TRBV2	TRBJ2-3	3.08406e-06
CASNQGGATNSDYTF	TRBV2	TRBJ1-2	3.08406e-06
CASNQGSSAETLYF	TRBV2	TRBJ2-3	3.08406e-06
CASNQNTEVFF	TRBV2	TRBJ1-1	3.08406e-06
CASNRLGKNTLYF	TRBV2	TRBJ2-4	3.08406e-06
CASNRQGAYAEQFF	TRBV2	TRBJ2-1	3.08406e-06
CASNRQGSYEQYF	TRBV2	TRBJ2-7	3.08406e-06
CASRATGGYEQYF	TRBV2	TRBJ2-7	3.08406e-06
CASRDRNQDTQYF	TRBV2	TRBJ2-5	3.08406e-06
CASRGLGAETLYF	TRBV2	TRBJ2-3	3.08406e-06
CASRGPSNTGQLYF	TRBV2	TRBJ2-2	3.08406e-06
CASRGTGAYEQYF	TRBV2	TRBJ2-7	3.08406e-06
CASRGTGIAETLYF	TRBV2	TRBJ2-3	3.08406e-06
CASRKTGDSYEQYF	TRBV2	TRBJ2-7	3.08406e-06
CASRKTGTDTEVFF	TRBV2	TRBJ1-1	3.08406e-06
CASRKWDRGYAEQFF	TRBV2	TRBJ2-1	3.08406e-06
CASRNPVNYAEQFF	TRBV2	TRBJ2-1	3.08406e-06
CASRPGTANTEVFF	TRBV2	TRBJ1-1	3.08406e-06
CASRPTGSKNTLYF	TRBV2	TRBJ2-4	3.08406e-06
CASRPWGGASYEQYF	TRBV2	TRBJ2-7	3.08406e-06
CASRQAGRQNTLHF	TRBV2	TRBJ2-4	3.08406e-06
CASRQDAGEGTQYF	TRBV2	TRBJ2-5	3.08406e-06
CASRQDGTANSDYTF	TRBV2	TRBJ1-2	3.08406e-06
CASRQDRNERLFF	TRBV2	TRBJ1-4	3.08406e-06
CASRQDSGAETLYF	TRBV2	TRBJ2-3	3.08406e-06
CASRQDSSAETLCF	TRBV2	TRBJ2-3	3.08406e-06
CASRQDSSAGTLYF	TRBV2	TRBJ2-3	3.08406e-06
CASRQDTQYF	TRBV2	TRBJ2-5	3.08406e-06
CASRQDWGSQNTLYF	TRBV2	TRBJ2-4	3.08406e-06
CASRQEKTGGSDYPF	TRBV2	TRBJ1-2	3.08406e-06
CASRQERDTQYF	TRBV2	TRBJ2-5	3.08406e-06
CASRQETGGKDTQYF	TRBV2	TRBJ2-5	3.08406e-06
CASRQETLYF	TRBV2	TRBJ2-3	3.08406e-06
CASRQEWGGGQDTQYF	TRBV2	TRBJ2-5	3.08406e-06
CASRQGGQDTQYF	TRBV2	TRBJ2-5	3.08406e-06
CASRQGGTTNSDHTF	TRBV2	TRBJ1-2	3.08406e-06
CASRQGGTTNSDYAF	TRBV2	TRBJ1-2	3.08406e-06
CASRQGLANTEVFF	TRBV2	TRBJ1-1	3.08406e-06
CASRQGRANTEVFF	TRBV2	TRBJ1-1	3.08406e-06
CASRQGTNTEVFF	TRBV2	TRBJ1-1	3.08406e-06
CASRQLGGSYEQYF	TRBV2	TRBJ2-7	3.08406e-06
CASRQVGNQNTLYF	TRBV2	TRBJ2-4	3.08406e-06
CASRQYRGQAPLF	TRBV2	TRBJ1-5	3.08406e-06
CASRRDRGYEQYF	TRBV2	TRBJ2-7	3.08406e-06
CASRRDSSGNTLYF	TRBV2	TRBJ1-3	3.08406e-06
CASRRQGEDTQYF	TRBV2	TRBJ2-5	3.08406e-06
CASRRTGQNTLYF	TRBV2	TRBJ2-4	3.08406e-06
CASRSTSNERLFF	TRBV2	TRBJ1-4	3.08406e-06
CASRTDANTGQLYF	TRBV2	TRBJ2-2	3.08406e-06
CASRTQKAPLF	TRBV2	TRBJ1-5	3.08406e-06
CASSAGTNNQAPLF	TRBV2	TRBJ1-5	3.08406e-06
CASSARTNNERLFF	TRBV2	TRBJ1-4	3.08406e-06
CASSATGPNERLFF	TRBV2	TRBJ1-4	3.08406e-06
CASSATNSGNTLYF	TRBV2	TRBJ1-3	3.08406e-06
CASSEDRGYEQYF	TRBV2	TRBJ2-7	3.08406e-06
CASSEDSGAETLYF	TRBV2	TRBJ2-3	3.08406e-06
CASSEGNYAEQFF	TRBV2	TRBJ2-1	3.08406e-06
CASSENSPANSDYTF	TRBV2	TRBJ1-2	3.08406e-06
CASSFGTGGDSDYTF	TRBV2	TRBJ1-2	3.08406e-06
CASSFRDRETLYF	TRBV2	TRBJ2-3	3.08406e-06
CASSFSDWGVQDTQYF	TRBV2	TRBJ2-5	3.08406e-06
CASSGDNNERLFF	TRBV2	TRBJ1-4	3.08406e-06
CASSGDNNYAEQFF	TRBV2	TRBJ2-1	3.08406e-06
CASSGDSYEQYF	TRBV2	TRBJ2-7	3.08406e-06
CASSGGNQDTQYF	TRBV2	TRBJ2-5	3.08406e-06
CASSGNSDYTF	TRBV2	TRBJ1-2	3.08406e-06
CASSGTGEAEQFF	TRBV2	TRBJ2-1	3.08406e-06
CASSHANTGQLYF	TRBV2	TRBJ2-2	3.08406e-06
CASSHARTISNERLFF	TRBV2	TRBJ1-4	3.08406e-06
CASSHDRGRAEQFF	TRBV2	TRBJ2-1	3.08406e-06
CASSHDSAETLYF	TRBV2	TRBJ2-3	3.08406e-06
CASSHDSSGNTLYF	TRBV2	TRBJ1-3	3.08406e-06
CASSHDSSQNTLYF	TRBV2	TRBJ2-4	3.08406e-06
CASSHDWGNYAEQFF	TRBV2	TRBJ2-1	3.08406e-06
CASSHDWGQDTQYF	TRBV2	TRBJ2-5	3.08406e-06
CASSHEGNYAEQFF	TRBV2	TRBJ2-1	3.08406e-06
CASSHGAGGAQDTLYF	TRBV2	TRBJ2-4	3.08406e-06
CASSHGGATNSDYTF	TRBV2	TRBJ1-2	3.08406e-06
CASSHGGHNYAEQFF	TRBV2	TRBJ2-1	3.08406e-06
CASSHGGTINSDYTF	TRBV2	TRBJ1-2	3.08406e-06
CASSHGLGDSAETLYF	TRBV2	TRBJ2-3	3.08406e-06
CASSHGLGEYEQYF	TRBV2	TRBJ2-7	3.08406e-06
CASSHGQINERLFF	TRBV2	TRBJ1-4	3.08406e-06
CASSHGQSAETLYF	TRBV2	TRBJ2-3	3.08406e-06
CASSHGRANTEVFF	TRBV2	TRBJ1-1	3.08406e-06
CASSHGTANSDYTF	TRBV2	TRBJ1-2	3.08406e-06
CASSHGTGAQDTQYF	TRBV2	TRBJ2-5	3.08406e-06
CASSHGTGGAQDTLYF	TRBV2	TRBJ2-4	3.08406e-06
CASSHGTGGVTGQLYF	TRBV2	TRBJ2-2	3.08406e-06
CASSHLEVFF	TRBV2	TRBJ1-1	3.08406e-06
CASSHLRGNQDTQYF	TRBV2	TRBJ2-5	3.08406e-06
CASSHPDKANTGQLYF	TRBV2	TRBJ2-2	3.08406e-06
CASSHPDSSQNTLYF	TRBV2	TRBJ2-4	3.08406e-06
CASSHPDTQYF	TRBV2	TRBJ2-5	3.08406e-06
CASSHPDWASAETLYF	TRBV2	TRBJ2-3	3.08406e-06
CASSHPGGNYAEQFF	TRBV2	TRBJ2-1	3.08406e-06
CASSHPGGRAEQFF	TRBV2	TRBJ2-1	3.08406e-06
CASSHPGLGISYEQYF	TRBV2	TRBJ2-7	3.08406e-06
CASSHPGQGENTLYF	TRBV2	TRBJ2-4	3.08406e-06
CASSHPGQGGAEQFF	TRBV2	TRBJ2-1	3.08406e-06
CASSHPGQGYAEQFF	TRBV2	TRBJ2-1	3.08406e-06
CASSHPGQISNERLFF	TRBV2	TRBJ1-4	3.08406e-06
CASSHPGQPYEQYF	TRBV2	TRBJ2-7	3.08406e-06
CASSHPGQSNTEVFF	TRBV2	TRBJ1-1	3.08406e-06
CASSHPGTGGGERLFF	TRBV2	TRBJ1-4	3.08406e-06
CASSHPGTGGNTEVFF	TRBV2	TRBJ1-1	3.08406e-06
CASSHPIRGPSGNTLYF	TRBV2	TRBJ1-3	3.08406e-06
CASSHPLGTNNQAPLF	TRBV2	TRBJ1-5	3.08406e-06
CASSHPQGAAEQFF	TRBV2	TRBJ2-1	3.08406e-06
CASSHPTGYEQYF	TRBV2	TRBJ2-7	3.08406e-06
CASSHPYSGNTLYF	TRBV2	TRBJ1-3	3.08406e-06
CASSHQGAETLYF	TRBV2	TRBJ2-3	3.08406e-06
CASSHQGRNSDYTF	TRBV2	TRBJ1-2	3.08406e-06
CASSHQNQAPLF	TRBV2	TRBJ1-5	3.08406e-06
CASSHRDISYEQYF	TRBV2	TRBJ2-7	3.08406e-06
CASSHRDNQDTQYF	TRBV2	TRBJ2-5	3.08406e-06
CASSHRDNYEQYF	TRBV2	TRBJ2-7	3.08406e-06
CASSHRDRASAEQFF	TRBV2	TRBJ2-1	3.08406e-06
CASSHRDRGNQAPLF	TRBV2	TRBJ1-5	3.08406e-06
CASSHRDWGYEQYF	TRBV2	TRBJ2-7	3.08406e-06
CASSHRDWVDTQYF	TRBV2	TRBJ2-5	3.08406e-06
CASSHRTVYAEQFF	TRBV2	TRBJ2-1	3.08406e-06
CASSHTGDYAEQFF	TRBV2	TRBJ2-1	3.08406e-06
CASSHWGSSYEQYF	TRBV2	TRBJ2-7	3.08406e-06
CASSHWVSAETLYF	TRBV2	TRBJ2-3	3.08406e-06
CASSKDSSAEALYF	TRBV2	TRBJ2-3	3.08406e-06
CASSKDSSAVTLYF	TRBV2	TRBJ2-3	3.08406e-06
CASSKGGSQNTLYF	TRBV2	TRBJ2-4	3.08406e-06
CASSKLGAQNTLYF	TRBV2	TRBJ2-4	3.08406e-06
CASSKQGGEQYF	TRBV2	TRBJ2-7	3.08406e-06
CASSLDGSAETLYF	TRBV2	TRBJ2-3	3.08406e-06
CASSLDSSNERLFF	TRBV2	TRBJ1-4	3.08406e-06
CASSLDTNQDTQYF	TRBV2	TRBJ2-5	3.08406e-06
CASSLGHLNTGQLYF	TRBV2	TRBJ2-2	3.08406e-06
CASSLGNTGQLYF	TRBV2	TRBJ2-2	3.08406e-06
CASSLGQGGNTLYF	TRBV2	TRBJ1-3	3.08406e-06
CASSLGQGQNTLYF	TRBV2	TRBJ2-4	3.08406e-06
CASSLGTGGEETLYF	TRBV2	TRBJ2-3	3.08406e-06
CASSLGTINQAPLF	TRBV2	TRBJ1-5	3.08406e-06
CASSLGTPNSDYTF	TRBV2	TRBJ1-2	3.08406e-06
CASSLHWGGSSYEQYF	TRBV2	TRBJ2-7	3.08406e-06
CASSLKNTEVFF	TRBV2	TRBJ1-1	3.08406e-06
CASSLLGASAETLYF	TRBV2	TRBJ2-3	3.08406e-06
CASSLLGGSSYEQYF	TRBV2	TRBJ2-7	3.08406e-06
CASSLLYTNKEVFF	TRBV2	TRBJ1-1	3.08406e-06
CASSLLYTNTAVFF	TRBV2	TRBJ1-1	3.08406e-06
CASSLLYTNTEGFF	TRBV2	TRBJ1-1	3.08406e-06
CASSLLYTNTEIFF	TRBV2	TRBJ1-1	3.08406e-06
CASSLLYTNTEVIF	TRBV2	TRBJ1-1	3.08406e-06
CASSLLYTNTEVSF	TRBV2	TRBJ1-1	3.08406e-06
CASSLLYTNTKVFF	TRBV2	TRBJ1-1	3.08406e-06
CASSLPGLDEQYF	TRBV2	TRBJ2-7	3.08406e-06
CASSLPGQGAFEQYF	TRBV2	TRBJ2-7	3.08406e-06
CASSLPGTGASQNTLYF	TRBV2	TRBJ2-4	3.08406e-06
CASSLPQGNSDYTF	TRBV2	TRBJ1-2	3.08406e-06
CASSLPTGEDTLYF	TRBV2	TRBJ2-4	3.08406e-06
CASSLPYTNTEVFF	TRBV2	TRBJ1-1	3.08406e-06
CASSLRDKTYEQYF	TRBV2	TRBJ2-7	3.08406e-06
CASSLRGANSDYTF	TRBV2	TRBJ1-2	3.08406e-06
CASSLRVDTGQLYF	TRBV2	TRBJ2-2	3.08406e-06
CASSLRYTNTEVFF	TRBV2	TRBJ1-1	3.08406e-06
CASSLSSAETLYF	TRBV2	TRBJ2-3	3.08406e-06
CASSLTDYEQYF	TRBV2	TRBJ2-7	3.08406e-06
CASSLTGAGANTEVFF	TRBV2	TRBJ1-1	3.08406e-06
CASSLTGGAREQYF	TRBV2	TRBJ2-7	3.08406e-06
CASSLTGQNTEVFF	TRBV2	TRBJ1-1	3.08406e-06
CASSLTNNQDTQYF	TRBV2	TRBJ2-5	3.08406e-06
CASSLTNTEVFF	TRBV2	TRBJ1-1	3.08406e-06
CASSMGGWAEQFF	TRBV2	TRBJ2-1	3.08406e-06
CASSNRGWNQAPLF	TRBV2	TRBJ1-5	3.08406e-06
CASSPAGRQNPLYF	TRBV2	TRBJ2-4	3.08406e-06
CASSPAGTANERLFF	TRBV2	TRBJ1-4	3.08406e-06
CASSPDNNQAPLF	TRBV2	TRBJ1-5	3.08406e-06
CASSPDPSAETLYF	TRBV2	TRBJ2-3	3.08406e-06
CASSPDRADTQYF	TRBV2	TRBJ2-5	3.08406e-06
CASSPDRDGNTLYF	TRBV2	TRBJ1-3	3.08406e-06
CASSPDRGDTQYF	TRBV2	TRBJ2-5	3.08406e-06
CASSPDRVAEQFF	TRBV2	TRBJ2-1	3.08406e-06
CASSPDRVGNTLYF	TRBV2	TRBJ1-3	3.08406e-06
CASSPDSRAETLYF	TRBV2	TRBJ2-3	3.08406e-06
CASSPDSSADTLYF	TRBV2	TRBJ2-3	3.08406e-06
CASSPDSSAETLHF	TRBV2	TRBJ2-3	3.08406e-06
CASSPDSSAETLNF	TRBV2	TRBJ2-3	3.08406e-06
CASSPDSSSETLYF	TRBV2	TRBJ2-3	3.08406e-06
CASSPDSSTETLYF	TRBV2	TRBJ2-3	3.08406e-06
CASSPDTYEQYF	TRBV2	TRBJ2-7	3.08406e-06
CASSPDWGGSQDTQYF	TRBV2	TRBJ2-5	3.08406e-06
CASSPDWGISYEQYF	TRBV2	TRBJ2-7	3.08406e-06
CASSPDWVANTGQLYF	TRBV2	TRBJ2-2	3.08406e-06
CASSPEDEQYF	TRBV2	TRBJ2-7	3.08406e-06
CASSPGAGGYEQYF	TRBV2	TRBJ2-7	3.08406e-06
CASSPGASAETLYF	TRBV2	TRBJ2-3	3.08406e-06
CASSPGDGNTLYF	TRBV2	TRBJ1-3	3.08406e-06
CASSPGEDSPLYF	TRBV2	TRBJ1-6	3.08406e-06
CASSPGENSPLYF	TRBV2	TRBJ1-6	3.08406e-06
CASSPGGAETLYF	TRBV2	TRBJ2-3	3.08406e-06
CASSPGGANFDYTF	TRBV2	TRBJ1-2	3.08406e-06
CASSPGGENTLYF	TRBV2	TRBJ2-4	3.08406e-06
CASSPGGLEQYF	TRBV2	TRBJ2-7	3.08406e-06
CASSPGGQGTQYF	TRBV2	TRBJ2-5	3.08406e-06
CASSPGGRAETLYF	TRBV2	TRBJ2-3	3.08406e-06
CASSPGGVGAETLYF	TRBV2	TRBJ2-3	3.08406e-06
CASSPGHGDTLYF	TRBV2	TRBJ1-3	3.08406e-06
CASSPGHLANSDYTF	TRBV2	TRBJ1-2	3.08406e-06
CASSPGHNSGNTLYF	TRBV2	TRBJ1-3	3.08406e-06
CASSPGLGANQDTQYF	TRBV2	TRBJ2-5	3.08406e-06
CASSPGLGWYAEQFF	TRBV2	TRBJ2-1	3.08406e-06
CASSPGNSDYTF	TRBV2	TRBJ1-2	3.08406e-06
CASSPGQANSDYTF	TRBV2	TRBJ1-2	3.08406e-06
CASSPGQANTEVFF	TRBV2	TRBJ1-1	3.08406e-06
CASSPGQDYAEQFF	TRBV2	TRBJ2-1	3.08406e-06
CASSPGQFYAEQFF	TRBV2	TRBJ2-1	3.08406e-06
CASSPGQGAATQYF	TRBV2	TRBJ2-5	3.08406e-06
CASSPGQGANSDYTF	TRBV2	TRBJ1-2	3.08406e-06
CASSPGQGAYAEQFF	TRBV2	TRBJ2-1	3.08406e-06
CASSPGQGAYEQYF	TRBV2	TRBJ2-7	3.08406e-06
CASSPGQGDVFF	TRBV2	TRBJ1-1	3.08406e-06
CASSPGQGNSDYTF	TRBV2	TRBJ1-2	3.08406e-06
CASSPGQGTGAEQFF	TRBV2	TRBJ2-1	3.08406e-06
CASSPGQNNQAPLF	TRBV2	TRBJ1-5	3.08406e-06
CASSPGQNTEVFF	TRBV2	TRBJ1-1	3.08406e-06
CASSPGQQNTLYF	TRBV2	TRBJ2-4	3.08406e-06
CASSPGQSQAPLF	TRBV2	TRBJ1-5	3.08406e-06
CASSPGQSSAETLYF	TRBV2	TRBJ2-3	3.08406e-06
CASSPGQVNQAPLF	TRBV2	TRBJ1-5	3.08406e-06
CASSPGQYNERLFF	TRBV2	TRBJ1-4	3.08406e-06
CASSPGTANSDYTF	TRBV2	TRBJ1-2	3.08406e-06
CASSPGTENSLYF	TRBV2	TRBJ2-4	3.08406e-06
CASSPGTFSGNTLYF	TRBV2	TRBJ1-3	3.08406e-06
CASSPGTGANERLFF	TRBV2	TRBJ1-4	3.08406e-06
CASSPGTGGASAETLYF	TRBV2	TRBJ2-3	3.08406e-06
CASSPGTGHAEQFF	TRBV2	TRBJ2-1	3.08406e-06
CASSPGTGNERLFF	TRBV2	TRBJ1-4	3.08406e-06
CASSPGTGVYEQYF	TRBV2	TRBJ2-7	3.08406e-06
CASSPGTISNERLFF	TRBV2	TRBJ1-4	3.08406e-06
CASSPGTPYEQYF	TRBV2	TRBJ2-7	3.08406e-06
CASSPGTSNTGQLYF	TRBV2	TRBJ2-2	3.08406e-06
CASSPGTTNERLFF	TRBV2	TRBJ1-4	3.08406e-06
CASSPGTTNTEVFF	TRBV2	TRBJ1-1	3.08406e-06
CASSPGTVYEQYF	TRBV2	TRBJ2-7	3.08406e-06
CASSPGWGGAENTLYF	TRBV2	TRBJ2-4	3.08406e-06
CASSPGWGGSQNTLYF	TRBV2	TRBJ2-4	3.08406e-06
CASSPHDWGGAETLYF	TRBV2	TRBJ2-3	3.08406e-06
CASSPHRDKNTGQLYF	TRBV2	TRBJ2-2	3.08406e-06
CASSPIGGAGAEQFF	TRBV2	TRBJ2-1	3.08406e-06
CASSPILGSAETLYF	TRBV2	TRBJ2-3	3.08406e-06
CASSPINERLFF	TRBV2	TRBJ1-4	3.08406e-06
CASSPIQSNTGQLYF	TRBV2	TRBJ2-2	3.08406e-06
CASSPIRQNQDTQYF	TRBV2	TRBJ2-5	3.08406e-06
CASSPKSSYEQYF	TRBV2	TRBJ2-7	3.08406e-06
CASSPLDTGQLYF	TRBV2	TRBJ2-2	3.08406e-06
CASSPLGDGYAEQFF	TRBV2	TRBJ2-1	3.08406e-06
CASSPLGGLAEQFF	TRBV2	TRBJ2-1	3.08406e-06
CASSPLGGQDTQYF	TRBV2	TRBJ2-5	3.08406e-06
CASSPLGGSSAETLYF	TRBV2	TRBJ2-3	3.08406e-06
CASSPLGTANTGQLYF	TRBV2	TRBJ2-2	3.08406e-06
CASSPLHWGSQNTLYF	TRBV2	TRBJ2-4	3.08406e-06
CASSPLLGASAETLYF	TRBV2	TRBJ2-3	3.08406e-06
CASSPLLGGFQDTQYF	TRBV2	TRBJ2-5	3.08406e-06
CASSPLRDRGYEQYF	TRBV2	TRBJ2-7	3.08406e-06
CASSPLYTNTEVFF	TRBV2	TRBJ1-1	3.08406e-06
CASSPNGGVYEQYF	TRBV2	TRBJ2-7	3.08406e-06
CASSPNNQDTQYF	TRBV2	TRBJ2-5	3.08406e-06
CASSPNNSPLYF	TRBV2	TRBJ1-6	3.08406e-06
CASSPNSDYTF	TRBV2	TRBJ1-2	3.08406e-06
CASSPPASNYAEQFF	TRBV2	TRBJ2-1	3.08406e-06
CASSPPDSRAEQFF	TRBV2	TRBJ2-1	3.08406e-06
CASSPPGADPPLYF	TRBV2	TRBJ2-4	3.08406e-06
CASSPPGDTGQLYF	TRBV2	TRBJ2-2	3.08406e-06
CASSPPGGQNTLYF	TRBV2	TRBJ2-4	3.08406e-06
CASSPPGGSYNSPLYF	TRBV2	TRBJ1-6	3.08406e-06
CASSPPGLGANTGQLYF	TRBV2	TRBJ2-2	3.08406e-06
CASSPPGLGYEQYF	TRBV2	TRBJ2-7	3.08406e-06
CASSPPGLGYTGQLYF	TRBV2	TRBJ2-2	3.08406e-06
CASSPPGQGALEQYF	TRBV2	TRBJ2-7	3.08406e-06
CASSPPGQGDQAPLF	TRBV2	TRBJ1-5	3.08406e-06
CASSPPGQGNTEVLF	TRBV2	TRBJ1-1	3.08406e-06
CASSPPGQGSGNTLYF	TRBV2	TRBJ1-3	3.08406e-06
CASSPPGQINERLFF	TRBV2	TRBJ1-4	3.08406e-06
CASSPPGQIYAEQFF	TRBV2	TRBJ2-1	3.08406e-06
CASSPPGQQDTQYF	TRBV2	TRBJ2-5	3.08406e-06
CASSPPGTTNTEVFF	TRBV2	TRBJ1-1	3.08406e-06
CASSPPNRGETLYF	TRBV2	TRBJ2-3	3.08406e-06
CASSPPPGQNTLYF	TRBV2	TRBJ2-4	3.08406e-06
CASSPPRLGGAETLYF	TRBV2	TRBJ2-3	3.08406e-06
CASSPPTGGEQYF	TRBV2	TRBJ2-7	3.08406e-06
CASSPPTKSSYEQYF	TRBV2	TRBJ2-7	3.08406e-06
CASSPQGANSDYTF	TRBV2	TRBJ1-2	3.08406e-06
CASSPQGAQNTLYF	TRBV2	TRBJ2-4	3.08406e-06
CASSPQGDTEVFF	TRBV2	TRBJ1-1	3.08406e-06
CASSPQGGSAETLYF	TRBV2	TRBJ2-3	3.08406e-06
CASSPQGRKDTQYF	TRBV2	TRBJ2-5	3.08406e-06
CASSPQGSGNTLYF	TRBV2	TRBJ1-3	3.08406e-06
CASSPQGTSGNTLYF	TRBV2	TRBJ1-3	3.08406e-06
CASSPQGYEQYF	TRBV2	TRBJ2-7	3.08406e-06
CASSPRDGYEQYF	TRBV2	TRBJ2-7	3.08406e-06
CASSPRDKTNERLFF	TRBV2	TRBJ1-4	3.08406e-06
CASSPRDNSAETLYF	TRBV2	TRBJ2-3	3.08406e-06
CASSPRDRDAEQFF	TRBV2	TRBJ2-1	3.08406e-06
CASSPRDRNYAEQFF	TRBV2	TRBJ2-1	3.08406e-06
CASSPRDRVNSDYTF	TRBV2	TRBJ1-2	3.08406e-06
CASSPRDSGNTLYF	TRBV2	TRBJ1-3	3.08406e-06
CASSPRDTSGNTLYF	TRBV2	TRBJ1-3	3.08406e-06
CASSPRDWVYAEQFF	TRBV2	TRBJ2-1	3.08406e-06
CASSPRGAQDTQYF	TRBV2	TRBJ2-5	3.08406e-06
CASSPRGAYEQYF	TRBV2	TRBJ2-7	3.08406e-06
CASSPRGGAETLYF	TRBV2	TRBJ2-3	3.08406e-06
CASSPRGPNERLFF	TRBV2	TRBJ1-4	3.08406e-06
CASSPRGQGAGERLFF	TRBV2	TRBJ1-4	3.08406e-06
CASSPRGQGSDYTF	TRBV2	TRBJ1-2	3.08406e-06
CASSPRGVGYAEQFF	TRBV2	TRBJ2-1	3.08406e-06
CASSPRLGGDYEQYF	TRBV2	TRBJ2-7	3.08406e-06
CASSPRLGTLYF	TRBV2	TRBJ2-3	3.08406e-06
CASSPRLGTSAETLYF	TRBV2	TRBJ2-3	3.08406e-06
CASSPRQGETLYF	TRBV2	TRBJ2-3	3.08406e-06
CASSPRQGGYAEQFF	TRBV2	TRBJ2-1	3.08406e-06
CASSPRQTSAETLYF	TRBV2	TRBJ2-3	3.08406e-06
CASSPRTGNTEVFF	TRBV2	TRBJ1-1	3.08406e-06
CASSPRTGRDYAEQFF	TRBV2	TRBJ2-1	3.08406e-06
CASSPRTSSAETLYF	TRBV2	TRBJ2-3	3.08406e-06
CASSPRVPGGAETLYF	TRBV2	TRBJ2-3	3.08406e-06
CASSPRWDYAEQFF	TRBV2	TRBJ2-1	3.08406e-06
CASSPSGDSSYEQYF	TRBV2	TRBJ2-7	3.08406e-06
CASSPSGRGTGQLYF	TRBV2	TRBJ2-2	3.08406e-06
CASSPSYEQYF	TRBV2	TRBJ2-7	3.08406e-06
CASSPTASYEQYF	TRBV2	TRBJ2-7	3.08406e-06
CASSPTDNQDTQYF	TRBV2	TRBJ2-5	3.08406e-06
CASSPTDSNERLFF	TRBV2	TRBJ1-4	3.08406e-06
CASSPTGEGNTEVFF	TRBV2	TRBJ1-1	3.08406e-06
CASSPTGETSAETLYF	TRBV2	TRBJ2-3	3.08406e-06
CASSPTGFLNTGQLYF	TRBV2	TRBJ2-2	3.08406e-06
CASSPTGGAYEQYF	TRBV2	TRBJ2-7	3.08406e-06
CASSPTGGDSPLYF	TRBV2	TRBJ1-6	3.08406e-06
CASSPTGGNYAEQFF	TRBV2	TRBJ2-1	3.08406e-06
CASSPTGGSNYAEQFF	TRBV2	TRBJ2-1	3.08406e-06
CASSPTGGTEVFF	TRBV2	TRBJ1-1	3.08406e-06
CASSPTGKNERLFF	TRBV2	TRBJ1-4	3.08406e-06
CASSPTGRANERLFF	TRBV2	TRBJ1-4	3.08406e-06
CASSPTGRNTLYF	TRBV2	TRBJ1-3	3.08406e-06
CASSPTGSNTGQLYF	TRBV2	TRBJ2-2	3.08406e-06
CASSPTGTAETLYF	TRBV2	TRBJ2-3	3.08406e-06
CASSPTGTNTEVFF	TRBV2	TRBJ1-1	3.08406e-06
CASSPTLNQDTQYF	TRBV2	TRBJ2-5	3.08406e-06
CASSPTTGVRNTLYF	TRBV2	TRBJ2-4	3.08406e-06
CASSPTTNSDYAF	TRBV2	TRBJ1-2	3.08406e-06
CASSPWGSQNTLYF	TRBV2	TRBJ2-4	3.08406e-06
CASSPWGTRAEQFF	TRBV2	TRBJ2-1	3.08406e-06
CASSQAAGARQNTLYF	TRBV2	TRBJ2-4	3.08406e-06
CASSQADNSYEQYF	TRBV2	TRBJ2-7	3.08406e-06
CASSQADRALNQDTQYF	TRBV2	TRBJ2-5	3.08406e-06
CASSQADRGDTQYF	TRBV2	TRBJ2-5	3.08406e-06
CASSQAENTGQLYF	TRBV2	TRBJ2-2	3.08406e-06
CASSQAGANSDYTF	TRBV2	TRBJ1-2	3.08406e-06
CASSQAGANTGQLYF	TRBV2	TRBJ2-2	3.08406e-06
CASSQAGAQNTLYF	TRBV2	TRBJ2-4	3.08406e-06
CASSQAGDSNERLFF	TRBV2	TRBJ1-4	3.08406e-06
CASSQAGENTLYF	TRBV2	TRBJ2-4	3.08406e-06
CASSQAGFGNTLYF	TRBV2	TRBJ1-3	3.08406e-06
CASSQAGGAGAEQFF	TRBV2	TRBJ2-1	3.08406e-06
CASSQAGGAVTGQLYF	TRBV2	TRBJ2-2	3.08406e-06
CASSQAGGAYAEQFF	TRBV2	TRBJ2-1	3.08406e-06
CASSQAGGLEQYF	TRBV2	TRBJ2-7	3.08406e-06
CASSQAGGRAYEQYF	TRBV2	TRBJ2-7	3.08406e-06
CASSQAGGRDAEQFF	TRBV2	TRBJ2-1	3.08406e-06
CASSQAGGSQNTLYF	TRBV2	TRBJ2-4	3.08406e-06
CASSQAGGTNTGQLYF	TRBV2	TRBJ2-2	3.08406e-06
CASSQAGGVYTGQLYF	TRBV2	TRBJ2-2	3.08406e-06
CASSQAGLAETLYF	TRBV2	TRBJ2-3	3.08406e-06
CASSQAGLGGFYEQYF	TRBV2	TRBJ2-7	3.08406e-06
CASSQAGLGGSAEQFF	TRBV2	TRBJ2-1	3.08406e-06
CASSQAGLGGYEQYF	TRBV2	TRBJ2-7	3.08406e-06
CASSQAGLGNTGQLYF	TRBV2	TRBJ2-2	3.08406e-06
CASSQAGNQDTQYF	TRBV2	TRBJ2-5	3.08406e-06
CASSQAGNYAEQFF	TRBV2	TRBJ2-1	3.08406e-06
CASSQAGQANTGQLYF	TRBV2	TRBJ2-2	3.08406e-06
CASSQAGQGYAEQFF	TRBV2	TRBJ2-1	3.08406e-06
CASSQAGQKNTLYF	TRBV2	TRBJ2-4	3.08406e-06
CASSQAGQNQAPLF	TRBV2	TRBJ1-5	3.08406e-06
CASSQAGQQDTLYF	TRBV2	TRBJ2-4	3.08406e-06
CASSQAGQQNTLHF	TRBV2	TRBJ2-4	3.08406e-06
CASSQAGQSYNSPLYF	TRBV2	TRBJ1-6	3.08406e-06
CASSQAGRENTSYF	TRBV2	TRBJ2-4	3.08406e-06
CASSQAGRGAETLYF	TRBV2	TRBJ2-3	3.08406e-06
CASSQAGRQHTSYF	TRBV2	TRBJ2-4	3.08406e-06
CASSQAGRQNSLHF	TRBV2	TRBJ2-4	3.08406e-06
CASSQAGRQNTLYF	TRBV2	TRBJ1-6	3.08406e-06
CASSQAGRQNTQYF	TRBV2	TRBJ2-4	3.08406e-06
CASSQAGRQSTLCF	TRBV2	TRBJ2-4	3.08406e-06
CASSQAGRQYILYF	TRBV2	TRBJ2-4	3.08406e-06
CASSQAGRRNTLCF	TRBV2	TRBJ2-4	3.08406e-06
CASSQAGSGNTLYF	TRBV2	TRBJ1-3	3.08406e-06
CASSQAGTAGNTLYF	TRBV2	TRBJ1-3	3.08406e-06
CASSQAGTDYAEQFF	TRBV2	TRBJ2-1	3.08406e-06
CASSQAGTGGADYTF	TRBV2	TRBJ1-2	3.08406e-06
CASSQAGTGGAPEQFF	TRBV2	TRBJ2-1	3.08406e-06
CASSQAGTGGGAEQFF	TRBV2	TRBJ2-1	3.08406e-06
CASSQAGTGGQDTQYF	TRBV2	TRBJ2-5	3.08406e-06
CASSQAGTGKSDTQYF	TRBV2	TRBJ2-5	3.08406e-06
CASSQAGTGNGVFF	TRBV2	TRBJ1-1	3.08406e-06
CASSQAGTGPYEQYF	TRBV2	TRBJ2-7	3.08406e-06
CASSQAGTGVDTQYF	TRBV2	TRBJ2-5	3.08406e-06
CASSQAGTISNERLFF	TRBV2	TRBJ1-4	3.08406e-06
CASSQAGTSGNTLYF	TRBV2	TRBJ1-3	3.08406e-06
CASSQAGTTNERLFF	TRBV2	TRBJ1-4	3.08406e-06
CASSQAGTYSGNTLYF	TRBV2	TRBJ1-3	3.08406e-06
CASSQAGVSSYEQYF	TRBV2	TRBJ2-7	3.08406e-06
CASSQAGWQKTLYF	TRBV2	TRBJ2-4	3.08406e-06
CASSQAGWQSTLYF	TRBV2	TRBJ2-4	3.08406e-06
CASSQAGWRNTLYF	TRBV2	TRBJ2-4	3.08406e-06
CASSQAGYSPLYF	TRBV2	TRBJ1-6	3.08406e-06
CASSQALGDTQYF	TRBV2	TRBJ2-5	3.08406e-06
CASSQANSQDTQYF	TRBV2	TRBJ2-5	3.08406e-06
CASSQAPDWNTGQLYF	TRBV2	TRBJ2-2	3.08406e-06
CASSQAPRNSDYTF	TRBV2	TRBJ1-2	3.08406e-06
CASSQAQAVNERLFF	TRBV2	TRBJ1-4	3.08406e-06
CASSQAQGNNSPLYF	TRBV2	TRBJ1-6	3.08406e-06
CASSQAQRGSSYEQYF	TRBV2	TRBJ2-7	3.08406e-06
CASSQARSDYTF	TRBV2	TRBJ1-2	3.08406e-06
CASSQARTNSDYTF	TRBV2	TRBJ1-2	3.08406e-06
CASSQASANSDYTF	TRBV2	TRBJ1-2	3.08406e-06
CASSQASGAEMLYF	TRBV2	TRBJ2-3	3.08406e-06
CASSQASNQAPLF	TRBV2	TRBJ1-5	3.08406e-06
CASSQASSNERLFF	TRBV2	TRBJ1-4	3.08406e-06
CASSQASSQNTLYF	TRBV2	TRBJ2-4	3.08406e-06
CASSQATALMAEQFF	TRBV2	TRBJ2-1	3.08406e-06
CASSQATGASGNTLYF	TRBV2	TRBJ1-3	3.08406e-06
CASSQATGDQNTLYF	TRBV2	TRBJ2-4	3.08406e-06
CASSQATGNSDYTF	TRBV2	TRBJ1-2	3.08406e-06
CASSQATGTGTYEQYF	TRBV2	TRBJ2-7	3.08406e-06
CASSQAVDGNTLYF	TRBV2	TRBJ1-3	3.08406e-06
CASSQAVGAFSDYTF	TRBV2	TRBJ1-2	3.08406e-06
CASSQAVRGADTQYF	TRBV2	TRBJ2-5	3.08406e-06
CASSQAWAEQFF	TRBV2	TRBJ2-1	3.08406e-06
CASSQAWVSAETLYF	TRBV2	TRBJ2-3	3.08406e-06
CASSQDADSGNTLYF	TRBV2	TRBJ1-3	3.08406e-06
CASSQDADTQYF	TRBV2	TRBJ2-5	3.08406e-06
CASSQDADWGAEQFF	TRBV2	TRBJ2-1	3.08406e-06
CASSQDAFNYAEQFF	TRBV2	TRBJ2-1	3.08406e-06
CASSQDAGGDTQYF	TRBV2	TRBJ2-5	3.08406e-06
CASSQDAGGGEQYF	TRBV2	TRBJ2-7	3.08406e-06
CASSQDAGGSQNTLYF	TRBV2	TRBJ2-4	3.08406e-06
CASSQDAGHTGQLYF	TRBV2	TRBJ2-2	3.08406e-06
CASSQDAGNYAEQFF	TRBV2	TRBJ2-1	3.08406e-06
CASSQDAGSSDYTF	TRBV2	TRBJ1-2	3.08406e-06
CASSQDAGVSDYTF	TRBV2	TRBJ1-2	3.08406e-06
CASSQDANSDYTF	TRBV2	TRBJ1-2	3.08406e-06
CASSQDAQGAETLYF	TRBV2	TRBJ2-3	3.08406e-06
CASSQDAQLQDTQYF	TRBV2	TRBJ2-5	3.08406e-06
CASSQDARENTEVFF	TRBV2	TRBJ1-1	3.08406e-06
CASSQDARGRGDSPLYF	TRBV2	TRBJ1-6	3.08406e-06
CASSQDASNTEVFF	TRBV2	TRBJ1-1	3.08406e-06
CASSQDATSQNTLYF	TRBV2	TRBJ2-4	3.08406e-06
CASSQDAVKDTQYF	TRBV2	TRBJ2-5	3.08406e-06
CASSQDCSAATLYF	TRBV2	TRBJ2-3	3.08406e-06
CASSQDDGAYSGNTLYF	TRBV2	TRBJ1-3	3.08406e-06
CASSQDDGGPYEQYF	TRBV2	TRBJ2-7	3.08406e-06
CASSQDDGTQDTQYF	TRBV2	TRBJ2-5	3.08406e-06
CASSQDDNYEQYF	TRBV2	TRBJ2-7	3.08406e-06
CASSQDDRDEQYF	TRBV2	TRBJ2-7	3.08406e-06
CASSQDDRFEQYF	TRBV2	TRBJ2-7	3.08406e-06
CASSQDDRQYF	TRBV2	TRBJ2-7	3.08406e-06
CASSQDDRYEQYF	TRBV2	TRBJ2-7	3.08406e-06
CASSQDDSAETLYF	TRBV2	TRBJ2-3	3.08406e-06
CASSQDDSGNTLYF	TRBV2	TRBJ1-3	3.08406e-06
CASSQDDWGAYEQYF	TRBV2	TRBJ2-7	3.08406e-06
CASSQDDWGPYEQYF	TRBV2	TRBJ2-7	3.08406e-06
CASSQDDWGSETLYF	TRBV2	TRBJ2-3	3.08406e-06
CASSQDDWKNTLNF	TRBV2	TRBJ2-4	3.08406e-06
CASSQDDWKTTLYF	TRBV2	TRBJ2-4	3.08406e-06
CASSQDEAGGAEQYF	TRBV2	TRBJ2-7	3.08406e-06
CASSQDEANTLYF	TRBV2	TRBJ2-4	3.08406e-06
CASSQDEGAGSQNTLYF	TRBV2	TRBJ2-4	3.08406e-06
CASSQDEGAYNSPLYF	TRBV2	TRBJ1-6	3.08406e-06
CASSQDEGGSYEQYF	TRBV2	TRBJ2-7	3.08406e-06
CASSQDEGQNTLYF	TRBV2	TRBJ2-4	3.08406e-06
CASSQDELGGAETLYF	TRBV2	TRBJ2-3	3.08406e-06
CASSQDELGGLEQYF	TRBV2	TRBJ2-7	3.08406e-06
CASSQDFAEQFF	TRBV2	TRBJ2-1	3.08406e-06
CASSQDFDTQYF	TRBV2	TRBJ2-5	3.08406e-06
CASSQDFEETLYF	TRBV2	TRBJ2-3	3.08406e-06
CASSQDFGQNTEVFF	TRBV2	TRBJ1-1	3.08406e-06
CASSQDFISQNTLYF	TRBV2	TRBJ2-4	3.08406e-06
CASSQDFKQFF	TRBV2	TRBJ2-1	3.08406e-06
CASSQDFSAEMLYF	TRBV2	TRBJ2-3	3.08406e-06
CASSQDFSAGTLYF	TRBV2	TRBJ2-3	3.08406e-06
CASSQDFWGGASDTLYF	TRBV2	TRBJ2-4	3.08406e-06
CASSQDFWGRGQNTLYF	TRBV2	TRBJ2-4	3.08406e-06
CASSQDGADSDYTF	TRBV2	TRBJ1-2	3.08406e-06
CASSQDGAGNYEQYF	TRBV2	TRBJ2-7	3.08406e-06
CASSQDGANTEVFF	TRBV2	TRBJ1-1	3.08406e-06
CASSQDGDKKDTQYF	TRBV2	TRBJ2-5	3.08406e-06
CASSQDGDNTGQLYF	TRBV2	TRBJ2-2	3.08406e-06
CASSQDGDQDTQYF	TRBV2	TRBJ2-5	3.08406e-06
CASSQDGDRKDTQYF	TRBV2	TRBJ2-5	3.08406e-06
CASSQDGDWGAQDTQYF	TRBV2	TRBJ2-5	3.08406e-06
CASSQDGDWGGYAEQFF	TRBV2	TRBJ2-1	3.08406e-06
CASSQDGEQYF	TRBV2	TRBJ2-7	3.08406e-06
CASSQDGESTLYF	TRBV2	TRBJ2-4	3.08406e-06
CASSQDGGAEQFF	TRBV2	TRBJ2-1	3.08406e-06
CASSQDGGAGAETLYF	TRBV2	TRBJ2-3	3.08406e-06
CASSQDGGALKTLYF	TRBV2	TRBJ2-3	3.08406e-06
CASSQDGGASYEQYF	TRBV2	TRBJ2-7	3.08406e-06
CASSQDGGDSYEQYF	TRBV2	TRBJ2-7	3.08406e-06
CASSQDGGEAYEQYF	TRBV2	TRBJ2-7	3.08406e-06
CASSQDGGEQYF	TRBV2	TRBJ2-7	3.08406e-06
CASSQDGGGADEQYF	TRBV2	TRBJ2-7	3.08406e-06
CASSQDGGGAETLYF	TRBV2	TRBJ2-3	3.08406e-06
CASSQDGGGGEQYF	TRBV2	TRBJ2-7	3.08406e-06
CASSQDGGGNQAPLF	TRBV2	TRBJ1-5	3.08406e-06
CASSQDGGGSSYEQYF	TRBV2	TRBJ2-7	3.08406e-06
CASSQDGGLYSDYTF	TRBV2	TRBJ1-2	3.08406e-06
CASSQDGGNSDYTF	TRBV2	TRBJ1-2	3.08406e-06
CASSQDGGNTGQLYF	TRBV2	TRBJ2-2	3.08406e-06
CASSQDGGQNTLYF	TRBV2	TRBJ2-4	3.08406e-06
CASSQDGGQSNERFFF	TRBV2	TRBJ1-4	3.08406e-06
CASSQDGGQSSYEQYF	TRBV2	TRBJ2-7	3.08406e-06
CASSQDGGRGQNTLYF	TRBV2	TRBJ2-4	3.08406e-06
CASSQDGGRINTLYF	TRBV2	TRBJ2-4	3.08406e-06
CASSQDGGRMEQYF	TRBV2	TRBJ2-7	3.08406e-06
CASSQDGGRYAEQFF	TRBV2	TRBJ2-1	3.08406e-06
CASSQDGGSDYTF	TRBV2	TRBJ1-2	3.08406e-06
CASSQDGGSGNTLYF	TRBV2	TRBJ1-3	3.08406e-06
CASSQDGGSSYEQYF	TRBV2	TRBJ2-7	3.08406e-06
CASSQDGGSTGQLYF	TRBV2	TRBJ2-2	3.08406e-06
CASSQDGGTMAYEQYF	TRBV2	TRBJ2-7	3.08406e-06
CASSQDGGTSQDTQYF	TRBV2	TRBJ2-5	3.08406e-06
CASSQDGGVQNTLYF	TRBV2	TRBJ2-4	3.08406e-06
CASSQDGGVYAEQFF	TRBV2	TRBJ2-1	3.08406e-06
CASSQDGGWRQNTLYF	TRBV2	TRBJ2-4	3.08406e-06
CASSQDGGYEQCF	TRBV2	TRBJ2-7	3.08406e-06
CASSQDGKNNQAPLF	TRBV2	TRBJ1-5	3.08406e-06
CASSQDGLGGSTLYF	TRBV2	TRBJ2-4	3.08406e-06
CASSQDGNQAPLF	TRBV2	TRBJ1-5	3.08406e-06
CASSQDGNYAEQFF	TRBV2	TRBJ2-1	3.08406e-06
CASSQDGNYNSPLYF	TRBV2	TRBJ1-6	3.08406e-06
CASSQDGQDTQYF	TRBV2	TRBJ2-5	3.08406e-06
CASSQDGQGDSDYTF	TRBV2	TRBJ1-2	3.08406e-06
CASSQDGQGYNSPLYF	TRBV2	TRBJ1-6	3.08406e-06
CASSQDGQKNTLYF	TRBV2	TRBJ2-4	3.08406e-06
CASSQDGQNNQAPLF	TRBV2	TRBJ1-5	3.08406e-06
CASSQDGQNSDYTF	TRBV2	TRBJ1-2	3.08406e-06
CASSQDGQNTGQLYF	TRBV2	TRBJ2-2	3.08406e-06
CASSQDGQSAETLYF	TRBV2	TRBJ2-3	3.08406e-06
CASSQDGQSNTEVFF	TRBV2	TRBJ1-1	3.08406e-06
CASSQDGQTNTGQLYF	TRBV2	TRBJ2-2	3.08406e-06
CASSQDGRNQDTQYF	TRBV2	TRBJ2-5	3.08406e-06
CASSQDGTADTEVFF	TRBV2	TRBJ1-1	3.08406e-06
CASSQDGTGAFEQYF	TRBV2	TRBJ2-7	3.08406e-06
CASSQDGTGDLEQYF	TRBV2	TRBJ2-7	3.08406e-06
CASSQDGTGGLEQYF	TRBV2	TRBJ2-7	3.08406e-06
CASSQDGTGGRYEQYF	TRBV2	TRBJ2-7	3.08406e-06
CASSQDGTGGYEQYF	TRBV2	TRBJ2-7	3.08406e-06
CASSQDGTGGYERYF	TRBV2	TRBJ2-7	3.08406e-06
CASSQDGTGVYEQYF	TRBV2	TRBJ2-7	3.08406e-06
CASSQDGTNAEQFF	TRBV2	TRBJ2-1	3.08406e-06
CASSQDGTNNQAPLF	TRBV2	TRBJ1-5	3.08406e-06
CASSQDGTTEVFF	TRBV2	TRBJ1-1	3.08406e-06
CASSQDGVSGNTLYF	TRBV2	TRBJ1-3	3.08406e-06
CASSQDGWASGNTLYF	TRBV2	TRBJ1-3	3.08406e-06
CASSQDGWGGYEQYF	TRBV2	TRBJ2-7	3.08406e-06
CASSQDGWGQDTQYF	TRBV2	TRBJ2-5	3.08406e-06
CASSQDHASSYEQYF	TRBV2	TRBJ2-7	3.08406e-06
CASSQDHFSNERLFF	TRBV2	TRBJ1-4	3.08406e-06
CASSQDHGAYEQYF	TRBV2	TRBJ2-7	3.08406e-06
CASSQDHGSSYEQYF	TRBV2	TRBJ2-7	3.08406e-06
CASSQDHNQNTLYF	TRBV2	TRBJ2-4	3.08406e-06
CASSQDHNTGQLYF	TRBV2	TRBJ2-2	3.08406e-06
CASSQDHSTGQLYF	TRBV2	TRBJ2-2	3.08406e-06
CASSQDHTKDTQYF	TRBV2	TRBJ2-5	3.08406e-06
CASSQDHYAEQFF	TRBV2	TRBJ2-1	3.08406e-06
CASSQDHYEQYF	TRBV2	TRBJ2-7	3.08406e-06
CASSQDIANTEVFF	TRBV2	TRBJ1-1	3.08406e-06
CASSQDIGDTQYF	TRBV2	TRBJ2-5	3.08406e-06
CASSQDINQDAQYF	TRBV2	TRBJ2-5	3.08406e-06
CASSQDINQDTRYF	TRBV2	TRBJ2-5	3.08406e-06
CASSQDIQSQNTLYF	TRBV2	TRBJ2-4	3.08406e-06
CASSQDISTETLYF	TRBV2	TRBJ2-3	3.08406e-06
CASSQDISYNSPLYF	TRBV2	TRBJ1-6	3.08406e-06
CASSQDIWGSQNTLYF	TRBV2	TRBJ2-4	3.08406e-06
CASSQDKGFTEVFF	TRBV2	TRBJ1-1	3.08406e-06
CASSQDKGGQNTLYF	TRBV2	TRBJ2-4	3.08406e-06
CASSQDKNTGQLYF	TRBV2	TRBJ2-2	3.08406e-06
CASSQDKPYEQYF	TRBV2	TRBJ2-7	3.08406e-06
CASSQDKTGGYEQYF	TRBV2	TRBJ2-7	3.08406e-06
CASSQDLAGGDYEQYF	TRBV2	TRBJ2-7	3.08406e-06
CASSQDLAKTGQLYF	TRBV2	TRBJ2-2	3.08406e-06
CASSQDLAQDTQYF	TRBV2	TRBJ2-5	3.08406e-06
CASSQDLDGDTEVFF	TRBV2	TRBJ1-1	3.08406e-06
CASSQDLDQDTQYF	TRBV2	TRBJ2-5	3.08406e-06
CASSQDLDRGREQYF	TRBV2	TRBJ2-7	3.08406e-06
CASSQDLDSAETLYF	TRBV2	TRBJ2-3	3.08406e-06
CASSQDLDTLYF	TRBV2	TRBJ2-4	3.08406e-06
CASSQDLGAEQFF	TRBV2	TRBJ2-1	3.08406e-06
CASSQDLGAGTLYF	TRBV2	TRBJ2-4	3.08406e-06
CASSQDLGASQNTLYF	TRBV2	TRBJ2-4	3.08406e-06
CASSQDLGAYEQYF	TRBV2	TRBJ2-7	3.08406e-06
CASSQDLGDWGEDTQYF	TRBV2	TRBJ2-5	3.08406e-06
CASSQDLGEDTQYF	TRBV2	TRBJ2-5	3.08406e-06
CASSQDLGGEQYF	TRBV2	TRBJ2-7	3.08406e-06
CASSQDLGGGAEQFF	TRBV2	TRBJ2-1	3.08406e-06
CASSQDLGGGEQYF	TRBV2	TRBJ2-7	3.08406e-06
CASSQDLGGIAEQFF	TRBV2	TRBJ2-1	3.08406e-06
CASSQDLGGIGQYF	TRBV2	TRBJ2-7	3.08406e-06
CASSQDLGGRDQNTLYF	TRBV2	TRBJ2-4	3.08406e-06
CASSQDLGGREQYF	TRBV2	TRBJ2-7	3.08406e-06
CASSQDLGGRGNTLYF	TRBV2	TRBJ2-4	3.08406e-06
CASSQDLGGSSQNTLYF	TRBV2	TRBJ2-4	3.08406e-06
CASSQDLGGTEQFF	TRBV2	TRBJ2-1	3.08406e-06
CASSQDLGGTSAETLYF	TRBV2	TRBJ2-3	3.08406e-06
CASSQDLGPYEQYF	TRBV2	TRBJ2-7	3.08406e-06
CASSQDLGQYNSPLYF	TRBV2	TRBJ1-6	3.08406e-06
CASSQDLGREQYF	TRBV2	TRBJ2-7	3.08406e-06
CASSQDLGTGLAYEQYF	TRBV2	TRBJ2-7	3.08406e-06
CASSQDLGVEQYF	TRBV2	TRBJ2-7	3.08406e-06
CASSQDLGVYEQYF	TRBV2	TRBJ2-7	3.08406e-06
CASSQDLGYEQYF	TRBV2	TRBJ2-7	3.08406e-06
CASSQDLLGGKDEQYF	TRBV2	TRBJ2-7	3.08406e-06
CASSQDLLGVEQYF	TRBV2	TRBJ2-7	3.08406e-06
CASSQDLLSNERLFF	TRBV2	TRBJ1-4	3.08406e-06
CASSQDLNTLYF	TRBV2	TRBJ2-4	3.08406e-06
CASSQDLPGGRVFF	TRBV2	TRBJ1-1	3.08406e-06
CASSQDLQGNTEVFF	TRBV2	TRBJ1-1	3.08406e-06
CASSQDLQGSSDYTF	TRBV2	TRBJ1-2	3.08406e-06
CASSQDLQNTEVFF	TRBV2	TRBJ1-1	3.08406e-06
CASSQDLRNQAPLF	TRBV2	TRBJ1-5	3.08406e-06
CASSQDLSSGNTLYF	TRBV2	TRBJ1-3	3.08406e-06
CASSQDLTAEQYF	TRBV2	TRBJ2-7	3.08406e-06
CASSQDLVSQNTLYF	TRBV2	TRBJ2-4	3.08406e-06
CASSQDLWGQDTQYF	TRBV2	TRBJ2-5	3.08406e-06
CASSQDLYNSPLYF	TRBV2	TRBJ1-6	3.08406e-06
CASSQDLYWTQDTQYF	TRBV2	TRBJ2-5	3.08406e-06
CASSQDMAQGGSYEQYF	TRBV2	TRBJ2-7	3.08406e-06
CASSQDMGGNTEVFF	TRBV2	TRBJ1-1	3.08406e-06
CASSQDMGTSAETLYF	TRBV2	TRBJ2-3	3.08406e-06
CASSQDMNTEVFF	TRBV2	TRBJ1-1	3.08406e-06
CASSQDNLYEQYF	TRBV2	TRBJ2-7	3.08406e-06
CASSQDNNQAPLF	TRBV2	TRBJ1-5	3.08406e-06
CASSQDNNSPLYF	TRBV2	TRBJ1-6	3.08406e-06
CASSQDNNYNYAEQFF	TRBV2	TRBJ2-1	3.08406e-06
CASSQDNRANSDYTF	TRBV2	TRBJ1-2	3.08406e-06
CASSQDNRGNTEVFF	TRBV2	TRBJ1-1	3.08406e-06
CASSQDNRVVFF	TRBV2	TRBJ1-1	3.08406e-06
CASSQDNSAETLCF	TRBV2	TRBJ2-3	3.08406e-06
CASSQDNSAETLHF	TRBV2	TRBJ2-3	3.08406e-06
CASSQDNSYNSPLYF	TRBV2	TRBJ1-6	3.08406e-06
CASSQDNTEVFF	TRBV2	TRBJ1-1	3.08406e-06
CASSQDNTNTGVFF	TRBV2	TRBJ1-1	3.08406e-06
CASSQDNTQYF	TRBV2	TRBJ2-5	3.08406e-06
CASSQDNWGGYEQYF	TRBV2	TRBJ2-7	3.08406e-06
CASSQDNWGQDTQYF	TRBV2	TRBJ2-5	3.08406e-06
CASSQDNYAEQFF	TRBV2	TRBJ2-1	3.08406e-06
CASSQDPAGEVFF	TRBV2	TRBJ1-1	3.08406e-06
CASSQDPANSDYTF	TRBV2	TRBJ1-2	3.08406e-06
CASSQDPANTGQLYF	TRBV2	TRBJ2-2	3.08406e-06
CASSQDPATYEQYF	TRBV2	TRBJ2-7	3.08406e-06
CASSQDPDRGLAPLF	TRBV2	TRBJ1-5	3.08406e-06
CASSQDPGAANERLFF	TRBV2	TRBJ1-4	3.08406e-06
CASSQDPGAEMLYF	TRBV2	TRBJ2-3	3.08406e-06
CASSQDPGAGNQAPLF	TRBV2	TRBJ1-5	3.08406e-06
CASSQDPGDSDYTF	TRBV2	TRBJ1-2	3.08406e-06
CASSQDPGETQYF	TRBV2	TRBJ2-5	3.08406e-06
CASSQDPGFQDTQYF	TRBV2	TRBJ2-5	3.08406e-06
CASSQDPGGALAETLYF	TRBV2	TRBJ2-3	3.08406e-06
CASSQDPGGAREQYF	TRBV2	TRBJ2-7	3.08406e-06
CASSQDPGGETLYF	TRBV2	TRBJ2-3	3.08406e-06
CASSQDPGGGAEQFF	TRBV2	TRBJ2-1	3.08406e-06
CASSQDPGGPSQNTLYF	TRBV2	TRBJ2-4	3.08406e-06
CASSQDPGGPYEQYF	TRBV2	TRBJ2-7	3.08406e-06
CASSQDPGGQGAEQFF	TRBV2	TRBJ2-1	3.08406e-06
CASSQDPGGSAETLYF	TRBV2	TRBJ2-3	3.08406e-06
CASSQDPGGTDTQYF	TRBV2	TRBJ2-5	3.08406e-06
CASSQDPGGYNYEQYF	TRBV2	TRBJ2-7	3.08406e-06
CASSQDPGKGDTQYF	TRBV2	TRBJ2-5	3.08406e-06
CASSQDPGLSYEQYF	TRBV2	TRBJ2-7	3.08406e-06
CASSQDPGNQDTQYF	TRBV2	TRBJ2-5	3.08406e-06
CASSQDPGNTGQLYF	TRBV2	TRBJ2-2	3.08406e-06
CASSQDPGNTLYF	TRBV2	TRBJ1-3	3.08406e-06
CASSQDPGNYAEQFF	TRBV2	TRBJ2-1	3.08406e-06
CASSQDPGPFQDTQYF	TRBV2	TRBJ2-5	3.08406e-06
CASSQDPGQNTGQLYF	TRBV2	TRBJ2-2	3.08406e-06
CASSQDPGSAETLYF	TRBV2	TRBJ2-3	3.08406e-06
CASSQDPGTVSGNTLYF	TRBV2	TRBJ1-3	3.08406e-06
CASSQDPGTYEQYF	TRBV2	TRBJ2-7	3.08406e-06
CASSQDPGVPEQYF	TRBV2	TRBJ2-7	3.08406e-06
CASSQDPGVSAETLYF	TRBV2	TRBJ2-3	3.08406e-06
CASSQDPGYEQYF	TRBV2	TRBJ2-7	3.08406e-06
CASSQDPGYSQNTLYF	TRBV2	TRBJ2-4	3.08406e-06
CASSQDPIEQYF	TRBV2	TRBJ2-7	3.08406e-06
CASSQDPKGSGNTLYF	TRBV2	TRBJ1-3	3.08406e-06
CASSQDPNSGNTLYF	TRBV2	TRBJ1-3	3.08406e-06
CASSQDPPGSAETLYF	TRBV2	TRBJ2-3	3.08406e-06
CASSQDPPNSPLYF	TRBV2	TRBJ1-6	3.08406e-06
CASSQDPQFSNERLFF	TRBV2	TRBJ1-4	3.08406e-06
CASSQDPQGAETLYF	TRBV2	TRBJ2-3	3.08406e-06
CASSQDPQNERLFF	TRBV2	TRBJ1-4	3.08406e-06
CASSQDPQQDTQYF	TRBV2	TRBJ2-5	3.08406e-06
CASSQDPRDWGEEQYF	TRBV2	TRBJ2-7	3.08406e-06
CASSQDPRGERLFF	TRBV2	TRBJ1-4	3.08406e-06
CASSQDPRGGSPLYF	TRBV2	TRBJ1-6	3.08406e-06
CASSQDPRGRERLFF	TRBV2	TRBJ1-4	3.08406e-06
CASSQDPSAEILYF	TRBV2	TRBJ2-3	3.08406e-06
CASSQDPSAETPYF	TRBV2	TRBJ2-3	3.08406e-06
CASSQDPSAGTLYF	TRBV2	TRBJ2-3	3.08406e-06
CASSQDPSGNTLYF	TRBV2	TRBJ1-3	3.08406e-06
CASSQDPSNQDTQYF	TRBV2	TRBJ2-5	3.08406e-06
CASSQDPTGGFEQYF	TRBV2	TRBJ2-7	3.08406e-06
CASSQDPTGGNTGQLYF	TRBV2	TRBJ2-2	3.08406e-06
CASSQDPTGLSQNTLYF	TRBV2	TRBJ2-4	3.08406e-06
CASSQDPTGYSAEPLYF	TRBV2	TRBJ2-3	3.08406e-06
CASSQDPVQNTLYF	TRBV2	TRBJ2-4	3.08406e-06
CASSQDPWGGGEQYF	TRBV2	TRBJ2-7	3.08406e-06
CASSQDPWGKDTQYF	TRBV2	TRBJ2-5	3.08406e-06
CASSQDPWNQDTQYF	TRBV2	TRBJ2-5	3.08406e-06
CASSQDPWVNYAEQFF	TRBV2	TRBJ2-1	3.08406e-06
CASSQDQAGGQDTQYF	TRBV2	TRBJ2-5	3.08406e-06
CASSQDQGANTGQLYF	TRBV2	TRBJ2-2	3.08406e-06
CASSQDQGARAEQFF	TRBV2	TRBJ2-1	3.08406e-06
CASSQDQGATEVFF	TRBV2	TRBJ1-1	3.08406e-06
CASSQDQGAYEQYF	TRBV2	TRBJ2-7	3.08406e-06
CASSQDQGDEQYF	TRBV2	TRBJ2-7	3.08406e-06
CASSQDQGGSDYTF	TRBV2	TRBJ1-2	3.08406e-06
CASSQDQGNNQAPLF	TRBV2	TRBJ1-5	3.08406e-06
CASSQDQGQGTERLFF	TRBV2	TRBJ1-4	3.08406e-06
CASSQDQGQNTLYF	TRBV2	TRBJ2-4	3.08406e-06
CASSQDQGQTYEQYF	TRBV2	TRBJ2-7	3.08406e-06
CASSQDQGSDTQYF	TRBV2	TRBJ2-5	3.08406e-06
CASSQDQGTNQAPLF	TRBV2	TRBJ1-5	3.08406e-06
CASSQDQHTDVFF	TRBV2	TRBJ1-1	3.08406e-06
CASSQDQISNERLFF	TRBV2	TRBJ1-4	3.08406e-06
CASSQDQKNTLYF	TRBV2	TRBJ2-4	3.08406e-06
CASSQDQLGGYEQYF	TRBV2	TRBJ2-7	3.08406e-06
CASSQDQRANERLFF	TRBV2	TRBJ1-4	3.08406e-06
CASSQDQTGDTLYF	TRBV2	TRBJ2-4	3.08406e-06
CASSQDQTGSNERLFF	TRBV2	TRBJ1-4	3.08406e-06
CASSQDQTSAETLYF	TRBV2	TRBJ2-3	3.08406e-06
CASSQDRAGTLYF	TRBV2	TRBJ2-3	3.08406e-06
CASSQDRANSDYTF	TRBV2	TRBJ1-2	3.08406e-06
CASSQDRAPLYF	TRBV2	TRBJ1-3	3.08406e-06
CASSQDRAPLYF	TRBV2	TRBJ2-4	3.08406e-06
CASSQDRARDTLYF	TRBV2	TRBJ2-4	3.08406e-06
CASSQDRATNTGQLYF	TRBV2	TRBJ2-2	3.08406e-06
CASSQDRDIYEQYF	TRBV2	TRBJ2-7	3.08406e-06
CASSQDRDKYQAPLF	TRBV2	TRBJ1-5	3.08406e-06
CASSQDRDKYSSYDQYF	TRBV2	TRBJ2-7	3.08406e-06
CASSQDRDRGRQNTLYF	TRBV2	TRBJ2-4	3.08406e-06
CASSQDRDRGYAEQFF	TRBV2	TRBJ2-1	3.08406e-06
CASSQDRDRVGEQYF	TRBV2	TRBJ2-7	3.08406e-06
CASSQDRDTEVFF	TRBV2	TRBJ1-1	3.08406e-06
CASSQDRDWGDAEQFF	TRBV2	TRBJ2-1	3.08406e-06
CASSQDRDYNSPLYF	TRBV2	TRBJ1-6	3.08406e-06
CASSQDRENTLYF	TRBV2	TRBJ2-4	3.08406e-06
CASSQDREYTQYF	TRBV2	TRBJ2-5	3.08406e-06
CASSQDRGADTGQLYF	TRBV2	TRBJ2-2	3.08406e-06
CASSQDRGAGAETLYF	TRBV2	TRBJ2-3	3.08406e-06
CASSQDRGAGETLYF	TRBV2	TRBJ2-3	3.08406e-06
CASSQDRGDTLYF	TRBV2	TRBJ1-3	3.08406e-06
CASSQDRGGAETLYF	TRBV2	TRBJ2-3	3.08406e-06
CASSQDRGGANTLYF	TRBV2	TRBJ2-4	3.08406e-06
CASSQDRGGAYEQYF	TRBV2	TRBJ2-7	3.08406e-06
CASSQDRGGDNQNTLYF	TRBV2	TRBJ2-4	3.08406e-06
CASSQDRGGTNTEVFF	TRBV2	TRBJ1-1	3.08406e-06
CASSQDRGGVFF	TRBV2	TRBJ1-1	3.08406e-06
CASSQDRGLYEQYF	TRBV2	TRBJ2-7	3.08406e-06
CASSQDRGNTEVFF	TRBV2	TRBJ1-1	3.08406e-06
CASSQDRGNYEQYF	TRBV2	TRBJ2-7	3.08406e-06
CASSQDRGPEVFF	TRBV2	TRBJ1-1	3.08406e-06
CASSQDRGPNERLFF	TRBV2	TRBJ1-4	3.08406e-06
CASSQDRGRGAEQFF	TRBV2	TRBJ2-1	3.08406e-06
CASSQDRGRNTLYF	TRBV2	TRBJ2-4	3.08406e-06
CASSQDRGSEQFF	TRBV2	TRBJ2-1	3.08406e-06
CASSQDRGSSAETLYF	TRBV2	TRBJ2-3	3.08406e-06
CASSQDRGSYEQYF	TRBV2	TRBJ2-7	3.08406e-06
CASSQDRGTEVFF	TRBV2	TRBJ1-1	3.08406e-06
CASSQDRGVAETLYF	TRBV2	TRBJ2-3	3.08406e-06
CASSQDRGVQNTLYF	TRBV2	TRBJ2-4	3.08406e-06
CASSQDRGWLGYEQYF	TRBV2	TRBJ2-7	3.08406e-06
CASSQDRGYAEQFF	TRBV2	TRBJ2-1	3.08406e-06
CASSQDRHANTEVFF	TRBV2	TRBJ1-1	3.08406e-06
CASSQDRLGEELYF	TRBV2	TRBJ2-3	3.08406e-06
CASSQDRNQAPLF	TRBV2	TRBJ1-5	3.08406e-06
CASSQDRNYAEQFF	TRBV2	TRBJ2-1	3.08406e-06
CASSQDRPDTQYF	TRBV2	TRBJ2-5	3.08406e-06
CASSQDRQANTEVFF	TRBV2	TRBJ1-1	3.08406e-06
CASSQDRQAPLF	TRBV2	TRBJ1-5	3.08406e-06
CASSQDRQFSYEQYF	TRBV2	TRBJ2-7	3.08406e-06
CASSQDRQNNERLFF	TRBV2	TRBJ1-4	3.08406e-06
CASSQDRQNTLYF	TRBV2	TRBJ2-4	3.08406e-06
CASSQDRRAGQFF	TRBV2	TRBJ2-1	3.08406e-06
CASSQDRRSNTGQLYF	TRBV2	TRBJ2-2	3.08406e-06
CASSQDRRSQNTLYF	TRBV2	TRBJ2-4	3.08406e-06
CASSQDRSEVFF	TRBV2	TRBJ1-1	3.08406e-06
CASSQDRSGGQDTQYF	TRBV2	TRBJ2-5	3.08406e-06
CASSQDRSGNTLYF	TRBV2	TRBJ1-3	3.08406e-06
CASSQDRSNTGQLYF	TRBV2	TRBJ2-2	3.08406e-06
CASSQDRSTYEQYF	TRBV2	TRBJ2-7	3.08406e-06
CASSQDRTGENTLYF	TRBV2	TRBJ2-4	3.08406e-06
CASSQDRTGYAEQFF	TRBV2	TRBJ2-1	3.08406e-06
CASSQDRTQDTQYF	TRBV2	TRBJ2-5	3.08406e-06
CASSQDRTTNTGQLYF	TRBV2	TRBJ2-2	3.08406e-06
CASSQDRVEQFF	TRBV2	TRBJ2-1	3.08406e-06
CASSQDRWANTEVFF	TRBV2	TRBJ1-1	3.08406e-06
CASSQDRWGREQYF	TRBV2	TRBJ2-7	3.08406e-06
CASSQDRWNSGNTLYF	TRBV2	TRBJ1-3	3.08406e-06
CASSQDRYEQYF	TRBV2	TRBJ2-7	3.08406e-06
CASSQDSAETLCF	TRBV2	TRBJ2-3	3.08406e-06
CASSQDSAGGRETLYF	TRBV2	TRBJ2-3	3.08406e-06
CASSQDSANTEVFF	TRBV2	TRBJ1-1	3.08406e-06
CASSQDSAPGQLYF	TRBV2	TRBJ2-2	3.08406e-06
CASSQDSDYTF	TRBV2	TRBJ1-2	3.08406e-06
CASSQDSEDTQYF	TRBV2	TRBJ2-5	3.08406e-06
CASSQDSFNERLFF	TRBV2	TRBJ1-4	3.08406e-06
CASSQDSGAAPLYF	TRBV2	TRBJ2-3	3.08406e-06
CASSQDSGAEMPYF	TRBV2	TRBJ2-3	3.08406e-06
CASSQDSGAQNTLYF	TRBV2	TRBJ2-4	3.08406e-06
CASSQDSGGNERLLF	TRBV2	TRBJ1-4	3.08406e-06
CASSQDSGGNTLYF	TRBV2	TRBJ2-4	3.08406e-06
CASSQDSGGSGNTLYF	TRBV2	TRBJ1-3	3.08406e-06
CASSQDSGQEVFF	TRBV2	TRBJ1-1	3.08406e-06
CASSQDSGQGYAEQFF	TRBV2	TRBJ2-1	3.08406e-06
CASSQDSGQNTLYF	TRBV2	TRBJ2-4	3.08406e-06
CASSQDSGRAERLFF	TRBV2	TRBJ1-4	3.08406e-06
CASSQDSGTETLYF	TRBV2	TRBJ2-3	3.08406e-06
CASSQDSGYSPLYF	TRBV2	TRBJ1-6	3.08406e-06
CASSQDSLEQYF	TRBV2	TRBJ2-7	3.08406e-06
CASSQDSLQNTLYF	TRBV2	TRBJ2-4	3.08406e-06
CASSQDSNAETLNF	TRBV2	TRBJ2-3	3.08406e-06
CASSQDSNSETLYF	TRBV2	TRBJ2-3	3.08406e-06
CASSQDSNSGNTLYF	TRBV2	TRBJ1-3	3.08406e-06
CASSQDSNSPLYF	TRBV2	TRBJ1-6	3.08406e-06
CASSQDSPLYF	TRBV2	TRBJ1-6	3.08406e-06
CASSQDSPNERLFF	TRBV2	TRBJ1-4	3.08406e-06
CASSQDSQAETLYF	TRBV2	TRBJ2-3	3.08406e-06
CASSQDSQDTQYF	TRBV2	TRBJ2-5	3.08406e-06
CASSQDSQGEVFF	TRBV2	TRBJ1-1	3.08406e-06
CASSQDSQGGGNTLYF	TRBV2	TRBJ1-3	3.08406e-06
CASSQDSQGGGTEVFF	TRBV2	TRBJ1-1	3.08406e-06
CASSQDSQLDYTF	TRBV2	TRBJ1-2	3.08406e-06
CASSQDSRETLYF	TRBV2	TRBJ2-3	3.08406e-06
CASSQDSRPVTNSDYTF	TRBV2	TRBJ1-2	3.08406e-06
CASSQDSRVETLYF	TRBV2	TRBJ2-3	3.08406e-06
CASSQDSSAAMLYF	TRBV2	TRBJ2-3	3.08406e-06
CASSQDSSADTLYF	TRBV2	TRBJ2-4	3.08406e-06
CASSQDSSAEAPYF	TRBV2	TRBJ2-3	3.08406e-06
CASSQDSSAEMLHF	TRBV2	TRBJ2-3	3.08406e-06
CASSQDSSAEMPYF	TRBV2	TRBJ2-3	3.08406e-06
CASSQDSSAETPHF	TRBV2	TRBJ2-3	3.08406e-06
CASSQDSSAKTLCF	TRBV2	TRBJ2-3	3.08406e-06
CASSQDSSGGTLYF	TRBV2	TRBJ2-3	3.08406e-06
CASSQDSSNERLIF	TRBV2	TRBJ1-4	3.08406e-06
CASSQDSSNERLSF	TRBV2	TRBJ1-4	3.08406e-06
CASSQDSSNESLFF	TRBV2	TRBJ1-4	3.08406e-06
CASSQDSSQNTLYF	TRBV2	TRBJ2-4	3.08406e-06
CASSQDSSSKTLYF	TRBV2	TRBJ2-3	3.08406e-06
CASSQDSSTEMLYF	TRBV2	TRBJ2-3	3.08406e-06
CASSQDSSTEVFF	TRBV2	TRBJ1-1	3.08406e-06
CASSQDSSYEQYF	TRBV2	TRBJ2-7	3.08406e-06
CASSQDSTEVFF	TRBV2	TRBJ1-1	3.08406e-06
CASSQDSTGAYEQYF	TRBV2	TRBJ2-7	3.08406e-06
CASSQDSVLGGIGYF	TRBV2	TRBJ2-7	3.08406e-06
CASSQDSWGEDTQYF	TRBV2	TRBJ2-5	3.08406e-06
CASSQDSWGGRAETLYF	TRBV2	TRBJ2-3	3.08406e-06
CASSQDSWVSYEQYF	TRBV2	TRBJ2-7	3.08406e-06
CASSQDSYQDTQYF	TRBV2	TRBJ2-5	3.08406e-06
CASSQDTEQYF	TRBV2	TRBJ2-7	3.08406e-06
CASSQDTGAFAEQFF	TRBV2	TRBJ2-1	3.08406e-06
CASSQDTGGAEQFF	TRBV2	TRBJ2-1	3.08406e-06
CASSQDTGGAETLYF	TRBV2	TRBJ2-3	3.08406e-06
CASSQDTGGFGNTLYF	TRBV2	TRBJ1-3	3.08406e-06
CASSQDTGGGQAPLF	TRBV2	TRBJ1-5	3.08406e-06
CASSQDTGGRDTQYF	TRBV2	TRBJ2-5	3.08406e-06
CASSQDTGGVDTQYF	TRBV2	TRBJ2-5	3.08406e-06
CASSQDTGQGGNTEVFF	TRBV2	TRBJ1-1	3.08406e-06
CASSQDTGTGQLYF	TRBV2	TRBJ2-2	3.08406e-06
CASSQDTNQDTQYF	TRBV2	TRBJ2-5	3.08406e-06
CASSQDTQGGWQNTLYF	TRBV2	TRBJ2-4	3.08406e-06
CASSQDTQNYAEQFF	TRBV2	TRBJ2-1	3.08406e-06
CASSQDTSNSDYTF	TRBV2	TRBJ1-2	3.08406e-06
CASSQDTSQNTLYF	TRBV2	TRBJ2-4	3.08406e-06
CASSQDTSSYEQYF	TRBV2	TRBJ2-7	3.08406e-06
CASSQDTYEQYF	TRBV2	TRBJ2-7	3.08406e-06
CASSQDTYSGNTLYF	TRBV2	TRBJ1-3	3.08406e-06
CASSQDVGDSYEQYF	TRBV2	TRBJ2-7	3.08406e-06
CASSQDVGSQNTLYF	TRBV2	TRBJ2-4	3.08406e-06
CASSQDVHPNSDYTF	TRBV2	TRBJ1-2	3.08406e-06
CASSQDVNQAPLF	TRBV2	TRBJ1-5	3.08406e-06
CASSQDVSAETLYF	TRBV2	TRBJ2-3	3.08406e-06
CASSQDWAETLYF	TRBV2	TRBJ2-3	3.08406e-06
CASSQDWANERLFF	TRBV2	TRBJ1-4	3.08406e-06
CASSQDWASAETLYF	TRBV2	TRBJ2-3	3.08406e-06
CASSQDWDRGFGNTLYF	TRBV2	TRBJ1-3	3.08406e-06
CASSQDWDRGGERLFF	TRBV2	TRBJ1-4	3.08406e-06
CASSQDWDRGGNTLYF	TRBV2	TRBJ1-3	3.08406e-06
CASSQDWDRGQNTLYF	TRBV2	TRBJ2-4	3.08406e-06
CASSQDWDRQDTQYF	TRBV2	TRBJ2-5	3.08406e-06
CASSQDWDSAETLYF	TRBV2	TRBJ2-3	3.08406e-06
CASSQDWDSGNTLYF	TRBV2	TRBJ1-3	3.08406e-06
CASSQDWDSQNTLYF	TRBV2	TRBJ2-4	3.08406e-06
CASSQDWDSSYEQYF	TRBV2	TRBJ2-7	3.08406e-06
CASSQDWDTGQLYF	TRBV2	TRBJ2-2	3.08406e-06
CASSQDWDWGYEQYF	TRBV2	TRBJ2-7	3.08406e-06
CASSQDWFNYAEQFF	TRBV2	TRBJ2-1	3.08406e-06
CASSQDWGASQNTLYF	TRBV2	TRBJ2-4	3.08406e-06
CASSQDWGAYEQYF	TRBV2	TRBJ2-7	3.08406e-06
CASSQDWGDNTLYF	TRBV2	TRBJ2-4	3.08406e-06
CASSQDWGGAGAEPLYF	TRBV2	TRBJ2-3	3.08406e-06
CASSQDWGGGEQYF	TRBV2	TRBJ2-7	3.08406e-06
CASSQDWGGGSYEQYF	TRBV2	TRBJ2-7	3.08406e-06
CASSQDWGGNAEQFF	TRBV2	TRBJ2-1	3.08406e-06
CASSQDWGGREQYF	TRBV2	TRBJ2-7	3.08406e-06
CASSQDWGGSSYEQYF	TRBV2	TRBJ2-7	3.08406e-06
CASSQDWGGSYEQYF	TRBV2	TRBJ2-7	3.08406e-06
CASSQDWGLQDTQHF	TRBV2	TRBJ2-5	3.08406e-06
CASSQDWGLSYEQYF	TRBV2	TRBJ2-7	3.08406e-06
CASSQDWGNHAEQFF	TRBV2	TRBJ2-1	3.08406e-06
CASSQDWGNTGQLYF	TRBV2	TRBJ2-2	3.08406e-06
CASSQDWGPGNTLYF	TRBV2	TRBJ1-3	3.08406e-06
CASSQDWGPSYEQYF	TRBV2	TRBJ2-7	3.08406e-06
CASSQDWGQNTLYF	TRBV2	TRBJ2-4	3.08406e-06
CASSQDWGRAETLYF	TRBV2	TRBJ2-3	3.08406e-06
CASSQDWGRGAETLYF	TRBV2	TRBJ2-3	3.08406e-06
CASSQDWGRQDTQYF	TRBV2	TRBJ2-5	3.08406e-06
CASSQDWGRQNTLYF	TRBV2	TRBJ2-4	3.08406e-06
CASSQDWGSGNTLYF	TRBV2	TRBJ1-3	3.08406e-06
CASSQDWGSYEQYF	TRBV2	TRBJ2-7	3.08406e-06
CASSQDWGVEQYF	TRBV2	TRBJ2-7	3.08406e-06
CASSQDWGVSAETLYF	TRBV2	TRBJ2-3	3.08406e-06
CASSQDWGYAEQFF	TRBV2	TRBJ2-1	3.08406e-06
CASSQDWINQDTQYF	TRBV2	TRBJ2-5	3.08406e-06
CASSQDWNSYEQYF	TRBV2	TRBJ2-7	3.08406e-06
CASSQDWQDTQYF	TRBV2	TRBJ2-5	3.08406e-06
CASSQDWRGLSNERLFF	TRBV2	TRBJ1-4	3.08406e-06
CASSQDWSNYAEQFF	TRBV2	TRBJ2-1	3.08406e-06
CASSQDWTGGAEQFF	TRBV2	TRBJ2-1	3.08406e-06
CASSQDWTGGAETLYF	TRBV2	TRBJ2-3	3.08406e-06
CASSQDWTGHTGQLYF	TRBV2	TRBJ2-2	3.08406e-06
CASSQDWTGVGETLYF	TRBV2	TRBJ2-3	3.08406e-06
CASSQDWVEVFF	TRBV2	TRBJ1-1	3.08406e-06
CASSQDWVGANTGQLYF	TRBV2	TRBJ2-2	3.08406e-06
CASSQDWVNHAEQFF	TRBV2	TRBJ2-1	3.08406e-06
CASSQDWVNYAEQFF	TRBV2	TRBJ2-1	3.08406e-06
CASSQDWVSQNTLYF	TRBV2	TRBJ2-4	3.08406e-06
CASSQDWVSYAEQFF	TRBV2	TRBJ2-1	3.08406e-06
CASSQDWWEKFF	TRBV2	TRBJ2-1	3.08406e-06
CASSQDWYEQYF	TRBV2	TRBJ2-7	3.08406e-06
CASSQDYDRYEQYF	TRBV2	TRBJ2-7	3.08406e-06
CASSQDYEQYF	TRBV2	TRBJ2-7	3.08406e-06
CASSQDYQDTQYF	TRBV2	TRBJ2-5	3.08406e-06
CASSQDYRGGNTLYF	TRBV2	TRBJ1-3	3.08406e-06
CASSQDYRGQDTQYF	TRBV2	TRBJ2-5	3.08406e-06
CASSQDYTAEQFF	TRBV2	TRBJ2-1	3.08406e-06
CASSQDYWGKNTLYF	TRBV2	TRBJ2-4	3.08406e-06
CASSQDYWGRYEQYF	TRBV2	TRBJ2-7	3.08406e-06
CASSQDYYSYYEQYF	TRBV2	TRBJ2-7	3.08406e-06
CASSQEAANTGQLYF	TRBV2	TRBJ2-2	3.08406e-06
CASSQEAANYEQYF	TRBV2	TRBJ2-7	3.08406e-06
CASSQEACNYAEQFF	TRBV2	TRBJ2-1	3.08406e-06
CASSQEADLQDTQYF	TRBV2	TRBJ2-5	3.08406e-06
CASSQEADYAEQFF	TRBV2	TRBJ2-1	3.08406e-06
CASSQEAGGKDTQYF	TRBV2	TRBJ2-5	3.08406e-06
CASSQEAGNSDYTF	TRBV2	TRBJ1-2	3.08406e-06
CASSQEAGNYAEQLF	TRBV2	TRBJ2-1	3.08406e-06
CASSQEAGRDTQYF	TRBV2	TRBJ2-5	3.08406e-06
CASSQEAGRGYF	TRBV2	TRBJ2-7	3.08406e-06
CASSQEAGVNSDYTF	TRBV2	TRBJ1-2	3.08406e-06
CASSQEAGYSGNTLYF	TRBV2	TRBJ1-3	3.08406e-06
CASSQEAISNERLFF	TRBV2	TRBJ1-4	3.08406e-06
CASSQEANSDYTF	TRBV2	TRBJ1-2	3.08406e-06
CASSQEATQYF	TRBV2	TRBJ2-5	3.08406e-06
CASSQEAVYAEQFF	TRBV2	TRBJ2-1	3.08406e-06
CASSQEAWGNYAEQFF	TRBV2	TRBJ2-1	3.08406e-06
CASSQEDANTGQLYF	TRBV2	TRBJ2-2	3.08406e-06
CASSQEDGTGYEQYF	TRBV2	TRBJ2-7	3.08406e-06
CASSQEDIAEQFF	TRBV2	TRBJ2-1	3.08406e-06
CASSQEDRGKVFF	TRBV2	TRBJ1-1	3.08406e-06
CASSQEDRGSAPLF	TRBV2	TRBJ1-5	3.08406e-06
CASSQEDRYEQYF	TRBV2	TRBJ2-7	3.08406e-06
CASSQEDSNSPLYF	TRBV2	TRBJ1-6	3.08406e-06
CASSQEDTGQLYF	TRBV2	TRBJ2-2	3.08406e-06
CASSQEDTQAPLF	TRBV2	TRBJ1-5	3.08406e-06
CASSQEEAGQLYF	TRBV2	TRBJ2-2	3.08406e-06
CASSQEEENTLYF	TRBV2	TRBJ2-4	3.08406e-06
CASSQEEGAEVFF	TRBV2	TRBJ1-1	3.08406e-06
CASSQEEGRPGNTLYF	TRBV2	TRBJ1-3	3.08406e-06
CASSQEEGSEQYF	TRBV2	TRBJ2-7	3.08406e-06
CASSQEEGYEQYF	TRBV2	TRBJ2-7	3.08406e-06
CASSQEETANERLFF	TRBV2	TRBJ1-4	3.08406e-06
CASSQEETLYF	TRBV2	TRBJ2-3	3.08406e-06
CASSQEEWGGDTQYF	TRBV2	TRBJ2-5	3.08406e-06
CASSQEFWGSYEQYF	TRBV2	TRBJ2-7	3.08406e-06
CASSQEGAERLFF	TRBV2	TRBJ1-4	3.08406e-06
CASSQEGAGPSPLYF	TRBV2	TRBJ1-6	3.08406e-06
CASSQEGANTEVFF	TRBV2	TRBJ1-1	3.08406e-06
CASSQEGANTGQLYF	TRBV2	TRBJ2-2	3.08406e-06
CASSQEGATEVFF	TRBV2	TRBJ1-1	3.08406e-06
CASSQEGATNSDYTF	TRBV2	TRBJ1-2	3.08406e-06
CASSQEGDTEVFF	TRBV2	TRBJ1-1	3.08406e-06
CASSQEGDTGQLYF	TRBV2	TRBJ2-2	3.08406e-06
CASSQEGDWGNTGQLYF	TRBV2	TRBJ2-2	3.08406e-06
CASSQEGEQYF	TRBV2	TRBJ2-7	3.08406e-06
CASSQEGERAPLF	TRBV2	TRBJ1-5	3.08406e-06
CASSQEGERLFF	TRBV2	TRBJ1-4	3.08406e-06
CASSQEGFEQYF	TRBV2	TRBJ2-7	3.08406e-06
CASSQEGGAATGQLYF	TRBV2	TRBJ2-2	3.08406e-06
CASSQEGGAETLYF	TRBV2	TRBJ2-3	3.08406e-06
CASSQEGGAGYAEQFF	TRBV2	TRBJ2-1	3.08406e-06
CASSQEGGANSDYTF	TRBV2	TRBJ1-2	3.08406e-06
CASSQEGGDGAETLYF	TRBV2	TRBJ2-3	3.08406e-06
CASSQEGGDTQYF	TRBV2	TRBJ2-5	3.08406e-06
CASSQEGGGGAETLYF	TRBV2	TRBJ2-3	3.08406e-06
CASSQEGGGGNTLYF	TRBV2	TRBJ1-3	3.08406e-06
CASSQEGGGPSAETLYF	TRBV2	TRBJ2-3	3.08406e-06
CASSQEGGGSAETLYF	TRBV2	TRBJ2-3	3.08406e-06
CASSQEGGHSNERLFF	TRBV2	TRBJ1-4	3.08406e-06
CASSQEGGHTGQLYF	TRBV2	TRBJ2-2	3.08406e-06
CASSQEGGKGDTQYF	TRBV2	TRBJ2-5	3.08406e-06
CASSQEGGLAETLYF	TRBV2	TRBJ2-3	3.08406e-06
CASSQEGGLREQYF	TRBV2	TRBJ2-7	3.08406e-06
CASSQEGGNNQAPLF	TRBV2	TRBJ1-5	3.08406e-06
CASSQEGGNSDYTF	TRBV2	TRBJ1-2	3.08406e-06
CASSQEGGNTLYF	TRBV2	TRBJ1-3	3.08406e-06
CASSQEGGQDTQYF	TRBV2	TRBJ2-5	3.08406e-06
CASSQEGGQNERLFF	TRBV2	TRBJ1-4	3.08406e-06
CASSQEGGSTEVFF	TRBV2	TRBJ1-1	3.08406e-06
CASSQEGGSTGQLYF	TRBV2	TRBJ2-2	3.08406e-06
CASSQEGGSYAEQFF	TRBV2	TRBJ2-1	3.08406e-06
CASSQEGGVAEQFF	TRBV2	TRBJ2-1	3.08406e-06
CASSQEGGVDTQYF	TRBV2	TRBJ2-5	3.08406e-06
CASSQEGGVNTLYF	TRBV2	TRBJ2-4	3.08406e-06
CASSQEGGYAETLYF	TRBV2	TRBJ2-3	3.08406e-06
CASSQEGHQDTQYF	TRBV2	TRBJ2-5	3.08406e-06
CASSQEGINQDTQYF	TRBV2	TRBJ2-5	3.08406e-06
CASSQEGLANTGQLYF	TRBV2	TRBJ2-2	3.08406e-06
CASSQEGLARQFF	TRBV2	TRBJ2-1	3.08406e-06
CASSQEGLGAETLYF	TRBV2	TRBJ2-3	3.08406e-06
CASSQEGLGDTQYF	TRBV2	TRBJ2-5	3.08406e-06
CASSQEGLGGLEQYF	TRBV2	TRBJ2-7	3.08406e-06
CASSQEGLLYEQYF	TRBV2	TRBJ2-7	3.08406e-06
[truncated: 958 more rows]

## Sheet: Sox13KO Vb4 Skin
Source Data for Figure 6H.
CDR3	TRBV	TRBJ	PercentOfTotal
CASSQDSSAETLYF	TRBV2	TRBJ2-3	0.485931
CASSPDSSAETLYF	TRBV2	TRBJ2-3	0.289098
CASSPTGQNTEVFF	TRBV2	TRBJ1-1	0.0270009
CASSRDSSAETLYF	TRBV2	TRBJ2-3	0.0229827
CASSQGEYSPLYF	TRBV2	TRBJ1-6	0.0186472
CASSQDSSNERLFF	TRBV2	TRBJ1-4	0.013604
CASSQDINQDTQYF	TRBV2	TRBJ2-5	0.0135944
CASSPGGFSNERLFF	TRBV2	TRBJ1-4	0.00876849
CASSQGDYNSPLYF	TRBV2	TRBJ1-6	0.00809802
CASSQDSGAETLYF	TRBV2	TRBJ2-3	0.00746098
CASSQSSSYEQYF	TRBV2	TRBJ2-7	0.00684178
CASSQEHTEVFF	TRBV2	TRBJ1-1	0.00515804
CASSQRDINQDTQYF	TRBV2	TRBJ2-5	0.00404819
CASSQGGFSNERLFF	TRBV2	TRBJ1-4	0.00381671
CASSPTSSAETLYF	TRBV2	TRBJ2-3	0.00328608
CASSQTGIYAEQFF	TRBV2	TRBJ2-1	0.00247579
CAISQDSSAETLYF	TRBV2	TRBJ2-3	0.00185515
CASSVRGAIEQYF	TRBV2	TRBJ2-7	0.00168517
CASGGGQAPLF	TRBV2	TRBJ1-5	0.0016575
CASSQTGGGNSPLYF	TRBV2	TRBJ1-6	0.00153099
CASSQGSSAETLYF	TRBV2	TRBJ2-3	0.00150926
CASSQERGDAETLYF	TRBV2	TRBJ2-3	0.00144405
CARSQDSSAETLYF	TRBV2	TRBJ2-3	0.00134666
CAGSQDSSAETLYF	TRBV2	TRBJ2-3	0.00124066
CASSQGQQDTQYF	TRBV2	TRBJ2-5	0.00122713
CASSQDSSAEALYF	TRBV2	TRBJ2-3	0.00122487
CASSPYSSAETLYF	TRBV2	TRBJ2-3	0.00121852
CASSQGTGDQNTLYF	TRBV2	TRBJ2-4	0.00113486
CASSQDYGSAETLYF	TRBV2	TRBJ2-3	0.00113363
CASSPDGSAETLYF	TRBV2	TRBJ2-3	0.00110923
CASSQDPGVSYEQYF	TRBV2	TRBJ2-7	0.00108012
CASSQETGGTLYF	TRBV2	TRBJ2-4	0.0010711
CASSQDPGGSYEQYF	TRBV2	TRBJ2-7	0.00103932
CASSQDPGGAYEQYF	TRBV2	TRBJ2-7	0.0010223
CASGQDSSAETLYF	TRBV2	TRBJ2-3	0.00100938
CASSQGTGGTEVFF	TRBV2	TRBJ1-1	0.000996875
CASGPDSSAETLYF	TRBV2	TRBJ2-3	0.000985189
CASSQDSSAETPYF	TRBV2	TRBJ2-3	0.000975347
CASSQDSSAETLHF	TRBV2	TRBJ2-3	0.000895589
CASSQWTGNTEVFF	TRBV2	TRBJ1-1	0.000888207
CASSPGTGRDSDYTF	TRBV2	TRBJ1-2	0.000849661
CASSQDSSAGTLYF	TRBV2	TRBJ2-3	0.000816446
CASSPDSSAETLHF	TRBV2	TRBJ2-3	0.00081419
CASRQDSSAETLYF	TRBV2	TRBJ2-3	0.000785075
CASSQDCSAETLYF	TRBV2	TRBJ2-3	0.000767852
CAGSPDSSAETLYF	TRBV2	TRBJ2-3	0.000746734
CASSQDGSAETLYF	TRBV2	TRBJ2-3	0.000714544
CASSPGSSAETLYF	TRBV2	TRBJ2-3	0.000707572
CASSQEGQGAAETLYF	TRBV2	TRBJ2-3	0.000702857
CASSQEPNTEVFF	TRBV2	TRBJ1-1	0.000683994
CASSQGGTTNSDYTF	TRBV2	TRBJ1-2	0.000682968
CASSQWDYNSPLYF	TRBV2	TRBJ1-6	0.000681533
CASSQPGQGAREQYF	TRBV2	TRBJ2-7	0.000672922
CASSQGGMGNTLYF	TRBV2	TRBJ2-4	0.000660415
CASSRQENTEVFF	TRBV2	TRBJ1-1	0.000652213
CASSPDSSAEALYF	TRBV2	TRBJ2-3	0.000650778
CASSQVRYEQYF	TRBV2	TRBJ2-7	0.000648728
CASSQDPSAETLYF	TRBV2	TRBJ2-3	0.000629454
CARSPDSSAETLYF	TRBV2	TRBJ2-3	0.00060157
CASSPDSSAETPYF	TRBV2	TRBJ2-3	0.000584142
CASSQDSSSETLYF	TRBV2	TRBJ2-3	0.000574505
CASSQDSSAESLYF	TRBV2	TRBJ2-3	0.000561383
CASSQTGNYAEQFF	TRBV2	TRBJ2-1	0.000545801
CASSQDSSAETLCF	TRBV2	TRBJ2-3	0.000534524
CSSSQDSSAETLYF	TRBV2	TRBJ2-3	0.000481625
CASSQESGDQNTLYF	TRBV2	TRBJ2-4	0.000477319
CASSQDTSAETLYF	TRBV2	TRBJ2-3	0.000462557
CASSQSDSYEQYF	TRBV2	TRBJ2-7	0.000461327
CASSPDSGAETLYF	TRBV2	TRBJ2-3	0.000452305
CASSQGGQDTQYF	TRBV2	TRBJ2-5	0.000442053
CASSLRQGSQNTLYF	TRBV2	TRBJ2-4	0.000441643
CASSPWGFSNERLFF	TRBV2	TRBJ1-4	0.000431187
CASSQEGTYAETLYF	TRBV2	TRBJ2-3	0.000417449
CVSSQDSSAETLYF	TRBV2	TRBJ2-3	0.000414169
CASIQGGFSNERLFF	TRBV2	TRBJ1-4	0.000412118
CASSPDSSAGTLYF	TRBV2	TRBJ2-3	0.000403917
CASSQEGTGSAETLYF	TRBV2	TRBJ2-3	0.00038977
CASSPDSSAETLCF	TRBV2	TRBJ2-3	0.000386489
CASSPDNSAETLYF	TRBV2	TRBJ2-3	0.000368036
CASSPWGARAETLYF	TRBV2	TRBJ2-3	0.000366191
CASSPGLGGVAETLYF	TRBV2	TRBJ2-3	0.000365371
CASSQDLGGIEQYF	TRBV2	TRBJ2-7	0.000361065
CASSPDCSAETLYF	TRBV2	TRBJ2-3	0.000353479
CASSQDSSADTLYF	TRBV2	TRBJ2-3	0.000351018
CASGQEHTEVFF	TRBV2	TRBJ1-1	0.000350608
CASSQDSRAETLYF	TRBV2	TRBJ2-3	0.00033359
CASSGNSDYTF	TRBV2	TRBJ1-2	0.000322314
CASSQGGDTGQLYF	TRBV2	TRBJ2-2	0.000312472
CASSQEDRGSAPLF	TRBV2	TRBJ1-5	0.000294634
CASSQDLGGREQYF	TRBV2	TRBJ2-7	0.000291148
CASSPDRSAETLYF	TRBV2	TRBJ2-3	0.000290738
CASSLDSSAETLYF	TRBV2	TRBJ2-3	0.000289713
CASSHDSSAETLYF	TRBV2	TRBJ2-3	0.000289303
CASGGAQAPLF	TRBV2	TRBJ1-5	0.000288893
CASSQDPGGNYEQYF	TRBV2	TRBJ2-7	0.000260598
CASSQDRSAETLYF	TRBV2	TRBJ2-3	0.000254242
CPSSQDSSNERLFF	TRBV2	TRBJ1-4	0.000252807
CASSQDSSTETLYF	TRBV2	TRBJ2-3	0.000247066
CASRPDSSAETLYF	TRBV2	TRBJ2-3	0.000243785
CASTRGGEDTQYF	TRBV2	TRBJ2-5	0.000242965
CASSQDSNAETLYF	TRBV2	TRBJ2-3	0.000241325
CACSQDSSAETLYF	TRBV2	TRBJ2-3	0.000239275
CASSNLGGENTLYF	TRBV2	TRBJ2-4	0.000238865
CASSQDSSEETLYF	TRBV2	TRBJ2-3	0.000236199
CASSQDSSVETLYF	TRBV2	TRBJ2-3	0.000229843
CASSQGEQNTLYF	TRBV2	TRBJ2-4	0.000221437
CASSPDSRAETLYF	TRBV2	TRBJ2-3	0.00020893
CTSSQDSSAETLYF	TRBV2	TRBJ2-3	0.000208725
CASSPDTSAETLYF	TRBV2	TRBJ2-3	0.000207084
CASSPDSSADTLYF	TRBV2	TRBJ2-3	0.000205239
CASSQDSSAEMLYF	TRBV2	TRBJ2-3	0.000203804
CASNQDSSAETLYF	TRBV2	TRBJ2-3	0.000200728
CASSPASSAETLYF	TRBV2	TRBJ2-3	0.000190887
CASSQTTNERLFF	TRBV2	TRBJ1-4	0.000189656
CVSSPDSSAETLYF	TRBV2	TRBJ2-3	0.000188836
CASSQASSAETLYF	TRBV2	TRBJ2-3	0.000188221
CASSQEEGSGEQYF	TRBV2	TRBJ2-7	0.000178175
CASSQDSSAETLSF	TRBV2	TRBJ2-3	0.000173049
CASSPTGQNTEAFF	TRBV2	TRBJ1-1	0.000172024
CASSQDSSAATLYF	TRBV2	TRBJ2-3	0.000171408
CASSQDSSAEPLYF	TRBV2	TRBJ2-3	0.000170178
CANSQDSSAETLYF	TRBV2	TRBJ2-3	0.000161362
CASSPDSSEETLYF	TRBV2	TRBJ2-3	0.00015152
CASSQDSSAEKLYF	TRBV2	TRBJ2-3	0.00015029
CACSPDSSAETLYF	TRBV2	TRBJ2-3	0.000146599
CASSPDSSVETLYF	TRBV2	TRBJ2-3	0.000137373
CASSPDSNAETLYF	TRBV2	TRBJ2-3	0.000134297
CASSEDSSAETLYF	TRBV2	TRBJ2-3	0.000133887
CASSPDSSTETLYF	TRBV2	TRBJ2-3	0.000132042
CASSQESSAETLYF	TRBV2	TRBJ2-3	0.000129376
CASSQVSSAETLYF	TRBV2	TRBJ2-3	0.000127531
CTSSPDSSAETLYF	TRBV2	TRBJ2-3	0.000124661
CASNPDSSAETLYF	TRBV2	TRBJ2-3	0.00012179
CASSPDSSAEMLYF	TRBV2	TRBJ2-3	0.000118715
CASSSDSSAETLYF	TRBV2	TRBJ2-3	0.000118715
CASSQNSSAETLYF	TRBV2	TRBJ2-3	0.000112974
CASSPDSSAETLSF	TRBV2	TRBJ2-3	0.000110718
CASSPDSSAATLYF	TRBV2	TRBJ2-3	0.000106413
CASSPDSSAEPLYF	TRBV2	TRBJ2-3	0.000105593
CANSPDSSAETLYF	TRBV2	TRBJ2-3	0.000103132
CASSQDSSAETQYF	TRBV2	TRBJ2-3	0.000102312
CASSQDSSAVTLYF	TRBV2	TRBJ2-3	9.51358e-05
CSSSQGEYSPLYF	TRBV2	TRBJ1-6	9.34955e-05
CASSPNSSAETLYF	TRBV2	TRBJ2-3	9.30855e-05
CASGGGPAPLF	TRBV2	TRBJ1-5	9.18552e-05
CASSPDSSAEKLYF	TRBV2	TRBJ2-3	9.10351e-05
CASSQDSSAETXYF	TRBV2	TRBJ2-3	8.73445e-05
CASSPTGQNTEVLF	TRBV2	TRBJ1-1	8.48841e-05
CASSQDNSAETLYF	TRBV2	TRBJ2-3	8.16035e-05
CASSQDSSAETMYF	TRBV2	TRBJ2-3	8.09884e-05
CASSQDSCAETLYF	TRBV2	TRBJ2-3	8.05784e-05
CASSQDSIAETLYF	TRBV2	TRBJ2-3	8.03733e-05
CASSKDSSAETLYF	TRBV2	TRBJ2-3	7.95532e-05
CASSQDFSAETLYF	TRBV2	TRBJ2-3	7.93482e-05
CASSQGENSPLYF	TRBV2	TRBJ1-6	7.8323e-05
CASSQDSSAKTLYF	TRBV2	TRBJ2-3	7.77079e-05
CASSPTGQNAEVFF	TRBV2	TRBJ1-1	7.60676e-05
CASRPWGARAETLYF	TRBV2	TRBJ2-3	7.52475e-05
CASSRGSSAETLYF	TRBV2	TRBJ2-3	7.48374e-05
CASSPDSSAETQYF	TRBV2	TRBJ2-3	7.34022e-05
CASSPVSSAETLYF	TRBV2	TRBJ2-3	7.07367e-05
CAGSPTGQNTEVFF	TRBV2	TRBJ1-1	7.05317e-05
CASSQDSSAETLNF	TRBV2	TRBJ2-3	6.90965e-05
CASSADSSAETLYF	TRBV2	TRBJ2-3	6.86864e-05
CASSPDSSAVTLYF	TRBV2	TRBJ2-3	6.86864e-05
CASSPGTGRDSDYPF	TRBV2	TRBJ1-2	6.31505e-05
CASSQDSSGETLYF	TRBV2	TRBJ2-3	6.31505e-05
CDSSQDSSAETLYF	TRBV2	TRBJ2-3	6.31505e-05
CGSSQDSSAETLYF	TRBV2	TRBJ2-3	6.27404e-05
CARSPTGQNTEVFF	TRBV2	TRBJ1-1	6.25354e-05
CASSPESSAETLYF	TRBV2	TRBJ2-3	5.96649e-05
CAGSRDSSAETLYF	TRBV2	TRBJ2-3	5.74095e-05
CASSPDSSSETLYF	TRBV2	TRBJ2-3	5.72045e-05
CASSPTGQSTEVFF	TRBV2	TRBJ1-1	5.61793e-05
CASSPTGQDTEVFF	TRBV2	TRBJ1-1	5.49491e-05
CARSRDSSAETLYF	TRBV2	TRBJ2-3	5.24887e-05
CASSPDSSAETMYF	TRBV2	TRBJ2-3	5.24887e-05
CASSQDSSAQTLYF	TRBV2	TRBJ2-3	5.22837e-05
CASSQDSSAETLDF	TRBV2	TRBJ2-3	5.18736e-05
CASSQDSTAETLYF	TRBV2	TRBJ2-3	4.8388e-05
CASSRDGSAETLYF	TRBV2	TRBJ2-3	4.8183e-05
CASSPTGRNTEVFF	TRBV2	TRBJ1-1	4.77729e-05
CASSQDSSAETLFF	TRBV2	TRBJ2-3	4.77729e-05
CASSQGGTTNSDYPF	TRBV2	TRBJ1-2	4.75679e-05
CASSQDSSAETRYF	TRBV2	TRBJ2-3	4.69528e-05
CASSRDSSAETPYF	TRBV2	TRBJ2-3	4.69528e-05
CASGRDSSAETLYF	TRBV2	TRBJ2-3	4.65427e-05
CASSPDSIAETLYF	TRBV2	TRBJ2-3	4.63377e-05
CASSRDSSAEALYF	TRBV2	TRBJ2-3	4.61327e-05
CASSPAGQNTEVFF	TRBV2	TRBJ1-1	4.59276e-05
CASSQDSSPETLYF	TRBV2	TRBJ2-3	4.59276e-05
CASSPTGQNTAVFF	TRBV2	TRBJ1-1	4.57226e-05
CASGPTGQNTEVFF	TRBV2	TRBJ1-1	4.53125e-05
CARSQGEYSPLYF	TRBV2	TRBJ1-6	4.40823e-05
CASSRDSGAETLYF	TRBV2	TRBJ2-3	4.40823e-05
CASSPDSSAKTLYF	TRBV2	TRBJ2-3	4.30571e-05
CASSPTGQTTEVFF	TRBV2	TRBJ1-1	4.28521e-05
CASSPDSSAETLNF	TRBV2	TRBJ2-3	4.2442e-05
CASSPDSSGETLYF	TRBV2	TRBJ2-3	4.2237e-05
CGSSPDSSAETLYF	TRBV2	TRBJ2-3	4.18269e-05
CASRRDSSAETLYF	TRBV2	TRBJ2-3	4.12118e-05
CASSQGEYSPPYF	TRBV2	TRBJ1-6	4.08018e-05
CASIQDSSAETLYF	TRBV2	TRBJ2-3	4.05967e-05
CASSQDSSAERLYF	TRBV2	TRBJ2-3	4.01867e-05
CASSQDSSTERLFF	TRBV2	TRBJ1-4	3.99816e-05
CASSQGGFSNERLSF	TRBV2	TRBJ1-4	3.97766e-05
CASSRDSSAETLHF	TRBV2	TRBJ2-3	3.97766e-05
CASSPDSSAETLDF	TRBV2	TRBJ2-3	3.93665e-05
CASSQGSSNERLFF	TRBV2	TRBJ1-4	3.93665e-05
CDSSPDSSAETLYF	TRBV2	TRBJ2-3	3.87514e-05
CAGSQGEYSPLYF	TRBV2	TRBJ1-6	3.83414e-05
CASGQGEYSPLYF	TRBV2	TRBJ1-6	3.83414e-05
CASSPTGQNTEVSF	TRBV2	TRBJ1-1	3.81363e-05
CASSSTGQNTEVFF	TRBV2	TRBJ1-1	3.81363e-05
CASSXDSSAETLYF	TRBV2	TRBJ2-3	3.79313e-05
CASSQDINPDTQYF	TRBV2	TRBJ2-5	3.77263e-05
CASSQDINQGTQYF	TRBV2	TRBJ2-5	3.77263e-05
CASSQDISQDTQYF	TRBV2	TRBJ2-5	3.67011e-05
CASSQGEHSPLYF	TRBV2	TRBJ1-6	3.64961e-05
CASSPDSSAETRYF	TRBV2	TRBJ2-3	3.6291e-05
CASSQGGYNSPLYF	TRBV2	TRBJ1-6	3.6291e-05
CAISPDSSAETLYF	TRBV2	TRBJ2-3	3.6086e-05
CASSQDSGAEALYF	TRBV2	TRBJ2-3	3.6086e-05
CASSQYSSAETLYF	TRBV2	TRBJ2-3	3.5881e-05
CSSSPDSSAETLYF	TRBV2	TRBJ2-3	3.5881e-05
CARSQDSSNERLFF	TRBV2	TRBJ1-4	3.50608e-05
CARRQDSSAETLYF	TRBV2	TRBJ2-3	3.48558e-05
CASSPDSCAETLYF	TRBV2	TRBJ2-3	3.48558e-05
CASSQGINQDTQYF	TRBV2	TRBJ2-5	3.46508e-05
CASSTDSSAETLYF	TRBV2	TRBJ2-3	3.46508e-05
CAGSQGGFSNERLFF	TRBV2	TRBJ1-4	3.44457e-05
CASSPDSTAETLYF	TRBV2	TRBJ2-3	3.44457e-05
CASSQDINEDTQYF	TRBV2	TRBJ2-5	3.44457e-05
CASSRGEYSPLYF	TRBV2	TRBJ1-6	3.44457e-05
CASSQDSSDERLFF	TRBV2	TRBJ1-4	3.40357e-05
CASSPTGQNTGVFF	TRBV2	TRBJ1-1	3.38306e-05
CASSQGGYSPLYF	TRBV2	TRBJ1-6	3.38306e-05
CASSQDYSAETLYF	TRBV2	TRBJ2-3	3.34205e-05
CASSPGGFSNEGLFF	TRBV2	TRBJ1-4	3.32155e-05
CASSQDSSNEGLFF	TRBV2	TRBJ1-4	3.32155e-05
CASSPTGQNTEFFF	TRBV2	TRBJ1-1	3.30105e-05
CASSRDCSAETLYF	TRBV2	TRBJ2-3	3.28054e-05
CASSQDINQDTQCF	TRBV2	TRBJ2-5	3.23954e-05
CASSQDISAETLYF	TRBV2	TRBJ2-3	3.21903e-05
CASSPDSSAQTLYF	TRBV2	TRBJ2-3	3.05501e-05
CARSQDINQDTQYF	TRBV2	TRBJ2-5	3.0345e-05
CASSPTGQKTEVFF	TRBV2	TRBJ1-1	3.014e-05
CASCQDSSAETLYF	TRBV2	TRBJ2-3	2.97299e-05
CASSRDSSAGTLYF	TRBV2	TRBJ2-3	2.97299e-05
CPSSQDSSAETLYF	TRBV2	TRBJ2-3	2.95249e-05
CASSPDSSAETLFF	TRBV2	TRBJ2-3	2.93199e-05
CASSQDINQETQYF	TRBV2	TRBJ2-5	2.91148e-05
CASRQGEYSPLYF	TRBV2	TRBJ1-6	2.87048e-05
CASSPTGQNKEVFF	TRBV2	TRBJ1-1	2.87048e-05
CASSRDINQDTQYF	TRBV2	TRBJ2-5	2.87048e-05
CARSPGGFSNERLFF	TRBV2	TRBJ1-4	2.84997e-05
CASSQDSSNERLLF	TRBV2	TRBJ1-4	2.84997e-05
CASSPDISAETLYF	TRBV2	TRBJ2-3	2.80897e-05
CAGSQDINQDTQYF	TRBV2	TRBJ2-5	2.78846e-05
CASSQDSSNGRLFF	TRBV2	TRBJ1-4	2.78846e-05
CASSPDSSPETLYF	TRBV2	TRBJ2-3	2.76796e-05
CASRQDINQDTQYF	TRBV2	TRBJ2-5	2.70645e-05
CASSPDSSNERLFF	TRBV2	TRBJ1-4	2.66544e-05
CASSPTGQNTDVFF	TRBV2	TRBJ1-1	2.66544e-05
CASSQGEYPPLYF	TRBV2	TRBJ1-6	2.66544e-05
CASSRDSSNERLFF	TRBV2	TRBJ1-4	2.66544e-05
CASSPHSSAETLYF	TRBV2	TRBJ2-3	2.62444e-05
CASSQDSPNERLFF	TRBV2	TRBJ1-4	2.62444e-05
CASGQDINQDTQYF	TRBV2	TRBJ2-5	2.60393e-05
CAGSQDSSNERLFF	TRBV2	TRBJ1-4	2.58343e-05
CASSQHSSAETLYF	TRBV2	TRBJ2-3	2.58343e-05
CASSQGAYSPLYF	TRBV2	TRBJ1-6	2.54242e-05
CASSQGEYSPLHF	TRBV2	TRBJ1-6	2.54242e-05
CASSQEKTGGSDYTF	TRBV2	TRBJ1-2	2.50142e-05
CASSQGECSPLYF	TRBV2	TRBJ1-6	2.48091e-05
CARSQDSGAETLYF	TRBV2	TRBJ2-3	2.46041e-05
CASSPGGFSNARLFF	TRBV2	TRBJ1-4	2.46041e-05
CASSPTSSAEALYF	TRBV2	TRBJ2-3	2.46041e-05
CASGGGQGPLF	TRBV2	TRBJ1-5	2.4194e-05
CASSPDINQDTQYF	TRBV2	TRBJ2-5	2.4194e-05
CASSRDRSAETLYF	TRBV2	TRBJ2-3	2.3989e-05
CASSRDSSAETLCF	TRBV2	TRBJ2-3	2.3989e-05
CASSQDGSNERLFF	TRBV2	TRBJ1-4	2.37839e-05
CASSQDINQDAQYF	TRBV2	TRBJ2-5	2.29638e-05
CASSPDSSAERLYF	TRBV2	TRBJ2-3	2.27588e-05
CASSQDSSAETVYF	TRBV2	TRBJ2-3	2.23487e-05
CASGQDSSNERLFF	TRBV2	TRBJ1-4	2.19386e-05
CASSPDSSAESLYF	TRBV2	TRBJ2-3	2.17336e-05
CASSQDINRDTQYF	TRBV2	TRBJ2-5	2.17336e-05
CASSQDVNQDTQYF	TRBV2	TRBJ2-5	2.17336e-05
CASSPHRRGGNTLYF	TRBV2	TRBJ1-3	2.15286e-05
CASSPTGQNTEDFF	TRBV2	TRBJ1-1	2.15286e-05
CASSPTRQNTEVFF	TRBV2	TRBJ1-1	2.09135e-05
CASSQDSSNERLSF	TRBV2	TRBJ1-4	2.09135e-05
CARSQGDYNSPLYF	TRBV2	TRBJ1-6	2.07084e-05
CASTQDSSAETLYF	TRBV2	TRBJ2-3	2.07084e-05
CASSQGAYNSPLYF	TRBV2	TRBJ1-6	2.05034e-05
CASSQGDYNSPPYF	TRBV2	TRBJ1-6	2.05034e-05
CASSQDSSSERLFF	TRBV2	TRBJ1-4	2.02984e-05
CASSQGSGAETLYF	TRBV2	TRBJ2-3	2.02984e-05
CASSPGGLSNERLFF	TRBV2	TRBJ1-4	1.96833e-05
CASSQGEDSPLYF	TRBV2	TRBJ1-6	1.96833e-05
CASGQGDYNSPLYF	TRBV2	TRBJ1-6	1.94782e-05
CATSQDSSAETLYF	TRBV2	TRBJ2-3	1.92732e-05
CASSPGGFSNERLLF	TRBV2	TRBJ1-4	1.86581e-05
CASIPDSSAETLYF	TRBV2	TRBJ2-3	1.84531e-05
CASSHTGQNTEVFF	TRBV2	TRBJ1-1	1.84531e-05
CASSPTGHNTEVFF	TRBV2	TRBJ1-1	1.84531e-05
CASRPTGQNTEVFF	TRBV2	TRBJ1-1	1.8248e-05
CAGSQSSSYEQYF	TRBV2	TRBJ2-7	1.8043e-05
CASSQDASAETLYF	TRBV2	TRBJ2-3	1.8043e-05
CASSQDTNQDTQYF	TRBV2	TRBJ2-5	1.8043e-05
CASGGGQASLF	TRBV2	TRBJ1-5	1.7838e-05
CASSGDSSAETLYF	TRBV2	TRBJ2-3	1.7838e-05
CASSPGGFSDERLFF	TRBV2	TRBJ1-4	1.76329e-05
CASSQSSSYEQHF	TRBV2	TRBJ2-7	1.74279e-05
CASSQDIDQDTQYF	TRBV2	TRBJ2-5	1.72229e-05
CASSRDSSADTLYF	TRBV2	TRBJ2-3	1.72229e-05
CASSPTGQNTKVFF	TRBV2	TRBJ1-1	1.70178e-05
CASSQDINQDTQHF	TRBV2	TRBJ2-5	1.70178e-05
CASSPGGFPNERLFF	TRBV2	TRBJ1-4	1.66078e-05
CASSRDSRAETLYF	TRBV2	TRBJ2-3	1.64027e-05
CPSSPDSSAETLYF	TRBV2	TRBJ2-3	1.61977e-05
CASSQRGINQDTQYF	TRBV2	TRBJ2-5	1.59927e-05
CVSSPTGQNTEVFF	TRBV2	TRBJ1-1	1.59927e-05
CASSPGGSSNERLFF	TRBV2	TRBJ1-4	1.57876e-05
CASSQSSSCEQYF	TRBV2	TRBJ2-7	1.57876e-05
CASSQDCGAETLYF	TRBV2	TRBJ2-3	1.55826e-05
CAGSQGDYNSPLYF	TRBV2	TRBJ1-6	1.53776e-05
CASSPGEYSPLYF	TRBV2	TRBJ1-6	1.53776e-05
CASSPGGFSSERLFF	TRBV2	TRBJ1-4	1.53776e-05
CASSQDINQDTRYF	TRBV2	TRBJ2-5	1.53776e-05
CASSQDSSDETLYF	TRBV2	TRBJ2-3	1.51725e-05
CASSQERTEVFF	TRBV2	TRBJ1-1	1.51725e-05
CAGSPGGFSNERLFF	TRBV2	TRBJ1-4	1.49675e-05
CASSQETGRDTQYF	TRBV2	TRBJ2-5	1.49675e-05
CASSQGDYTSPLYF	TRBV2	TRBJ1-6	1.49675e-05
CTSSPTGQNTEVFF	TRBV2	TRBJ1-1	1.49675e-05
CASGQRDINQDTQYF	TRBV2	TRBJ2-5	1.47625e-05
CASSPGGFSNGRLFF	TRBV2	TRBJ1-4	1.47625e-05
CASSQDPGAETLYF	TRBV2	TRBJ2-3	1.47625e-05
CASSQGGMGSTLYF	TRBV2	TRBJ2-4	1.47625e-05
CARSQSSSYEQYF	TRBV2	TRBJ2-7	1.45574e-05
CASRQDSSNERLFF	TRBV2	TRBJ1-4	1.45574e-05
CASSQDSSNESLFF	TRBV2	TRBJ1-4	1.45574e-05
CASGQGGFSNERLFF	TRBV2	TRBJ1-4	1.43524e-05
CASSPMGQNTEVFF	TRBV2	TRBJ1-1	1.43524e-05
CASSPTGQNPEVFF	TRBV2	TRBJ1-1	1.43524e-05
CASSQSGSYEQYF	TRBV2	TRBJ2-7	1.43524e-05
CARSQEHTEVFF	TRBV2	TRBJ1-1	1.39423e-05
CASSQDRSNERLFF	TRBV2	TRBJ1-4	1.39423e-05
CASSQDSGAETPYF	TRBV2	TRBJ2-3	1.39423e-05
CASSQGHTEVFF	TRBV2	TRBJ1-1	1.39423e-05
CASSRDSSEETLYF	TRBV2	TRBJ2-3	1.39423e-05
CASSPGDYNSPLYF	TRBV2	TRBJ1-6	1.35322e-05
CAGSQDSGAETLYF	TRBV2	TRBJ2-3	1.33272e-05
CASSQGSSYEQYF	TRBV2	TRBJ2-7	1.33272e-05
CVSSPGGFSNERLFF	TRBV2	TRBJ1-4	1.33272e-05
CASSQEHTEAFF	TRBV2	TRBJ1-1	1.31222e-05
CACSPTGQNTEVFF	TRBV2	TRBJ1-1	1.29171e-05
CASSPTGQNTELFF	TRBV2	TRBJ1-1	1.29171e-05
CASSQTGIYAEQLF	TRBV2	TRBJ2-1	1.29171e-05
CASGPGGFSNERLFF	TRBV2	TRBJ1-4	1.27121e-05
CASSRASSAETLYF	TRBV2	TRBJ2-3	1.27121e-05
CPSSQDGSNERLFF	TRBV2	TRBJ1-4	1.27121e-05
CVSSRDSSAETLYF	TRBV2	TRBJ2-3	1.27121e-05
CASSPPGQNTEVFF	TRBV2	TRBJ1-1	1.25071e-05
CASSQGEYSHLYF	TRBV2	TRBJ1-6	1.25071e-05
CASSQRDINQDAQYF	TRBV2	TRBJ2-5	1.25071e-05
CASTPDSSAETLYF	TRBV2	TRBJ2-3	1.25071e-05
CAGSQEHTEVFF	TRBV2	TRBJ1-1	1.2302e-05
CASSLTGQNTEVFF	TRBV2	TRBJ1-1	1.2302e-05
CASSPTGQNIEVFF	TRBV2	TRBJ1-1	1.2302e-05
CASSQEHTEVLF	TRBV2	TRBJ1-1	1.2302e-05
CASSRDTSAETLYF	TRBV2	TRBJ2-3	1.2302e-05
CANSQGEYSPLYF	TRBV2	TRBJ1-6	1.2097e-05
CARSQGGFSNERLFF	TRBV2	TRBJ1-4	1.2097e-05
CASRPGGFSNERLFF	TRBV2	TRBJ1-4	1.2097e-05
CASSQDINKDTQYF	TRBV2	TRBJ2-5	1.2097e-05
CASGQSSSYEQYF	TRBV2	TRBJ2-7	1.1892e-05
CASSQDSTNERLFF	TRBV2	TRBJ1-4	1.1892e-05
CASSQSSPYEQYF	TRBV2	TRBJ2-7	1.1892e-05
CASSQSSSYGQYF	TRBV2	TRBJ2-7	1.1892e-05
CASSRGDYNSPLYF	TRBV2	TRBJ1-6	1.1892e-05
CASRQDSGAETLYF	TRBV2	TRBJ2-3	1.16869e-05
CASSPGGQDTQYF	TRBV2	TRBJ2-5	1.16869e-05
CACSRDSSAETLYF	TRBV2	TRBJ2-3	1.14819e-05
CASGQGQQDTQYF	TRBV2	TRBJ2-5	1.14819e-05
CASSPTEQNTEVFF	TRBV2	TRBJ1-1	1.14819e-05
CASSRDSSTETLYF	TRBV2	TRBJ2-3	1.14819e-05
CASGQDSGAETLYF	TRBV2	TRBJ2-3	1.12769e-05
CASSPGGFSNERLSF	TRBV2	TRBJ1-4	1.12769e-05
CASSQDDWKNTLYF	TRBV2	TRBJ2-4	1.12769e-05
CASSQDSSAAPLYF	TRBV2	TRBJ2-3	1.12769e-05
CASSPDSSAETVYF	TRBV2	TRBJ2-3	1.10718e-05
CASSQDINQDTLYF	TRBV2	TRBJ2-5	1.10718e-05
CASSQESSNERLFF	TRBV2	TRBJ1-4	1.10718e-05
CASSQGDHNSPLYF	TRBV2	TRBJ1-6	1.10718e-05
CASSQDSCNERLFF	TRBV2	TRBJ1-4	1.08668e-05
CASSRDSSAEKLYF	TRBV2	TRBJ2-3	1.08668e-05
CARRPDSSAETLYF	TRBV2	TRBJ2-3	1.06618e-05
CASSPKGQNTEVFF	TRBV2	TRBJ1-1	1.06618e-05
CASSQEHTAVFF	TRBV2	TRBJ1-1	1.06618e-05
CASSRDSSAETLSF	TRBV2	TRBJ2-3	1.06618e-05
CANSPTGQNTEVFF	TRBV2	TRBJ1-1	1.04567e-05
CASCPDSSAETLYF	TRBV2	TRBJ2-3	1.04567e-05
CASSQGDYNSPLHF	TRBV2	TRBJ1-6	1.04567e-05
CASSQSSSYERYF	TRBV2	TRBJ2-7	1.04567e-05
CASSRSSSYEQYF	TRBV2	TRBJ2-7	1.04567e-05
CAGRQDSSAETLYF	TRBV2	TRBJ2-3	1.02517e-05
CARSEDSSAETLYF	TRBV2	TRBJ2-3	1.02517e-05
CASSQDSSEDTLYF	TRBV2	TRBJ2-3	1.02517e-05
CASSQGDYNPPLYF	TRBV2	TRBJ1-6	1.02517e-05
CASSRDSSAATLYF	TRBV2	TRBJ2-3	1.02517e-05
CASSPGGFSNERFFF	TRBV2	TRBJ1-4	1.00467e-05
CARSPTSSAETLYF	TRBV2	TRBJ2-3	9.84163e-06
CASSQEHAEVFF	TRBV2	TRBJ1-1	9.84163e-06
CASSQGGFSNARLFF	TRBV2	TRBJ1-4	9.84163e-06
CASSRDSSAEPLYF	TRBV2	TRBJ2-3	9.84163e-06
CACSQDINQDTQYF	TRBV2	TRBJ2-5	9.6366e-06
CAGSQRDINQDTQYF	TRBV2	TRBJ2-5	9.6366e-06
CARSHDSSAETLYF	TRBV2	TRBJ2-3	9.6366e-06
CASSQDIKQDTQYF	TRBV2	TRBJ2-5	9.6366e-06
CASSQDSGAETLCF	TRBV2	TRBJ2-3	9.6366e-06
CASSQDSSNERSFF	TRBV2	TRBJ1-4	9.6366e-06
CASSQDSGAETLHF	TRBV2	TRBJ2-3	9.43157e-06
CASSQRSSYEQYF	TRBV2	TRBJ2-7	9.43157e-06
CASSQSSSHEQYF	TRBV2	TRBJ2-7	9.43157e-06
CASSRDSNAETLYF	TRBV2	TRBJ2-3	9.43157e-06
CASSRDSSAEMLYF	TRBV2	TRBJ2-3	9.43157e-06
CASSQDSGAGTLYF	TRBV2	TRBJ2-3	9.22653e-06
CASSQRDINQGTQYF	TRBV2	TRBJ2-5	9.22653e-06
CARSQRDINQDTQYF	TRBV2	TRBJ2-5	9.0215e-06
CASSPDGSAETPYF	TRBV2	TRBJ2-3	9.0215e-06
CASSQGEYLPLYF	TRBV2	TRBJ1-6	9.0215e-06
CASTRGGGDTQYF	TRBV2	TRBJ2-5	9.0215e-06
CARSQDSSAEPLYF	TRBV2	TRBJ2-3	8.81646e-06
CASGGGQAPPF	TRBV2	TRBJ1-5	8.81646e-06
CASSPSSSYEQYF	TRBV2	TRBJ2-7	8.81646e-06
CASSQEWGGGQDTQYF	TRBV2	TRBJ2-5	8.81646e-06
CTSSRDSSAETLYF	TRBV2	TRBJ2-3	8.81646e-06
CACSQGEYSPLYF	TRBV2	TRBJ1-6	8.61143e-06
CARSQDSRAETLYF	TRBV2	TRBJ2-3	8.61143e-06
CASSPDRRAETLYF	TRBV2	TRBJ2-3	8.61143e-06
CASSQDINHDTQYF	TRBV2	TRBJ2-5	8.61143e-06
CASSQRDVNQDTQYF	TRBV2	TRBJ2-5	8.61143e-06
CASSHGEYSPLYF	TRBV2	TRBJ1-6	8.4064e-06
CASSPGSFSNERLFF	TRBV2	TRBJ1-4	8.4064e-06
CASSPTGKNTEVFF	TRBV2	TRBJ1-1	8.4064e-06
CASSPTGQTTAVFF	TRBV2	TRBJ1-1	8.4064e-06
CASSPTPSAETLYF	TRBV2	TRBJ2-3	8.4064e-06
CASSPTSSAETLHF	TRBV2	TRBJ2-3	8.4064e-06
CASSQDSRADTLYF	TRBV2	TRBJ2-3	8.4064e-06
CARSQASSAETLYF	TRBV2	TRBJ2-3	8.20136e-06
CASNPTGQNTEVFF	TRBV2	TRBJ1-1	8.20136e-06
CASSPDRSADTLYF	TRBV2	TRBJ2-3	8.20136e-06
CASSQDHTEVFF	TRBV2	TRBJ1-1	8.20136e-06
CVSSQDINQDTQYF	TRBV2	TRBJ2-5	8.20136e-06
CASSATGQNTEVFF	TRBV2	TRBJ1-1	7.99633e-06
CASSQASRAETLYF	TRBV2	TRBJ2-3	7.99633e-06
CASSQDSSKERLFF	TRBV2	TRBJ1-4	7.99633e-06
CASSQGGFSNERLLF	TRBV2	TRBJ1-4	7.99633e-06
CASSQQPNSDYTF	TRBV2	TRBJ1-2	7.99633e-06
CASSQWTGNTEVLF	TRBV2	TRBJ1-1	7.99633e-06
CANSRDSSAETLYF	TRBV2	TRBJ2-3	7.79129e-06
CASGGAPAPLF	TRBV2	TRBJ1-5	7.79129e-06
CASRQDSSAETLSF	TRBV2	TRBJ2-3	7.79129e-06
CASSQDSGADTLYF	TRBV2	TRBJ2-3	7.79129e-06
CASSQGDYNSTLYF	TRBV2	TRBJ1-6	7.79129e-06
CASSQGEYSPLSF	TRBV2	TRBJ1-6	7.79129e-06
CASSQTSSAETLYF	TRBV2	TRBJ2-3	7.79129e-06
CAGSPTSSAETLYF	TRBV2	TRBJ2-3	7.58626e-06
CARSQTGIYAEQFF	TRBV2	TRBJ2-1	7.58626e-06
CASSQDSNADTLYF	TRBV2	TRBJ2-3	7.58626e-06
CASSQDTSNERLFF	TRBV2	TRBJ1-4	7.58626e-06
CASSQGEYSPLCF	TRBV2	TRBJ1-6	7.58626e-06
CVSSQGEYSPLYF	TRBV2	TRBJ1-6	7.58626e-06
CASSPGGFSNERSFF	TRBV2	TRBJ1-4	7.38123e-06
CASSQDPGGAHEQYF	TRBV2	TRBJ2-7	7.38123e-06
CACSQDSSNERLFF	TRBV2	TRBJ1-4	7.17619e-06
CARSQDSSEETLYF	TRBV2	TRBJ2-3	7.17619e-06
CASSQDSNQDTQYF	TRBV2	TRBJ2-5	7.17619e-06
CASSQDSSEEKLYF	TRBV2	TRBJ2-3	7.17619e-06
CASSQRDISQDTQYF	TRBV2	TRBJ2-5	7.17619e-06
CATSPDSSAETLYF	TRBV2	TRBJ2-3	7.17619e-06
CTSSQGEYSPLYF	TRBV2	TRBJ1-6	7.17619e-06
CASNRDSSAETLYF	TRBV2	TRBJ2-3	6.97116e-06
CASSPEGFSNERLFF	TRBV2	TRBJ1-4	6.97116e-06
CASSPTGPNTEVFF	TRBV2	TRBJ1-1	6.97116e-06
CASSPYSGAETLYF	TRBV2	TRBJ2-3	6.97116e-06
CASSQAINQDTQYF	TRBV2	TRBJ2-5	6.97116e-06
CASSQDNSQNTLYF	TRBV2	TRBJ2-4	6.97116e-06
CASSQDRRAETLYF	TRBV2	TRBJ2-3	6.97116e-06
CASSQDSSNETLFF	TRBV2	TRBJ1-4	6.97116e-06
CASSQEHTEDFF	TRBV2	TRBJ1-1	6.97116e-06
CASSQGDYSSPLYF	TRBV2	TRBJ1-6	6.97116e-06
CASSQGESSPLYF	TRBV2	TRBJ1-6	6.97116e-06
CASSQGGFSDERLFF	TRBV2	TRBJ1-4	6.97116e-06
CASSQGGFSNEGLFF	TRBV2	TRBJ1-4	6.97116e-06
CASSQRDINRDTQYF	TRBV2	TRBJ2-5	6.97116e-06
CASSRDSSSETLYF	TRBV2	TRBJ2-3	6.97116e-06
CASSREHTEVFF	TRBV2	TRBJ1-1	6.97116e-06
CASSRGGFSNERLFF	TRBV2	TRBJ1-4	6.97116e-06
CASRQGDYNSPLYF	TRBV2	TRBJ1-6	6.76612e-06
CASSHASSAETLYF	TRBV2	TRBJ2-3	6.76612e-06
CASSHDINQDTQYF	TRBV2	TRBJ2-5	6.76612e-06
CASSQDINQATQYF	TRBV2	TRBJ2-5	6.76612e-06
CASSQDPGASYEQYF	TRBV2	TRBJ2-7	6.76612e-06
CASSQDSSNERFFF	TRBV2	TRBJ1-4	6.76612e-06
CASSQDSSNKRLFF	TRBV2	TRBJ1-4	6.76612e-06
CASSQEHTGVFF	TRBV2	TRBJ1-1	6.76612e-06
CASSQGDYSPLYF	TRBV2	TRBJ1-6	6.76612e-06
CASSQGGLSNERLFF	TRBV2	TRBJ1-4	6.76612e-06
CASSQTGIYAAQFF	TRBV2	TRBJ2-1	6.76612e-06
CASSRDSSVETLYF	TRBV2	TRBJ2-3	6.76612e-06
CASRQSSSYEQYF	TRBV2	TRBJ2-7	6.56109e-06
CASSPTGQHTEVFF	TRBV2	TRBJ1-1	6.56109e-06
CASSPTGQNTEGFF	TRBV2	TRBJ1-1	6.56109e-06
CASSQAGIYAEQFF	TRBV2	TRBJ2-1	6.56109e-06
CASSQDSREETLYF	TRBV2	TRBJ2-3	6.56109e-06
CASSQDTGAETLYF	TRBV2	TRBJ2-3	6.56109e-06
CASSQDWDSQDTQYF	TRBV2	TRBJ2-5	6.56109e-06
CASSQEEYSPLYF	TRBV2	TRBJ1-6	6.56109e-06
CASSQGEYSPIYF	TRBV2	TRBJ1-6	6.56109e-06
CASSQRDINQDTRYF	TRBV2	TRBJ2-5	6.56109e-06
CASSQRWEGNTLYF	TRBV2	TRBJ2-4	6.56109e-06
CASSQSSSYDQYF	TRBV2	TRBJ2-7	6.56109e-06
CASRQDRSAETLYF	TRBV2	TRBJ2-3	6.35606e-06
CASSPGGFSNKRLFF	TRBV2	TRBJ1-4	6.35606e-06
CASSPTAQNTEVFF	TRBV2	TRBJ1-1	6.35606e-06
CASSQDLSAETLYF	TRBV2	TRBJ2-3	6.35606e-06
CASSQDSFNERLFF	TRBV2	TRBJ1-4	6.35606e-06
CASSQEHTEVSF	TRBV2	TRBJ1-1	6.35606e-06
CASSQGDCNSPLYF	TRBV2	TRBJ1-6	6.35606e-06
CASSQGDYDSPLYF	TRBV2	TRBJ1-6	6.35606e-06
CASSQNSSNERLFF	TRBV2	TRBJ1-4	6.35606e-06
CASSQRDINQDTQCF	TRBV2	TRBJ2-5	6.35606e-06
CASSQSSSYEQCF	TRBV2	TRBJ2-7	6.35606e-06
CTSSQDINQDTQYF	TRBV2	TRBJ2-5	6.35606e-06
CASGQEHTKVFF	TRBV2	TRBJ1-1	6.15102e-06
CASSQDSSADTLSF	TRBV2	TRBJ2-3	6.15102e-06
CASSQGEYSLLYF	TRBV2	TRBJ1-6	6.15102e-06
CASSQRHLQNTLYF	TRBV2	TRBJ2-4	6.15102e-06
CASSQSSSSEQYF	TRBV2	TRBJ2-7	6.15102e-06
CASSRVSSAETLYF	TRBV2	TRBJ2-3	6.15102e-06
CASSHDSSNERLFF	TRBV2	TRBJ1-4	5.94599e-06
CASSPTGQNTVVFF	TRBV2	TRBJ1-1	5.94599e-06
CASSQDINQDTPYF	TRBV2	TRBJ2-5	5.94599e-06
CASSQDRSADTLYF	TRBV2	TRBJ2-3	5.94599e-06
CASSQGDYNSPLCF	TRBV2	TRBJ1-6	5.94599e-06
CASSQSRSYEQYF	TRBV2	TRBJ2-7	5.94599e-06
CASSRNSSAETLYF	TRBV2	TRBJ2-3	5.94599e-06
CASSRRDINQDTQYF	TRBV2	TRBJ2-5	5.94599e-06
CAGGGGQAPLF	TRBV2	TRBJ1-5	5.74095e-06
CASNQGEYSPLYF	TRBV2	TRBJ1-6	5.74095e-06
CASRQEHTEVFF	TRBV2	TRBJ1-1	5.74095e-06
CASSPGGFSNESLFF	TRBV2	TRBJ1-4	5.74095e-06
CASSPGTGRDPDYTF	TRBV2	TRBJ1-2	5.74095e-06
CASSPTGQNTEIFF	TRBV2	TRBJ1-1	5.74095e-06
CASSQDSSHERLFF	TRBV2	TRBJ1-4	5.74095e-06
CASSQGGFPNERLFF	TRBV2	TRBJ1-4	5.74095e-06
CASSQGGFSNGRLFF	TRBV2	TRBJ1-4	5.74095e-06
CASSQGGSSNERLFF	TRBV2	TRBJ1-4	5.74095e-06
CASSQGRFSNERLFF	TRBV2	TRBJ1-4	5.74095e-06
CASSQRDINQATQYF	TRBV2	TRBJ2-5	5.74095e-06
CASSQREYSPLYF	TRBV2	TRBJ1-6	5.74095e-06
CTSSQDSSNERLFF	TRBV2	TRBJ1-4	5.74095e-06
CAIRQDSSAETLYF	TRBV2	TRBJ2-3	5.53592e-06
CAISQDGSAETLYF	TRBV2	TRBJ2-3	5.53592e-06
CARGGGQAPLF	TRBV2	TRBJ1-5	5.53592e-06
CASREDSSAETLYF	TRBV2	TRBJ2-3	5.53592e-06
CASSPDSSDETLYF	TRBV2	TRBJ2-3	5.53592e-06
CASSPGGSAETLYF	TRBV2	TRBJ2-3	5.53592e-06
CASSPTGQNTEVYF	TRBV2	TRBJ1-1	5.53592e-06
CASSQDSISETLYF	TRBV2	TRBJ2-3	5.53592e-06
CASSQGTGDRNTLYF	TRBV2	TRBJ2-4	5.53592e-06
CASSQRDIKQDTQYF	TRBV2	TRBJ2-5	5.53592e-06
CAGSQGSSAETLYF	TRBV2	TRBJ2-3	5.33088e-06
CARSQDSSADTLYF	TRBV2	TRBJ2-3	5.33088e-06
CASSPKSSAETLYF	TRBV2	TRBJ2-3	5.33088e-06
CASSPTSSAETPYF	TRBV2	TRBJ2-3	5.33088e-06
CASSQAGGAGQNTLYF	TRBV2	TRBJ2-4	5.33088e-06
CASSQDINAETLYF	TRBV2	TRBJ2-3	5.33088e-06
CASSQDITQDTQYF	TRBV2	TRBJ2-5	5.33088e-06
CASSQDNSNERLFF	TRBV2	TRBJ1-4	5.33088e-06
CASSQETGGALYF	TRBV2	TRBJ2-4	5.33088e-06
CASSQGEYSSLYF	TRBV2	TRBJ1-6	5.33088e-06
CASSQGKYSPLYF	TRBV2	TRBJ1-6	5.33088e-06
CASSQSSSYEPYF	TRBV2	TRBJ2-7	5.33088e-06
CASSQTGISAEQFF	TRBV2	TRBJ2-1	5.33088e-06
CASSQTGTYAEQFF	TRBV2	TRBJ2-1	5.33088e-06
CASSQVSGAETLYF	TRBV2	TRBJ2-3	5.33088e-06
CASSRDSSAETMYF	TRBV2	TRBJ2-3	5.33088e-06
CASSRESSAETLYF	TRBV2	TRBJ2-3	5.33088e-06
CASGPTSSAETLYF	TRBV2	TRBJ2-3	5.12585e-06
CASRHDSSAETLYF	TRBV2	TRBJ2-3	5.12585e-06
CASRPDRSAETLYF	TRBV2	TRBJ2-3	5.12585e-06
CASSPGDFSNERLFF	TRBV2	TRBJ1-4	5.12585e-06
CASSPGGFSNDRLFF	TRBV2	TRBJ1-4	5.12585e-06
CASSQDINQDNQYF	TRBV2	TRBJ2-5	5.12585e-06
CASSQDSSNDRLFF	TRBV2	TRBJ1-4	5.12585e-06
CASSQDSSNERLYF	TRBV2	TRBJ1-4	5.12585e-06
CASSQERGAAETLYF	TRBV2	TRBJ2-3	5.12585e-06
CASSQGGFSNERFFF	TRBV2	TRBJ1-4	5.12585e-06
CASSQGGMGDTLYF	TRBV2	TRBJ2-4	5.12585e-06
CASSQTGIYAEQSF	TRBV2	TRBJ2-1	5.12585e-06
CASSQTGIYAERFF	TRBV2	TRBJ2-1	5.12585e-06
CACSQGDYNSPLYF	TRBV2	TRBJ1-6	4.92082e-06
CARSPDSRAETLYF	TRBV2	TRBJ2-3	4.92082e-06
CARSVRGAIEQYF	TRBV2	TRBJ2-7	4.92082e-06
CASSLGGFSNERLFF	TRBV2	TRBJ1-4	4.92082e-06
CASSPDSSAAPLYF	TRBV2	TRBJ2-3	4.92082e-06
CASSPTGLNTEVFF	TRBV2	TRBJ1-1	4.92082e-06
CASSQASGAETLYF	TRBV2	TRBJ2-3	4.92082e-06
CASSQDSGEETLYF	TRBV2	TRBJ2-3	4.92082e-06
CASSQGAGDQNTLYF	TRBV2	TRBJ2-4	4.92082e-06
CASSQRDINKDTQYF	TRBV2	TRBJ2-5	4.92082e-06
CVSSQDSGAETLYF	TRBV2	TRBJ2-3	4.92082e-06
CVSSQDSSNERLFF	TRBV2	TRBJ1-4	4.92082e-06
CAGGQDSSAETLYF	TRBV2	TRBJ2-3	4.71578e-06
CAGSQASSAETLYF	TRBV2	TRBJ2-3	4.71578e-06
CAISQGSSAETLYF	TRBV2	TRBJ2-3	4.71578e-06
CAISRDSSAETLYF	TRBV2	TRBJ2-3	4.71578e-06
CASSEDINQDTQYF	TRBV2	TRBJ2-5	4.71578e-06
CASSHGDYNSPLYF	TRBV2	TRBJ1-6	4.71578e-06
CASSLTSSAETLYF	TRBV2	TRBJ2-3	4.71578e-06
CASSNLGGGNTLYF	TRBV2	TRBJ2-4	4.71578e-06
CASSPASSEETLYF	TRBV2	TRBJ2-3	4.71578e-06
CASSPDSNEETLYF	TRBV2	TRBJ2-3	4.71578e-06
CASSPTSRAETLYF	TRBV2	TRBJ2-3	4.71578e-06
CASSQDSQNTLYF	TRBV2	TRBJ2-4	4.71578e-06
CASSQGEYAPLYF	TRBV2	TRBJ1-6	4.71578e-06
CASSQGEYSTLYF	TRBV2	TRBJ1-6	4.71578e-06
CASSRDNSAETLYF	TRBV2	TRBJ2-3	4.71578e-06
CASSRDSSAETQYF	TRBV2	TRBJ2-3	4.71578e-06
CAGRPDSSAETLYF	TRBV2	TRBJ2-3	4.51075e-06
CANSQDINQDTQYF	TRBV2	TRBJ2-5	4.51075e-06
CARSPDRSAETLYF	TRBV2	TRBJ2-3	4.51075e-06
CARSPDSSADTLYF	TRBV2	TRBJ2-3	4.51075e-06
CASSHQSANSDYTF	TRBV2	TRBJ1-2	4.51075e-06
CASSPTCSAETLYF	TRBV2	TRBJ2-3	4.51075e-06
CASSQASSAATLYF	TRBV2	TRBJ2-3	4.51075e-06
CASSQDPSNSDYTF	TRBV2	TRBJ1-2	4.51075e-06
CASSQDSGVETLYF	TRBV2	TRBJ2-3	4.51075e-06
CASSQDSSNARLFF	TRBV2	TRBJ1-4	4.51075e-06
CASSQDTEYEQYF	TRBV2	TRBJ2-7	4.51075e-06
CASSQGEYSPFYF	TRBV2	TRBJ1-6	4.51075e-06
CASSQGVYSPLYF	TRBV2	TRBJ1-6	4.51075e-06
CASSQRDTNQDTQYF	TRBV2	TRBJ2-5	4.51075e-06
CASSRDPGGAYEQYF	TRBV2	TRBJ2-7	4.51075e-06
CASSRDSSAVTLYF	TRBV2	TRBJ2-3	4.51075e-06
CASSSGGFSNERLFF	TRBV2	TRBJ1-4	4.51075e-06
CVGSQDSSAETLYF	TRBV2	TRBJ2-3	4.51075e-06
CACSQDSGAETLYF	TRBV2	TRBJ2-3	4.30571e-06
CARGPDSSAETLYF	TRBV2	TRBJ2-3	4.30571e-06
CARSQDSSAATLYF	TRBV2	TRBJ2-3	4.30571e-06
CARSQGSSAETLYF	TRBV2	TRBJ2-3	4.30571e-06
CASRPDSSAETLSF	TRBV2	TRBJ2-3	4.30571e-06
CASRQASSAETLYF	TRBV2	TRBJ2-3	4.30571e-06
CASSEGDYNSPLYF	TRBV2	TRBJ1-6	4.30571e-06
CASSEGEYSPLYF	TRBV2	TRBJ1-6	4.30571e-06
CASSFRGAIEQYF	TRBV2	TRBJ2-7	4.30571e-06
CASSHDSGAETLYF	TRBV2	TRBJ2-3	4.30571e-06
CASSPDSRADTLYF	TRBV2	TRBJ2-3	4.30571e-06
CASSPRDINQDTQYF	TRBV2	TRBJ2-5	4.30571e-06
CASSPTGQTKEVFF	TRBV2	TRBJ1-1	4.30571e-06
CASSPTSSAETLCF	TRBV2	TRBJ2-3	4.30571e-06
CASSQDFGAETLYF	TRBV2	TRBJ2-3	4.30571e-06
CASSQDQGRNTLYF	TRBV2	TRBJ2-4	4.30571e-06
CASSQGGSAETLYF	TRBV2	TRBJ2-3	4.30571e-06
CASSQGTGGTLYF	TRBV2	TRBJ2-4	4.30571e-06
CASSQSSSYAQYF	TRBV2	TRBJ2-7	4.30571e-06
CASSQTGVYAEQFF	TRBV2	TRBJ2-1	4.30571e-06
CASSRDSSGETLYF	TRBV2	TRBJ2-3	4.30571e-06
CASSVGGAIEQYF	TRBV2	TRBJ2-7	4.30571e-06
CAGSQTGIYAEQFF	TRBV2	TRBJ2-1	4.10068e-06
CARSPDSSAEPLYF	TRBV2	TRBJ2-3	4.10068e-06
CASSHSSSYEQYF	TRBV2	TRBJ2-7	4.10068e-06
CASSLGEYSPLYF	TRBV2	TRBJ1-6	4.10068e-06
CASSPDSRAATLYF	TRBV2	TRBJ2-3	4.10068e-06
CASSPDSSEDTLYF	TRBV2	TRBJ2-3	4.10068e-06
CASSPGGFSKERLFF	TRBV2	TRBJ1-4	4.10068e-06
CASSPQGAETLYF	TRBV2	TRBJ2-3	4.10068e-06
CASSPRGQNTEVFF	TRBV2	TRBJ1-1	4.10068e-06
CASSPTSGAETLYF	TRBV2	TRBJ2-3	4.10068e-06
CASSQDFNQDTQYF	TRBV2	TRBJ2-5	4.10068e-06
CASSQDLNQDTQYF	TRBV2	TRBJ2-5	4.10068e-06
CASSQDWGGWSLYF	TRBV2	TRBJ2-4	4.10068e-06
CASSQEAGNYAEQFF	TRBV2	TRBJ2-1	4.10068e-06
CASSQGDYNLPLYF	TRBV2	TRBJ1-6	4.10068e-06
CASSQGDYNSHLYF	TRBV2	TRBJ1-6	4.10068e-06
CASSQGGFSNESLFF	TRBV2	TRBJ1-4	4.10068e-06
CASSQGSSAEALYF	TRBV2	TRBJ2-3	4.10068e-06
CASSQPGQGARGQYF	TRBV2	TRBJ2-7	4.10068e-06
CASSQRDIDQDTQYF	TRBV2	TRBJ2-5	4.10068e-06
CASSQVINQDTQYF	TRBV2	TRBJ2-5	4.10068e-06
CASSRDSCAETLYF	TRBV2	TRBJ2-3	4.10068e-06
CASSRDSSAETLNF	TRBV2	TRBJ2-3	4.10068e-06
CASSVRGAVEQYF	TRBV2	TRBJ2-7	4.10068e-06
CAGIQGGFSNERLFF	TRBV2	TRBJ1-4	3.89565e-06
CAGSQDGSAETLYF	TRBV2	TRBJ2-3	3.89565e-06
CARSQDSSAEKLYF	TRBV2	TRBJ2-3	3.89565e-06
CARSQDSSAETLSF	TRBV2	TRBJ2-3	3.89565e-06
CASSPDRSAATLYF	TRBV2	TRBJ2-3	3.89565e-06
CASSPDSNADTLYF	TRBV2	TRBJ2-3	3.89565e-06
CASSPDSSADTLSF	TRBV2	TRBJ2-3	3.89565e-06
CASSPEHTEVFF	TRBV2	TRBJ1-1	3.89565e-06
CASSQASSAETLSF	TRBV2	TRBJ2-3	3.89565e-06
CASSQDRSAEKLYF	TRBV2	TRBJ2-3	3.89565e-06
CASSQDSSSDTLYF	TRBV2	TRBJ2-3	3.89565e-06
CASSQDWGENTLYF	TRBV2	TRBJ2-4	3.89565e-06
CASSQDWSAETLYF	TRBV2	TRBJ2-3	3.89565e-06
CASSQEHPEVFF	TRBV2	TRBJ1-1	3.89565e-06
CASSQENTEVFF	TRBV2	TRBJ1-1	3.89565e-06
CASSQGGGGARREQYF	TRBV2	TRBJ2-7	3.89565e-06
CASSQGTGGAEVFF	TRBV2	TRBJ1-1	3.89565e-06
CASSQRDINQDTQHF	TRBV2	TRBJ2-5	3.89565e-06
CASSQRDITQDTQYF	TRBV2	TRBJ2-5	3.89565e-06
CASSRDSSAESLYF	TRBV2	TRBJ2-3	3.89565e-06
CSSSRDSSAETLYF	TRBV2	TRBJ2-3	3.89565e-06
CTSSPGGFSNERLFF	TRBV2	TRBJ1-4	3.89565e-06
CACSQSSSYEQYF	TRBV2	TRBJ2-7	3.69061e-06
CAGGPDSSAETLYF	TRBV2	TRBJ2-3	3.69061e-06
CAISQDCSAETLYF	TRBV2	TRBJ2-3	3.69061e-06
CAISQDSSAETPYF	TRBV2	TRBJ2-3	3.69061e-06
CANSPGGFSNERLFF	TRBV2	TRBJ1-4	3.69061e-06
CARSLDSSAETLYF	TRBV2	TRBJ2-3	3.69061e-06
CARSQESSAETLYF	TRBV2	TRBJ2-3	3.69061e-06
CASGQGTGDQNTLYF	TRBV2	TRBJ2-4	3.69061e-06
CASRQDSSADTLYF	TRBV2	TRBJ2-3	3.69061e-06
CASRQDSSEETLYF	TRBV2	TRBJ2-3	3.69061e-06
CASSQCEYSPLYF	TRBV2	TRBJ1-6	3.69061e-06
CASSQDINQDIQYF	TRBV2	TRBJ2-5	3.69061e-06
CASSQDSGAATLYF	TRBV2	TRBJ2-3	3.69061e-06
CASSQDSSAGALYF	TRBV2	TRBJ2-3	3.69061e-06
CASSQEINQDTQYF	TRBV2	TRBJ2-5	3.69061e-06
CASSQEPTEVFF	TRBV2	TRBJ1-1	3.69061e-06
CASSQERSAETLYF	TRBV2	TRBJ2-3	3.69061e-06
CASSQETGGKDTQYF	TRBV2	TRBJ2-5	3.69061e-06
CASSQGDYNSSLYF	TRBV2	TRBJ1-6	3.69061e-06
CASSQGGFSNERSFF	TRBV2	TRBJ1-4	3.69061e-06
CASSQGQQGTQYF	TRBV2	TRBJ2-5	3.69061e-06
CASSQGTGGTAVFF	TRBV2	TRBJ1-1	3.69061e-06
CASSTGENSPLYF	TRBV2	TRBJ1-6	3.69061e-06
CGSSPTGQNTEVFF	TRBV2	TRBJ1-1	3.69061e-06
CTSSQDPGGSYEQYF	TRBV2	TRBJ2-7	3.69061e-06
CACSPGGFSNERLFF	TRBV2	TRBJ1-4	3.48558e-06
CAGSQDPGGAYEQYF	TRBV2	TRBJ2-7	3.48558e-06
CAGSQDSRAETLYF	TRBV2	TRBJ2-3	3.48558e-06
CAGSQDSSAETLHF	TRBV2	TRBJ2-3	3.48558e-06
CAISQDSSAEALYF	TRBV2	TRBJ2-3	3.48558e-06
CARSPDGSAETLYF	TRBV2	TRBJ2-3	3.48558e-06
CARSPGSSAETLYF	TRBV2	TRBJ2-3	3.48558e-06
CARSQDSSAEALYF	TRBV2	TRBJ2-3	3.48558e-06
CASGQERGDAETLYF	TRBV2	TRBJ2-3	3.48558e-06
CASRQGSSAETLYF	TRBV2	TRBJ2-3	3.48558e-06
CASSPASSADTLYF	TRBV2	TRBJ2-3	3.48558e-06
CASSPDRSAETLSF	TRBV2	TRBJ2-3	3.48558e-06
CASSPGGFSTERLFF	TRBV2	TRBJ1-4	3.48558e-06
CASSPTGIYAEQFF	TRBV2	TRBJ2-1	3.48558e-06
CASSQDPGGPYEQYF	TRBV2	TRBJ2-7	3.48558e-06
CASSQEGTYAGTLYF	TRBV2	TRBJ2-3	3.48558e-06
CASSQGDYNSPLSF	TRBV2	TRBJ1-6	3.48558e-06
CASSQGGFSSERLFF	TRBV2	TRBJ1-4	3.48558e-06
CASSQGNYNSPLYF	TRBV2	TRBJ1-6	3.48558e-06
CASSQRDINQDPQYF	TRBV2	TRBJ2-5	3.48558e-06
CASSQTGIYAGQFF	TRBV2	TRBJ2-1	3.48558e-06
CASSQVSSNERLFF	TRBV2	TRBJ1-4	3.48558e-06
CASSQWTGNAEVFF	TRBV2	TRBJ1-1	3.48558e-06
CASSRDSSAKTLYF	TRBV2	TRBJ2-3	3.48558e-06
CASSRDSTAETLYF	TRBV2	TRBJ2-3	3.48558e-06
CASSRTGIYAEQFF	TRBV2	TRBJ2-1	3.48558e-06
CASSTTGQNTEVFF	TRBV2	TRBJ1-1	3.48558e-06
CASSVRGAIEQHF	TRBV2	TRBJ2-7	3.48558e-06
CDSSRDSSAETLYF	TRBV2	TRBJ2-3	3.48558e-06
CGSSRDSSAETLYF	TRBV2	TRBJ2-3	3.48558e-06
CTSSQEHTEVFF	TRBV2	TRBJ1-1	3.48558e-06
CTSSQGDYNSPLYF	TRBV2	TRBJ1-6	3.48558e-06
CVRSQDSSAETLYF	TRBV2	TRBJ2-3	3.48558e-06
CAGSQWDYNSPLYF	TRBV2	TRBJ1-6	3.28054e-06
CARGQDSSAETLYF	TRBV2	TRBJ2-3	3.28054e-06
CARSQDSSAETLHF	TRBV2	TRBJ2-3	3.28054e-06
CARSQDSSAETPYF	TRBV2	TRBJ2-3	3.28054e-06
CASIQGEYSPLYF	TRBV2	TRBJ1-6	3.28054e-06
CASNQDSSNERLFF	TRBV2	TRBJ1-4	3.28054e-06
CASRQDSRAETLYF	TRBV2	TRBJ2-3	3.28054e-06
CASRQGGFSNERLFF	TRBV2	TRBJ1-4	3.28054e-06
CASSEASSAETLYF	TRBV2	TRBJ2-3	3.28054e-06
CASSPASSAEPLYF	TRBV2	TRBJ2-3	3.28054e-06
CASSPDSRAETLSF	TRBV2	TRBJ2-3	3.28054e-06
CASSPTGQNTQVFF	TRBV2	TRBJ1-1	3.28054e-06
CASSQDGGAETLYF	TRBV2	TRBJ2-3	3.28054e-06
CASSQDISADTLYF	TRBV2	TRBJ2-3	3.28054e-06
CASSQDSSAAKLYF	TRBV2	TRBJ2-3	3.28054e-06
CASSQDSSAATLSF	TRBV2	TRBJ2-3	3.28054e-06
CASSQDSSADTQYF	TRBV2	TRBJ2-3	3.28054e-06
CASSQDSSAETPHF	TRBV2	TRBJ2-3	3.28054e-06
CASSQDSSSEPLYF	TRBV2	TRBJ2-3	3.28054e-06
CASSQDYGGAETLYF	TRBV2	TRBJ2-3	3.28054e-06
CASSQERGGYEQYF	TRBV2	TRBJ2-7	3.28054e-06
CASSQESSEETLYF	TRBV2	TRBJ2-3	3.28054e-06
CASSQGDNSPLYF	TRBV2	TRBJ1-6	3.28054e-06
CASSQGEYSPHYF	TRBV2	TRBJ1-6	3.28054e-06
CASSQGEYTPLYF	TRBV2	TRBJ1-6	3.28054e-06
CASSQNTGQLYF	TRBV2	TRBJ2-2	3.28054e-06
CASSQSKYTEVFF	TRBV2	TRBJ1-1	3.28054e-06
CGSSQDSSNERLFF	TRBV2	TRBJ1-4	3.28054e-06
CAGSPDGSAETLYF	TRBV2	TRBJ2-3	3.07551e-06
CAGSPGSSAETLYF	TRBV2	TRBJ2-3	3.07551e-06
CAGSVRGAIEQYF	TRBV2	TRBJ2-7	3.07551e-06
CAISQDSSAGTLYF	TRBV2	TRBJ2-3	3.07551e-06
CANSQGDYNSPLYF	TRBV2	TRBJ1-6	3.07551e-06
CARSPASSAETLYF	TRBV2	TRBJ2-3	3.07551e-06
CARSPDSSAEKLYF	TRBV2	TRBJ2-3	3.07551e-06
CARSPDSSAETLHF	TRBV2	TRBJ2-3	3.07551e-06
CARSQDPSAETLYF	TRBV2	TRBJ2-3	3.07551e-06
CASGPGSSAETLYF	TRBV2	TRBJ2-3	3.07551e-06
CASGQDYGSAETLYF	TRBV2	TRBJ2-3	3.07551e-06
CASNQDINQDTQYF	TRBV2	TRBJ2-5	3.07551e-06
CASNQDSGAETLYF	TRBV2	TRBJ2-3	3.07551e-06
CASRQRDINQDTQYF	TRBV2	TRBJ2-5	3.07551e-06
CASSEDSSNERLFF	TRBV2	TRBJ1-4	3.07551e-06
CASSHDSSAATLYF	TRBV2	TRBJ2-3	3.07551e-06
CASSKDSSNERLFF	TRBV2	TRBJ1-4	3.07551e-06
CASSLRGAIEQYF	TRBV2	TRBJ2-7	3.07551e-06
CASSPDGSAETLHF	TRBV2	TRBJ2-3	3.07551e-06
CASSPDRSAEPLYF	TRBV2	TRBJ2-3	3.07551e-06
CASSPDSSADPLYF	TRBV2	TRBJ2-3	3.07551e-06
CASSPGGFSHERLFF	TRBV2	TRBJ1-4	3.07551e-06
CASSPGTGGDSDYTF	TRBV2	TRBJ1-2	3.07551e-06
CASSPTGGGNSPLYF	TRBV2	TRBJ1-6	3.07551e-06
CASSQARSAETLYF	TRBV2	TRBJ2-3	3.07551e-06
CASSQASSNERLFF	TRBV2	TRBJ1-4	3.07551e-06
CASSQDIHQDTQYF	TRBV2	TRBJ2-5	3.07551e-06
CASSQDINQDTQSF	TRBV2	TRBJ2-5	3.07551e-06
CASSQDSGAETLSF	TRBV2	TRBJ2-3	3.07551e-06
CASSQDSSNERLCF	TRBV2	TRBJ1-4	3.07551e-06
CASSQDYGSAGTLYF	TRBV2	TRBJ2-3	3.07551e-06
CASSQERGDAEALYF	TRBV2	TRBJ2-3	3.07551e-06
CASSQERGDAGTLYF	TRBV2	TRBJ2-3	3.07551e-06
CASSQESSADTLYF	TRBV2	TRBJ2-3	3.07551e-06
CASSQGEYWPLYF	TRBV2	TRBJ1-6	3.07551e-06
CASSQGRGDAETLYF	TRBV2	TRBJ2-3	3.07551e-06
CASSQGSSAETPYF	TRBV2	TRBJ2-3	3.07551e-06
CASSQQDINQDTQYF	TRBV2	TRBJ2-5	3.07551e-06
CASSQRAINQDTQYF	TRBV2	TRBJ2-5	3.07551e-06
CASSQWTGDTEVFF	TRBV2	TRBJ1-1	3.07551e-06
CASSQWTGNIEVFF	TRBV2	TRBJ1-1	3.07551e-06
CASSRDSIAETLYF	TRBV2	TRBJ2-3	3.07551e-06
CASSRDSSAETLDF	TRBV2	TRBJ2-3	3.07551e-06
CASSRDWGDQDTQYF	TRBV2	TRBJ2-5	3.07551e-06
CASSRQENTEAFF	TRBV2	TRBJ1-1	3.07551e-06
CASSVRGAIEQCF	TRBV2	TRBJ2-7	3.07551e-06
CGSSQGGFSNERLFF	TRBV2	TRBJ1-4	3.07551e-06
CVSSQGGFSNERLFF	TRBV2	TRBJ1-4	3.07551e-06
CAGSEDSSAETLYF	TRBV2	TRBJ2-3	2.87048e-06
CAGSPYSSAETLYF	TRBV2	TRBJ2-3	2.87048e-06
CAGSQWTGNTEVFF	TRBV2	TRBJ1-1	2.87048e-06
CAISQDSSEETLYF	TRBV2	TRBJ2-3	2.87048e-06
CANSQDSSNERLFF	TRBV2	TRBJ1-4	2.87048e-06
CARSPDSSEETLYF	TRBV2	TRBJ2-3	2.87048e-06
CARSQDSSAETMYF	TRBV2	TRBJ2-3	2.87048e-06
CARSQERGDAETLYF	TRBV2	TRBJ2-3	2.87048e-06
CASRQDSSAEKLYF	TRBV2	TRBJ2-3	2.87048e-06
CASRQTGGGNSPLYF	TRBV2	TRBJ1-6	2.87048e-06
CASSARGAIEQYF	TRBV2	TRBJ2-7	2.87048e-06
CASSHEHTEVFF	TRBV2	TRBJ1-1	2.87048e-06
CASSLDINQDTQYF	TRBV2	TRBJ2-5	2.87048e-06
CASSLGQGSQNTLYF	TRBV2	TRBJ2-4	2.87048e-06
CASSPDCGAETLYF	TRBV2	TRBJ2-3	2.87048e-06
CASSPDGSADTLYF	TRBV2	TRBJ2-3	2.87048e-06
CASSPERGDAETLYF	TRBV2	TRBJ2-3	2.87048e-06
CASSPGCFSNERLFF	TRBV2	TRBJ1-4	2.87048e-06
CASSPGSSAEPLYF	TRBV2	TRBJ2-3	2.87048e-06
CASSPSGQNTEVFF	TRBV2	TRBJ1-1	2.87048e-06
CASSPTGQNSEVFF	TRBV2	TRBJ1-1	2.87048e-06
CASSPTGQNTEVIF	TRBV2	TRBJ1-1	2.87048e-06
CASSPTSSAGTLYF	TRBV2	TRBJ2-3	2.87048e-06
CASSPTTSAETLYF	TRBV2	TRBJ2-3	2.87048e-06
CASSPTVQNTEVFF	TRBV2	TRBJ1-1	2.87048e-06
CASSQDGSADTLYF	TRBV2	TRBJ2-3	2.87048e-06
CASSQDISEETLYF	TRBV2	TRBJ2-3	2.87048e-06
CASSQDSGTETLYF	TRBV2	TRBJ2-3	2.87048e-06
CASSQEGFSNERLFF	TRBV2	TRBJ1-4	2.87048e-06
CASSQEHTDVFF	TRBV2	TRBJ1-1	2.87048e-06
CASSQGGFSKERLFF	TRBV2	TRBJ1-4	2.87048e-06
CASSQGLGGIEQYF	TRBV2	TRBJ2-7	2.87048e-06
CASSQGPSAETLYF	TRBV2	TRBJ2-3	2.87048e-06
CASSQGYYNSPLYF	TRBV2	TRBJ1-6	2.87048e-06
CASSQRDYNSPLYF	TRBV2	TRBJ1-6	2.87048e-06
CASSQVGNQNTLYF	TRBV2	TRBJ2-4	2.87048e-06
CASSRDISAETLYF	TRBV2	TRBJ2-3	2.87048e-06
CASSWDSSAETLYF	TRBV2	TRBJ2-3	2.87048e-06
CAVSQDSSAETLYF	TRBV2	TRBJ2-3	2.87048e-06
CAWSQDSSAETLYF	TRBV2	TRBJ2-3	2.87048e-06
CVSSQGDYNSPLYF	TRBV2	TRBJ1-6	2.87048e-06
CAGSKDSSAETLYF	TRBV2	TRBJ2-3	2.66544e-06
CAGSPDSSAETLHF	TRBV2	TRBJ2-3	2.66544e-06
CAGSQGTGDQNTLYF	TRBV2	TRBJ2-4	2.66544e-06
CAGSQGTGGTEVFF	TRBV2	TRBJ1-1	2.66544e-06
CAISQDSGAETLYF	TRBV2	TRBJ2-3	2.66544e-06
CANSQGGFSNERLFF	TRBV2	TRBJ1-4	2.66544e-06
CARRRDSSAETLYF	TRBV2	TRBJ2-3	2.66544e-06
CARSPDSSAETLSF	TRBV2	TRBJ2-3	2.66544e-06
CARSQDSSSETLYF	TRBV2	TRBJ2-3	2.66544e-06
CARSQDYGSAETLYF	TRBV2	TRBJ2-3	2.66544e-06
CARSQGTGDQNTLYF	TRBV2	TRBJ2-4	2.66544e-06
CARSQYSSAETLYF	TRBV2	TRBJ2-3	2.66544e-06
CASNPGGFSNERLFF	TRBV2	TRBJ1-4	2.66544e-06
CASNQEHTEVFF	TRBV2	TRBJ1-1	2.66544e-06
CASNQSSSYEQYF	TRBV2	TRBJ2-7	2.66544e-06
CASRPTSSAETLYF	TRBV2	TRBJ2-3	2.66544e-06
CASRQDSSAETPYF	TRBV2	TRBJ2-3	2.66544e-06
CASSHDSSADTLYF	TRBV2	TRBJ2-3	2.66544e-06
CASSKGEYSPLYF	TRBV2	TRBJ1-6	2.66544e-06
CASSPASSAETLSF	TRBV2	TRBJ2-3	2.66544e-06
CASSPDPSAETLYF	TRBV2	TRBJ2-3	2.66544e-06
CASSPGSSAETLHF	TRBV2	TRBJ2-3	2.66544e-06
CASSPRTGRDSDYTF	TRBV2	TRBJ1-2	2.66544e-06
CASSPSSSAETLYF	TRBV2	TRBJ2-3	2.66544e-06
CASSPTSSAEMLYF	TRBV2	TRBJ2-3	2.66544e-06
CASSQDINQDPQYF	TRBV2	TRBJ2-5	2.66544e-06
CASSQDPGGAYERYF	TRBV2	TRBJ2-7	2.66544e-06
CASSQDRSAETLSF	TRBV2	TRBJ2-3	2.66544e-06
CASSQDTGGTLYF	TRBV2	TRBJ2-4	2.66544e-06
CASSQEAGGTLYF	TRBV2	TRBJ2-4	2.66544e-06
CASSQEDYNSPLYF	TRBV2	TRBJ1-6	2.66544e-06
CASSQEGGDAETLYF	TRBV2	TRBJ2-3	2.66544e-06
CASSQEQTEVFF	TRBV2	TRBJ1-1	2.66544e-06
CASSQETGGTLHF	TRBV2	TRBJ2-4	2.66544e-06
CASSQGDINQDTQYF	TRBV2	TRBJ2-5	2.66544e-06
CASSQGDYNSLLYF	TRBV2	TRBJ1-6	2.66544e-06
CASSQGDYNSPFYF	TRBV2	TRBJ1-6	2.66544e-06
CASSQGEFSPLYF	TRBV2	TRBJ1-6	2.66544e-06
CASSQGGDTGQLHF	TRBV2	TRBJ2-2	2.66544e-06
CASSQGGFSNKRLFF	TRBV2	TRBJ1-4	2.66544e-06
CASSQGTAYEQYF	TRBV2	TRBJ2-7	2.66544e-06
CASSQGTGAQNTLYF	TRBV2	TRBJ2-4	2.66544e-06
CASSQGTGDQSTLYF	TRBV2	TRBJ2-4	2.66544e-06
CASSQGTGGQNTLYF	TRBV2	TRBJ2-4	2.66544e-06
CASSQRGFSNERLFF	TRBV2	TRBJ1-4	2.66544e-06
CASSQSNSYEQYF	TRBV2	TRBJ2-7	2.66544e-06
CASSQSSSYEKYF	TRBV2	TRBJ2-7	2.66544e-06
CASSQTGGGNSPPYF	TRBV2	TRBJ1-6	2.66544e-06
CASSQTGLYAEQFF	TRBV2	TRBJ2-1	2.66544e-06
CASSQVEYSPLYF	TRBV2	TRBJ1-6	2.66544e-06
CASSQVSGVDTQYF	TRBV2	TRBJ2-5	2.66544e-06
CASSQWAGNTEVFF	TRBV2	TRBJ1-1	2.66544e-06
CASSQWDINQDTQYF	TRBV2	TRBJ2-5	2.66544e-06
CASSRDSSAERLYF	TRBV2	TRBJ2-3	2.66544e-06
CDSSPTGQNTEVFF	TRBV2	TRBJ1-1	2.66544e-06
CSRSQDSSAETLYF	TRBV2	TRBJ2-3	2.66544e-06
CTSSQSSSYEQYF	TRBV2	TRBJ2-7	2.66544e-06
CVGSPDSSAETLYF	TRBV2	TRBJ2-3	2.66544e-06
CVSSQRDINQDTQYF	TRBV2	TRBJ2-5	2.66544e-06
CACSPTSSAETLYF	TRBV2	TRBJ2-3	2.46041e-06
CAGSQDSSAEALYF	TRBV2	TRBJ2-3	2.46041e-06
CAGSQDSSAETLCF	TRBV2	TRBJ2-3	2.46041e-06
CAGSQDYGSAETLYF	TRBV2	TRBJ2-3	2.46041e-06
CAGSQGGMGNTLYF	TRBV2	TRBJ2-4	2.46041e-06
CARSQDPGGSYEQYF	TRBV2	TRBJ2-7	2.46041e-06
CARSQDRSAETLYF	TRBV2	TRBJ2-3	2.46041e-06
CARSQDSSAGTLYF	TRBV2	TRBJ2-3	2.46041e-06
CARSQGGTTNSDYTF	TRBV2	TRBJ1-2	2.46041e-06
CARSQGQQDTQYF	TRBV2	TRBJ2-5	2.46041e-06
CASGPDGSAETLYF	TRBV2	TRBJ2-3	2.46041e-06
CASGQGTGGTEVFF	TRBV2	TRBJ1-1	2.46041e-06
CASNQGDYNSPLYF	TRBV2	TRBJ1-6	2.46041e-06
CASRADSSAETLYF	TRBV2	TRBJ2-3	2.46041e-06
CASRPDSRAETLYF	TRBV2	TRBJ2-3	2.46041e-06
CASRPDSSEETLYF	TRBV2	TRBJ2-3	2.46041e-06
CASSEDSGAETLYF	TRBV2	TRBJ2-3	2.46041e-06
CASSEDSSAETLSF	TRBV2	TRBJ2-3	2.46041e-06
CASSHDRSAETLYF	TRBV2	TRBJ2-3	2.46041e-06
CASSPDGNAETLYF	TRBV2	TRBJ2-3	2.46041e-06
CASSPDGSAEALYF	TRBV2	TRBJ2-3	2.46041e-06
CASSPDRSAETLHF	TRBV2	TRBJ2-3	2.46041e-06
CASSPDSSAETPHF	TRBV2	TRBJ2-3	2.46041e-06
CASSPGGFYNERLFF	TRBV2	TRBJ1-4	2.46041e-06
CASSPTSSADTLYF	TRBV2	TRBJ2-3	2.46041e-06
CASSPTSSAETLSF	TRBV2	TRBJ2-3	2.46041e-06
CASSPYGSAETLYF	TRBV2	TRBJ2-3	2.46041e-06
CASSPYSSADTLYF	TRBV2	TRBJ2-3	2.46041e-06
CASSPYSSAEALYF	TRBV2	TRBJ2-3	2.46041e-06
CASSQDCSAEALYF	TRBV2	TRBJ2-3	2.46041e-06
CASSQDGSSETLYF	TRBV2	TRBJ2-3	2.46041e-06
CASSQDINQDTKYF	TRBV2	TRBJ2-5	2.46041e-06
CASSQDPGGSYGQYF	TRBV2	TRBJ2-7	2.46041e-06
CASSQDPGVPYEQYF	TRBV2	TRBJ2-7	2.46041e-06
CASSQDPGVSYGQYF	TRBV2	TRBJ2-7	2.46041e-06
CASSQDRSAEPLYF	TRBV2	TRBJ2-3	2.46041e-06
CASSQDSRAETMYF	TRBV2	TRBJ2-3	2.46041e-06
CASSQDSYNERLFF	TRBV2	TRBJ1-4	2.46041e-06
CASSQEDRGSAPPF	TRBV2	TRBJ1-5	2.46041e-06
CASSQEGTANERLFF	TRBV2	TRBJ1-4	2.46041e-06
CASSQESSAATLYF	TRBV2	TRBJ2-3	2.46041e-06
CASSQGDSNSPLYF	TRBV2	TRBJ1-6	2.46041e-06
CASSQGHQDTQYF	TRBV2	TRBJ2-5	2.46041e-06
CASSQGSSADTLYF	TRBV2	TRBJ2-3	2.46041e-06
CASSQGSSAEPLYF	TRBV2	TRBJ2-3	2.46041e-06
CASSQGSSAETLHF	TRBV2	TRBJ2-3	2.46041e-06
CASSQNSSYEQYF	TRBV2	TRBJ2-7	2.46041e-06
CASSQRDINQDTQSF	TRBV2	TRBJ2-5	2.46041e-06
CASSQTGGGNSPLSF	TRBV2	TRBJ1-6	2.46041e-06
CASSQTGIHAEQFF	TRBV2	TRBJ2-1	2.46041e-06
CASSQWTGNTAVFF	TRBV2	TRBJ1-1	2.46041e-06
CASSQYRGQAPLF	TRBV2	TRBJ1-5	2.46041e-06
CASSRDSSAETLFF	TRBV2	TRBJ2-3	2.46041e-06
CASSVRGAIGQYF	TRBV2	TRBJ2-7	2.46041e-06
CVSSQEHTEVFF	TRBV2	TRBJ1-1	2.46041e-06
CACSQEHTEVFF	TRBV2	TRBJ1-1	2.25537e-06
CAGSPDSSEETLYF	TRBV2	TRBJ2-3	2.25537e-06
CAGSPGTGRDSDYTF	TRBV2	TRBJ1-2	2.25537e-06
CAGSQDSSADTLYF	TRBV2	TRBJ2-3	2.25537e-06
CAGSQTGGGNSPLYF	TRBV2	TRBJ1-6	2.25537e-06
CAGSQVRYEQYF	TRBV2	TRBJ2-7	2.25537e-06
CAISQDSSAETLHF	TRBV2	TRBJ2-3	2.25537e-06
CAISQGEYSPLYF	TRBV2	TRBJ1-6	2.25537e-06
CARSQETGGTLYF	TRBV2	TRBJ2-4	2.25537e-06
CARSQWDYNSPLYF	TRBV2	TRBJ1-6	2.25537e-06
CASGGAQAPPF	TRBV2	TRBJ1-5	2.25537e-06
CASGPDSSAETLHF	TRBV2	TRBJ2-3	2.25537e-06
CASGPDTSAETLYF	TRBV2	TRBJ2-3	2.25537e-06
CASGQDCSAETLYF	TRBV2	TRBJ2-3	2.25537e-06
CASGQDSSAEALYF	TRBV2	TRBJ2-3	2.25537e-06
CASGVRGAIEQYF	TRBV2	TRBJ2-7	2.25537e-06
CASRKDSSAETLYF	TRBV2	TRBJ2-3	2.25537e-06
CASRQGQQDTQYF	TRBV2	TRBJ2-5	2.25537e-06
CASSESSSYEQYF	TRBV2	TRBJ2-7	2.25537e-06
CASSGDSDYTF	TRBV2	TRBJ1-2	2.25537e-06
CASSPAGFSNERLFF	TRBV2	TRBJ1-4	2.25537e-06
CASSPDGSAEKLYF	TRBV2	TRBJ2-3	2.25537e-06
CASSPDSSEATLYF	TRBV2	TRBJ2-3	2.25537e-06
CASSPGGFFNERLFF	TRBV2	TRBJ1-4	2.25537e-06
CASSPGGISNERLFF	TRBV2	TRBJ1-4	2.25537e-06
CASSPGGSDTQYF	TRBV2	TRBJ2-5	2.25537e-06
CASSPGSGAETLYF	TRBV2	TRBJ2-3	2.25537e-06
CASSPGSSAATLYF	TRBV2	TRBJ2-3	2.25537e-06
CASSPISSAETLYF	TRBV2	TRBJ2-3	2.25537e-06
CASSPPSSAETLYF	TRBV2	TRBJ2-3	2.25537e-06
CASSPYSSAETLCF	TRBV2	TRBJ2-3	2.25537e-06
CASSPYSSAETQYF	TRBV2	TRBJ2-3	2.25537e-06
CASSQDGGQSNERLFF	TRBV2	TRBJ1-4	2.25537e-06
CASSQDINQDSQYF	TRBV2	TRBJ2-5	2.25537e-06
CASSQDINQNTQYF	TRBV2	TRBJ2-5	2.25537e-06
CASSQDINQVTQYF	TRBV2	TRBJ2-5	2.25537e-06
CASSQDPGGSYEQHF	TRBV2	TRBJ2-7	2.25537e-06
CASSQDRSAETLHF	TRBV2	TRBJ2-3	2.25537e-06
CASSQDSDAETLYF	TRBV2	TRBJ2-3	2.25537e-06
CASSQDSGAEMLYF	TRBV2	TRBJ2-3	2.25537e-06
CASSQDSGAEPLYF	TRBV2	TRBJ2-3	2.25537e-06
CASSQDSIADTLYF	TRBV2	TRBJ2-3	2.25537e-06
CASSQDSNQETQYF	TRBV2	TRBJ2-5	2.25537e-06
CASSQDSSAEAPYF	TRBV2	TRBJ2-3	2.25537e-06
CASSQDSSEKTLYF	TRBV2	TRBJ2-3	2.25537e-06
CASSQDSSNEILFF	TRBV2	TRBJ1-4	2.25537e-06
CASSQDSSYERLFF	TRBV2	TRBJ1-4	2.25537e-06
CASSQDWGADTQYF	TRBV2	TRBJ2-5	2.25537e-06
CASSQDYGSAETPYF	TRBV2	TRBJ2-3	2.25537e-06
CASSQEHTKVFF	TRBV2	TRBJ1-1	2.25537e-06
CASSQEKTGGSDYPF	TRBV2	TRBJ1-2	2.25537e-06
CASSQEQGASDYTF	TRBV2	TRBJ1-2	2.25537e-06
CASSQEYTEVFF	TRBV2	TRBJ1-1	2.25537e-06
CASSQGEYSPRYF	TRBV2	TRBJ1-6	2.25537e-06
CASSQGGFSIERLFF	TRBV2	TRBJ1-4	2.25537e-06
CASSQGGFSNDRLFF	TRBV2	TRBJ1-4	2.25537e-06
CASSQGGTTNSDYAF	TRBV2	TRBJ1-2	2.25537e-06
CASSQGKQGNTEVFF	TRBV2	TRBJ1-1	2.25537e-06
CASSQGQGPPQYF	TRBV2	TRBJ2-5	2.25537e-06
CASSQGQQDTQHF	TRBV2	TRBJ2-5	2.25537e-06
CASSQGQRDTQYF	TRBV2	TRBJ2-5	2.25537e-06
CASSQGTGDQNTSYF	TRBV2	TRBJ2-4	2.25537e-06
CASSQIGIYAEQFF	TRBV2	TRBJ2-1	2.25537e-06
CASSQLQGGDSDYTF	TRBV2	TRBJ1-2	2.25537e-06
CASSQNSGAETLYF	TRBV2	TRBJ2-3	2.25537e-06
CASSQPGQGARERYF	TRBV2	TRBJ2-7	2.25537e-06
CASSQRDINEDTQYF	TRBV2	TRBJ2-5	2.25537e-06
CASSQRDINQDTHYF	TRBV2	TRBJ2-5	2.25537e-06
CASSQSSSYKQYF	TRBV2	TRBJ2-7	2.25537e-06
CASSQSSTYEQYF	TRBV2	TRBJ2-7	2.25537e-06
CASSQTGICAEQFF	TRBV2	TRBJ2-1	2.25537e-06
CASSQTSDTQYF	TRBV2	TRBJ2-5	2.25537e-06
CASSQVQGSYAEQFF	TRBV2	TRBJ2-1	2.25537e-06
CASSQWTGNTEAFF	TRBV2	TRBJ1-1	2.25537e-06
CASSQYSSNERLFF	TRBV2	TRBJ1-4	2.25537e-06
CASSRDSSAETRYF	TRBV2	TRBJ2-3	2.25537e-06
CASSRWTGNTEVFF	TRBV2	TRBJ1-1	2.25537e-06
CASSVRGAIERYF	TRBV2	TRBJ2-7	2.25537e-06
CASSVRGATEQYF	TRBV2	TRBJ2-7	2.25537e-06
CASSVSGAIEQYF	TRBV2	TRBJ2-7	2.25537e-06
CDSSPGGFSNERLFF	TRBV2	TRBJ1-4	2.25537e-06
CDSSQDINQDTQYF	TRBV2	TRBJ2-5	2.25537e-06
CDSSQDSSNERLFF	TRBV2	TRBJ1-4	2.25537e-06
CTSSPTSSAETLYF	TRBV2	TRBJ2-3	2.25537e-06
CACSQDSRAETLYF	TRBV2	TRBJ2-3	2.05034e-06
CACSQTGIYAEQFF	TRBV2	TRBJ2-1	2.05034e-06
CAGSPDSSAATLYF	TRBV2	TRBJ2-3	2.05034e-06
CAGSPDSSAEALYF	TRBV2	TRBJ2-3	2.05034e-06
CAGSQDTSAETLYF	TRBV2	TRBJ2-3	2.05034e-06
CAISPTGQNTEVFF	TRBV2	TRBJ1-1	2.05034e-06
CAISQDRSAETLYF	TRBV2	TRBJ2-3	2.05034e-06
CARRQGEYSPLYF	TRBV2	TRBJ1-6	2.05034e-06
CARSPDSSAATLYF	TRBV2	TRBJ2-3	2.05034e-06
CARSQDPGGAYEQYF	TRBV2	TRBJ2-7	2.05034e-06
CARSQTGGGNSPLYF	TRBV2	TRBJ1-6	2.05034e-06
CASGPDCSAETLYF	TRBV2	TRBJ2-3	2.05034e-06
CASGPDSGAETLYF	TRBV2	TRBJ2-3	2.05034e-06
CASGQWTGNTEVFF	TRBV2	TRBJ1-1	2.05034e-06
CASIPTGQNTEVFF	TRBV2	TRBJ1-1	2.05034e-06
CASRPDSSAETLHF	TRBV2	TRBJ2-3	2.05034e-06
CASRQDSSSETLYF	TRBV2	TRBJ2-3	2.05034e-06
CASRQESSAETLYF	TRBV2	TRBJ2-3	2.05034e-06
CASRQTGIYAEQFF	TRBV2	TRBJ2-1	2.05034e-06
CASSEDSRAETLYF	TRBV2	TRBJ2-3	2.05034e-06
CASSGNSDHTF	TRBV2	TRBJ1-2	2.05034e-06
CASSHDSNAETLYF	TRBV2	TRBJ2-3	2.05034e-06
CASSHRDINQDTQYF	TRBV2	TRBJ2-5	2.05034e-06
CASSLRQGGQNTLYF	TRBV2	TRBJ2-4	2.05034e-06
CASSPDSGAETLHF	TRBV2	TRBJ2-3	2.05034e-06
CASSPDSSAETLRF	TRBV2	TRBJ2-3	2.05034e-06
CASSPGAGRDSDYTF	TRBV2	TRBJ1-2	2.05034e-06
CASSPGGFSNEILFF	TRBV2	TRBJ1-4	2.05034e-06
CASSPGSNAETLYF	TRBV2	TRBJ2-3	2.05034e-06
CASSPGTGRDSDYAF	TRBV2	TRBJ1-2	2.05034e-06
CASSPGTGRESDYTF	TRBV2	TRBJ1-2	2.05034e-06
CASSPRGFSNERLFF	TRBV2	TRBJ1-4	2.05034e-06
CASSPTCQNTEVFF	TRBV2	TRBJ1-1	2.05034e-06
CASSPTGQITEVFF	TRBV2	TRBJ1-1	2.05034e-06
CASSPWTGNTEVFF	TRBV2	TRBJ1-1	2.05034e-06
CASSPYSSAETPYF	TRBV2	TRBJ2-3	2.05034e-06
CASSQATSAETLYF	TRBV2	TRBJ2-3	2.05034e-06
CASSQDINQDTHYF	TRBV2	TRBJ2-5	2.05034e-06
CASSQDPSAEALYF	TRBV2	TRBJ2-3	2.05034e-06
CASSQDRSEETLYF	TRBV2	TRBJ2-3	2.05034e-06
CASSQDSGAETQYF	TRBV2	TRBJ2-3	2.05034e-06
CASSQDSNAETPYF	TRBV2	TRBJ2-3	2.05034e-06
CASSQDSNTETLYF	TRBV2	TRBJ2-3	2.05034e-06
CASSQDSSAEPLSF	TRBV2	TRBJ2-3	2.05034e-06
CASSQDSSAETLRF	TRBV2	TRBJ2-3	2.05034e-06
CASSQDSSAVALYF	TRBV2	TRBJ2-3	2.05034e-06
CASSQDSSEEALYF	TRBV2	TRBJ2-3	2.05034e-06
CASSQDSSNERVFF	TRBV2	TRBJ1-4	2.05034e-06
CASSQDSSTERLFF	TRBV2	TRBJ2-3	2.05034e-06
CASSQDWGNYAEQFF	TRBV2	TRBJ2-1	2.05034e-06
CASSQDYGAETLYF	TRBV2	TRBJ2-3	2.05034e-06
CASSQEGARAETLYF	TRBV2	TRBJ2-3	2.05034e-06
CASSQEPNTEAFF	TRBV2	TRBJ1-1	2.05034e-06
CASSQERGDAETLHF	TRBV2	TRBJ2-3	2.05034e-06
CASSQESGAETLYF	TRBV2	TRBJ2-3	2.05034e-06
CASSQETGGTSYF	TRBV2	TRBJ2-4	2.05034e-06
CASSQEWGGLNSDYTF	TRBV2	TRBJ1-2	2.05034e-06
CASSQGDYNSPHYF	TRBV2	TRBJ1-6	2.05034e-06
CASSQGEYSALYF	TRBV2	TRBJ1-6	2.05034e-06
CASSQGEYSPLYF	TRBV2	TRBJ2-5	2.05034e-06
CASSQGGFSTERLFF	TRBV2	TRBJ1-4	2.05034e-06
CASSQGGFYNERLFF	TRBV2	TRBJ1-4	2.05034e-06
CASSQGGVGNTLYF	TRBV2	TRBJ2-4	2.05034e-06
CASSQGSSAATLYF	TRBV2	TRBJ2-3	2.05034e-06
CASSQGSSSETLYF	TRBV2	TRBJ2-3	2.05034e-06
CASSQNGIYAEQFF	TRBV2	TRBJ2-1	2.05034e-06
CASSQNINQDTQYF	TRBV2	TRBJ2-5	2.05034e-06
CASSQPGRGAREQYF	TRBV2	TRBJ2-7	2.05034e-06
CASSQRDINHDTQYF	TRBV2	TRBJ2-5	2.05034e-06
CASSQRDINQDNQYF	TRBV2	TRBJ2-5	2.05034e-06
CASSQSSSAETLYF	TRBV2	TRBJ2-3	2.05034e-06
CASSQTGIYDEQFF	TRBV2	TRBJ2-1	2.05034e-06
CASSQVRYGQYF	TRBV2	TRBJ2-7	2.05034e-06
CASSRTGQNTEVFF	TRBV2	TRBJ1-1	2.05034e-06
CASSRYSSAETLYF	TRBV2	TRBJ2-3	2.05034e-06
CASSVRGVIEQYF	TRBV2	TRBJ2-7	2.05034e-06
CASTQGEYSPLYF	TRBV2	TRBJ1-6	2.05034e-06
CDRSPDSSAETLYF	TRBV2	TRBJ2-3	2.05034e-06
CDSSQGEYSPLYF	TRBV2	TRBJ1-6	2.05034e-06
CSSSQDSGAETLYF	TRBV2	TRBJ2-3	2.05034e-06
CTSGPDSSAETLYF	TRBV2	TRBJ2-3	2.05034e-06
CTSSQDSGAETLYF	TRBV2	TRBJ2-3	2.05034e-06
CACSQRDINQDTQYF	TRBV2	TRBJ2-5	1.84531e-06
CAGSPDCSAETLYF	TRBV2	TRBJ2-3	1.84531e-06
CAGSPDRSAETLYF	TRBV2	TRBJ2-3	1.84531e-06
CAGSQDCSAETLYF	TRBV2	TRBJ2-3	1.84531e-06
CAGSQDPGVSYEQYF	TRBV2	TRBJ2-7	1.84531e-06
CAGSQDSSAETPYF	TRBV2	TRBJ2-3	1.84531e-06
CAGSQETGGTLYF	TRBV2	TRBJ2-4	1.84531e-06
CAIGQDSSAETLYF	TRBV2	TRBJ2-3	1.84531e-06
CAISQDSSAETLSF	TRBV2	TRBJ2-3	1.84531e-06
CARNQDSSAETLYF	TRBV2	TRBJ2-3	1.84531e-06
CARSLRQGSQNTLYF	TRBV2	TRBJ2-4	1.84531e-06
CARSPDSSAETLCF	TRBV2	TRBJ2-3	1.84531e-06
CARSPWGFSNERLFF	TRBV2	TRBJ1-4	1.84531e-06
CARSQDPGVSYEQYF	TRBV2	TRBJ2-7	1.84531e-06
CARSQDSSAESLYF	TRBV2	TRBJ2-3	1.84531e-06
CARSQVSSAETLYF	TRBV2	TRBJ2-3	1.84531e-06
CASCQGGMGNTLYF	TRBV2	TRBJ2-4	1.84531e-06
CASGPDSSAEALYF	TRBV2	TRBJ2-3	1.84531e-06
CASGPDSSAETLCF	TRBV2	TRBJ2-3	1.84531e-06
CASGPDSSAETPYF	TRBV2	TRBJ2-3	1.84531e-06
CASGPYSSAETLYF	TRBV2	TRBJ2-3	1.84531e-06
CASGQEGQGAAETLYF	TRBV2	TRBJ2-3	1.84531e-06
CASGQGGMGNTLYF	TRBV2	TRBJ2-4	1.84531e-06
CASGQGSSAETLYF	TRBV2	TRBJ2-3	1.84531e-06
CASGRGQAPLF	TRBV2	TRBJ1-5	1.84531e-06
CASIRDSSAETLYF	TRBV2	TRBJ2-3	1.84531e-06
CASQTGVGNTLYF	TRBV2	TRBJ1-3	1.84531e-06
CASRPGSSAETLYF	TRBV2	TRBJ2-3	1.84531e-06
CASRQDSSAATLYF	TRBV2	TRBJ2-3	1.84531e-06
CASRQDSSAEPLYF	TRBV2	TRBJ2-3	1.84531e-06
CASRQDYGSAETLYF	TRBV2	TRBJ2-3	1.84531e-06
CASSEDSSEETLYF	TRBV2	TRBJ2-3	1.84531e-06
CASSHDSSAEPLYF	TRBV2	TRBJ2-3	1.84531e-06
CASSHGSSAETLYF	TRBV2	TRBJ2-3	1.84531e-06
CASSHLGGENTLYF	TRBV2	TRBJ2-4	1.84531e-06
CASSPDSSAATLSF	TRBV2	TRBJ2-3	1.84531e-06
CASSPDSSAEAPYF	TRBV2	TRBJ2-3	1.84531e-06
CASSPDSSAERLFF	TRBV2	TRBJ2-3	1.84531e-06
CASSPEGQGAAETLYF	TRBV2	TRBJ2-3	1.84531e-06
CASSPGGFSIERLFF	TRBV2	TRBJ1-4	1.84531e-06
CASSPTGQNTEVVF	TRBV2	TRBJ1-1	1.84531e-06
CASSPWGLSNERLFF	TRBV2	TRBJ1-4	1.84531e-06
CASSQAHTEVFF	TRBV2	TRBJ1-1	1.84531e-06
CASSQDCSAETLHF	TRBV2	TRBJ2-3	1.84531e-06
CASSQDCSAGTLYF	TRBV2	TRBJ2-3	1.84531e-06
CASSQDCSEETLYF	TRBV2	TRBJ2-3	1.84531e-06
CASSQDIIQDTQYF	TRBV2	TRBJ2-5	1.84531e-06
CASSQDINQDTQNF	TRBV2	TRBJ2-5	1.84531e-06
CASSQDPGGDYEQYF	TRBV2	TRBJ2-7	1.84531e-06
CASSQDRGAETLYF	TRBV2	TRBJ2-3	1.84531e-06
CASSQDSGAEKLYF	TRBV2	TRBJ2-3	1.84531e-06
CASSQDSGAKTLYF	TRBV2	TRBJ2-3	1.84531e-06
CASSQDSGGETLYF	TRBV2	TRBJ2-3	1.84531e-06
CASSQDSNSETLYF	TRBV2	TRBJ2-3	1.84531e-06
CASSQDSSAAMLYF	TRBV2	TRBJ2-3	1.84531e-06
CASSQDSSAATLHF	TRBV2	TRBJ2-3	1.84531e-06
CASSQDSSADALYF	TRBV2	TRBJ2-3	1.84531e-06
CASSQDSSAEALHF	TRBV2	TRBJ2-3	1.84531e-06
CASSQDSSAELLYF	TRBV2	TRBJ2-3	1.84531e-06
CASSQDSSAETLFF	TRBV2	TRBJ1-4	1.84531e-06
CASSQDSSAGTLHF	TRBV2	TRBJ2-3	1.84531e-06
CASSQDSSSETPYF	TRBV2	TRBJ2-3	1.84531e-06
CASSQDWGSSYEQYF	TRBV2	TRBJ2-7	1.84531e-06
CASSQDYGSAETLSF	TRBV2	TRBJ2-3	1.84531e-06
CASSQEGSAETLYF	TRBV2	TRBJ2-3	1.84531e-06
CASSQEGTGSAEALYF	TRBV2	TRBJ2-3	1.84531e-06
CASSQERDTQYF	TRBV2	TRBJ2-5	1.84531e-06
CASSQERGDEETLYF	TRBV2	TRBJ2-3	1.84531e-06
CASSQETGGTEVFF	TRBV2	TRBJ1-1	1.84531e-06
CASSQGGFSNERSSF	TRBV2	TRBJ1-4	1.84531e-06
CASSQGGISNERLFF	TRBV2	TRBJ1-4	1.84531e-06
CASSQGGTTNSDYSF	TRBV2	TRBJ1-2	1.84531e-06
CASSQGPGGSYEQYF	TRBV2	TRBJ2-7	1.84531e-06
CASSQGSRAETLYF	TRBV2	TRBJ2-3	1.84531e-06
CASSQGTGDQNILYF	TRBV2	TRBJ2-4	1.84531e-06
CASSQGTGDQNTLHF	TRBV2	TRBJ2-4	1.84531e-06
CASSQHSSNERLFF	TRBV2	TRBJ1-4	1.84531e-06
CASSQRDINQDTPYF	TRBV2	TRBJ2-5	1.84531e-06
CASSQRDINQETQYF	TRBV2	TRBJ2-5	1.84531e-06
CASSQRDLNQDTQYF	TRBV2	TRBJ2-5	1.84531e-06
CASSQRDSYEQYF	TRBV2	TRBJ2-7	1.84531e-06
CASSQREINQDTQYF	TRBV2	TRBJ2-5	1.84531e-06
CASSQSSSYEQNF	TRBV2	TRBJ2-7	1.84531e-06
CASSQTGGGDSPLYF	TRBV2	TRBJ1-6	1.84531e-06
CASSQTGSYAEQFF	TRBV2	TRBJ2-1	1.84531e-06
CASSQTRIYAEQFF	TRBV2	TRBJ2-1	1.84531e-06
CASSRDSSAQTLYF	TRBV2	TRBJ2-3	1.84531e-06
CATSRDSSAETLYF	TRBV2	TRBJ2-3	1.84531e-06
CSSGQDSSAETLYF	TRBV2	TRBJ2-3	1.84531e-06
CVSSQSSSYEQYF	TRBV2	TRBJ2-7	1.84531e-06
CAGSPDSGAETLYF	TRBV2	TRBJ2-3	1.64027e-06
CAGSPDSSAETPYF	TRBV2	TRBJ2-3	1.64027e-06
CAGSQDPSAETLYF	TRBV2	TRBJ2-3	1.64027e-06
CAGSQDSSAEMLYF	TRBV2	TRBJ2-3	1.64027e-06
CAGSQDSSAGTLYF	TRBV2	TRBJ2-3	1.64027e-06
CAGSQDSSTETLYF	TRBV2	TRBJ2-3	1.64027e-06
CAGSQERGDAETLYF	TRBV2	TRBJ2-3	1.64027e-06
CAGSQESSAETLYF	TRBV2	TRBJ2-3	1.64027e-06
CAGSRQENTEVFF	TRBV2	TRBJ1-1	1.64027e-06
CAISQDINQDTQYF	TRBV2	TRBJ2-5	1.64027e-06
CAISQDSSAETLCF	TRBV2	TRBJ2-3	1.64027e-06
CAISQDTSAETLYF	TRBV2	TRBJ2-3	1.64027e-06
CANSQDSGAETLYF	TRBV2	TRBJ2-3	1.64027e-06
CANSQEHTEVFF	TRBV2	TRBJ1-1	1.64027e-06
CANSQGGTTNSDYTF	TRBV2	TRBJ1-2	1.64027e-06
CANSQRDINQDTQYF	TRBV2	TRBJ2-5	1.64027e-06
CARRPGGFSNERLFF	TRBV2	TRBJ1-4	1.64027e-06
CARSPYSSAETLYF	TRBV2	TRBJ2-3	1.64027e-06
CARSQDSSAETLCF	TRBV2	TRBJ2-3	1.64027e-06
CARSQDSSAETLDF	TRBV2	TRBJ2-3	1.64027e-06
CARSQEGQGAAETLYF	TRBV2	TRBJ2-3	1.64027e-06
CARSQSDSYEQYF	TRBV2	TRBJ2-7	1.64027e-06
CARSQVRYEQYF	TRBV2	TRBJ2-7	1.64027e-06
CARSTDSSAETLYF	TRBV2	TRBJ2-3	1.64027e-06
CASGGGPASLF	TRBV2	TRBJ1-5	1.64027e-06
CASGQDPSAETLYF	TRBV2	TRBJ2-3	1.64027e-06
CASGQGGTTNSDYTF	TRBV2	TRBJ1-2	1.64027e-06
CASGQTGIYAEQFF	TRBV2	TRBJ2-1	1.64027e-06
CASGQWDYNSPLYF	TRBV2	TRBJ1-6	1.64027e-06
CASGWGQAPLF	TRBV2	TRBJ1-5	1.64027e-06
CASIPGGFSNERLFF	TRBV2	TRBJ1-4	1.64027e-06
CASNPTSSAETLYF	TRBV2	TRBJ2-3	1.64027e-06
CASRPDSSAEKLYF	TRBV2	TRBJ2-3	1.64027e-06
CASRQDSSAEMLYF	TRBV2	TRBJ2-3	1.64027e-06
CASRQDSSAETLHF	TRBV2	TRBJ2-3	1.64027e-06
CASRQVRYEQYF	TRBV2	TRBJ2-7	1.64027e-06
CASSADSSADTLYF	TRBV2	TRBJ2-3	1.64027e-06
CASSAGGFSNERLFF	TRBV2	TRBJ1-4	1.64027e-06
CASSEGGFSNERLFF	TRBV2	TRBJ1-4	1.64027e-06
CASSHDSSAETLHF	TRBV2	TRBJ2-3	1.64027e-06
CASSHGGFSNERLFF	TRBV2	TRBJ1-4	1.64027e-06
CASSLGSSAETLYF	TRBV2	TRBJ2-3	1.64027e-06
CASSNLGGENTLHF	TRBV2	TRBJ2-4	1.64027e-06
CASSPCSSAETLYF	TRBV2	TRBJ2-3	1.64027e-06
CASSPDCSAEALYF	TRBV2	TRBJ2-3	1.64027e-06
CASSPGGVSNERLFF	TRBV2	TRBJ1-4	1.64027e-06
CASSPGQQDTQYF	TRBV2	TRBJ2-5	1.64027e-06
CASSPGSSAEALYF	TRBV2	TRBJ2-3	1.64027e-06
CASSPGSSAETLCF	TRBV2	TRBJ2-3	1.64027e-06
CASSPGTGRDSDCTF	TRBV2	TRBJ1-2	1.64027e-06
CASSPTGQNTEVCF	TRBV2	TRBJ1-1	1.64027e-06
CASSPTSSSETLYF	TRBV2	TRBJ2-3	1.64027e-06
CASSPTSSTETLYF	TRBV2	TRBJ2-3	1.64027e-06
CASSPYSSAETLHF	TRBV2	TRBJ2-3	1.64027e-06
CASSQAGGGNSPLYF	TRBV2	TRBJ1-6	1.64027e-06
CASSQASSTETLYF	TRBV2	TRBJ2-3	1.64027e-06
CASSQDCSAETPYF	TRBV2	TRBJ2-3	1.64027e-06
CASSQDGQGAAETLYF	TRBV2	TRBJ2-3	1.64027e-06
CASSQDGRAETLYF	TRBV2	TRBJ2-3	1.64027e-06
CASSQDGSAGTLYF	TRBV2	TRBJ2-3	1.64027e-06
CASSQDINLDTQYF	TRBV2	TRBJ2-5	1.64027e-06
CASSQDLEYEQYF	TRBV2	TRBJ2-7	1.64027e-06
CASSQDNNQDTQYF	TRBV2	TRBJ2-5	1.64027e-06
CASSQDPGEAYEQYF	TRBV2	TRBJ2-7	1.64027e-06
CASSQDPGGAYEQCF	TRBV2	TRBJ2-7	1.64027e-06
CASSQDPGGAYEQHF	TRBV2	TRBJ2-7	1.64027e-06
CASSQDPGVSCEQYF	TRBV2	TRBJ2-7	1.64027e-06
CASSQDPSAETPYF	TRBV2	TRBJ2-3	1.64027e-06
CASSQDRSTETLYF	TRBV2	TRBJ2-3	1.64027e-06
CASSQDSANERLFF	TRBV2	TRBJ1-4	1.64027e-06
CASSQDSGAVTLYF	TRBV2	TRBJ2-3	1.64027e-06
CASSQDSSEETLHF	TRBV2	TRBJ2-3	1.64027e-06
CASSQDSSNEKLFF	TRBV2	TRBJ1-4	1.64027e-06
CASSQDSSQNTLYF	TRBV2	TRBJ2-4	1.64027e-06
CASSQDTGGAYEQYF	TRBV2	TRBJ2-7	1.64027e-06
CASSQDVNNYAEQFF	TRBV2	TRBJ2-1	1.64027e-06
CASSQDYGSAEALYF	TRBV2	TRBJ2-3	1.64027e-06
CASSQDYRAETLYF	TRBV2	TRBJ2-3	1.64027e-06
CASSQEEGPGEQYF	TRBV2	TRBJ2-7	1.64027e-06
CASSQEENSPLYF	TRBV2	TRBJ1-6	1.64027e-06
CASSQEGRGAAETLYF	TRBV2	TRBJ2-3	1.64027e-06
CASSQEGTKDTQYF	TRBV2	TRBJ2-5	1.64027e-06
CASSQEGTYAETPYF	TRBV2	TRBJ2-3	1.64027e-06
CASSQEHKEVFF	TRBV2	TRBJ1-1	1.64027e-06
CASSQERGDAATLYF	TRBV2	TRBJ2-3	1.64027e-06
CASSQESGDQSTLYF	TRBV2	TRBJ2-4	1.64027e-06
CASSQETGDQNTLYF	TRBV2	TRBJ2-4	1.64027e-06
CASSQEWGDAETLYF	TRBV2	TRBJ2-3	1.64027e-06
CASSQGEYSPLFF	TRBV2	TRBJ1-6	1.64027e-06
CASSQGGFANERLFF	TRBV2	TRBJ1-4	1.64027e-06
CASSQGGFSNEILFF	TRBV2	TRBJ1-4	1.64027e-06
CASSQGGTTNSGYTF	TRBV2	TRBJ1-2	1.64027e-06
CASSQGQYSPLYF	TRBV2	TRBJ1-6	1.64027e-06
CASSQGSSAETLCF	TRBV2	TRBJ2-3	1.64027e-06
CASSQGSSAGTLYF	TRBV2	TRBJ2-3	1.64027e-06
CASSQGTGDQDTLYF	TRBV2	TRBJ2-4	1.64027e-06
CASSQGTGDQNTLCF	TRBV2	TRBJ2-4	1.64027e-06
CASSQGTGDQNTLSF	TRBV2	TRBJ2-4	1.64027e-06
CASSQGTGDTEVFF	TRBV2	TRBJ1-1	1.64027e-06
CASSQGTGGQDTQYF	TRBV2	TRBJ2-5	1.64027e-06
CASSQGVYNSPLYF	TRBV2	TRBJ1-6	1.64027e-06
CASSQNSSSETLYF	TRBV2	TRBJ2-3	1.64027e-06
CASSQPLDWGGYTGQLYF	TRBV2	TRBJ2-2	1.64027e-06
CASSQQDTQYF	TRBV2	TRBJ2-5	1.64027e-06
CASSQSGTGKYEQYF	TRBV2	TRBJ2-7	1.64027e-06
CASSQSSAETLYF	TRBV2	TRBJ2-3	1.64027e-06
CASSQSSFYEQYF	TRBV2	TRBJ2-7	1.64027e-06
CASSQSSYYEQYF	TRBV2	TRBJ2-7	1.64027e-06
CASSQTGIYAKQFF	TRBV2	TRBJ2-1	1.64027e-06
CASSQVDYNSPLYF	TRBV2	TRBJ1-6	1.64027e-06
CASSQWAYNSPLYF	TRBV2	TRBJ1-6	1.64027e-06
CASSQWDYTSPLYF	TRBV2	TRBJ1-6	1.64027e-06
CASSQWTGNTEVSF	TRBV2	TRBJ1-1	1.64027e-06
CASSRDPGVSYEQYF	TRBV2	TRBJ2-7	1.64027e-06
CASSRDPSAETLYF	TRBV2	TRBJ2-3	1.64027e-06
CASSRDSNERLFF	TRBV2	TRBJ1-4	1.64027e-06
CASSRGGMGNTLYF	TRBV2	TRBJ2-4	1.64027e-06
CASSRQENAEVFF	TRBV2	TRBJ1-1	1.64027e-06
CASSRTGGGNSPLYF	TRBV2	TRBJ1-6	1.64027e-06
CPSSQGEYSPLYF	TRBV2	TRBJ1-6	1.64027e-06
CSGSQDSSAETLYF	TRBV2	TRBJ2-3	1.64027e-06
CSRSPDSSAETLYF	TRBV2	TRBJ2-3	1.64027e-06
CTSSQRDINQDTQYF	TRBV2	TRBJ2-5	1.64027e-06
CVSSQDSSAEALYF	TRBV2	TRBJ2-3	1.64027e-06
CVSSQGTGDQNTLYF	TRBV2	TRBJ2-4	1.64027e-06
GASSPDSSAETLYF	TRBV2	TRBJ2-3	1.64027e-06
CACSVRGAIEQYF	TRBV2	TRBJ2-7	1.43524e-06
CAGNPDSSAETLYF	TRBV2	TRBJ2-3	1.43524e-06
CAGSQDPGGSYEQYF	TRBV2	TRBJ2-7	1.43524e-06
CAGSQDSSSETLYF	TRBV2	TRBJ2-3	1.43524e-06
CARSPDSSAETPYF	TRBV2	TRBJ2-3	1.43524e-06
CARSPGTGRDSDYTF	TRBV2	TRBJ1-2	1.43524e-06
CARSQDSSAEMLYF	TRBV2	TRBJ2-3	1.43524e-06
CARSQDSSAETRYF	TRBV2	TRBJ2-3	1.43524e-06
CARSQGTGGTEVFF	TRBV2	TRBJ1-1	1.43524e-06
CASCPTGQNTEVFF	TRBV2	TRBJ1-1	1.43524e-06
CASCQDINQDTQYF	TRBV2	TRBJ2-5	1.43524e-06
CASGHDSSAETLYF	TRBV2	TRBJ2-3	1.43524e-06
CASGQASSAETLYF	TRBV2	TRBJ2-3	1.43524e-06
CASGQDPGGSYEQYF	TRBV2	TRBJ2-7	1.43524e-06
CASGQDSSADTLYF	TRBV2	TRBJ2-3	1.43524e-06
CASGQDSSAETLHF	TRBV2	TRBJ2-3	1.43524e-06
CASGQDSSAGTLYF	TRBV2	TRBJ2-3	1.43524e-06
CASGQEHTEAFF	TRBV2	TRBJ1-1	1.43524e-06
CASGQEHTEVSF	TRBV2	TRBJ1-1	1.43524e-06
CASIQGGFSNARLFF	TRBV2	TRBJ1-4	1.43524e-06
CASIQGGFSNGRLFF	TRBV2	TRBJ1-4	1.43524e-06
CASIQTGGGNSPLYF	TRBV2	TRBJ1-6	1.43524e-06
CASRQETGGTLYF	TRBV2	TRBJ2-4	1.43524e-06
CASRQGGQDTQYF	TRBV2	TRBJ2-5	1.43524e-06
CASSHSSTNTGQLYF	TRBV2	TRBJ2-2	1.43524e-06
CASSKDINQDTQYF	TRBV2	TRBJ2-5	1.43524e-06
CASSKSSSYEQYF	TRBV2	TRBJ2-7	1.43524e-06
CASSLDSGAETLYF	TRBV2	TRBJ2-3	1.43524e-06
CASSLDSSNERLFF	TRBV2	TRBJ1-4	1.43524e-06
CASSLGQYAEQFF	TRBV2	TRBJ2-1	1.43524e-06
CASSLRQGSQNTSYF	TRBV2	TRBJ2-4	1.43524e-06
CASSPDGIAETLYF	TRBV2	TRBJ2-3	1.43524e-06
CASSPDGSAATLYF	TRBV2	TRBJ2-3	1.43524e-06
CASSPDPGGSYEQYF	TRBV2	TRBJ2-7	1.43524e-06
CASSPDSSAGALYF	TRBV2	TRBJ2-3	1.43524e-06
CASSPEGSAETLYF	TRBV2	TRBJ2-3	1.43524e-06
CASSPGGFTNERLFF	TRBV2	TRBJ1-4	1.43524e-06
CASSPGTGRDSDYSF	TRBV2	TRBJ1-2	1.43524e-06
CASSPQRIYAEQFF	TRBV2	TRBJ2-1	1.43524e-06
CASSPRGANSDYTF	TRBV2	TRBJ1-2	1.43524e-06
CASSPRQGSQNTLYF	TRBV2	TRBJ2-4	1.43524e-06
CASSPSDSYEQYF	TRBV2	TRBJ2-7	1.43524e-06
CASSPTSNAETLYF	TRBV2	TRBJ2-3	1.43524e-06
CASSPTSSEETLYF	TRBV2	TRBJ2-3	1.43524e-06
CASSPTSSGETLYF	TRBV2	TRBJ2-3	1.43524e-06
CASSPTWQNTEVFF	TRBV2	TRBJ1-1	1.43524e-06
CASSPWGFSNEGLFF	TRBV2	TRBJ1-4	1.43524e-06
CASSPYSRAETLYF	TRBV2	TRBJ2-3	1.43524e-06
CASSPYSSAGTLYF	TRBV2	TRBJ2-3	1.43524e-06
CASSQAEYSPLYF	TRBV2	TRBJ1-6	1.43524e-06
CASSQDGENTLYF	TRBV2	TRBJ2-4	1.43524e-06
CASSQDGSAEPLYF	TRBV2	TRBJ2-3	1.43524e-06
CASSQDISNERLFF	TRBV2	TRBJ1-4	1.43524e-06
CASSQDIYQDTQYF	TRBV2	TRBJ2-5	1.43524e-06
CASSQDLGGSYEQYF	TRBV2	TRBJ2-7	1.43524e-06
CASSQDPGGSYAQYF	TRBV2	TRBJ2-7	1.43524e-06
CASSQDPGGVYEQYF	TRBV2	TRBJ2-7	1.43524e-06
CASSQDPGVSYEQHF	TRBV2	TRBJ2-7	1.43524e-06
CASSQDSNADTLYF	TRBV2	TRBJ2-5	1.43524e-06
CASSQDSSAAALYF	TRBV2	TRBJ2-3	1.43524e-06
CASSQDSSADTLHF	TRBV2	TRBJ2-3	1.43524e-06
CASSQDSSAEKPYF	TRBV2	TRBJ2-3	1.43524e-06
CASSQDSSANTLYF	TRBV2	TRBJ2-3	1.43524e-06
CASSQDTRAETLYF	TRBV2	TRBJ2-3	1.43524e-06
CASSQDYGRAETLYF	TRBV2	TRBJ2-3	1.43524e-06
CASSQEHIEVFF	TRBV2	TRBJ1-1	1.43524e-06
CASSQERGDAETLSF	TRBV2	TRBJ2-3	1.43524e-06
CASSQERGDAETPYF	TRBV2	TRBJ2-3	1.43524e-06
CASSQESGNYAEQFF	TRBV2	TRBJ2-1	1.43524e-06
CASSQESNTEVFF	TRBV2	TRBJ1-1	1.43524e-06
CASSQESSAEKLYF	TRBV2	TRBJ2-3	1.43524e-06
CASSQETGGTLCF	TRBV2	TRBJ2-4	1.43524e-06
CASSQGAGGTEVFF	TRBV2	TRBJ1-1	1.43524e-06
CASSQGAYTSPLYF	TRBV2	TRBJ1-6	1.43524e-06
CASSQGDYNAPLYF	TRBV2	TRBJ1-6	1.43524e-06
CASSQGEYSPLNF	TRBV2	TRBJ1-6	1.43524e-06
CASSQGGATNSDYTF	TRBV2	TRBJ1-2	1.43524e-06
CASSQGGFTNERLFF	TRBV2	TRBJ1-4	1.43524e-06
CASSQGGTTNSDCTF	TRBV2	TRBJ1-2	1.43524e-06
CASSQGIYNSPLYF	TRBV2	TRBJ1-6	1.43524e-06
CASSQGPGDQNTLYF	TRBV2	TRBJ2-4	1.43524e-06
CASSQGPGVSYEQYF	TRBV2	TRBJ2-7	1.43524e-06
CASSQGQHDTQYF	TRBV2	TRBJ2-5	1.43524e-06
CASSQGQQDTRYF	TRBV2	TRBJ2-5	1.43524e-06
CASSQGSGDQNTLYF	TRBV2	TRBJ2-4	1.43524e-06
CASSQGSNAETLYF	TRBV2	TRBJ2-3	1.43524e-06
CASSQGSSAESLYF	TRBV2	TRBJ2-3	1.43524e-06
CASSQGTGDQNALYF	TRBV2	TRBJ2-4	1.43524e-06
CASSQGTGGPEVFF	TRBV2	TRBJ1-1	1.43524e-06
CASSQGTGGTEVLF	TRBV2	TRBJ1-1	1.43524e-06
CASSQGYGSAETLYF	TRBV2	TRBJ2-3	1.43524e-06
CASSQLGAQNTLYF	TRBV2	TRBJ2-4	1.43524e-06
CASSQRDINLDTQYF	TRBV2	TRBJ2-5	1.43524e-06
CASSQRDINPDTQYF	TRBV2	TRBJ2-5	1.43524e-06
CASSQRDINQDIQYF	TRBV2	TRBJ2-5	1.43524e-06
CASSQRDINQVTQYF	TRBV2	TRBJ2-5	1.43524e-06
CASSQRTGDYAEQFF	TRBV2	TRBJ2-1	1.43524e-06
CASSQSDSYEQHF	TRBV2	TRBJ2-7	1.43524e-06
CASSQSDSYERYF	TRBV2	TRBJ2-7	1.43524e-06
CASSQSSSYEHYF	TRBV2	TRBJ2-7	1.43524e-06
CASSQSSSYEQSF	TRBV2	TRBJ2-7	1.43524e-06
CASSQSSSYVQYF	TRBV2	TRBJ2-7	1.43524e-06
CASSQTGFYAEQFF	TRBV2	TRBJ2-1	1.43524e-06
CASSQTGGANSPLYF	TRBV2	TRBJ1-6	1.43524e-06
CASSQTGGGNPPLYF	TRBV2	TRBJ1-6	1.43524e-06
CASSQTGGGNSLLYF	TRBV2	TRBJ1-6	1.43524e-06
CASSQTGIYAEPFF	TRBV2	TRBJ2-1	1.43524e-06
CASSQTGSGNSPLYF	TRBV2	TRBJ1-6	1.43524e-06
CASSQVSYEQYF	TRBV2	TRBJ2-7	1.43524e-06
CASSQWDYNSPHYF	TRBV2	TRBJ1-6	1.43524e-06
CASSQWTGNTGVFF	TRBV2	TRBJ1-1	1.43524e-06
CASSQYINQDTQYF	TRBV2	TRBJ2-5	1.43524e-06
CASSRDSSAETVYF	TRBV2	TRBJ2-3	1.43524e-06
CASSRERGDAETLYF	TRBV2	TRBJ2-3	1.43524e-06
CASSRGTGGTEVFF	TRBV2	TRBJ1-1	1.43524e-06
CASSRHSSAETLYF	TRBV2	TRBJ2-3	1.43524e-06
CASSRQEDTEVFF	TRBV2	TRBJ1-1	1.43524e-06
CASSVRGAIEPYF	TRBV2	TRBJ2-7	1.43524e-06
CDRSQDSSAETLYF	TRBV2	TRBJ2-3	1.43524e-06
CDSSQDSGAETLYF	TRBV2	TRBJ2-3	1.43524e-06
CGSSQGDYNSPLYF	TRBV2	TRBJ1-6	1.43524e-06
CPSSQDSSNEGLFF	TRBV2	TRBJ1-4	1.43524e-06
CPSSQSSSYEQYF	TRBV2	TRBJ2-7	1.43524e-06
CSSSQDCSAETLYF	TRBV2	TRBJ2-3	1.43524e-06
CSSSQDSSNERLFF	TRBV2	TRBJ1-4	1.43524e-06
CTRSQDSSAETLYF	TRBV2	TRBJ2-3	1.43524e-06
CTSSQGGFSNERLFF	TRBV2	TRBJ1-4	1.43524e-06
CTSSQTGIYAEQFF	TRBV2	TRBJ2-1	1.43524e-06
CACGPDSSAETLYF	TRBV2	TRBJ2-3	1.2302e-06
CACRPDSSAETLYF	TRBV2	TRBJ2-3	1.2302e-06
CACSQDSSAEALYF	TRBV2	TRBJ2-3	1.2302e-06
CAGGQEHTEVFF	TRBV2	TRBJ1-1	1.2302e-06
CAGSPDNSAETLYF	TRBV2	TRBJ2-3	1.2302e-06
CAGSPDSSAETLCF	TRBV2	TRBJ2-3	1.2302e-06
CAGSPWGARAETLYF	TRBV2	TRBJ2-3	1.2302e-06
CAGSQDSSAESLYF	TRBV2	TRBJ2-3	1.2302e-06
CAGSQDSSAETLSF	TRBV2	TRBJ2-3	1.2302e-06
CAGSQDSSVETLYF	TRBV2	TRBJ2-3	1.2302e-06
CAGSQEDRGSAPLF	TRBV2	TRBJ1-5	1.2302e-06
CAGSQEGQGAAETLYF	TRBV2	TRBJ2-3	1.2302e-06
CAGSQESGDQNTLYF	TRBV2	TRBJ2-4	1.2302e-06
CAGSQGQQDTQYF	TRBV2	TRBJ2-5	1.2302e-06
CAGSQSDSYEQYF	TRBV2	TRBJ2-7	1.2302e-06
CAISQDSRAETLYF	TRBV2	TRBJ2-3	1.2302e-06
CAISQDSSNERLFF	TRBV2	TRBJ1-4	1.2302e-06
CAISQDSSTETLYF	TRBV2	TRBJ2-3	1.2302e-06
CALSQDSSAETLYF	TRBV2	TRBJ2-3	1.2302e-06
CARIQGGFSNERLFF	TRBV2	TRBJ1-4	1.2302e-06
CARSPDSNAETLYF	TRBV2	TRBJ2-3	1.2302e-06
CARSPDSSAEALYF	TRBV2	TRBJ2-3	1.2302e-06
CARSPDSSAEMLYF	TRBV2	TRBJ2-3	1.2302e-06
CARSPDSSAETLDF	TRBV2	TRBJ2-3	1.2302e-06
CARSQTGNYAEQFF	TRBV2	TRBJ2-1	1.2302e-06
CASGGSQAPLF	TRBV2	TRBJ1-5	1.2302e-06
CASGPDSSAGTLYF	TRBV2	TRBJ2-3	1.2302e-06
CASGQDSSAETPYF	TRBV2	TRBJ2-3	1.2302e-06
CASGQDTSAETLYF	TRBV2	TRBJ2-3	1.2302e-06
CASGQESGDQNTLYF	TRBV2	TRBJ2-4	1.2302e-06
CASGQETGGTLYF	TRBV2	TRBJ2-4	1.2302e-06
CASGQGHTEVFF	TRBV2	TRBJ1-1	1.2302e-06
CASGQTGGGNSPLYF	TRBV2	TRBJ1-6	1.2302e-06
CASGQVRYEQYF	TRBV2	TRBJ2-7	1.2302e-06
CASIQDINQDTQYF	TRBV2	TRBJ2-5	1.2302e-06
CASNQGGFSNERLFF	TRBV2	TRBJ1-4	1.2302e-06
CASNQTGGGNSPLYF	TRBV2	TRBJ1-6	1.2302e-06
CASRPDSSAETPYF	TRBV2	TRBJ2-3	1.2302e-06
CASRPGTGRDSDYTF	TRBV2	TRBJ1-2	1.2302e-06
CASRQDSSAETRYF	TRBV2	TRBJ2-3	1.2302e-06
CASRQEGQGAAETLYF	TRBV2	TRBJ2-3	1.2302e-06
CASRQERGDAETLYF	TRBV2	TRBJ2-3	1.2302e-06
CASSEEHTEVFF	TRBV2	TRBJ1-1	1.2302e-06
CASSERDINQDTQYF	TRBV2	TRBJ2-5	1.2302e-06
CASSGGQAPLF	TRBV2	TRBJ1-5	1.2302e-06
CASSGSSDYTF	TRBV2	TRBJ1-2	1.2302e-06
CASSHDSSAETPYF	TRBV2	TRBJ2-3	1.2302e-06
CASSHTGIYAEQFF	TRBV2	TRBJ2-1	1.2302e-06
CASSHTGQKTEVFF	TRBV2	TRBJ1-1	1.2302e-06
CASSKGDYNSPLYF	TRBV2	TRBJ1-6	1.2302e-06
CASSLGDYNSPLYF	TRBV2	TRBJ1-6	1.2302e-06
CASSNLGGEDTLYF	TRBV2	TRBJ2-4	1.2302e-06
CASSNLGGEKTLYF	TRBV2	TRBJ2-4	1.2302e-06
CASSPASSAETLHF	TRBV2	TRBJ2-3	1.2302e-06
CASSPDCSADTLYF	TRBV2	TRBJ2-3	1.2302e-06
CASSPDGGAETLYF	TRBV2	TRBJ2-3	1.2302e-06
CASSPDGSVETLYF	TRBV2	TRBJ2-3	1.2302e-06
CASSPDNGAETLYF	TRBV2	TRBJ2-3	1.2302e-06
CASSPDSGAATLYF	TRBV2	TRBJ2-3	1.2302e-06
CASSPDSNQDTQYF	TRBV2	TRBJ2-5	1.2302e-06
CASSPDSSAATMYF	TRBV2	TRBJ2-3	1.2302e-06
CASSPDSSADTLCF	TRBV2	TRBJ2-3	1.2302e-06
CASSPDSSAEALCF	TRBV2	TRBJ2-3	1.2302e-06
CASSPDSSAGTLHF	TRBV2	TRBJ2-3	1.2302e-06
CASSPDSSVETLCF	TRBV2	TRBJ2-3	1.2302e-06
CASSPESRAETLYF	TRBV2	TRBJ2-3	1.2302e-06
CASSPGGFSNEKLFF	TRBV2	TRBJ1-4	1.2302e-06
CASSPGGFSNQRLFF	TRBV2	TRBJ1-4	1.2302e-06
CASSPGLGGAAETLYF	TRBV2	TRBJ2-3	1.2302e-06
CASSPGSSAETLSF	TRBV2	TRBJ2-3	1.2302e-06
CASSPGSSAETMYF	TRBV2	TRBJ2-3	1.2302e-06
CASSPGSSAETPYF	TRBV2	TRBJ2-3	1.2302e-06
CASSPGTGGTEVFF	TRBV2	TRBJ1-1	1.2302e-06
CASSPGTGRDSGYTF	TRBV2	TRBJ1-2	1.2302e-06
CASSPGTGRNSDYTF	TRBV2	TRBJ1-2	1.2302e-06
CASSPQGGSSAETLYF	TRBV2	TRBJ2-3	1.2302e-06
CASSPTGLYEQYF	TRBV2	TRBJ2-7	1.2302e-06
CASSPTGQNREVFF	TRBV2	TRBJ1-1	1.2302e-06
CASSPTGQYTEVFF	TRBV2	TRBJ1-1	1.2302e-06
CASSPVGFSNERLFF	TRBV2	TRBJ1-4	1.2302e-06
CASSPYSSAETLSF	TRBV2	TRBJ2-3	1.2302e-06
CASSQATGDQNTLYF	TRBV2	TRBJ2-4	1.2302e-06
CASSQCSSAETLYF	TRBV2	TRBJ2-3	1.2302e-06
CASSQDCGSAETLYF	TRBV2	TRBJ2-3	1.2302e-06
CASSQDDSAETLYF	TRBV2	TRBJ2-3	1.2302e-06
CASSQDGDWGYEQYF	TRBV2	TRBJ2-7	1.2302e-06
CASSQDGSAATLYF	TRBV2	TRBJ2-3	1.2302e-06
CASSQDGSAETLCF	TRBV2	TRBJ2-3	1.2302e-06
CASSQDGSAETPYF	TRBV2	TRBJ2-3	1.2302e-06
CASSQDINQHTQYF	TRBV2	TRBJ2-5	1.2302e-06
CASSQDLGGVEQYF	TRBV2	TRBJ2-7	1.2302e-06
CASSQDLGNYAEQFF	TRBV2	TRBJ2-1	1.2302e-06
CASSQDPGGAYGQYF	TRBV2	TRBJ2-7	1.2302e-06
CASSQDPGGSYEQCF	TRBV2	TRBJ2-7	1.2302e-06
CASSQDPGGSYERYF	TRBV2	TRBJ2-7	1.2302e-06
CASSQDPGVSYERYF	TRBV2	TRBJ2-7	1.2302e-06
CASSQDPSAETLHF	TRBV2	TRBJ2-3	1.2302e-06
CASSQDRSAEALYF	TRBV2	TRBJ2-3	1.2302e-06
CASSQDRYEQYF	TRBV2	TRBJ2-7	1.2302e-06
CASSQDSGAETLFF	TRBV2	TRBJ2-3	1.2302e-06
CASSQDSIAETLHF	TRBV2	TRBJ2-3	1.2302e-06
CASSQDSKAETLYF	TRBV2	TRBJ2-3	1.2302e-06
CASSQDSNAEALYF	TRBV2	TRBJ2-3	1.2302e-06
CASSQDSRAESLYF	TRBV2	TRBJ2-3	1.2302e-06
CASSQDSRAGTLYF	TRBV2	TRBJ2-3	1.2302e-06
CASSQDSSADMLYF	TRBV2	TRBJ2-3	1.2302e-06
CASSQDSSAEALCF	TRBV2	TRBJ2-3	1.2302e-06
CASSQDSSAEALFF	TRBV2	TRBJ2-3	1.2302e-06
CASSQDSSPDTLYF	TRBV2	TRBJ2-3	1.2302e-06
CASSQDSSTATLYF	TRBV2	TRBJ2-3	1.2302e-06
CASSQDTSAETLHF	TRBV2	TRBJ2-3	1.2302e-06
CASSQDTSQNTLYF	TRBV2	TRBJ2-4	1.2302e-06
CASSQDYGAGNTLYF	TRBV2	TRBJ1-3	1.2302e-06
CASSQDYGSAATLYF	TRBV2	TRBJ2-3	1.2302e-06
CASSQEGQGAAEALYF	TRBV2	TRBJ2-3	1.2302e-06
CASSQEGQGAETLYF	TRBV2	TRBJ2-3	1.2302e-06
CASSQEGQSNERLFF	TRBV2	TRBJ1-4	1.2302e-06
CASSQEGTCAETLYF	TRBV2	TRBJ2-3	1.2302e-06
CASSQEGTGRAETLYF	TRBV2	TRBJ2-3	1.2302e-06
CASSQEHSTYEQYF	TRBV2	TRBJ2-7	1.2302e-06
CASSQENWGEDTQYF	TRBV2	TRBJ2-5	1.2302e-06
CASSQEPGVSYEQYF	TRBV2	TRBJ2-7	1.2302e-06
CASSQEPNAEVFF	TRBV2	TRBJ1-1	1.2302e-06
CASSQEPSTEVFF	TRBV2	TRBJ1-1	1.2302e-06
CASSQESGDQNALYF	TRBV2	TRBJ2-4	1.2302e-06
CASSQESSAETLSF	TRBV2	TRBJ2-3	1.2302e-06
CASSQETNTEVFF	TRBV2	TRBJ1-1	1.2302e-06
CASSQGDNNSPLYF	TRBV2	TRBJ1-6	1.2302e-06
CASSQGDRGSAPLF	TRBV2	TRBJ1-5	1.2302e-06
CASSQGDYHSPLYF	TRBV2	TRBJ1-6	1.2302e-06
CASSQGDYKSPLYF	TRBV2	TRBJ1-6	1.2302e-06
CASSQGEYNSPLYF	TRBV2	TRBJ1-6	1.2302e-06
CASSQGGMGNTLCF	TRBV2	TRBJ2-4	1.2302e-06
CASSQGGQNTLYF	TRBV2	TRBJ2-4	1.2302e-06
CASSQGGTGSAETLYF	TRBV2	TRBJ2-3	1.2302e-06
CASSQGGYAEQFF	TRBV2	TRBJ2-1	1.2302e-06
CASSQGPNTEVFF	TRBV2	TRBJ1-1	1.2302e-06
CASSQGQQDAQYF	TRBV2	TRBJ2-5	1.2302e-06
CASSQGTGDHNTLYF	TRBV2	TRBJ2-4	1.2302e-06
CASSQGTGDQTTLYF	TRBV2	TRBJ2-4	1.2302e-06
CASSQGTGGTDVFF	TRBV2	TRBJ1-1	1.2302e-06
CASSQKHTEVFF	TRBV2	TRBJ1-1	1.2302e-06
CASSQMGNTEVFF	TRBV2	TRBJ1-1	1.2302e-06
CASSQPGQNSDYTF	TRBV2	TRBJ1-2	1.2302e-06
CASSQRNINQDTQYF	TRBV2	TRBJ2-5	1.2302e-06
CASSQTGGALNAEQFF	TRBV2	TRBJ2-1	1.2302e-06
CASSQTGGDNSPLYF	TRBV2	TRBJ1-6	1.2302e-06
CASSQTGGGNLPLYF	TRBV2	TRBJ1-6	1.2302e-06
CASSQTGGGNSPFYF	TRBV2	TRBJ1-6	1.2302e-06
CASSQTGGGNSPLCF	TRBV2	TRBJ1-6	1.2302e-06
CASSQTGGGNSPLHF	TRBV2	TRBJ1-6	1.2302e-06
CASSQTGIDAEQFF	TRBV2	TRBJ2-1	1.2302e-06
CASSQTGIYTEQFF	TRBV2	TRBJ2-1	1.2302e-06
CASSQTRGGNSPLYF	TRBV2	TRBJ1-6	1.2302e-06
CASSQVGARAEQFF	TRBV2	TRBJ2-1	1.2302e-06
CASSQWDYNSPPYF	TRBV2	TRBJ1-6	1.2302e-06
CASSQWEYSPLYF	TRBV2	TRBJ1-6	1.2302e-06
CASSRDYGSAETLYF	TRBV2	TRBJ2-3	1.2302e-06
CASSRELGGSTGQLYF	TRBV2	TRBJ2-2	1.2302e-06
CASSRETGGTLYF	TRBV2	TRBJ2-4	1.2302e-06
CASSRGGQDTQYF	TRBV2	TRBJ2-5	1.2302e-06
CASSRGQQDTQYF	TRBV2	TRBJ2-5	1.2302e-06
CASSRQENTGVFF	TRBV2	TRBJ1-1	1.2302e-06
CASSRQESTEVFF	TRBV2	TRBJ1-1	1.2302e-06
CASTRGGEETQYF	TRBV2	TRBJ2-5	1.2302e-06
CGSSQEHTEVFF	TRBV2	TRBJ1-1	1.2302e-06
CGSSQGEYSPLYF	TRBV2	TRBJ1-6	1.2302e-06
CSSSPTGQNTEVFF	TRBV2	TRBJ1-1	1.2302e-06
CSSSQSSSYEQYF	TRBV2	TRBJ2-7	1.2302e-06
CVSSPDSSAETPYF	TRBV2	TRBJ2-3	1.2302e-06
CVSSPTSSAETLYF	TRBV2	TRBJ2-3	1.2302e-06
CVSSQDPGGAYEQYF	TRBV2	TRBJ2-7	1.2302e-06
CVSSQERGDAETLYF	TRBV2	TRBJ2-3	1.2302e-06
CAFSQDSSAETLYF	TRBV2	TRBJ2-3	1.02517e-06
CAGSLDSSAETLYF	TRBV2	TRBJ2-3	1.02517e-06
CAGSPDSRAETLYF	TRBV2	TRBJ2-3	1.02517e-06
CAGSPDSSAEPLYF	TRBV2	TRBJ2-3	1.02517e-06
CAGSPDSSAETQYF	TRBV2	TRBJ2-3	1.02517e-06
CAGSQEPNTEVFF	TRBV2	TRBJ1-1	1.02517e-06
CAISHDSSAETLYF	TRBV2	TRBJ2-3	1.02517e-06
CAISQDSSAATLYF	TRBV2	TRBJ2-3	1.02517e-06
CAISQDSSAEMLYF	TRBV2	TRBJ2-3	1.02517e-06
CAISQEHTEVFF	TRBV2	TRBJ1-1	1.02517e-06
CANSPTSSAETLYF	TRBV2	TRBJ2-3	1.02517e-06
CANSQGSSAETLYF	TRBV2	TRBJ2-3	1.02517e-06
CARGGAQAPLF	TRBV2	TRBJ1-5	1.02517e-06
CARGQEHTEVFF	TRBV2	TRBJ1-1	1.02517e-06
CARRQSSSYEQYF	TRBV2	TRBJ2-7	1.02517e-06
CARSPDSSTETLYF	TRBV2	TRBJ2-3	1.02517e-06
CARSPTGQNTEAFF	TRBV2	TRBJ1-1	1.02517e-06
CARSPTGQNTEDFF	TRBV2	TRBJ1-1	1.02517e-06
CARSQDLGGREQYF	TRBV2	TRBJ2-7	1.02517e-06
CARSQEDRGSAPLF	TRBV2	TRBJ1-5	1.02517e-06
CARSQGGMGNTLYF	TRBV2	TRBJ2-4	1.02517e-06
CARSQGGQDTQYF	TRBV2	TRBJ2-5	1.02517e-06
CARSQNSSAETLYF	TRBV2	TRBJ2-3	1.02517e-06
CARSXDSSAETLYF	TRBV2	TRBJ2-3	1.02517e-06
CASGGGQTPLF	TRBV2	TRBJ1-5	1.02517e-06
CASGPDRSAETLYF	TRBV2	TRBJ2-3	1.02517e-06
CASGPDSRAETLYF	TRBV2	TRBJ2-3	1.02517e-06
CASGQDGSAETLYF	TRBV2	TRBJ2-3	1.02517e-06
CASGQDPGGAYEQYF	TRBV2	TRBJ2-7	1.02517e-06
CASGQDSSAESLYF	TRBV2	TRBJ2-3	1.02517e-06
CASGQDSSSETLYF	TRBV2	TRBJ2-3	1.02517e-06
CASGQEHAEVFF	TRBV2	TRBJ1-1	1.02517e-06
CASGQGEQNTLYF	TRBV2	TRBJ2-4	1.02517e-06
CASIQGDYNSPLYF	TRBV2	TRBJ1-6	1.02517e-06
CASIQGGFSNESLFF	TRBV2	TRBJ1-4	1.02517e-06
CASNQDYGSAETLYF	TRBV2	TRBJ2-3	1.02517e-06
CASNQTGIYAEQFF	TRBV2	TRBJ2-1	1.02517e-06
CASRGTGANTGQLYF	TRBV2	TRBJ2-2	1.02517e-06
CASRPDSGAETLYF	TRBV2	TRBJ2-3	1.02517e-06
CASRPDSSADTLYF	TRBV2	TRBJ2-3	1.02517e-06
CASRPYSSAETLYF	TRBV2	TRBJ2-3	1.02517e-06
CASRQDLGGIEQYF	TRBV2	TRBJ2-7	1.02517e-06
CASRQDSNAETLYF	TRBV2	TRBJ2-3	1.02517e-06
CASRQDSSAETLNF	TRBV2	TRBJ2-3	1.02517e-06
CASRQEGTGSAETLYF	TRBV2	TRBJ2-3	1.02517e-06
CASRQGTGGTEVFF	TRBV2	TRBJ1-1	1.02517e-06
CASRVRGAIEQYF	TRBV2	TRBJ2-7	1.02517e-06
CASSDRGAIEQYF	TRBV2	TRBJ2-7	1.02517e-06
CASSHDPSAETLYF	TRBV2	TRBJ2-3	1.02517e-06
CASSHNSSAETLYF	TRBV2	TRBJ2-3	1.02517e-06
CASSIRGAIEQYF	TRBV2	TRBJ2-7	1.02517e-06
CASSKDSGAETLYF	TRBV2	TRBJ2-3	1.02517e-06
CASSKGSSAETLYF	TRBV2	TRBJ2-3	1.02517e-06
CASSKRDINQDTQYF	TRBV2	TRBJ2-5	1.02517e-06
CASSLRQGRQNTLYF	TRBV2	TRBJ2-4	1.02517e-06
CASSLSSSYEQYF	TRBV2	TRBJ2-7	1.02517e-06
CASSNLGGENPLYF	TRBV2	TRBJ2-4	1.02517e-06
CASSNLGGETTLYF	TRBV2	TRBJ2-4	1.02517e-06
CASSPASSAETMYF	TRBV2	TRBJ2-3	1.02517e-06
CASSPDGSAEMLYF	TRBV2	TRBJ2-3	1.02517e-06
CASSPDGSGETLYF	TRBV2	TRBJ2-3	1.02517e-06
CASSPDNSAEALYF	TRBV2	TRBJ2-3	1.02517e-06
CASSPDSCTETLYF	TRBV2	TRBJ2-3	1.02517e-06
CASSPDSGADTLYF	TRBV2	TRBJ2-3	1.02517e-06
CASSPDSGAEKLYF	TRBV2	TRBJ2-3	1.02517e-06
CASSPDSRAETPYF	TRBV2	TRBJ2-3	1.02517e-06
CASSPDSSAERLFF	TRBV2	TRBJ1-4	1.02517e-06
CASSPDSSAETLPF	TRBV2	TRBJ2-3	1.02517e-06
CASSPDSSAGTPYF	TRBV2	TRBJ2-3	1.02517e-06
CASSPDYSAETLYF	TRBV2	TRBJ2-3	1.02517e-06
CASSPEGTYAETLYF	TRBV2	TRBJ2-3	1.02517e-06
CASSPGAFSNERLFF	TRBV2	TRBJ1-4	1.02517e-06
CASSPGGARAETLYF	TRBV2	TRBJ2-3	1.02517e-06
CASSPGGFCNERLFF	TRBV2	TRBJ1-4	1.02517e-06
CASSPGGFSNERLCF	TRBV2	TRBJ1-4	1.02517e-06
CASSPGLGGDAETLYF	TRBV2	TRBJ2-3	1.02517e-06
CASSPGNSAETLYF	TRBV2	TRBJ2-3	1.02517e-06
CASSPGSSAGTLYF	TRBV2	TRBJ2-3	1.02517e-06
CASSPGSSTETLYF	TRBV2	TRBJ2-3	1.02517e-06
CASSPGTGRDSVYTF	TRBV2	TRBJ1-2	1.02517e-06
CASSPGTGRGSDYTF	TRBV2	TRBJ1-2	1.02517e-06
CASSPQGDQDTQYF	TRBV2	TRBJ2-5	1.02517e-06
CASSPRGARAETLYF	TRBV2	TRBJ2-3	1.02517e-06
CASSPTGGQDTQYF	TRBV2	TRBJ2-5	1.02517e-06
CASSPTSSVETLYF	TRBV2	TRBJ2-3	1.02517e-06
CASSPTYSAETLYF	TRBV2	TRBJ2-3	1.02517e-06
CASSPWGARAGTLYF	TRBV2	TRBJ2-3	1.02517e-06
CASSPWGFSNERFFF	TRBV2	TRBJ1-4	1.02517e-06
CASSQAGNYAEQFF	TRBV2	TRBJ2-1	1.02517e-06
CASSQARGDAETLYF	TRBV2	TRBJ2-3	1.02517e-06
CASSQAWGETLYF	TRBV2	TRBJ2-3	1.02517e-06
CASSQDCSAESLYF	TRBV2	TRBJ2-3	1.02517e-06
CASSQDCSNERLFF	TRBV2	TRBJ1-4	1.02517e-06
CASSQDEVGNYAEQFF	TRBV2	TRBJ2-1	1.02517e-06
CASSQDGCAETLYF	TRBV2	TRBJ2-3	1.02517e-06
CASSQDGEQYF	TRBV2	TRBJ2-7	1.02517e-06
CASSQDGGSQNTLYF	TRBV2	TRBJ2-4	1.02517e-06
CASSQDGTKNERLFF	TRBV2	TRBJ1-4	1.02517e-06
CASSQDLGGYEQYF	TRBV2	TRBJ2-7	1.02517e-06
CASSQDLGVSYEQYF	TRBV2	TRBJ2-7	1.02517e-06
CASSQDPEVSYEQYF	TRBV2	TRBJ2-7	1.02517e-06
CASSQDPGDSYEQYF	TRBV2	TRBJ2-7	1.02517e-06
CASSQDPGGREQYF	TRBV2	TRBJ2-7	1.02517e-06
CASSQDPGGSCEQYF	TRBV2	TRBJ2-7	1.02517e-06
CASSQDPGGSYEQSF	TRBV2	TRBJ2-7	1.02517e-06
CASSQDPSAEPLYF	TRBV2	TRBJ2-3	1.02517e-06
CASSQDRNERLFF	TRBV2	TRBJ1-4	1.02517e-06
CASSQDSGSAETLYF	TRBV2	TRBJ2-3	1.02517e-06
CASSQDSGSETLYF	TRBV2	TRBJ2-3	1.02517e-06
CASSQDSNTGQLYF	TRBV2	TRBJ2-2	1.02517e-06
CASSQDSRSETLYF	TRBV2	TRBJ2-3	1.02517e-06
CASSQDSSADTPYF	TRBV2	TRBJ2-3	1.02517e-06
CASSQDSSAEELYF	TRBV2	TRBJ2-3	1.02517e-06
CASSQDSSAETLPF	TRBV2	TRBJ2-3	1.02517e-06
CASSQDSSAVMLYF	TRBV2	TRBJ2-3	1.02517e-06
CASSQDSSEEMLYF	TRBV2	TRBJ2-3	1.02517e-06
CASSQDSSNERLFF	TRBV2	TRBJ2-3	1.02517e-06
CASSQDSSNESFFF	TRBV2	TRBJ1-4	1.02517e-06
CASSQDSSNQRLFF	TRBV2	TRBJ1-4	1.02517e-06
CASSQDSSVGTLYF	TRBV2	TRBJ2-3	1.02517e-06
CASSQDSSYEQYF	TRBV2	TRBJ2-7	1.02517e-06
CASSQDSVAETLYF	TRBV2	TRBJ2-3	1.02517e-06
CASSQDTSAEALYF	TRBV2	TRBJ2-3	1.02517e-06
CASSQDWGYEQYF	TRBV2	TRBJ2-7	1.02517e-06
CASSQEGQGAAETPYF	TRBV2	TRBJ2-3	1.02517e-06
CASSQEGQGNTQYF	TRBV2	TRBJ2-5	1.02517e-06
CASSQEGTGGYEQYF	TRBV2	TRBJ2-7	1.02517e-06
CASSQEGTTNSDYTF	TRBV2	TRBJ1-2	1.02517e-06
CASSQEGTYAETLCF	TRBV2	TRBJ2-3	1.02517e-06
CASSQEHSEVFF	TRBV2	TRBJ1-1	1.02517e-06
CASSQEPSAETLYF	TRBV2	TRBJ2-3	1.02517e-06
CASSQERGDAEMLYF	TRBV2	TRBJ2-3	1.02517e-06
CASSQERGDAETLCF	TRBV2	TRBJ2-3	1.02517e-06
CASSQERGSAETLYF	TRBV2	TRBJ2-3	1.02517e-06
CASSQERRDAETLYF	TRBV2	TRBJ2-3	1.02517e-06
CASSQESGDQDTLYF	TRBV2	TRBJ2-4	1.02517e-06
CASSQETGDSYEQYF	TRBV2	TRBJ2-7	1.02517e-06
CASSQETGRTLYF	TRBV2	TRBJ2-4	1.02517e-06
CASSQETRGTLYF	TRBV2	TRBJ2-4	1.02517e-06
CASSQGANTGQLYF	TRBV2	TRBJ2-2	1.02517e-06
CASSQGDRTEVFF	TRBV2	TRBJ1-1	1.02517e-06
CASSQGDYISPLYF	TRBV2	TRBJ1-6	1.02517e-06
CASSQGDYNSPIYF	TRBV2	TRBJ1-6	1.02517e-06
CASSQGEYSDYTF	TRBV2	TRBJ1-2	1.02517e-06
CASSQGEYSPLDF	TRBV2	TRBJ1-6	1.02517e-06
CASSQGEYSRLYF	TRBV2	TRBJ1-6	1.02517e-06
CASSQGGFFNERLFF	TRBV2	TRBJ1-4	1.02517e-06
CASSQGGFSHERLFF	TRBV2	TRBJ1-4	1.02517e-06
CASSQGGFSNEKLFF	TRBV2	TRBJ1-4	1.02517e-06
CASSQGGFSYERLFF	TRBV2	TRBJ1-4	1.02517e-06
CASSQGGIGNTLYF	TRBV2	TRBJ2-4	1.02517e-06
CASSQGGQGAAETLYF	TRBV2	TRBJ2-3	1.02517e-06
CASSQGGTTNSDHTF	TRBV2	TRBJ1-2	1.02517e-06
CASSQGGTYAETLYF	TRBV2	TRBJ2-3	1.02517e-06
CASSQGLGGREQYF	TRBV2	TRBJ2-7	1.02517e-06
CASSQGPGGAYEQYF	TRBV2	TRBJ2-7	1.02517e-06
CASSQGQGNSDYTF	TRBV2	TRBJ1-2	1.02517e-06
CASSQGQGQDTQYF	TRBV2	TRBJ2-5	1.02517e-06
CASSQGQQDTPYF	TRBV2	TRBJ2-5	1.02517e-06
CASSQGSGGTEVFF	TRBV2	TRBJ1-1	1.02517e-06
CASSQGSSAEMLYF	TRBV2	TRBJ2-3	1.02517e-06
CASSQGSSAETMYF	TRBV2	TRBJ2-3	1.02517e-06
CASSQGSSTETLYF	TRBV2	TRBJ2-3	1.02517e-06
CASSQGTEGTEVFF	TRBV2	TRBJ1-1	1.02517e-06
CASSQGTGDQNTFYF	TRBV2	TRBJ2-4	1.02517e-06
CASSQGTGGTEAFF	TRBV2	TRBJ1-1	1.02517e-06
CASSQPGLGGSQNTLYF	TRBV2	TRBJ2-4	1.02517e-06
CASSQPGQGAREQHF	TRBV2	TRBJ2-7	1.02517e-06
CASSQPGQTNSDYTF	TRBV2	TRBJ1-2	1.02517e-06
CASSQQPYEQYF	TRBV2	TRBJ2-7	1.02517e-06
CASSQRTGNTEVFF	TRBV2	TRBJ1-1	1.02517e-06
CASSQSCSYEQYF	TRBV2	TRBJ2-7	1.02517e-06
CASSQSDSHEQYF	TRBV2	TRBJ2-7	1.02517e-06
CASSQSSCYEQYF	TRBV2	TRBJ2-7	1.02517e-06
CASSQSSSFEQYF	TRBV2	TRBJ2-7	1.02517e-06
CASSQSSSYELYF	TRBV2	TRBJ2-7	1.02517e-06
CASSQSSSYEQFF	TRBV2	TRBJ2-7	1.02517e-06
CASSQTEIYAEQFF	TRBV2	TRBJ2-1	1.02517e-06
CASSQTGGGKSPLYF	TRBV2	TRBJ1-6	1.02517e-06
CASSQTGGGSSPLYF	TRBV2	TRBJ1-6	1.02517e-06
CASSQTGIYAELFF	TRBV2	TRBJ2-1	1.02517e-06
CASSQTGIYVEQFF	TRBV2	TRBJ2-1	1.02517e-06
CASSQTGNYAEQLF	TRBV2	TRBJ2-1	1.02517e-06
CASSQTGNYAEQSF	TRBV2	TRBJ2-1	1.02517e-06
CASSQVHTEVFF	TRBV2	TRBJ1-1	1.02517e-06
CASSQWDYNSTLYF	TRBV2	TRBJ1-6	1.02517e-06
CASSQWTGKTEVFF	TRBV2	TRBJ1-1	1.02517e-06
CASSRESGDQNTLYF	TRBV2	TRBJ2-4	1.02517e-06
CASSRGTGDQNTLYF	TRBV2	TRBJ2-4	1.02517e-06
CASSRPGQGAREQYF	TRBV2	TRBJ2-7	1.02517e-06
CASSRQENTEVLF	TRBV2	TRBJ1-1	1.02517e-06
CASSRQGNTEVFF	TRBV2	TRBJ1-1	1.02517e-06
CASSRQGRNAEQFF	TRBV2	TRBJ2-1	1.02517e-06
CASSRQNSDYTF	TRBV2	TRBJ1-2	1.02517e-06
CASSRRENTEVFF	TRBV2	TRBJ1-1	1.02517e-06
CASSRTGNYAEQFF	TRBV2	TRBJ2-1	1.02517e-06
CASSVRGAIKQYF	TRBV2	TRBJ2-7	1.02517e-06
CASSVRGTIEQYF	TRBV2	TRBJ2-7	1.02517e-06
CASTPTGQNTEVFF	TRBV2	TRBJ1-1	1.02517e-06
CASTRGGADTQYF	TRBV2	TRBJ2-5	1.02517e-06
CGSSPGGFSNERLFF	TRBV2	TRBJ1-4	1.02517e-06
CGSSQDINQDTQYF	TRBV2	TRBJ2-5	1.02517e-06
CSSSQDSSAETPYF	TRBV2	TRBJ2-3	1.02517e-06
CSSSQDSSAGTLYF	TRBV2	TRBJ2-3	1.02517e-06
CSSSQGDYNSPLYF	TRBV2	TRBJ1-6	1.02517e-06
CSSSQGSSAETLYF	TRBV2	TRBJ2-3	1.02517e-06
CTISQDSSAETLYF	TRBV2	TRBJ2-3	1.02517e-06
CVSSQDGSAETLYF	TRBV2	TRBJ2-3	1.02517e-06
CACSPYSSAETLYF	TRBV2	TRBJ2-3	8.20136e-07
CACSQDSSADTLYF	TRBV2	TRBJ2-3	8.20136e-07
CACSQESGDQNTLYF	TRBV2	TRBJ2-4	8.20136e-07
CADSQDSSAETLYF	TRBV2	TRBJ2-3	8.20136e-07
CAGNQDSSAETLYF	TRBV2	TRBJ2-3	8.20136e-07
CAGSLRQGSQNTLYF	TRBV2	TRBJ2-4	8.20136e-07
CAGSPDSSAETLDF	TRBV2	TRBJ2-3	8.20136e-07
CAGSPDSSAETMYF	TRBV2	TRBJ2-3	8.20136e-07
CAGSPDSSAETRYF	TRBV2	TRBJ2-3	8.20136e-07
CAGSQDLGGREQYF	TRBV2	TRBJ2-7	8.20136e-07
CAGSQDPGGNYEQYF	TRBV2	TRBJ2-7	8.20136e-07
CAGSQEGTGSAETLYF	TRBV2	TRBJ2-3	8.20136e-07
CAGSQGGQDTQYF	TRBV2	TRBJ2-5	8.20136e-07
CAGSQGGSSNERLFF	TRBV2	TRBJ1-4	8.20136e-07
CAGSQGGTTNSDYTF	TRBV2	TRBJ1-2	8.20136e-07
CAINQDSSAETLYF	TRBV2	TRBJ2-3	8.20136e-07
CAISQDSNAETLYF	TRBV2	TRBJ2-3	8.20136e-07
CAISQDSSAETQYF	TRBV2	TRBJ2-3	8.20136e-07
CAISQRDINQDTQYF	TRBV2	TRBJ2-5	8.20136e-07
CAISQVSSAETLYF	TRBV2	TRBJ2-3	8.20136e-07
CAMSQDSSAETLYF	TRBV2	TRBJ2-3	8.20136e-07
CANSPGTGRDSDYTF	TRBV2	TRBJ1-2	8.20136e-07
CANSQEPNTEVFF	TRBV2	TRBJ1-1	8.20136e-07
CANSQGQQDTQYF	TRBV2	TRBJ2-5	8.20136e-07
CANSQTGIYAEQFF	TRBV2	TRBJ2-1	8.20136e-07
CARSPDNSAETLYF	TRBV2	TRBJ2-3	8.20136e-07
CARSPDSGAETLYF	TRBV2	TRBJ2-3	8.20136e-07
CARSPDSSAESLYF	TRBV2	TRBJ2-3	8.20136e-07
CARSPDSSAGTLYF	TRBV2	TRBJ2-3	8.20136e-07
CARSPGLGGVAETLYF	TRBV2	TRBJ2-3	8.20136e-07
CARSQDSSTETLYF	TRBV2	TRBJ2-3	8.20136e-07
CARSQEPNTEVFF	TRBV2	TRBJ1-1	8.20136e-07
CARSQESGDQNTLYF	TRBV2	TRBJ2-4	8.20136e-07
CARSQPGQGAREQYF	TRBV2	TRBJ2-7	8.20136e-07
CASDPDSSAETLYF	TRBV2	TRBJ2-3	8.20136e-07
CASDQDSSAETLYF	TRBV2	TRBJ2-3	8.20136e-07
CASGEDSSAETLYF	TRBV2	TRBJ2-3	8.20136e-07
CASGGGQALLF	TRBV2	TRBJ1-5	8.20136e-07
CASGGVQAPLF	TRBV2	TRBJ1-5	8.20136e-07
CASGLDSSAETLYF	TRBV2	TRBJ2-3	8.20136e-07
CASGPDSNAETLYF	TRBV2	TRBJ2-3	8.20136e-07
CASGPDSSAEMLYF	TRBV2	TRBJ2-3	8.20136e-07
CASGPDSSEETLYF	TRBV2	TRBJ2-3	8.20136e-07
CASGPWGARAETLYF	TRBV2	TRBJ2-3	8.20136e-07
CASGQDLGGIEQYF	TRBV2	TRBJ2-7	8.20136e-07
CASGQDPGVSYEQYF	TRBV2	TRBJ2-7	8.20136e-07
CASGQDRSAETLYF	TRBV2	TRBJ2-3	8.20136e-07
CASGQDSRAETLYF	TRBV2	TRBJ2-3	8.20136e-07
CASGQDSSAETLSF	TRBV2	TRBJ2-3	8.20136e-07
CASGQEGTGSAETLYF	TRBV2	TRBJ2-3	8.20136e-07
CASGQVSSAETLYF	TRBV2	TRBJ2-3	8.20136e-07
CASIQGGFSDERLFF	TRBV2	TRBJ1-4	8.20136e-07
CASIQGGFSNEGLFF	TRBV2	TRBJ1-4	8.20136e-07
CASIQGGFSNERLLF	TRBV2	TRBJ1-4	8.20136e-07
CASNQDSSAGTLYF	TRBV2	TRBJ2-3	8.20136e-07
CASNQERGDAETLYF	TRBV2	TRBJ2-3	8.20136e-07
CASRGTGAYEQYF	TRBV2	TRBJ2-7	8.20136e-07
CASRPDSSAETLNF	TRBV2	TRBJ2-3	8.20136e-07
CASRQDPGGAYEQYF	TRBV2	TRBJ2-7	8.20136e-07
CASRQDSSAETLCF	TRBV2	TRBJ2-3	8.20136e-07
CASRQDSSAGTLYF	TRBV2	TRBJ2-3	8.20136e-07
CASRQEDRGSAPLF	TRBV2	TRBJ1-5	8.20136e-07
CASRQEEGSGEQYF	TRBV2	TRBJ2-7	8.20136e-07
CASRQGGTTNSDYTF	TRBV2	TRBJ1-2	8.20136e-07
CASRQSDSYEQYF	TRBV2	TRBJ2-7	8.20136e-07
CASSGNSDCTF	TRBV2	TRBJ1-2	8.20136e-07
CASSGNSGYTF	TRBV2	TRBJ1-2	8.20136e-07
CASSHDGSAETLYF	TRBV2	TRBJ2-3	8.20136e-07
CASSHDSSAEALYF	TRBV2	TRBJ2-3	8.20136e-07
CASSHEGTGSAETLYF	TRBV2	TRBJ2-3	8.20136e-07
CASSHERGDAETLYF	TRBV2	TRBJ2-3	8.20136e-07
CASSHGTGVTYEQYF	TRBV2	TRBJ2-7	8.20136e-07
CASSHPGQGAREQYF	TRBV2	TRBJ2-7	8.20136e-07
CASSHPQGDTQYF	TRBV2	TRBJ2-5	8.20136e-07
CASSHTGGGNSPLYF	TRBV2	TRBJ1-6	8.20136e-07
CASSKDCSAETLYF	TRBV2	TRBJ2-3	8.20136e-07
CASSKESSAETLYF	TRBV2	TRBJ2-3	8.20136e-07
CASSLDGSAETLYF	TRBV2	TRBJ2-3	8.20136e-07
CASSLDSSAETLHF	TRBV2	TRBJ2-3	8.20136e-07
CASSLDSSAETPYF	TRBV2	TRBJ2-3	8.20136e-07
CASSLEHTEVFF	TRBV2	TRBJ1-1	8.20136e-07
CASSLERGDAETLYF	TRBV2	TRBJ2-3	8.20136e-07
CASSLRDINQDTQYF	TRBV2	TRBJ2-5	8.20136e-07
CASSLRQGSQHTLYF	TRBV2	TRBJ2-4	8.20136e-07
CASSLRQGSQNALYF	TRBV2	TRBJ2-4	8.20136e-07
CASSLYSSAETLYF	TRBV2	TRBJ2-3	8.20136e-07
CASSNLGGENALYF	TRBV2	TRBJ2-4	8.20136e-07
CASSNLGGENTSYF	TRBV2	TRBJ2-4	8.20136e-07
CASSPASSAEALYF	TRBV2	TRBJ2-3	8.20136e-07
CASSPDGSAETLCF	TRBV2	TRBJ2-3	8.20136e-07
CASSPDGSAGTLYF	TRBV2	TRBJ2-3	8.20136e-07
CASSPDGSTETLYF	TRBV2	TRBJ2-3	8.20136e-07
CASSPDISADTLYF	TRBV2	TRBJ2-3	8.20136e-07
CASSPDRSAEALYF	TRBV2	TRBJ2-3	8.20136e-07
CASSPDSGAETPYF	TRBV2	TRBJ2-3	8.20136e-07
CASSPDSGAGTLYF	TRBV2	TRBJ2-3	8.20136e-07
CASSPDSSADTLHF	TRBV2	TRBJ2-3	8.20136e-07
[truncated: 5,315 more rows]
