# Supplementary material for: Neonatal-derived IL-17 producing dermal γδ T cells are required to prevent spontaneous atopic dermatitis
Source: eLife. 2020 Feb 17;9:e51188. doi: 10.7554/eLife.51188 (PMC7025821; doi:10.7554/eLife.51188)
Supplement: Figure 6—source data 2. — Values indicate percent of all reads per sample (total = 1). [file elife-51188-fig6-data2.xlsx]

## Sheet: Sox13KO Va4 Skin
Source Data for Figure 6I.
CDR3_Sequence	TRAV	TRAJ	PercentOfTotal
CALSDNTGNYKYVF	TRAV6D-7	TRAJ40	0.918919
CALNYNVLYF	TRAV6-5	TRAJ21	0.0101351
CALSDNTGNYKYVF	TRAV6D-6	TRAJ40	0.00675676
CALSDTTGNYKYVF	TRAV6D-7	TRAJ40	0.00675676
CVLGDLGNAGAKLTF	TRAV6-2	TRAJ39	0.00337838
CVLGNNNRIFF	TRAV6-2	TRAJ31	0.00337838
CVLGNSAGNKLTF	TRAV6-2	TRAJ17	0.00337838
CVLGYNRIFF	TRAV6-2	TRAJ31	0.00337838
CAMRDSYGDEKITF	TRAV6-3	TRAJ48	0.00337838
CALSDNTGNYKYVF	TRAV6-6	TRAJ40	0.00337838
CAAGGGSALGRLHF	TRAV6-7/DV9	TRAJ18	0.00337838
CAASASLGKLQF	TRAV6-7/DV9	TRAJ24	0.00337838
CALGDNYGGSGNKLIF	TRAV6-7/DV9	TRAJ32	0.00337838
CALSDNTGNYKYVF	TRAV6-7/DV9	TRAJ40	0.00337838
CALGDRGNNRIFF	TRAV6D-5	TRAJ31	0.00337838
CALGDRTGGYKVVF	TRAV6D-5	TRAJ12	0.00337838
CALGDRGNNRIFF	TRAV6D-7	TRAJ31	0.00337838
CALNYNVLYF	TRAV6D-7	TRAJ21	0.00337838
CALSDNYAQGLTF	TRAV6D-7	TRAJ26	0.00337838
CALSDRGTGGADRLTF	TRAV6D-7	TRAJ45	0.00337838
CALSSGTGGYKVVF	TRAV6D-7	TRAJ12	0.00337838
